# Supplementary material for: Matrix effects in Pb/U measurements during LA-ICP-MS analysis of the mineral apatite
Source: Royal Society of Chemistry journal article supplement (doi:10.1039/c6ja00048g), 2016-01-01
Supplement: c6ja00048g2.xlsx [file c6ja00048g2.xlsx]

## Sheet: MC-ICP-MS
Sample	weight, mg	U ppm	Th/U	Pb ppm	206Pb*x10-13 mol	mol% 206Pb*	Pb*/Pbc	Pbc pg	206Pb/204Pb		208Pb/206Pb	207Pb/206Pb	% err	207Pb/235U	% err	206Pb/238U	% err	rho		207Pb/206Pb	% err	207Pb/235U	% err	206Pb/238U	% err		238U/206Pb	% err	207Pb/206Pb	% err	204Pb/206Pb	% err	rho 8/6-7/6	rho 8/6-4/6	rho 7/6-4/6		238U/204Pb	% err	206Pb/204Pb	% err	rho 8/4-6/4		235U/204Pb	% err	207Pb/204Pb	% err	rho 5/4-7/4
													1 sigma		1 sigma		1 sigma				1 sigma		1 sigma		1 sigma			1 sigma		1 sigma		1 sigma						1 sigma		1 sigma				1 sigma		1 sigma
401.1 ap	3.73427	13.9945	9.21546	4.13	186.741	0.988733	85.3498	178.623	1573.28		2.87697	0.0580002	0.126272	0.684851	0.200153	0.0856378	0.15706	0.775933		528.875	2.76695	529.702	0.82609	529.687	0.798967		11.5623	0.241701	0.0656512	2.3911	0.000527665	20.5032	-0.769801	-0.769724	0.999441		21912.2	20.6898	1895.14	20.5032	0.999972		158.922	20.6898	124.418	18.1136	0.999962
401.2 ap	2.28968	15.4885	7.72678	4.0172	126.211	0.989678	82.0617	110.747	1709.06		2.41393	0.0579841	0.189525	0.681955	0.227696	0.0852993	0.0967811	0.573868		528.478	4.15328	527.956	0.937404	527.677	0.490489		11.6308	0.292081	0.064147	3.6331	0.000424959	37.8403	-0.944506	-0.943293	0.998745		27369.2	38.1159	2353.17	37.8403	0.999997		198.5	38.1159	150.949	34.2122	0.999981
401.3 ap	4.30875	14.1811	9.16522	4.17112	218.095	0.98715	74.4916	238.094	1382.11		2.86172	0.0579937	0.0866292	0.684005	0.112247	0.0855416	0.0650053	0.638681		528.635	1.89835	529.192	0.462936	529.115	0.330339		11.5537	0.170974	0.0671539	1.99404	0.000631412	14.6241	-0.930169	-0.929566	0.999084		18298.1	14.7831	1583.75	14.6241	0.999991		132.711	14.7831	106.355	12.6322	0.999965
401.4 ap	2.57884	14.5331	8.87789	4.22661	134.027	0.981701	51.0089	209.595	969.789		2.78664	0.0584107	0.190116	0.690244	0.212805	0.0857055	0.0881711	0.450781		544.353	4.15498	532.947	0.8824	530.089	0.448845		11.4794	0.269589	0.0712204	3.03039	0.000882724	16.8716	-0.955703	-0.954902	0.999242		13004.5	17.1292	1132.86	16.8716	0.999989		94.3176	17.1292	80.6825	13.844	0.999947
401.5 ap	3.81195	13.9075	9.3779	4.20091	190.446	0.981311	51.6832	303.993	951.532		2.91833	0.0578478	0.118628	0.686678	0.135901	0.0860925	0.068649	0.488192		523.092	2.60202	530.803	0.56179	532.386	0.350927		11.4142	0.191132	0.0715949	2.11818	0.000946637	11.0445	-0.947478	-0.946914	0.999385		12057.7	11.2257	1056.37	11.0445	0.999985		87.4505	11.2257	75.6308	8.92795	0.999946
OD306.2	1.35	16.5383	4.81997	10.983	261.806	0.952527	11.892	1150.22	336.513		1.42299	0.0989786	0.16809	3.83662	0.564471	0.281129	0.542322	0.954653		1604.89	3.13445	1600.46	4.54651	1597.05	7.67186		3.39098	0.542852	0.139267	0.47631	0.00292424	1.62783	-0.161497	-0.152941	0.980995		1159.61	1.79299	341.969	1.62783	0.95419		8.41029	1.79299	47.625	1.16425	0.949759
OD306.3	4.78	16.3926	4.79259	10.1608	918.014	0.989692	56.6401	842.714	1550.42		1.41139	0.0984313	0.0821501	3.81207	0.520781	0.280884	0.510346	0.987509		1594.55	1.53395	1595.3	4.18903	1595.81	7.21459		3.52426	0.510518	0.107119	0.18983	0.000630361	2.38386	-0.065851	-0.0455701	0.961215		5590.86	2.46056	1586.39	2.38386	0.978285		40.5487	2.46056	169.933	2.20202	0.977614
OD306.4	2.85	15.6566	4.7809	9.66997	521.209	0.989719	56.7932	476.916	1556.37		1.41007	0.0984455	0.0566713	3.80119	0.513346	0.280041	0.506429	0.993915		1594.82	1.05816	1593	4.12677	1591.57	7.14245		3.53563	0.508086	0.106945	0.335715	0.00061675	4.18692	-0.0963062	-0.0858275	0.988676		5732.68	4.26071	1621.4	4.18692	0.992917		41.5773	4.26071	173.401	3.85534	0.992713
OD306.5	2.59	16.5716	4.88247	10.4552	503.931	0.986258	42.7728	618.694	1163.63		1.43637	0.0984288	0.0733285	3.82017	0.518067	0.281487	0.50933	0.989956		1594.5	1.36924	1597	4.16904	1598.85	7.21232		3.50521	0.510768	0.109909	0.336282	0.000832919	3.1842	-0.0982061	-0.0875461	0.985265		4208.34	3.26876	1200.6	3.1842	0.987811		30.5218	3.26876	131.956	2.85345	0.98739
OD306.6	2.63	15.0723	5.0975	10.1658	466.244	0.962345	15.6243	1608.43	424.118		1.50251	0.0989502	0.137246	3.84719	0.528046	0.281985	0.510522	0.965633		1604.35	2.55946	1602.68	4.25554	1601.35	7.23919		3.41426	0.508633	0.13106	0.289135	0.00233065	1.17118	-0.10512	-0.089221	0.978392		1464.94	1.31782	429.065	1.17118	0.923156		10.6247	1.31782	56.2334	0.890298	0.918838

## Sheet: EMPA
	beam	F TDI	Element wt%, detection limit filtered (99% confidence)																	Precision, wt%, 1 sigma															F TDI hyper-exponential
SAMPLE	size	use	F	Na	Si	P	S	Cl	Ca	Fe	As	Sr	La	Ce	Nd	Th	O	TOTAL		F	Na	Si	P	S	Cl	Ca	Fe	As	Sr	La	Ce	Nd	Th		FWT%	NaWT%	SiWT%	PWT%	SWT%	ClWT%	CaWT%	FeWT%	AsWT%	SrWT%	LaWT%	CeWT%	NdWT%	ThWT%	OWT%
	microns																			0.028028	0.00775184	0.00640795	0.0653252	0.00347605	0.00430118	0.0797089	0.0120125	0.00911669	0.00728692	0.00993815	0.0238847	0.0188041	0.00975413
																				0.00251002	0.00105857	0.00114707	0.000845597	0.00109344	0.00157524	0.00050098	0.000277358	0.000405083	0.000824492	0.000490921	0.00267165	0.00132907	0.000484656
OD306-1	30	e	3.9715	0.064003	0.331844	17.9382	0.074197	0.11795	39.0925	0.026695	<0.019	0.033309	0.332927	0.756083	0.302348	<0.019	37.8369	100.878		0.0294078	0.00829856	0.00702948	0.0654334	0.00330384	0.00430492	0.0796283	0.0125601	0.00871508	0.0065246	0.010081	0.0265617	0.0201351	0.00945261		3.9715	0.064003	0.331844	17.9382	0.074197	0.11795	39.0925	0.026695	-0.00011	0.033309	0.332927	0.756083	0.302348	0.015534	37.8369
OD306-2	30	h	3.87224	0.074125	0.313828	17.9245	0.07115	0.098851	39.0393	<0.025	0.037989	0.019835	0.325496	0.735763	0.271778	<0.020	37.8212	100.606		0.0290613	0.00781863	0.00687914	0.0653742	0.00333969	0.00406696	0.0795629	0.0123654	0.00918259	0.00650761	0.0101814	0.0272046	0.0202377	0.00952759		3.87224	0.074125	0.313828	17.9245	0.07115	0.098851	39.0393	0.025001	0.037989	0.019835	0.325496	0.735763	0.271778	0.009981	37.8212
OD306-3	30	h	3.81058	0.067019	0.253703	18.0665	0.042964	0.104783	39.152	<0.024	0.028481	0.02683	0.270951	0.57242	0.244403	<0.019	37.9166	100.557		0.0290596	0.0074763	0.00633225	0.0656569	0.00293102	0.00420234	0.0797272	0.0120837	0.00871558	0.0065623	0.00988744	0.025045	0.0193962	0.00932994		3.81058	0.067019	0.253703	18.0665	0.042964	0.104783	39.152	0.021314	0.028481	0.02683	0.270951	0.57242	0.244403	0.013107	37.9166
OD306-4	30	h	3.85111	0.095092	0.308003	17.9175	0.095723	0.10122	38.9391	0.055372	<0.018	0.036111	0.3719	0.773757	0.265218	<0.020	37.831	100.641		0.0291081	0.00792699	0.0067756	0.0653577	0.00363968	0.00421081	0.0794798	0.0124038	0.00887874	0.00654761	0.0103319	0.027166	0.0193978	0.00951677		3.85111	0.095092	0.308003	17.9175	0.095723	0.10122	38.9391	0.055372	0.006501	0.036111	0.3719	0.773757	0.265218	-0.00417	37.831
OD306-5	30	h	3.9992	0.017159	0.046125	18.6053	0.013951	0.088207	40.0156	<0.024	<0.018	0.028107	0.063851	0.18111	0.039454	<0.019	38.4371	101.535		0.0293952	0.00644906	0.00436463	0.0664991	0.0024789	0.00401116	0.0806562	0.011715	0.00891359	0.00646124	0.00892707	0.0188684	0.0167534	0.00930332		3.9992	0.017159	0.046125	18.6053	0.013951	0.088207	40.0156	0.014348	0.012969	0.028107	0.063851	0.18111	0.039454	-0.01205	38.4371
OD306-6	30	h	3.86029	0.065302	0.320753	17.9712	0.071975	0.106245	38.9622	0.061879	<0.019	0.02816	0.350596	0.792123	0.33395	<0.019	37.8876	100.812		0.0289619	0.00847032	0.00695104	0.0654871	0.00330002	0.0042455	0.0794926	0.0126585	0.00918188	0.00654264	0.0102048	0.0272613	0.020126	0.00949748		3.86029	0.065302	0.320753	17.9712	0.071975	0.106245	38.9622	0.061879	0.007459	0.02816	0.350596	0.792123	0.33395	0.016048	37.8876
OD306-7	30	h	3.63917	0.059704	0.188574	18.2308	0.045355	0.090797	39.4477	0.033812	<0.019	0.025571	0.23095	0.502498	0.178738	<0.019	38.2068	100.88		0.0285124	0.00751082	0.00572305	0.0659532	0.0029431	0.0040004	0.0800623	0.012327	0.00914507	0.00644474	0.00970325	0.024092	0.0189121	0.00940939		3.63917	0.059704	0.188574	18.2308	0.045355	0.090797	39.4477	0.033812	-0.01922	0.025571	0.23095	0.502498	0.178738	0.010406	38.2068
OD306-8	30	e	3.81134	0.082073	0.314249	18.0196	0.073194	0.116805	39.0584	0.032862	<0.020	0.025131	0.353566	0.756966	0.274849	<0.019	37.9772	100.896		0.0289645	0.00844424	0.00679152	0.0655946	0.00328262	0.00428361	0.0795991	0.0122959	0.00956314	0.00653906	0.0102088	0.0269662	0.0193906	0.00951916		3.81134	0.082073	0.314249	18.0196	0.073194	0.116805	39.0584	0.032862	-0.01122	0.025131	0.353566	0.756966	0.274849	0.019356	37.9772
OD306-9	30	h	3.75053	0.088589	0.319223	17.9479	0.073059	0.099454	39.0439	0.040145	<0.018	0.022857	0.343879	0.774164	0.294579	<0.019	37.9289	100.727		0.0286279	0.00804325	0.00684752	0.0654515	0.00329939	0.0042225	0.0795785	0.0124416	0.00906718	0.00656341	0.0102124	0.0266502	0.0201657	0.00949352		3.75053	0.088589	0.319223	17.9479	0.073059	0.099454	39.0439	0.040145	0.009869	0.022857	0.343879	0.774164	0.294579	0.017475	37.9289
OD306-10	30	h	3.82639	0.08344	0.313557	18.0456	0.067083	0.108365	39.0131	0.075602	<0.018	0.023778	0.364347	0.773101	0.28203	<0.020	38.0014	100.978		0.0289329	0.00803729	0.00680585	0.0656506	0.00319371	0.00420336	0.0795469	0.0126003	0.00887461	0.00657678	0.0101699	0.0269469	0.019715	0.00948968		3.82639	0.08344	0.313557	18.0456	0.067083	0.108365	39.0131	0.075602	0.010216	0.023778	0.364347	0.773101	0.28203	0.003898	38.0014
OD306-11	30	h	3.84095	0.082055	0.331272	17.9227	0.071483	0.100353	38.9249	0.030931	<0.021	0.019038	0.339212	0.747426	0.293241	<0.019	37.7884	100.492		0.0289053	0.00784063	0.00695135	0.0654553	0.00331134	0.00413477	0.0795314	0.0122197	0.00930416	0.00648849	0.0101387	0.0266723	0.0201134	0.00941326		3.84095	0.082055	0.331272	17.9227	0.071483	0.100353	38.9249	0.030931	-0.05611	0.019038	0.339212	0.747426	0.293241	0.00928	37.7884
OD306-12	30	h	3.75914	0.067931	0.255964	18.211	0.076747	0.108808	39.1358	<0.025	<0.018	0.024658	0.277968	0.606549	0.204459	0.028106	38.1691	100.926		0.0286116	0.00747995	0.00635402	0.0659369	0.00333337	0.00420182	0.0797525	0.0121672	0.00897012	0.00647854	0.00994075	0.0248442	0.0185655	0.00946978		3.75914	0.067931	0.255964	18.211	0.076747	0.108808	39.1358	0.023367	0.014484	0.024658	0.277968	0.606549	0.204459	0.028106	38.1691
Average			3.8327	0.070541	0.274758	18.0667	0.0647401	0.103486	39.152	0.0446623	0.033235	0.0261154	0.302137	0.66433	0.248754	0.028106	37.9835	100.828
1 s.d.			0.0914337	0.0192132	0.0799683	0.192239	0.020224	0.00863701	0.291892	0.0164208	0.004754	0.00473744	0.0825355	0.171436	0.0749938	0	0.186241	0.261877
Durango (perpendicular to C axis)-1	30	h	3.56676	0.137029	0.210766	17.8959	0.149753	0.501631	38.6448	0.037571	0.06507	0.050853	0.471174	0.52917	0.126144	0.033213	37.6732	100.093		0.0278914	0.00917768	0.0059803	0.065351	0.00415908	0.00745765	0.0793331	0.0117633	0.00965105	0.00674255	0.0106954	0.0239266	0.0178944	0.00973799		3.56676	0.137029	0.210766	17.8959	0.149753	0.501631	38.6448	0.037571	0.06507	0.050853	0.471174	0.52917	0.126144	0.033213	37.6732
Durango (perpendicular to C axis)-2	30	e	3.39164	0.144772	0.222033	17.835	0.141726	0.499234	38.4599	<0.024	0.081866	0.047103	0.482396	0.498215	0.123018	<0.020	37.592	99.5189		0.0272727	0.00936857	0.00607449	0.0652668	0.00410026	0.00740454	0.0791389	0.0121036	0.00979379	0.00676262	0.0106035	0.0238196	0.0176114	0.00960768		3.39164	0.144772	0.222033	17.835	0.141726	0.499234	38.4599	0.022474	0.081866	0.047103	0.482396	0.498215	0.123018	0.010561	37.592
Durango (perpendicular to C axis)-3	30	o	3.51834	0.138616	0.211401	17.772	0.144938	0.506872	38.5672	<0.024	0.063705	0.057032	0.483871	0.469014	0.082126	0.026779	37.4742	99.5161		0.0277209	0.00932273	0.00604131	0.0651333	0.00418062	0.00742035	0.0792178	0.011989	0.00991396	0.00674597	0.0106597	0.0231666	0.0180037	0.00965431		3.51834	0.138616	0.211401	17.772	0.144938	0.506872	38.5672	0.017444	0.063705	0.057032	0.483871	0.469014	0.082126	0.026779	37.4742
Durango (perpendicular to C axis)-4	30	h	3.40757	0.158064	0.216035	17.8877	0.142837	0.522606	38.5681	0.035267	0.070229	0.054234	0.454728	0.461589	0.122238	<0.020	37.6816	99.7828		0.027447	0.00942912	0.00608272	0.0653486	0.00406714	0.00753687	0.079222	0.0119409	0.0098487	0.00674931	0.0106719	0.023926	0.0177927	0.00961188		3.40757	0.158064	0.216035	17.8877	0.142837	0.522606	38.5681	0.035267	0.070229	0.054234	0.454728	0.461589	0.122238	0.016282	37.6816
Durango (perpendicular to C axis)-5	30	o	3.49888	0.159745	0.208259	17.8584	0.139538	0.5157	38.5415	<0.024	0.04432	0.045875	0.459126	0.518077	0.086915	0.036987	37.5766	99.6899		0.0277853	0.00929904	0.00600684	0.0653071	0.00411244	0.00750916	0.0792186	0.0120595	0.00986404	0.00680276	0.0106628	0.024284	0.0180731	0.00968109		3.49888	0.159745	0.208259	17.8584	0.139538	0.5157	38.5415	0.021458	0.04432	0.045875	0.459126	0.518077	0.086915	0.036987	37.5766
Durango (perpendicular to C axis)-6	30	e	3.48369	0.161413	0.203773	17.7584	0.14836	0.502606	38.1737	0.041131	0.065683	0.052843	0.481247	0.487155	0.116961	0.031282	37.3352	99.0434		0.0275087	0.00951431	0.00589165	0.0651703	0.00414834	0.00749029	0.0788199	0.0121077	0.00994263	0.00676501	0.010696	0.0236824	0.0181243	0.00953804		3.48369	0.161413	0.203773	17.7584	0.14836	0.502606	38.1737	0.041131	0.065683	0.052843	0.481247	0.487155	0.116961	0.031282	37.3352
Durango (parallel to C axis)-1	30	h	3.58679	0.100865	0.182939	18.033	0.090124	0.430125	38.7344	0.030487	0.06745	0.053906	0.396894	0.405944	0.11648	<0.020	37.722	99.9514		0.0281426	0.00906714	0.00571068	0.0656096	0.00350375	0.00693392	0.0794284	0.0120535	0.00990996	0.00674003	0.0103483	0.0232787	0.0173786	0.00960919		3.58679	0.100865	0.182939	18.033	0.090124	0.430125	38.7344	0.030487	0.06745	0.053906	0.396894	0.405944	0.11648	0.018786	37.722
Durango (parallel to C axis)-2	30	e	3.58973	0.126694	0.188799	17.8218	0.101541	0.431485	38.5089	0.028218	0.081246	0.063546	0.418621	0.440216	0.150343	0.024063	37.412	99.3872		0.0280793	0.00893547	0.00573175	0.0652558	0.00369529	0.00696615	0.0791832	0.0119071	0.0095083	0.00666877	0.0103867	0.0228365	0.0180518	0.00974641		3.58973	0.126694	0.188799	17.8218	0.101541	0.431485	38.5089	0.028218	0.081246	0.063546	0.418621	0.440216	0.150343	0.024063	37.412
Durango (parallel to C axis)-3	30	e	3.48838	0.139918	0.185616	17.9044	0.117295	0.44614	38.4565	<0.024	0.080268	0.061148	0.412526	0.475598	0.107178	0.040798	37.5589	99.4747		0.027649	0.00931209	0.00579291	0.065393	0.00387717	0.00707596	0.0791769	0.0120352	0.0096674	0.00674646	0.0103807	0.023398	0.0178327	0.00965399		3.48838	0.139918	0.185616	17.9044	0.117295	0.44614	38.4565	0.021044	0.080268	0.061148	0.412526	0.475598	0.107178	0.040798	37.5589
Durango (parallel to C axis)-4	30	e	3.58174	0.135079	0.178753	17.9303	0.109469	0.434664	38.4189	<0.025	0.054974	0.058049	0.400242	0.471909	0.134737	0.02526	37.5071	99.4412		0.02811	0.0089963	0.00571509	0.0653595	0.00379122	0.00698901	0.0790922	0.0119704	0.00991973	0.00671325	0.0104211	0.0238644	0.0175374	0.0095599		3.58174	0.135079	0.178753	17.9303	0.109469	0.434664	38.4189	0.009204	0.054974	0.058049	0.400242	0.471909	0.134737	0.02526	37.5071
Durango (parallel to C axis)-5	30	h	3.51809	0.163453	0.192198	17.8515	0.115735	0.433179	38.4417	0.039203	0.087172	0.060735	0.425372	0.525532	0.141841	<0.019	37.509	99.5047		0.027954	0.00924855	0.00578128	0.0653501	0.00387599	0.00691115	0.079138	0.0115699	0.0098296	0.00675713	0.0104656	0.0236731	0.0176825	0.00949304		3.51809	0.163453	0.192198	17.8515	0.115735	0.433179	38.4417	0.039203	0.087172	0.060735	0.425372	0.525532	0.141841	0.016076	37.509
Average			3.51196	0.142332	0.200052	17.868	0.127392	0.474931	38.5014	0.0353128	0.0692712	0.0550295	0.4442	0.48022	0.118907	0.0311974	37.5493	99.5821
1 s.d.			0.0650166	0.0176616	0.0141634	0.0728721	0.0201253	0.0370668	0.13711	0.00461359	0.0121958	0.00544727	0.0325417	0.035592	0.0199288	0.00579945	0.112442	0.273566
OtterLake-1	30	e	4.06174	0.048906	0.504312	17.1349	0.261108	0.038131	38.9554	<0.025	<0.018	0.163752	0.297651	0.673765	0.309437	0.083651	37.2123	99.7451		0.0294701	0.00758997	0.00809633	0.0642245	0.00514458	0.00329597	0.0795789	0.0121931	0.00895904	0.00764543	0.0099928	0.025936	0.020343	0.0101829		4.06174	0.048906	0.504312	17.1349	0.261108	0.038131	38.9554	0.017063	0.01557	0.163752	0.297651	0.673765	0.309437	0.083651	37.2123
OtterLake-2	30	h	4.19008	0.057042	0.49913	17.1048	0.268991	0.033745	38.9784	<0.024	<0.018	0.182418	0.275913	0.671374	0.343947	0.103542	37.1453	99.8547		0.0299683	0.00713236	0.00812109	0.0640443	0.00523373	0.00336881	0.0795783	0.0117287	0.00882898	0.00761608	0.0100187	0.0258783	0.0203825	0.0103636		4.19008	0.057042	0.49913	17.1048	0.268991	0.033745	38.9784	0.02033	0.010235	0.182418	0.275913	0.671374	0.343947	0.103542	37.1453
OtterLake-3	30	e	4.12312	0.06674	0.524799	16.994	0.261709	0.042898	39.2924	<0.024	<0.018	0.183274	0.278071	0.685859	0.331945	0.091108	37.1742	100.05		0.0298581	0.00759074	0.0082152	0.0638487	0.00516425	0.00336834	0.079927	0.0120457	0.00900074	0.00757558	0.0100255	0.0262999	0.0205006	0.0102524		4.12312	0.06674	0.524799	16.994	0.261709	0.042898	39.2924	0.022441	0.006828	0.183274	0.278071	0.685859	0.331945	0.091108	37.1742
OtterLake-4	30	h	4.21739	0.070567	0.503439	17.1269	0.255586	0.036481	38.8927	0.031784	<0.018	0.186137	0.290494	0.653884	0.312298	0.093259	37.1124	99.7833		0.0300678	0.00766315	0.00816049	0.064093	0.00513275	0.0033796	0.079543	0.0120286	0.00892582	0.00767058	0.0100035	0.0258711	0.02071	0.0102407		4.21739	0.070567	0.503439	17.1269	0.255586	0.036481	38.8927	0.031784	0.006082	0.186137	0.290494	0.653884	0.312298	0.093259	37.1124
OtterLake-5	30	h	3.94655	0.024163	0.515274	16.9537	0.2562	0.033646	39.0245	<0.025	<0.019	0.188086	0.307174	0.678915	0.309811	0.116578	37.0557	99.4103		0.0293009	0.00855087	0.00820337	0.0637824	0.00517201	0.00338475	0.0796592	0.0120059	0.00916794	0.00761998	0.010076	0.02558	0.020609	0.0101509		3.94655	0.024163	0.515274	16.9537	0.2562	0.033646	39.0245	0.010159	-0.00279	0.188086	0.307174	0.678915	0.309811	0.116578	37.0557
OtterLake-6	30	h	4.14117	0.0445	0.509583	16.987	0.220907	0.038704	38.7512	<0.024	<0.018	0.185842	0.31294	0.720052	0.31362	0.086045	36.8625	99.1741		0.0299013	0.00788874	0.00817407	0.0637875	0.00491019	0.00338535	0.0793683	0.0117024	0.00858315	0.00768249	0.0101249	0.0269705	0.0203102	0.0102917		4.14117	0.0445	0.509583	16.987	0.220907	0.038704	38.7512	0.017381	0.004001	0.185842	0.31294	0.720052	0.31362	0.086045	36.8625
OtterLake-7	30	h	3.97016	0.049378	0.492197	16.982	0.210774	0.034047	38.6329	<0.024	<0.018	0.189648	0.352479	0.759754	0.320902	0.080555	36.8615	98.9363		0.0294983	0.00800294	0.00805663	0.0639231	0.00478189	0.00329124	0.0792701	0.0117549	0.00883548	0.00770083	0.0102444	0.0269299	0.0205413	0.0103363		3.97016	0.049378	0.492197	16.982	0.210774	0.034047	38.6329	0.016079	-0.00081	0.189648	0.352479	0.759754	0.320902	0.080555	36.8615
OtterLake-8	30	h	4.04758	0.061166	0.51746	16.8651	0.258617	0.029071	38.6548	<0.025	<0.018	0.184311	0.343482	0.826291	0.362413	0.109696	36.812	99.072		0.0294219	0.00861101	0.00824143	0.0636792	0.0051403	0.00327153	0.0792404	0.0120702	0.0090672	0.00766697	0.0101523	0.0275865	0.0203897	0.0102438		4.04758	0.061166	0.51746	16.8651	0.258617	0.029071	38.6548	-0.00112	0.014435	0.184311	0.343482	0.826291	0.362413	0.109696	36.812
OtterLake-9	30	e	4.11178	0.051252	0.496153	17.0874	0.260329	0.038257	38.9856	0.027901	<0.018	0.187229	0.28854	0.663114	0.31895	0.114515	37.1372	99.7682		0.0296464	0.00785575	0.00809285	0.0640467	0.00519122	0.00332145	0.079641	0.0122502	0.00876644	0.00768764	0.010043	0.0258843	0.0205411	0.0103741		4.11178	0.051252	0.496153	17.0874	0.260329	0.038257	38.9856	0.027901	0.000141	0.187229	0.28854	0.663114	0.31895	0.114515	37.1372
OtterLake-10	30	e	4.16024	0.043008	0.523346	16.9901	0.261878	0.029958	38.7578	0.025441	<0.018	0.187964	0.28603	0.671861	0.297507	0.089956	36.9272	99.2523		0.0298575	0.00777086	0.00830267	0.0637866	0.00517159	0.00330449	0.0793806	0.0118269	0.00897438	0.00763951	0.00998365	0.0259795	0.019871	0.0103054		4.16024	0.043008	0.523346	16.9901	0.261878	0.029958	38.7578	0.025441	0.004054	0.187964	0.28603	0.671861	0.297507	0.089956	36.9272
OtterLake-11	30	h	4.05238	0.041303	0.494135	16.9776	0.265485	0.036775	38.8428	<0.025	<0.018	0.172236	0.283313	0.677617	0.307172	0.091797	36.9501	99.1927		0.0295425	0.0074416	0.00807258	0.0637692	0.00520361	0.00329809	0.0794514	0.0121278	0.00889856	0.00759585	0.009981	0.0261226	0.0203312	0.0104294		4.05238	0.041303	0.494135	16.9776	0.265485	0.036775	38.8428	-0.00287	-0.00137	0.172236	0.283313	0.677617	0.307172	0.091797	36.9501
OtterLake-12	30	h	4.12235	0.085924	0.507982	17.0537	0.232385	0.03204	38.3639	<0.024	0.020605	0.205514	0.36679	0.855528	0.387511	0.077218	36.8859	99.1973		0.0296852	0.00787011	0.00812756	0.0640135	0.00491852	0.00331681	0.0789414	0.0119839	0.00898011	0.00776233	0.010318	0.027747	0.021398	0.0100973		4.12235	0.085924	0.507982	17.0537	0.232385	0.03204	38.3639	0.017884	0.020605	0.205514	0.36679	0.855528	0.387511	0.077218	36.8859
Average			4.09538	0.0536624	0.507317	17.0214	0.251164	0.0353127	38.8444	0.0283753	0.020605	0.184701	0.306906	0.711501	0.326293	0.0948267	37.0114	99.453
1 s.d.			0.0790674	0.0153638	0.0106161	0.0773331	0.0181009	0.00381152	0.226097	0.00261115	0	0.00953568	0.0296002	0.0641976	0.0251419	0.0126582	0.13656	0.350815
McClure-1	30	h	3.08215	<0.012	0.147512	18.3621	<0.004	0.00899	39.7267	<0.024	<0.018	0.389931	0.155565	0.265308	0.053345	<0.019	38.6014	100.793		0.0265406	0.00631307	0.00551367	0.0661875	0.00228139	0.00296407	0.080416	0.0116771	0.00861158	0.00877856	0.00938805	0.0209678	0.017154	0.00943245		3.08215	0.011513	0.147512	18.3621	0.004301	0.00899	39.7267	-0.00219	-0.00649	0.389931	0.155565	0.265308	0.053345	0.009383	38.6014
McClure-2	30	e	3.19505	0.015628	0.161109	18.1869	0.006233	0.013111	39.3407	<0.024	<0.019	0.34103	0.210335	0.291552	0.086719	<0.019	38.2071	100.055		0.0268709	0.00709949	0.00557922	0.0658742	0.00232856	0.00302871	0.0800627	0.0116892	0.00903743	0.00855856	0.00966168	0.0214941	0.0170902	0.00942385		3.19505	0.015628	0.161109	18.1869	0.006233	0.013111	39.3407	-0.0014	0.005005	0.34103	0.210335	0.291552	0.086719	0.010322	38.2071
McClure-3	30	h	2.97071	0.050088	0.233912	18.2312	<0.004	0.010403	39.4248	<0.024	<0.018	0.363106	0.180742	0.294052	0.127516	<0.020	38.4917	100.378		0.0261391	0.00740145	0.00621336	0.0660177	0.00237188	0.00302618	0.0801305	0.0118816	0.0088308	0.0087226	0.00935944	0.0207445	0.0175322	0.00941953		2.97071	0.050088	0.233912	18.2312	0.002372	0.010403	39.4248	0.01505	0.005625	0.363106	0.180742	0.294052	0.127516	-0.00017	38.4917
McClure-4	30	o	3.25185	<0.012	0.150325	18.3582	<0.004	0.013682	39.6866	<0.024	<0.019	0.367615	0.180605	0.286716	0.104878	<0.019	38.5202	100.921		0.0268736	0.00607366	0.0054206	0.0662133	0.00237489	0.00296846	0.0804138	0.0115885	0.00896396	0.00876784	0.00951014	0.0206754	0.0175078	0.00935281		3.25185	0.002404	0.150325	18.3582	0.002871	0.013682	39.6866	0.007891	-0.00908	0.367615	0.180605	0.286716	0.104878	0.008012	38.5202
McClure-5	30	o	3.19354	<0.013	0.158699	18.3496	0.005489	0.015649	39.6426	<0.024	<0.018	0.374134	0.210145	0.324686	0.104485	<0.019	38.5473	100.926		0.0267206	0.006428	0.00555585	0.0661898	0.00226972	0.00312291	0.0803441	0.0117093	0.00911901	0.00872323	0.0096022	0.0212058	0.0175588	0.00945657		3.19354	0.001093	0.158699	18.3496	0.005489	0.015649	39.6426	0.008009	0.011484	0.374134	0.210145	0.324686	0.104485	0.003909	38.5473
McClure-6	30	o	3.07146	0.020509	0.151507	18.2586	0.004827	0.050219	39.3003	<0.024	<0.019	0.40589	0.177034	0.378522	0.143136	<0.020	38.3456	100.308		0.0262823	0.00686139	0.00550545	0.0660202	0.00225663	0.00353994	0.0799914	0.0121114	0.00913697	0.00891302	0.00964692	0.0217913	0.0181041	0.00950848		3.07146	0.020509	0.151507	18.2586	0.004827	0.050219	39.3003	0.023054	-0.0093	0.40589	0.177034	0.378522	0.143136	-0.01167	38.3456
McClure-7	30	e	3.40904	0.013453	0.109148	18.3442	<0.004	0.007218	39.4588	<0.024	<0.019	0.38342	0.157908	0.250901	0.114753	<0.019	38.2946	100.543		0.0275237	0.00625963	0.00504321	0.0662556	0.00218934	0.0029679	0.080172	0.0114394	0.00897121	0.00878779	0.00947022	0.0204393	0.017475	0.00941696		3.40904	0.013453	0.109148	18.3442	0.001195	0.007218	39.4588	0.005501	-0.00626	0.38342	0.157908	0.250901	0.114753	0.000732	38.2946
McClure-8	30	e	3.11463	0.013886	0.113619	18.4207	<0.004	0.018937	39.432	<0.025	<0.019	0.385711	0.155165	0.223039	0.047004	<0.020	38.4942	100.419		0.0265318	0.00622114	0.00513883	0.0662593	0.00230609	0.00318464	0.0801475	0.0117592	0.00910528	0.00871302	0.00946863	0.020354	0.0173731	0.00953883		3.11463	0.013886	0.113619	18.4207	0.003925	0.018937	39.432	-0.00237	-0.00557	0.385711	0.155165	0.223039	0.047004	-0.00618	38.4942
McClure-9	30	e	3.12635	<0.015	0.127019	18.3256	<0.004	0.044908	39.2571	<0.025	<0.019	0.378973	0.172749	0.240453	0.086412	<0.020	38.3019	100.061		0.0264615	0.00696434	0.00519735	0.066156	0.00231186	0.00335059	0.0800338	0.0121092	0.0089172	0.0087611	0.0094573	0.0208019	0.0170621	0.00941952		3.12635	-0.00826	0.127019	18.3256	-0.00241	0.044908	39.2571	-0.00012	-0.00421	0.378973	0.172749	0.240453	0.086412	-0.00176	38.3019
Average			3.1572	0.0227128	0.150317	18.3152	0.00551633	0.0203463	39.4744	#DIV/0!	#DIV/0!	0.376646	0.177805	0.283914	0.096472	#DIV/0!	38.4227	100.489
1 s.d.			0.118163	0.0139148	0.0345906	0.0699459	0.000574322	0.0149691	0.162235	#DIV/0!	#DIV/0!	0.0173362	0.01986	0.044488	0.0300253	#DIV/0!	0.129215	0.315137
EmeraldLake-1	30	e	3.73211	<0.014	0.111256	18.4037	<0.004	0.057405	39.6038	<0.024	<0.018	0.053739	0.101341	0.195481	0.120742	<0.020	38.2034	100.583		0.0285852	0.00649432	0.00513065	0.0662292	0.00221884	0.00359879	0.0803446	0.0117891	0.00864164	0.00668588	0.00917764	0.0204821	0.0176247	0.00955288		3.73211	-0.01985	0.111256	18.4037	0.002555	0.057405	39.6038	0.024149	-0.00561	0.053739	0.101341	0.195481	0.120742	0.012064	38.2034
EmeraldLake-2	30	e	3.73285	<0.013	0.093178	18.3824	<0.004	0.043959	39.8594	0.030273	<0.019	0.048411	0.076769	0.153258	0.090865	<0.020	38.2468	100.758		0.0287572	0.00625211	0.00495718	0.0661255	0.00221176	0.00354318	0.0805706	0.0124102	0.00920136	0.00665874	0.00909436	0.0193973	0.0173969	0.00965367		3.73285	-0.00472	0.093178	18.3824	0.002407	0.043959	39.8594	0.030273	-0.0084	0.048411	0.076769	0.153258	0.090865	-0.00037	38.2468
EmeraldLake-3	30	h	4.02182	<0.014	0.161562	18.2436	<0.004	0.048473	39.5052	<0.026	<0.017	0.057713	0.161282	0.320511	0.160618	<0.020	37.9248	100.606		0.0295302	0.00622604	0.0055589	0.0659056	0.00225389	0.0035753	0.0802098	0.0122647	0.0087374	0.00677377	0.00939134	0.0218971	0.0184626	0.00967413		4.02182	-0.0182	0.161562	18.2436	-0.00114	0.048473	39.5052	-0.01117	0.016334	0.057713	0.161282	0.320511	0.160618	0.005881	37.9248
EmeraldLake-4	30	h	3.70976	<0.014	0.12559	18.3196	<0.004	0.03257	39.8547	0.024745	<0.018	0.052835	0.116141	0.239188	0.117639	<0.019	38.2318	100.825		0.0286454	0.00638834	0.00514729	0.0660777	0.00226418	0.00338461	0.0805719	0.012024	0.00878425	0.00667908	0.00915642	0.020432	0.017951	0.00938562		3.70976	-0.01078	0.12559	18.3196	-0.00328	0.03257	39.8547	0.024745	0.00079	0.052835	0.116141	0.239188	0.117639	0.008333	38.2318
EmeraldLake-5	30	h	3.68936	<0.012	0.099472	18.3916	<0.004	0.033881	39.7945	<0.024	<0.018	0.050439	0.059337	0.182249	0.093869	0.033158	38.271	100.699		0.028649	0.00605019	0.00498983	0.0661597	0.00221555	0.00329784	0.080509	0.0119757	0.00857817	0.0066701	0.00900463	0.0197788	0.0177117	0.00942539		3.68936	0.006608	0.099472	18.3916	0.000365	0.033881	39.7945	0.02234	0.005229	0.050439	0.059337	0.182249	0.093869	0.033158	38.271
EmeraldLake-6	30	h	3.98319	<0.016	0.111199	18.358	<0.004	0.033121	39.8639	<0.024	<0.018	0.040624	0.088681	0.217822	0.135247	<0.019	38.1456	100.977		0.0295534	0.00713502	0.00509522	0.066118	0.00219972	0.00327793	0.0805817	0.0119655	0.00874868	0.00667355	0.00909291	0.0201846	0.0177195	0.00933888		3.98319	-0.03258	0.111199	18.358	-0.00119	0.033121	39.8639	0.022684	0.012736	0.040624	0.088681	0.217822	0.135247	0.017043	38.1456
EmeraldLake-7	30	d	3.85503	<0.013	0.090979	18.3891	<0.004	0.032759	39.834	0.036951	<0.018	0.053821	0.088752	0.174423	0.09763	<0.019	38.2125	100.866		0.02905	0.00621265	0.00488058	0.0661655	0.00219095	0.00326314	0.0805412	0.011627	0.00876588	0.00668694	0.00911403	0.019246	0.0176875	0.00941471		3.85503	-0.00115	0.090979	18.3891	0.002058	0.032759	39.834	0.036951	0.017711	0.053821	0.088752	0.174423	0.09763	-0.00159	38.2125
Average			3.81773	#DIV/0!	0.113319	18.3554	#DIV/0!	0.0403097	39.7594	0.0306563	#DIV/0!	0.0510831	0.0989004	0.211847	0.116659	0.033158	38.1766	100.759
1 s.d.			0.127107	#DIV/0!	0.0226249	0.0525026	#DIV/0!	0.00911927	0.133966	0.00499045	#DIV/0!	0.00505007	0.0303719	0.0515034	0.0234288	0	0.109059	0.131783
Kovdor-1	30	h	0.871778	0.107061	0.347157	17.8967	0.015236	0.012762	38.4905	<0.024	<0.018	0.278697	0.301918	0.618655	0.26465	0.247697	38.8569	98.3097		0.01669	0.00868124	0.00706062	0.0655105	0.00245482	0.00297036	0.0791823	0.0118767	0.00869831	0.00822989	0.0100761	0.0254431	0.0200109	0.0114449		0.871778	0.107061	0.347157	17.8967	0.015236	0.012762	38.4905	0.009609	0.012317	0.278697	0.301918	0.618655	0.26465	0.247697	38.8569
Kovdor-2	30	h	0.864584	0.094364	0.360058	17.8847	0.019561	0.015202	38.5253	<0.024	<0.018	0.258334	0.301002	0.651543	0.308855	0.24912	38.8821	98.4147		0.0167493	0.00835045	0.00715504	0.0653752	0.00249786	0.00312813	0.0791834	0.0117087	0.00898677	0.00812869	0.0101074	0.0256338	0.0203748	0.0115249		0.864584	0.094364	0.360058	17.8847	0.019561	0.015202	38.5253	0.012837	0.004039	0.258334	0.301002	0.651543	0.308855	0.24912	38.8821
Kovdor-3	30	e	0.9044	0.119965	0.283977	17.9061	0.012802	0.014829	38.2817	<0.024	<0.018	0.281099	0.331996	0.63848	0.296926	0.227943	38.7118	98.012		0.0166392	0.00931311	0.00657665	0.065483	0.00241307	0.00307579	0.0789338	0.0119227	0.00858009	0.0081512	0.0100667	0.0257925	0.0204817	0.0113125		0.9044	0.119965	0.283977	17.9061	0.012802	0.014829	38.2817	0.017316	0.004994	0.281099	0.331996	0.63848	0.296926	0.227943	38.7118
Kovdor-4	30	h	0.842336	0.080046	0.381657	17.7517	0.020905	0.015759	38.704	<0.025	<0.019	0.278095	0.312323	0.606581	0.272022	0.241244	38.7988	98.3055		0.0164523	0.00819119	0.00728411	0.0651722	0.00248544	0.00304743	0.079385	0.0119582	0.00913069	0.00823656	0.0102178	0.0251451	0.0198913	0.0113159		0.842336	0.080046	0.381657	17.7517	0.020905	0.015759	38.704	0.006868	-0.0047	0.278095	0.312323	0.606581	0.272022	0.241244	38.7988
Kovdor-5	30	h	0.877027	0.120851	0.54646	17.3754	0.017599	0.008254	38.2777	<0.025	<0.019	0.288306	0.392977	0.779595	0.331853	0.301324	38.3833	97.7006		0.0167158	0.00877285	0.00834412	0.0647004	0.00260456	0.003059	0.078911	0.0117656	0.00880255	0.00818429	0.0103738	0.0268219	0.0206245	0.0117411		0.877027	0.120851	0.54646	17.3754	0.017599	0.008254	38.2777	-0.00387	-0.01709	0.288306	0.392977	0.779595	0.331853	0.301324	38.3833
Kovdor-6	30	h	0.888633	0.138543	0.227813	17.9516	0.013464	0.016523	38.6283	<0.024	<0.019	0.260282	0.328617	0.6428	0.301344	0.176254	38.8426	98.4168		0.0168042	0.00993683	0.00616189	0.0655566	0.0023386	0.00295631	0.0793344	0.0116302	0.00913559	0.00809964	0.0101288	0.0253199	0.0199474	0.011082		0.888633	0.138543	0.227813	17.9516	0.013464	0.016523	38.6283	-0.00655	0.00747	0.260282	0.328617	0.6428	0.301344	0.176254	38.8426
Kovdor-7	30	h	0.855436	0.112279	0.323523	17.9236	0.011425	0.012483	38.5833	<0.024	<0.019	0.280822	0.328308	0.712438	0.267498	0.204745	38.9158	98.5317		0.0165593	0.00858755	0.00691624	0.0655163	0.00234163	0.00304812	0.0792729	0.0119058	0.00916984	0.00824232	0.0101904	0.0265305	0.0200422	0.0110708		0.855436	0.112279	0.323523	17.9236	0.011425	0.012483	38.5833	0.016996	-0.0083	0.280822	0.328308	0.712438	0.267498	0.204745	38.9158
Kovdor-8	30	o	0.918875	0.11463	0.281204	17.8091	0.011513	0.016135	38.6327	<0.024	<0.019	0.274324	0.276287	0.597587	0.253234	0.165188	38.6677	98.0185		0.0168278	0.00906649	0.00659263	0.0653656	0.00239539	0.00303373	0.0793404	0.0117045	0.00889148	0.00817121	0.00997333	0.0250131	0.0195003	0.0108555		0.918875	0.11463	0.281204	17.8091	0.011513	0.016135	38.6327	-0.00081	-0.01576	0.274324	0.276287	0.597587	0.253234	0.165188	38.6677
Average			0.877884	0.110967	0.343981	17.8124	0.0153131	0.0139934	38.5154	#DIV/0!	#DIV/0!	0.274995	0.321678	0.65596	0.287048	0.226689	38.7574	98.2137
1 s.d.			0.023668	0.0165879	0.089541	0.175898	0.00342469	0.00257391	0.149383	#DIV/0!	#DIV/0!	0.00978661	0.032109	0.0572396	0.0250949	0.0411338	0.16186	0.260384
EMPA apatite reference materials analyzed:
Apatite Durango perpendicular c	30	h	3.52469	0.09247	0.201912	18.0013	0.077575	0.369165	38.8031	<0.024	0.064451	0.066781	0.374095	0.462546	0.150023	0.025414	37.7601	99.9736		0.0281283	0.00887353	0.00593775	0.0655658	0.0034389	0.00652577	0.0794804	0.0119819	0.0100043	0.00675149	0.0103649	0.0234502	0.0184216	0.00970093		3.52469	0.09247	0.201912	18.0013	0.077575	0.369165	38.8031	0.024057	0.064451	0.066781	0.374095	0.462546	0.150023	0.025414	37.7601
Apatite Durango perpendicular c	30	h	3.46612	0.090295	0.195676	17.9671	0.085245	0.370105	38.5983	<0.025	0.067287	0.040351	0.36517	0.472039	0.118452	<0.020	37.6486	99.4847		0.0279168	0.00869539	0.00594513	0.0655129	0.00346822	0.00656415	0.0793265	0.0123027	0.0100589	0.00683114	0.0103357	0.02366	0.0181908	0.0097346		3.46612	0.090295	0.195676	17.9671	0.085245	0.370105	38.5983	0.016388	0.067287	0.040351	0.36517	0.472039	0.118452	0.008261	37.6486
Apatite Durango perpendicular c	30	h	3.46564	0.120773	0.193076	18.1549	0.078615	0.37984	38.7781	<0.024	0.080969	0.052461	0.391079	0.466619	0.131893	0.036887	37.9748	100.306		0.0279846	0.00843127	0.00590977	0.0658137	0.00337953	0.00662335	0.0794567	0.011913	0.00983968	0.00685225	0.0104138	0.023784	0.0180488	0.00962006		3.46564	0.120773	0.193076	18.1549	0.078615	0.37984	38.7781	0.015519	0.080969	0.052461	0.391079	0.466619	0.131893	0.036887	37.9748
Apatite Magnet Cove	30	h	1.08253	0.106718	1.23093	15.8687	0.52884	0.01519	38.5436	<0.024	<0.020	0.310374	0.329548	0.320656	0.078859	<0.020	37.8301	96.246		0.0179532	0.00865382	0.0118005	0.0618425	0.00704637	0.0030467	0.0792665	0.0115142	0.00932185	0.00843919	0.0100802	0.0219504	0.0175354	0.00941385		1.08253	0.106718	1.23093	15.8687	0.52884	0.01519	38.5436	0.008626	-0.0136	0.310374	0.329548	0.320656	0.078859	-0.00964	37.8301
Apatite Magnet Cove	30	h	1.11971	0.076063	1.23406	15.9073	0.594681	0.01069	38.9171	<0.025	0.022605	0.322393	0.318446	0.389865	0.081228	<0.020	38.1275	97.1216		0.0182349	0.00807652	0.0118598	0.0619535	0.00739736	0.00297085	0.0796458	0.011929	0.00915243	0.00842377	0.0102153	0.022769	0.0174371	0.00950888		1.11971	0.076063	1.23406	15.9073	0.594681	0.01069	38.9171	-0.00311	0.022605	0.322393	0.318446	0.389865	0.081228	-0.00251	38.1275
Apatite Magnet Cove	30	h	1.04266	0.09431	1.30213	15.5345	0.5307	0.0235	38.6634	<0.024	<0.019	0.285692	0.308774	0.338059	0.086226	<0.019	37.54	95.75		0.0174441	0.00801172	0.012126	0.0611227	0.00704032	0.0031005	0.0793783	0.0116771	0.00884922	0.00823259	0.00998019	0.0216692	0.0170826	0.00927213		1.04266	0.09431	1.30213	15.5345	0.5307	0.0235	38.6634	0.010004	-0.01059	0.285692	0.308774	0.338059	0.086226	0.003091	37.54
Apatite Snarum (REE phosphates block)	30	o	0.147657	0.256808	0.050725	17.968	0.027678	5.98671	37.4613	0.064324	<0.021	0.030698	0.08532	0.271657	0.166819	<0.020	35.5717	98.0894		0.0111797	0.011015	0.00436018	0.0649374	0.00274882	0.0238112	0.0782499	0.0129518	0.00952754	0.00669413	0.00918734	0.0210739	0.0182607	0.00968781		0.147657	0.256808	0.050725	17.968	0.027678	5.98671	37.4613	0.064324	-0.03383	0.030698	0.08532	0.271657	0.166819	-0.00142	35.5717
Apatite Snarum (REE phosphates block)	30	o	0.17084	0.27724	0.040539	17.843	0.030981	5.93071	37.2304	0.107285	<0.023	0.038506	0.105618	0.287254	0.222697	<0.019	35.3516	97.6367		0.0113905	0.0114184	0.00428655	0.064741	0.00271159	0.0237328	0.0780599	0.0134407	0.0104311	0.00655364	0.00930327	0.0206171	0.0188589	0.00955173		0.17084	0.27724	0.040539	17.843	0.030981	5.93071	37.2304	0.107285	-0.04029	0.038506	0.105618	0.287254	0.222697	0.019819	35.3516
Apatite Snarum (REE phosphates block)	30	o	0.200645	0.333793	0.045203	17.9365	0.032338	5.91253	37.1274	0.120362	<0.019	0.043471	0.115751	0.300673	0.190219	<0.021	35.463	97.8219		0.0114109	0.0121724	0.00432562	0.0648953	0.00285089	0.0237074	0.077933	0.0128931	0.00931355	0.00657916	0.00934906	0.0210115	0.0190044	0.00990067		0.200645	0.333793	0.045203	17.9365	0.032338	5.91253	37.1274	0.120362	0.000786	0.043471	0.115751	0.300673	0.190219	-0.00354	35.463
Apatite Snarum (REE phosphates block)	30	o	0.169747	0.284495	0.045601	17.8278	0.030973	5.88389	37.3194	0.082014	<0.019	0.033788	0.116277	0.281785	0.19575	<0.020	35.3822	97.6537		0.0113354	0.0112894	0.00435544	0.064857	0.00270573	0.023706	0.0783013	0.0133298	0.00887511	0.00664154	0.00926803	0.0209143	0.019105	0.009673		0.169747	0.284495	0.045601	17.8278	0.030973	5.88389	37.3194	0.082014	-0.01212	0.033788	0.116277	0.281785	0.19575	0.006077	35.3822
Apatite Snarum (REE phosphates block)	30	o	0.14248	0.301574	0.039708	17.7141	0.024398	5.93942	37.1678	0.107907	<0.018	0.031998	0.102001	0.268245	0.18064	<0.020	35.1649	97.1852		0.011344	0.0111895	0.00433234	0.0645365	0.00276432	0.0238127	0.0780721	0.0132101	0.00883656	0.00663667	0.0093266	0.021487	0.0186829	0.00969985		0.14248	0.301574	0.039708	17.7141	0.024398	5.93942	37.1678	0.107907	-0.0054	0.031998	0.102001	0.268245	0.18064	0.004441	35.1649
Apatite Snarum (REE phosphates block)	30	o	0.183342	0.336474	0.047574	17.7393	0.031169	5.91591	37.0004	0.124962	<0.019	0.024618	0.122806	0.316666	0.209392	<0.020	35.165	97.2176		0.0112196	0.0121736	0.00441736	0.064659	0.00279607	0.0237568	0.0779291	0.0132144	0.00895294	0.00671599	0.00935814	0.0213366	0.0187745	0.00966172		0.183342	0.336474	0.047574	17.7393	0.031169	5.91591	37.0004	0.124962	-0.02635	0.024618	0.122806	0.316666	0.209392	0.015707	35.165
Apatite Wilberforce (REE phosphates block)	30	h	3.7917	0.145429	0.073864	18.0313	0.158228	0.006536	37.8801	<0.024	<0.019	0.416714	0.125935	0.199823	0.114606	<0.020	35.792	96.7362		0.0290261	0.0100329	0.00473732	0.0654962	0.00424962	0.00282309	0.0784353	0.0115409	0.00921072	0.00887367	0.00914108	0.019779	0.0179066	0.00939269		3.7917	0.145429	0.073864	18.0313	0.158228	0.006536	37.8801	0.011731	0.015735	0.416714	0.125935	0.199823	0.114606	-0.01022	35.792
Apatite Wilberforce (REE phosphates block)	30	h	3.81907	0.161612	0.081333	18.0114	0.141889	<0.006	38.9625	0.035579	<0.020	0.414182	0.106198	0.23935	0.104287	0.028781	36.1874	98.2936		0.0291439	0.00953537	0.0047294	0.0655033	0.0040371	0.00290364	0.0795536	0.0118707	0.00968675	0.00888541	0.00916033	0.0197128	0.0174902	0.00946777		3.81907	0.161612	0.081333	18.0114	0.141889	0.003543	38.9625	0.035579	0.005487	0.414182	0.106198	0.23935	0.104287	0.028781	36.1874
Apatite Wilberforce (REE phosphates block)	30	h	3.70385	0.166337	0.077332	18.0817	0.134619	<0.006	38.8976	<0.024	<0.018	0.410184	0.124898	0.221131	0.101655	<0.020	36.2823	98.2016		0.0286772	0.00975628	0.00465017	0.0656281	0.00405281	0.0028292	0.0794993	0.0118908	0.0088779	0.0088523	0.00918993	0.0197328	0.0176528	0.00951716		3.70385	0.166337	0.077332	18.0817	0.134619	-0.00252	38.8976	0.023101	0.012329	0.410184	0.124898	0.221131	0.101655	0.002127	36.2823
Apatite Wilberforce (REE phosphates block)	30	h	3.76397	0.159089	0.078831	17.9829	0.158416	<0.006	38.7869	<0.025	<0.018	0.414841	0.120426	0.216383	0.121593	<0.020	36.1088	97.9121		0.0288042	0.00945273	0.00477538	0.0655137	0.00422914	0.00288938	0.0794775	0.0117762	0.00876472	0.00893464	0.00921473	0.020716	0.0176241	0.00958014		3.76397	0.159089	0.078831	17.9829	0.158416	9.4e-05	38.7869	-0.00414	-0.01079	0.414841	0.120426	0.216383	0.121593	0.016665	36.1088
Apatite Wilberforce (REE phosphates block)	30	h	3.71777	0.163087	0.079223	17.954	0.141673	<0.005	38.8815	<0.024	<0.019	0.402404	0.10639	0.216376	0.107311	<0.020	36.0961	97.8658		0.0287685	0.00945821	0.00469947	0.0654402	0.00408789	0.00284136	0.0795768	0.0112991	0.00909214	0.00895437	0.00921105	0.0203863	0.0178179	0.00954021		3.71777	0.163087	0.079223	17.954	0.141673	0.001595	38.8815	-0.01178	0.000472	0.402404	0.10639	0.216376	0.107311	-0.00769	36.0961
Apatite Wilberforce (REE phosphates block)	30	h	3.69526	0.156416	0.076879	18.2228	0.141598	<0.006	38.8599	<0.024	<0.018	0.400447	0.097975	0.229556	0.108911	<0.020	36.4514	98.4411		0.0287062	0.00971397	0.00478064	0.065913	0.00407791	0.00288606	0.0795517	0.0116837	0.00890483	0.00888103	0.00918176	0.02007	0.0173353	0.00947644		3.69526	0.156416	0.076879	18.2228	0.141598	0.000845	38.8599	0.020791	0.005543	0.400447	0.097975	0.229556	0.108911	-0.0037	36.4514
Apatite Durango (Apatites block)	30	o	3.54978	0.139599	0.270839	17.688	0.120797	0.438334	38.4379	0.039913	0.077411	0.071291	0.425788	0.514114	0.158358	0.024642	37.283	99.2398		0.0278729	0.00919428	0.00647785	0.0649641	0.00388057	0.00696947	0.0790875	0.012087	0.0104741	0.00669234	0.0105562	0.0240598	0.0184071	0.00962975		3.54978	0.139599	0.270839	17.688	0.120797	0.438334	38.4379	0.039913	0.077411	0.071291	0.425788	0.514114	0.158358	0.024642	37.283
Apatite Durango (Apatites block)	30	o	3.46802	0.149116	0.276553	17.9401	0.127663	0.420368	38.7348	<0.025	0.105437	0.069659	0.450914	0.525406	0.179311	0.042454	37.7984	100.288		0.027496	0.00937631	0.00663702	0.0655587	0.00395079	0.00689017	0.0794226	0.0123242	0.00997848	0.00682155	0.010535	0.0242762	0.0186539	0.00977656		3.46802	0.149116	0.276553	17.9401	0.127663	0.420368	38.7348	0.011274	0.105437	0.069659	0.450914	0.525406	0.179311	0.042454	37.7984
Apatite Durango (Apatites block)	30	o	3.45255	0.118506	0.280043	17.8295	0.141498	0.429056	38.5707	0.067665	0.055078	0.067192	0.447842	0.551144	0.147506	<0.020	37.6036	99.7619		0.0275358	0.00995222	0.00656384	0.0653161	0.00410941	0.00696542	0.0792759	0.0120316	0.0101411	0.00683329	0.010582	0.0243738	0.0188173	0.00969705		3.45255	0.118506	0.280043	17.8295	0.141498	0.429056	38.5707	0.067665	0.055078	0.067192	0.447842	0.551144	0.147506	0.019293	37.6036
Apatite Durango (Apatites block)	30	o	3.52939	0.131931	0.277797	17.8004	0.129211	0.424382	38.4847	<0.025	0.096686	0.054614	0.444433	0.507423	0.188943	0.02244	37.4808	99.5731		0.0279917	0.00872523	0.00653612	0.0651153	0.00391529	0.00685903	0.0789895	0.0124262	0.0100809	0.00669415	0.0104553	0.0245046	0.0183502	0.00970981		3.52939	0.131931	0.277797	17.8004	0.129211	0.424382	38.4847	0.019939	0.096686	0.054614	0.444433	0.507423	0.188943	0.02244	37.4808
Apatite Durango (Apatites block)	30	o	3.52417	0.153745	0.269431	17.772	0.143451	0.414053	38.5396	0.037489	0.08333	0.05538	0.414021	0.529614	0.1451	0.053734	37.4863	99.6214		0.027717	0.00992395	0.00648846	0.0650912	0.00402446	0.00681217	0.0790813	0.0121773	0.010248	0.00668824	0.0104758	0.0240269	0.0181828	0.00962279		3.52417	0.153745	0.269431	17.772	0.143451	0.414053	38.5396	0.037489	0.08333	0.05538	0.414021	0.529614	0.1451	0.053734	37.4863
Apatite Durango (Apatites block)	30	o	3.44762	0.147919	0.266502	17.8875	0.142334	0.441711	38.7161	0.040676	0.094395	0.061959	0.441804	0.578074	0.173152	0.022598	37.744	100.206		0.027486	0.00953677	0.00655808	0.0652477	0.00402646	0.00696415	0.0792476	0.011718	0.0103381	0.0067438	0.0105295	0.0248741	0.0181179	0.00971786		3.44762	0.147919	0.266502	17.8875	0.142334	0.441711	38.7161	0.040676	0.094395	0.061959	0.441804	0.578074	0.173152	0.022598	37.744
Apatite Durango calib std for Ca, P, F
Fluorine Time Dependent Intensity (TDI)
"use" column: which fit to use for dataset
o = TDI off
e = exponential
h = hyper-exponential
d = double exponential
[truncated: 171 more columns]
