# Supplementary material for: Matrix effects in Pb/U measurements during LA-ICP-MS analysis of the mineral apatite
Source: Royal Society of Chemistry journal article supplement (doi:10.1039/c6ja00048g), 2016-01-01
Supplement: c6ja00048g3.xlsx [file c6ja00048g3.xlsx]

## Sheet: OtterLake_Primary Standard
			207 cor 206Pb/238U		206Pb/238U			Pb204	Pb206	Pb207	Pb208	Th232	U238	140Ce	Radiation dose		Data for Tera-Wasserburg plot						Data for Wetherill plot						206Pb/238U		207Pb/206Pb			Pb206	Pb207	U238
	File ID	Comment	age	+/-1 ster	ratio	+/-1 RSE		ppm	ppm	ppm	ppm	ppm	ppm	ppm	decays / mg		238U/206Pb	1 std. error	207Pb/206Pb	1 std. error		207Pb/235U	1 std. error	206Pb/238U	1 std. error	Rho			age		age	+/-1 ster		raw cps	raw cps	raw cps
OtterLake	MY15B094	line at 3um/sec	910.437	8.4218	0.174635	0.00878087		0.13264	17.5229	3.1611	41.6555	903.234	114.488	6002.4	1.01792e+15		5.72624	0.0502814	0.180071	0.00248007		4.33585	0.070821	0.174635	0.00153344	0.537589			1037.6	9.111	2653.52	11.42		52957	9576.2	421039
OtterLake	MY15B089	line at 3um/sec	931.067	7.43875	0.177983	0.00751851		0.124238	17.8106	3.14633	41.6651	931.071	114.13	6014.63	1.06142e+15		5.6185	0.0422428	0.177173	0.00221351		4.34788	0.0633981	0.177983	0.00133817	0.515624			1055.95	7.93916	2626.58	10.3859		53255.1	9431.87	415975
OtterLake	MY15B093	line at 3um/sec	914.493	7.8446	0.17589	0.00833497		0.140885	17.6436	3.19886	42.0248	905.102	114.481	6021.28	1.02401e+15		5.68539	0.0473875	0.182016	0.00181255		4.41418	0.0573227	0.17589	0.00146603	0.641841			1044.48	8.70571	2671.32	8.24313		54532	9910.89	430713
OtterLake	MY15B090	line at 3um/sec	911.488	8.09193	0.175308	0.00843955		0.145495	17.5313	3.20999	41.7023	897.298	114.249	6033.21	1.01412e+15		5.70425	0.0481413	0.182051	0.0023082		4.40043	0.0670223	0.175308	0.00147952	0.554108			1041.29	8.78801	2671.64	10.4949		54016.8	9915.5	428946
OtterLake	MY15B120	line at 3um/sec	913.998	6.06542	0.170454	0.00661083		0.0982445	16.9613	2.69447	40.1269	893.058	114.189	6040.03	1.0138e+15		5.86669	0.0387837	0.158881	0.000932824		3.73405	0.033015	0.170454	0.00112684	0.747695			1014.61	6.70742	2443.79	4.96948		52262.1	8314.94	424403
OtterLake	MY15B086	line at 3um/sec	914.209	6.59198	0.170321	0.00723508		0.118168	17.1745	2.71323	40.7513	906.454	115.342	6043.12	1.02745e+15		5.87125	0.042479	0.158111	0.000912047		3.71308	0.0343576	0.170321	0.00123229	0.781905			1013.88	7.33552	2435.56	4.88652		51732	8194.43	423932
OtterLake	MY15B114	line at 3um/sec	915.5	9.50576	0.174377	0.00980602		0.138689	17.6373	3.11335	41.7629	911.215	115.618	6084.98	1.0333e+15		5.73471	0.0562347	0.174751	0.00300854		4.20156	0.0832452	0.174377	0.00170994	0.49493			1036.18	10.1608	2603.68	14.3433		54339.3	9608.48	430536
OtterLake	MY15B121	line at 3um/sec	914.789	5.95937	0.170986	0.00648465		0.119241	17.2721	2.76654	40.8578	904.499	116.136	6098.03	1.0293e+15		5.84842	0.037925	0.160576	0.000886224		3.78567	0.0322362	0.170986	0.00110879	0.761529			1017.54	6.59842	2461.73	4.66293		53425.8	8570.09	433165
OtterLake	MY15B087	line at 3um/sec	915.817	9.45534	0.17196	0.0104989		0.11126	17.3774	2.83762	41.0517	898.89	115.381	6106.05	1.02401e+15		5.81529	0.061054	0.164004	0.0010279		3.88851	0.0475462	0.17196	0.00180539	0.858637			1022.9	10.7393	2497.36	5.27644		53052.3	8685.87	429669
OtterLake	MY15B095	line at 3um/sec	916.528	6.46645	0.171216	0.00705352		0.105255	17.4189	2.78214	41.1182	911.677	116.423	6115.44	1.03747e+15		5.84059	0.0411967	0.160116	0.000949639		3.7799	0.0348342	0.171216	0.00120767	0.765385			1018.81	7.18616	2456.89	5.01338		53145.9	8508.42	432098
OtterLake	MY15B115	line at 3um/sec	917.592	6.32564	0.171217	0.00689417		0.105354	17.49	2.77962	41.4601	920.11	117.191	6193.86	1.04734e+15		5.84055	0.0402657	0.159218	0.00090572		3.75873	0.0335957	0.171217	0.0011804	0.771327			1018.81	7.02386	2447.38	4.81311		53635.7	8538.46	434222
OtterLake	AP24C098	4 J/cm2	899.339	7.14389	0.168334	0.00784181		0.123042	17.688	2.86924	42.1138	893.228	113.637	6929.1	9.95099e+14		5.94055	0.0465847	0.161947	0.00148968		3.75878	0.0454342	0.168334	0.00132005	0.648754			1002.93	7.86477	2476.09	7.76047		22700.9	3600.49	138292
OtterLake	AP24C097	4 J/cm2	931.848	8.10021	0.17383	0.00867402		0.127606	18.7085	2.978	44.5637	924.446	116.555	6961.76	1.06553e+15		5.75275	0.0498994	0.158726	0.00149246		3.80429	0.0486668	0.17383	0.00150781	0.67805			1033.18	8.96182	2442.13	7.95997		23715.5	3693.28	140516
OtterLake	AP24C087	4 J/cm2	917.293	7.27455	0.168344	0.00797626		0.0956649	17.3215	2.54283	40.9489	902.081	113.942	7096.17	1.02336e+15		5.94022	0.0473807	0.146539	0.0011849		3.40136	0.0386324	0.168344	0.00134275	0.702265			1002.98	8.00003	2305.93	6.94243		23330.2	3371.49	150367
OtterLake	AP24C103	4 J/cm2	891.788	7.5556	0.165877	0.00844791		0.109797	17.4539	2.76086	41.6979	912.296	115.6	7201.11	1005929437541069		6.02856	0.0509288	0.15735	0.00142451		3.59878	0.0445618	0.165877	0.00140131	0.682247			989.354	8.35798	2427.39	7.67546		21913.8	3379.04	135601
OtterLake	AP24C085	4 J/cm2	916.23	7.58342	0.16848	0.00831109		0.08518	17.4388	2.56915	41.1541	920.403	116.132	7528.18	1.04247e+15		5.93543	0.0493299	0.148074	0.00129963		3.43975	0.041578	0.16848	0.00140025	0.687577			1003.73	8.34208	2323.8	7.52151		23243.9	3375.2	152572
OtterLake	AP24C112	4 J/cm2	918.502	8.76403	0.17444	0.00946541		0.100378	11.35	1.96674	19.6002	406.895	76.5079	7905.18	5.44192e+14		5.73263	0.0542617	0.17252	0.001716		4.14942	0.0569741	0.17444	0.00165115	0.689364			1036.53	9.81116	2582.24	8.30413		14898.9	2503.41	91373.8
OtterLake	AP24C113	4 J/cm2	909.54	9.0805	0.17319	0.00991198		0.0923956	11.1345	1.94996	19.2733	408.203	76.3496	8044.31	539005290566018		5.77399	0.0572317	0.174639	0.00177516		4.17029	0.0592078	0.17319	0.00171666	0.698149			1029.67	10.206	2602.61	8.46947		14848.7	2520.1	92364.4
OtterLake	AP24C086	4 J/cm2	898.325	7.42959	0.163475	0.00832504		0.0796972	16.561	2.32633	39.2125	896.983	112.805	8195.15	9.93932e+14		6.11714	0.0509254	0.140449	0.00127961		3.16572	0.0390698	0.163475	0.00136094	0.674554			976.059	8.12573	2232.76	7.8839		21941.3	3035.93	146872
OtterLake	AP24C067	Flow Restrictor	919.933	8.45081	0.173551	0.0091194		0.100792	17.8038	2.97644	42.0938	893.238	112.77	6833.24	1.01621e+15		5.76201	0.052546	0.167485	0.00165813		4.00779	0.0539455	0.173551	0.00158268	0.67751			1031.64	9.40798	2532.67	8.30548		14882	2444.92	92662.4
OtterLake	MA01G022	Flow Restrictor	936.554	9.0171	0.173688	0.00955956		0.104368	16.756	2.5874	39.832	901.093	111.576	6856.99	1.03734e+15		5.75747	0.0550388	0.154159	0.00191841		3.69181	0.0579328	0.173688	0.00166038	0.609191			1032.4	9.86926	2392.58	10.5883		15042.6	2333.28	120117
OtterLake	MA01G023	Flow Restrictor	940.509	9.07109	0.173876	0.00963086		0.0941157	16.9647	2.56996	40.2237	900.069	112.339	6923.83	1.04374e+15		5.75123	0.0553893	0.151677	0.00178666		3.63631	0.0553276	0.173876	0.00167457	0.63297			1033.43	9.95282	2364.92	10.0512		15046	2289.46	119482
OtterLake	AP24C066	Flow Restrictor	914.607	8.53776	0.170881	0.00931718		0.111806	18.1155	2.89518	43.0401	928.319	116.155	7031.36	1.04631e+15		5.85203	0.0545244	0.160261	0.00161138		3.77592	0.05176	0.170881	0.00159213	0.679692			1016.96	9.47522	2458.42	8.49789		15235.1	2393.08	96059.9
OtterLake	AP24C072	Flow Restrictor	890.664	8.96037	0.165822	0.00997116		0.105359	16.8225	2.63332	39.8781	894.385	112.892	7047.29	9.83495e+14		6.03057	0.0601318	0.158078	0.00199067		3.61422	0.0580538	0.165822	0.00165344	0.620769			989.05	9.86197	2435.21	10.6682		14957.3	2299.06	98503.1
OtterLake	MA01G007	Flow Restrictor	933.148	8.94106	0.172545	0.00954492		0.117037	17.285	2.64887	41.0142	938.593	117.096	7140.53	1079290781056114		5.79559	0.0553184	0.151966	0.00183063		3.61536	0.0555659	0.172545	0.00164693	0.621034			1026.12	9.79421	2368.17	10.2755		14327.7	2207.17	116347
OtterLake	AP24C056	Flow Restrictor	919.009	8.91111	0.16884	0.00976868		0.0756672	17.2376	2.52785	41.1349	922.324	116.218	7146.28	1.04747e+15		5.92276	0.0578576	0.147328	0.00152119		3.42976	0.0487503	0.16884	0.00164935	0.687261			1005.72	9.82453	2315.15	8.85642		15398.2	2223	102455
OtterLake	MA01G006	Flow Restrictor	939.381	9.09513	0.173271	0.00963942		0.121509	17.3571	2.6091	41.3437	938.311	116.904	7190.51	1.08602e+15		5.77131	0.055632	0.149946	0.00189583		3.5823	0.0569545	0.173271	0.00167023	0.606296			1030.11	9.92964	2345.31	10.8106		14611.4	2207.96	117960
OtterLake	AP24C054	Flow Restrictor	917.207	8.97023	0.169004	0.00983177		0.0756258	16.8642	2.51673	40.2861	908.764	115.367	7265.58	1032735237758602		5.91701	0.0581747	0.149621	0.00159183		3.48651	0.0505067	0.169004	0.00166161	0.678694			1006.62	9.89688	2341.6	9.10034		15177.6	2230.57	102544
OtterLake	MA01G026	Flow Restrictor	906.786	8.41152	0.166012	0.00923451		0.0771582	16.0276	2.31002	38.283	892.835	110.045	7420.02	9.91912e+14		6.02368	0.0556257	0.144902	0.00180779		3.31676	0.0514821	0.166012	0.00153304	0.594938			990.099	9.14308	2286.61	10.7337		14635.4	2118.47	120513
OtterLake	MA01G027	Flow Restrictor	909.222	8.56443	0.165132	0.00949494		0.0741824	16.2459	2.26172	38.4905	903.031	111.711	7734.66	1.00739e+15		6.05575	0.0574989	0.138673	0.00150934		3.15736	0.0456039	0.165132	0.00156792	0.657378			985.236	9.35475	2210.7	9.44101		14659.6	2049.59	120896
OtterLake	MA01G003	Flow Restrictor	906.52	8.66992	0.164526	0.00959621		0.0868193	16.8422	2.31638	40.2581	957.141	118.611	7815.37	1.06508e+15		6.07807	0.0583264	0.138191	0.00169612		3.13485	0.0488404	0.164526	0.00157883	0.615938			981.88	9.42232	2204.66	10.6533		14526.8	2008.79	122618
OtterLake	MA01G002	Flow Restrictor	901.034	8.41977	0.163317	0.00937814		0.0645845	16.3765	2.24985	39.2119	931.275	115.838	8232.62	1.03111e+15		6.12308	0.0574231	0.137305	0.00164205		3.09185	0.046989	0.163317	0.00153161	0.617077			975.181	9.14539	2193.49	10.3929		14427	1992.89	122307
OtterLake	AP24C082	Flow Restrictor	912.095	10.2895	0.173292	0.0111424		0.0941266	10.75	1.85251	18.4088	400.547	74.0515	8259.72	527662152716380		5.77061	0.0642984	0.172934	0.00229093		4.132	0.0715261	0.173292	0.00193088	0.643685			1030.22	11.4791	2586.24	11.0555		9414.57	1590.74	63436.4
OtterLake	MA01G020	Flow Restrictor	904.578	10.5827	0.168436	0.0111132		0.0910016	16.2954	2.62993	38.2241	895.42	112.146	8653.53	9.97963e+14		5.93696	0.0659784	0.157899	0.00346784		3.66705	0.0902608	0.168436	0.00187186	0.451497			1003.49	11.1519	2433.29	18.6091		14419.1	2337.81	118992
OtterLake	MA01G021	Flow Restrictor	884.662	9.61159	0.165755	0.0108105		0.101223	15.8742	2.56692	37.8584	878.756	110.91	8711.38	959453253337263		6.03302	0.0652197	0.163002	0.00202014		3.72529	0.061265	0.165755	0.00179188	0.657342			988.677	10.6881	2487.04	10.4443		13985.2	2271.74	117171
OtterLake	MA01G011	Flow Restrictor	900.981	8.28737	0.162968	0.0091821		0.0751413	16.7437	2.2534	39.4573	959.576	120.344	9136.97	1.06552e+15		6.13616	0.0563428	0.135696	0.00178085		3.04911	0.0488376	0.162968	0.00149639	0.573272			973.252	8.93649	2172.98	11.4308		13356.8	1806.64	115088
OtterLake	MA01G010	Flow Restrictor	903.02	8.72957	0.162894	0.0097149		0.0842945	16.7127	2.22582	39.9123	964.164	119.803	9164.82	1.06959e+15		6.13896	0.0596393	0.133535	0.00169979		2.99918	0.0480254	0.162894	0.0015825	0.606694			972.84	9.45104	2144.97	11.1215		13340.4	1785.73	114639
OtterLake	AP24C081	Flow Restrictor	908.02	8.43001	0.165826	0.00924578		0.0932951	16.4451	2.32301	35.6405	840.098	117.023	9414.88	978090602458308		6.03043	0.0557561	0.142962	0.0018166		3.26868	0.0513661	0.165826	0.00153319	0.588355			989.07	9.14472	2263.39	10.9595		14618.4	2024.98	101785
OtterLake	Ma01B030	No N2	919.851	11.4674	0.173041	0.0122208		0.115475	17.0183	2.7767	40.3337	883.497	110.505	6480.46	1.00165e+15		5.77898	0.070624	0.165337	0.00290053		3.94475	0.0843395	0.173041	0.00211471	0.571596			1028.84	12.5733	2510.98	14.749		12043.3	1980.63	98006.4
OtterLake	Ma01B029	No N2	920.373	9.0584	0.172792	0.00960874		0.106619	17.0909	2.78107	40.9871	883.439	108.973	6571.18	997197707136658		5.7873	0.0556086	0.163812	0.00229006		3.90275	0.0662046	0.172792	0.00166032	0.566433			1027.48	9.87277	2495.39	11.7715		11318.3	1855.91	90443
OtterLake	Ma01B016	No N2	913.263	9.64004	0.16986	0.0105003		0.0857294	16.7777	2.62196	39.4767	887.834	109.521	6653.56	9.94053e+14		5.8872	0.0618175	0.156854	0.00204471		3.67357	0.0614912	0.16986	0.00178358	0.627304			1011.34	10.6194	2422.03	11.0581		10874.8	1706.39	88954.1
OtterLake	Ma01B009	No N2	920.837	9.73003	0.171095	0.0105461		0.110591	17.286	2.69367	41.254	916.997	113.375	6692.73	1.03648e+15		5.8447	0.061639	0.155925	0.00196025		3.67837	0.0603599	0.171095	0.00180439	0.642689			1018.14	10.7375	2411.95	10.6754		11213.9	1751.12	92155.3
OtterLake	Ma01B008	No N2	927.901	9.98968	0.172247	0.0106573		0.106194	17.3112	2.69192	40.9927	910.067	112.936	6720.59	1.03832e+15		5.80562	0.0618721	0.155068	0.0022731		3.68278	0.0667442	0.172247	0.00183568	0.588042			1024.48	10.9182	2402.58	12.4596		11258.8	1753.92	92030.7
OtterLake	Ma01B015	No N2	912.331	10.3372	0.168813	0.0113139		0.104171	17.3494	2.64219	41.4968	921.441	114.025	6775.24	1.03174e+15		5.9237	0.0670202	0.15294	0.00213835		3.55982	0.0640264	0.168813	0.00190994	0.629045			1005.57	11.3769	2379.06	11.913		11123.7	1700.48	91609.1
OtterLake	Ma01B011	No N2	906.261	9.50615	0.167721	0.0104772		0.109441	17.4954	2.68071	41.8999	943.2	116.517	6927.09	1.04808e+15		5.96228	0.0624679	0.15321	0.00192423		3.54304	0.0579491	0.167721	0.00175725	0.640581			999.543	10.4724	2382.06	10.6979		11374.6	1747.48	94918.9
OtterLake	Ma01B022	No N2	941.65	10.1065	0.175925	0.0106515		0.129146	19.2288	3.06817	45.5079	988.851	120.812	6977.76	1.13941e+15		5.68423	0.0605455	0.159685	0.00216652		3.87341	0.0668128	0.175925	0.00187387	0.61751			1044.68	11.1274	2452.32	11.4738		11647.3	1869.13	91703.4
OtterLake	Ma01B021	No N2	932.75	8.78829	0.174101	0.00919001		0.130593	19.3315	3.07227	45.423	992.522	122.567	7071.13	1.13662e+15		5.74381	0.0527856	0.159156	0.00224242		3.82053	0.0642679	0.174101	0.00159999	0.546318			1034.66	9.50858	2446.71	11.922		11545.7	1844.93	91733.4
OtterLake	Ma01B027	No N2	885.304	8.89443	0.162238	0.00996696		0.0825507	16.7903	2.44967	39.9018	923.748	114.123	7166.88	1.00162e+15		6.16379	0.0614343	0.146138	0.00205899		3.269	0.0564177	0.162238	0.00161702	0.577514			969.201	9.65999	2301.22	12.103		10983	1613.83	93554.7
OtterLake	Ma01B020	No N2	895.047	9.71889	0.165777	0.0108072		0.116561	17.6318	2.7106	41.8118	954.404	117.765	7188.25	1.04634e+15		6.03219	0.0651909	0.154053	0.00210491		3.52124	0.0613433	0.165777	0.00179158	0.620356			988.803	10.6862	2391.41	11.6271		10649.3	1645.65	89132.6
OtterLake	Ma01B003	No N2	917.511	9.47838	0.167566	0.0103065		0.0956618	16.565	2.36248	39.251	900.061	112.385	7644.54	1.01708e+15		5.96781	0.0615073	0.142779	0.00202375		3.29876	0.0578108	0.167566	0.00172702	0.588103			998.685	10.293	2261.19	12.2277		10280.9	1466.82	87389.8
OtterLake	Ma01B002	No N2	915.419	12.233	0.168576	0.0132057		0.0618518	16.3998	2.45127	38.7133	908.106	112.818	7968.79	1.02186e+15		5.93205	0.0783368	0.149209	0.00300588		3.46809	0.0835394	0.168576	0.00222616	0.548227			1004.26	13.2619	2336.88	17.2404		10656.6	1593	91847
OtterLake	Ma01B010	No N2	884.574	9.58014	0.159969	0.0108353		0.0643022	15.649	2.1247	36.6755	867.58	109.479	8335.84	9.47085e+14		6.25121	0.0677336	0.135934	0.0020609		2.99823	0.0558719	0.159969	0.00173331	0.58145			956.605	10.3651	2176.03	13.2008		10163.7	1383.23	89092.6
OtterLake	DE09A131	ok	925.071	7.84962	0.172758	0.00842347		0.117428	17.6327	2.81339	41.7849	892.031	109.834		1.01164e+15		5.78844	0.0487587	0.15971	0.00155995		3.80428	0.0490674	0.172758	0.00145522	0.653087			1027.29	8.65335	2452.6	8.25989		20075.6	3299.24	156440
OtterLake	DE09A131	ok	929.623	7.93531	0.173641	0.00848009		0.117316	17.6047	2.80959	41.7068	891.205	109.745		1.01597e+15		5.759	0.0488369	0.159762	0.00155862		3.82497	0.0494428	0.173641	0.00147249	0.656034			1032.14	8.75266	2453.15	8.24971		20075.6	3299.24	156440
OtterLake	NO14A138	ok	911.899	10.1558	0.16953	0.011312		0.0727175	17.2227	2.70753	41.1196	920.696	112.149		1.02461e+15		5.89868	0.0667259	0.156539	0.00134868		3.65905	0.0520294	0.16953	0.00191772	0.795535			1009.52	11.4197	2418.61	7.3111		23554.4	3718.06	179922
OtterLake	DE09A107	ok	920.151	7.93488	0.171929	0.00860156		0.120785	17.5193	2.81089	41.6403	888.931	109.861		1.00383e+15		5.81635	0.0500297	0.160204	0.00145592		3.79773	0.0475213	0.171929	0.00147886	0.687405			1022.73	8.79708	2457.82	7.68125		19989.1	3300.21	156876
OtterLake	DE09A107	ok	924.139	7.93016	0.1727	0.00855784		0.120708	17.5008	2.80838	41.5888	888.387	109.802		1.00781e+15		5.79039	0.0495532	0.160239	0.00145426		3.81559	0.0475959	0.1727	0.00147794	0.68605			1026.97	8.78865	2458.18	7.67052		19989.1	3300.21	156876
OtterLake	NO14A125	ok	897.149	10.5136	0.166313	0.011905		0.120772	16.7957	2.61169	40.4269	890.299	109.536		9.77448e+14		6.01278	0.0715818	0.154677	0.00144493		3.54692	0.0536738	0.166313	0.00197994	0.786713			991.762	11.8069	2398.28	7.94367		22524.7	3510.46	172559
OtterLake	DE09A003	ok	919.622	7.56263	0.170692	0.00817066		0.111873	17.1293	2.65101	40.3138	893.401	111.213		1.01088e+15		5.85851	0.0478679	0.155158	0.00150961		3.65165	0.0463949	0.170692	0.00139467	0.643096			1015.92	8.30076	2403.57	8.26902		18977.7	3010.29	154565
OtterLake	NO14A151	ok	907.871	20.5528	0.200348	0.0203094		0.296773	20.552	5.7935	46.9777	893.337	110.267		9.94232e+14		4.99132	0.101371	0.278767	0.00716707		7.70065	0.252303	0.200348	0.00406894	0.619872			1177.19	23.908	3356.04	20.0818		25372.1	7194.23	159472
OtterLake	DE09A003	ok	922.751	7.57972	0.171296	0.0081608		0.111786	17.1073	2.6481	40.2526	892.734	111.14		1.01377e+15		5.83784	0.0476414	0.155199	0.00151179		3.66554	0.0465805	0.171296	0.00139792	0.642193			1019.25	8.31789	2404.01	8.27844		18977.7	3010.29	154565
OtterLake	DE09A004	ok	915.376	8.02101	0.170252	0.00869952		0.0877014	16.8467	2.63712	39.9529	886.343	109.633		9.95755e+14		5.87366	0.051098	0.156804	0.00165019		3.68087	0.0502589	0.170252	0.00148111	0.637137			1013.5	8.81693	2421.49	8.9278		18583.9	2981.69	151706
OtterLake	DE09A004	ok	918.415	8.01451	0.17084	0.00866081		0.0876346	16.8254	2.63428	39.8933	885.692	109.562		9.98525e+14		5.85343	0.0506955	0.156845	0.00165229		3.69454	0.050385	0.17084	0.00147961	0.635065			1016.74	8.80576	2421.93	8.93644		18583.9	2981.69	151706
OtterLake	DE09A106	ok	902.308	7.62439	0.166129	0.00844306		0.106283	16.8183	2.49881	39.906	891.129	108.778		981505795269577		6.01942	0.0508223	0.149346	0.00145773		3.4209	0.0441491	0.166129	0.00140264	0.654211			990.748	8.36494	2338.45	8.35181		19223.4	2938.88	155607
OtterLake	DE09A106	ok	906.21	7.71198	0.166873	0.00850938		0.106217	16.801	2.49662	39.8576	890.594	108.721		9.85394e+14		5.99258	0.0509932	0.149377	0.00145632		3.43694	0.0444758	0.166873	0.00141998	0.657576			994.859	8.46563	2338.81	8.34166		19223.4	2938.88	155607
OtterLake	DE09A159	ok	918.491	11.2978	0.169415	0.0123835		0.0607588	17.9377	2.67253	42.4082	901.543	111.197		1.01542e+15		5.90266	0.0730954	0.150382	0.00206444		3.51276	0.0649441	0.169415	0.00209795	0.66981			1008.89	12.4935	2350.27	11.7319		17763.9	2728.14	137549
OtterLake	DE09A228	ok	918.886	8.21519	0.169445	0.00899688		0.0874621	17.4319	2.60599	41.2685	905.194	112.197		1.02179e+15		5.90163	0.0530962	0.150179	0.00136508		3.50864	0.044873	0.169445	0.00152447	0.703469			1009.05	9.07831	2347.96	7.76987		19240.1	2974.04	154674
OtterLake	DE09A228	ok	920.45	8.23977	0.169767	0.00900955		0.0872654	17.3664	2.59771	41.0871	903.21	111.981		1021467041951127		5.89044	0.0530702	0.150295	0.00136428		3.51802	0.0449935	0.169767	0.00152952	0.704452			1010.82	9.10707	2349.29	7.75824		19240.1	2974.04	154674
OtterLake	DE09A132	ok	913.591	8.87568	0.169284	0.00975226		0.110548	17.1691	2.64748	40.5896	893.942	109.882		9.99994e+14		5.90724	0.0576089	0.153985	0.00158144		3.59415	0.0509027	0.169284	0.0016509	0.688589			1008.16	9.83188	2390.66	8.74009		18976.4	3014.06	151932
OtterLake	DE09A132	ok	917.867	8.71937	0.170108	0.00952342		0.11044	17.1414	2.64386	40.5127	893.102	109.791		1004005649546933		5.87863	0.0559847	0.154036	0.00158028		3.61283	0.0505726	0.170108	0.00162001	0.680338			1012.7	9.6444	2391.22	8.73028		18976.4	3014.06	151932
OtterLake	DE09A159	ok	912.815	11.2084	0.168349	0.0123237		0.0611463	17.9511	2.67979	42.6439	904.603	111.437		1.01181e+15		5.94004	0.0732032	0.150418	0.00218016		3.49149	0.0664256	0.168349	0.00207468	0.647764			1003.01	12.3608	2350.68	12.386		17502.5	2694.19	135863
OtterLake	DE09A229	ok	910.745	7.629	0.167395	0.00836702		0.0836845	17.3936	2.57039	41.5389	921.566	113.064		1026835739818114		5.97388	0.0499835	0.147847	0.00147355		3.41238	0.0444059	0.167395	0.0014006	0.642966			997.745	8.34815	2321.17	8.54352		19149.2	2926.1	155472
OtterLake	DE09A229	ok	912.244	7.71536	0.167703	0.00845419		0.0834951	17.3279	2.56218	41.3553	919.533	112.845		1026439568908310		5.96291	0.0504116	0.147962	0.00147303		3.42132	0.0446852	0.167703	0.0014178	0.647296			999.445	8.44949	2322.51	8.53266		19149.2	2926.1	155472
OtterLake	DE09A183	ok	908.491	7.89389	0.168134	0.00863653		0.101956	17.3071	2.65727	41.216	896.852	110.912		9.9954e+14		5.94765	0.051367	0.153163	0.00162938		3.55066	0.0486533	0.168134	0.00145209	0.630283			1001.82	8.65225	2381.54	9.06192		19092.3	3024.29	152729
OtterLake	DE09A008	ok	906.933	7.24683	0.16705	0.00796014		0.0848308	17.1694	2.57554	40.7482	917.966	113.645		1.02162e+15		5.98624	0.0476513	0.149563	0.00142503		3.44486	0.0427698	0.16705	0.00132974	0.641141			995.836	7.92699	2340.93	8.15053		19025.7	2925.68	157952
OtterLake	DE09A008	ok	909.499	7.27431	0.167542	0.00796848		0.0847707	17.1493	2.57297	40.6918	917.34	113.577		1.02399e+15		5.96864	0.047561	0.149599	0.00142713		3.45584	0.0429559	0.167542	0.00133506	0.641071			998.557	7.95698	2341.34	8.16025		19025.7	2925.68	157952
OtterLake	NO14A150	ok	908.69	20.3402	0.178196	0.0212102		0.179228	18.114	3.72126	43.0901	917.992	112.328		1.01947e+15		5.61181	0.119028	0.196367	0.00654834		4.82466	0.190676	0.178196	0.00377957	0.536679			1057.11	22.4215	2796.24	27.2868		24834.1	5131.08	180428
OtterLake	DE09A183	ok	906.706	8.04047	0.167839	0.00880458		0.102019	17.3372	2.65665	41.1949	899.951	111.281		1.00088e+15		5.95811	0.0524586	0.15336	0.0017002		3.549	0.050244	0.167839	0.00147775	0.621915			1000.19	8.80626	2383.74	9.44143		19446.1	3075.56	156016
OtterLake	NO14A126	ok	906.298	37.525	0.192925	0.0380466		0.276436	19.0086	5.0644	44.7893	927.535	112.138		1.02286e+15		5.18336	0.197209	0.254404	0.0130197		6.76727	0.431551	0.192925	0.00734014	0.596618			1137.2	43.2666	3212.38	40.4217		26666.8	7121.76	184775
OtterLake	DE09A029	ok	922.231	8.75933	0.171371	0.0094294		0.122502	16.9806	2.6371	40.2993	902.266	111.372		1.02086e+15		5.83529	0.0550233	0.155972	0.0018568		3.6854	0.0559692	0.171371	0.00161592	0.620898			1019.66	9.61478	2412.45	10.1086		20997.8	3345.48	172639
OtterLake	DE09A028	ok	910.545	18.4192	0.181118	0.0191955		0.204797	18.9204	4.2437	44.8407	927.238	112.586		1.02912e+15		5.52128	0.105984	0.206662	0.0057294		5.16086	0.174026	0.181118	0.00347664	0.569255			1073.08	20.5982	2879.55	22.5164		21109.1	4857.09	157463
OtterLake	DE09A029	ok	920.499	8.84527	0.171382	0.00950883		0.121604	17.0377	2.67559	40.4046	901.97	111.317		1.01845e+15		5.83493	0.0554834	0.157487	0.00195665		3.72144	0.0582234	0.171382	0.00162964	0.607772			1019.72	9.69634	2428.86	10.532		20830.7	3355.65	170547
OtterLake	DE09A077	ok	897.099	8.34955	0.169904	0.00896768		0.126235	17.6031	3.015	41.8758	917.708	113.704		1.01001e+15		5.88566	0.0527807	0.170845	0.00231064		4.00229	0.0649479	0.169904	0.00152365	0.552615			1011.58	9.07156	2565.94	11.3093		21046.3	3704.87	170219
OtterLake	DE09A206	ok	906.408	7.32938	0.167359	0.00801057		0.0869697	17.2104	2.60648	40.9843	901.039	111.271		1.00128e+15		5.97518	0.0478646	0.151432	0.00156784		3.49436	0.0457431	0.167359	0.00134064	0.611935			997.543	7.99088	2362.16	8.83705		18994.4	2971.81	153442
OtterLake	DE09A206	ok	909.303	7.39352	0.16793	0.00805993		0.0867995	17.1542	2.59927	40.8276	899.322	111.085		1.00281e+15		5.95488	0.0479959	0.151534	0.00156725		3.50864	0.0460062	0.16793	0.0013535	0.614686			1000.69	8.06552	2363.31	8.82674		18994.4	2971.81	153442
OtterLake	DE09A028	ok	910.992	17.6634	0.181625	0.0183226		0.210474	18.9707	4.31161	45.0175	929.05	112.963		1032171227792886		5.50584	0.100881	0.208321	0.00558189		5.21686	0.169341	0.181625	0.00332784	0.56446			1075.85	19.7123	2892.52	21.7371		21342.8	4975.71	159259
OtterLake	DE09A077	ok	902.017	8.13422	0.170731	0.00868681		0.123062	17.6057	3.01068	41.8674	917.947	113.566		1.01555e+15		5.85716	0.0508801	0.170294	0.00223325		4.0088	0.0630593	0.170731	0.00148311	0.552237			1016.14	8.827	2560.54	10.9717		20862.9	3666.57	168476
OtterLake	DE09A205	ok	899.736	7.99544	0.165665	0.00888611		0.0913224	17.3368	2.59042	41.2883	914.639	112.508		1007133532876702		6.03626	0.0536389	0.149447	0.00153782		3.41366	0.0464119	0.165665	0.00147212	0.653587			988.184	8.78112	2339.61	8.80367		18772.8	2897.64	152222
OtterLake	DE09A205	ok	902.614	8.03833	0.16623	0.00890758		0.0911449	17.2806	2.5833	41.1315	912.908	112.321		1.00868e+15		6.01574	0.0535857	0.149547	0.00153722		3.4276	0.0466212	0.16623	0.00148071	0.654887			991.309	8.83016	2340.75	8.79328		18772.8	2897.64	152222
OtterLake	DE09A158	ok	888.693	10.4423	0.175552	0.0105254		0.161997	19.1411	3.87513	44.7973	936.346	119.409		1.03109e+15		5.69631	0.0599561	0.20196	0.00403742		4.88847	0.110444	0.175552	0.00184776	0.465877			1042.63	10.9741	2842.1	16.2905		23856.2	4979.93	186098
OtterLake	DE09A158	ok	895.578	10.4468	0.176958	0.0104282		0.161784	19.0991	3.86793	44.682	935.149	119.275		1.0382e+15		5.65106	0.0589306	0.202051	0.00403811		4.92984	0.111132	0.176958	0.00184536	0.4626			1050.33	10.9531	2842.84	16.2848		23856.2	4979.93	186098
OtterLake	DE09A056	ok	906.778	8.15319	0.166903	0.00904197		0.0893171	17.7877	2.6513	42.5674	951.943	116.388		1054538591281049		5.99151	0.054175	0.149023	0.00139714		3.4294	0.0446683	0.166903	0.00150913	0.694194			995.025	8.99699	2334.74	8.02515		20019.6	3064.32	164083
OtterLake	DE09A056	ok	905.221	8.06624	0.16661	0.00895497		0.0893121	17.786	2.65109	42.5628	951.891	116.383		1.05258e+15		6.00205	0.0537482	0.149025	0.00139895		3.42343	0.0444141	0.16661	0.00149198	0.690249			993.404	8.89591	2334.77	8.03536		20019.6	3064.32	164083
OtterLake	DE09A184	ok	910.995	7.75714	0.167404	0.00851702		0.0699152	17.4243	2.5725	41.3804	907.126	112.234		1.01408e+15		5.97356	0.050877	0.147672	0.00147054		3.40851	0.0446638	0.167404	0.00142579	0.649975			997.794	8.49823	2319.14	8.53802		19232.1	2930.76	154839
OtterLake	DE09A184	ok	914.82	7.80125	0.168144	0.00853181		0.0697988	17.3759	2.56646	41.2458	905.658	112.075		1016975733542905		5.94728	0.0507411	0.147756	0.00146971		3.42553	0.0448904	0.168144	0.00143457	0.651052			1001.88	8.54782	2320.12	8.52748		19232.1	2930.76	154839
OtterLake	DE09A055	ok	890.792	7.56113	0.166383	0.00836011		0.118396	17.8435	2.85153	42.804	967.205	117.106		1.04802e+15		6.01022	0.0502461	0.160525	0.00170487		3.68259	0.0497748	0.166383	0.00139098	0.618523			992.153	8.2945	2461.2	8.97364		19965.2	3276.4	164136
OtterLake	DE09A055	ok	889.385	7.59233	0.166115	0.00841167		0.118388	17.8415	2.85125	42.7981	967.14	117.099		1.04622e+15		6.01992	0.0506376	0.160529	0.00170661		3.67674	0.0498437	0.166115	0.00139731	0.62049			990.671	8.33319	2461.24	8.98253		19965.2	3276.4	164136
OtterLake	DE09A078	ok	905.566	10.7016	0.170215	0.011401		0.132194	18.1862	3.03074	42.9252	936.591	115.338		1.03873e+15		5.87491	0.06698	0.165001	0.00311372		3.87246	0.0853782	0.170215	0.00194063	0.51711			1013.3	11.5526	2507.56	15.8707		20059.2	3435.87	159289
OtterLake	DE09A078	ok	908.267	10.6774	0.170738	0.011334		0.132162	18.1789	3.02971	42.905	936.372	115.314		1.04175e+15		5.85693	0.0663827	0.165015	0.00311299		3.88466	0.0854933	0.170738	0.00193515	0.514999			1016.18	11.5174	2507.7	15.8655		20059.2	3435.87	159289
OtterLake	MY05A006	ok	903.271	21.8201	0.182034	0.0230549		0.20881	19.1244	3.84257	43.0808	872.352	116.53	5360.36	9.94082e+14		5.49348	0.126652	0.21613	0.00657577		5.42462	0.207076	0.182034	0.00419678	0.603952			1078.08	24.855	2952.08	24.5543		25739.2	5183.6	190983
OtterLake	MY05A005	ok	922.046	6.98918	0.172678	0.00756602		0.095962	17.1757	2.77889	40.4633	879.95	108.889	6539.65	9.96293e+14		5.79114	0.0438158	0.161902	0.00113271		3.85469	0.0397225	0.172678	0.00130648	0.734211			1026.85	7.76915	2475.62	5.90275		27120.2	4398.02	209434
OtterLake	MY05A178	ok	908.733	7.82491	0.170978	0.00852105		0.0674389	11.8526	1.96233	22.9232	489.356	78.5685	7105.99	6.03757e+14		5.84871	0.0498372	0.165677	0.00159074		3.90574	0.0501391	0.170978	0.00145691	0.663774			1017.5	8.67014	2514.44	8.06941		19013.8	3147.88	145569
OtterLake	MY05A249	ok	919.794	7.2006	0.170382	0.00780808		0.113031	17.0623	2.61456	40.2294	885.724	110.742	6687.01	1.00398e+15		5.86917	0.045827	0.153624	0.00132217		3.60896	0.0419385	0.170382	0.00133035	0.671914			1014.21	7.91907	2386.66	7.32744		28298.8	4332.27	207558
OtterLake	MY05A130	ok	920.559	7.50648	0.173825	0.00804537		0.089877	12.3047	2.06868	24.0475	511.271	80.618	6884.33	6.3465e+14		5.75293	0.0462845	0.168148	0.00151669		4.02999	0.0487092	0.173825	0.00139848	0.66564			1033.15	8.31207	2539.29	7.56213		19933.5	3353.3	153078
OtterLake	MY05A055	ok	930.037	7.32409	0.173332	0.00786608		0.112884	17.4677	2.76252	41.5155	902.602	112.888	6708.1	1.0352e+15		5.76926	0.0453814	0.158061	0.00125461		3.77752	0.0422135	0.173332	0.00136345	0.703903			1030.45	8.10557	2435.03	6.7244		27624	4375.87	214137
OtterLake	MY05A250	ok	915.044	7.09236	0.169979	0.0077687		0.101065	17.164	2.66906	40.7236	893.053	111.666	6770.64	1006821500306139		5.88307	0.0457038	0.155869	0.00113027		3.65307	0.0388216	0.169979	0.00132052	0.731025			1012	7.8619	2411.33	6.15804		28505.2	4428.39	209504
OtterLake	OC30C125	ok	908.834	7.50705	0.166731	0.00831308		0.0892173	15.994	2.34054	37.5254	877.618	107.501	6878.41	9.75161e+14		5.99767	0.0498591	0.14645	0.00123304		3.36674	0.039835	0.166731	0.00138605	0.702596			994.077	8.26385	2304.88	7.22965		18584.1	2758.45	156475
OtterLake	MY05A056	ok	925.581	6.96696	0.17177	0.00754449		0.105624	18.1341	2.80771	43.4646	953.616	118.21	6880.92	1.08472e+15		5.82174	0.0439221	0.154911	0.00109611		3.66885	0.0379483	0.17177	0.00129592	0.729404			1021.86	7.70939	2400.85	6.01529		28805.1	4467.13	225158
OtterLake	OC30C168	ok	911.56	7.51426	0.167692	0.00825997		0.072747	16.2721	2.41746	38.8533	898.184	109.121	6958.05	9.98245e+14		5.96331	0.0492568	0.148502	0.00134521		3.43357	0.0420923	0.167692	0.00138513	0.673786			999.383	8.25487	2328.75	7.75885		18738.3	2846.75	157593
OtterLake	MY05A203	ok	909.804	12.6538	0.172892	0.0133937		0.118865	14.4984	2.5613	32.0366	694.326	93.9867	7049.14	8.01225e+14		5.78395	0.0774687	0.17313	0.00371592		4.12714	0.104414	0.172892	0.00231567	0.52941			1028.03	13.7691	2588.13	17.9086		23248.4	4105.63	172730
OtterLake	OC30C167	ok	912.313	7.40879	0.167929	0.00814376		0.0932415	16.1697	2.4111	38.2744	888.773	108.241	6992.73	9.89496e+14		5.95489	0.0484952	0.148935	0.00128823		3.44846	0.0409679	0.167929	0.00136757	0.685498			1000.69	8.14939	2333.74	7.40468		18300.5	2789.94	153632
OtterLake	OC30C148	ok	918.094	7.45138	0.168271	0.00816065		0.0995096	16.504	2.40699	39.0901	904.732	109.708	6999.08	1012407470980016		5.9428	0.0484971	0.145515	0.00124998		3.37612	0.0400016	0.168271	0.0013732	0.688756			1002.58	8.18168	2293.88	7.3847		18846.7	2800.11	157034
OtterLake	MY05A079	ok	917.834	6.95754	0.169726	0.00758329		0.105902	18.2849	2.77863	44.1209	976.214	121.48	7049.22	1.1022e+15		5.89185	0.0446796	0.152348	0.00118816		3.56521	0.0387824	0.169726	0.00128708	0.697121			1010.6	7.66368	2372.44	6.64966		28052.6	4268.53	221906
OtterLake	MY05A026	ok	907.195	14.8941	0.17952	0.0154555		0.212884	19.802	4.05208	47.5995	984.211	118.504	6805.12	1084922240454983		5.57042	0.0860939	0.202965	0.00479238		5.02381	0.141775	0.17952	0.00277458	0.547671			1064.35	16.4501	2850.19	19.227		27079.1	5552.44	196124
OtterLake	MY05A080	ok	915.664	6.73193	0.16915	0.00731615		0.107952	18.3554	2.78383	43.9787	988.647	122.592	6987.21	1.11205e+15		5.91193	0.0432525	0.151603	0.00126923		3.53574	0.0393115	0.16915	0.00123752	0.658026			1007.42	7.37046	2364.09	7.14442		28454.7	4321.09	226206
OtterLake	MY05A155	ok	916.117	7.40535	0.17037	0.00801953		0.0787216	13.7537	2.1409	29.0412	650.437	92.4741	7348.75	770465342488520		5.86958	0.0470713	0.156703	0.00148819		3.68105	0.0457552	0.17037	0.00136629	0.645179			1014.15	8.13301	2420.39	8.05745		21934.4	3415.28	171538
OtterLake	MY05A228	ok	916.472	17.0042	0.178001	0.0176369		0.155513	15.8435	3.17873	35.9684	755.708	99.518	7042.61	8.69735e+14		5.61794	0.0990832	0.1892	0.00535142		4.64351	0.154781	0.178001	0.00313939	0.529118			1056.05	18.6254	2735.22	23.2737		25567.7	5126.26	182659
OtterLake	MY05A027	ok	881.337	7.73455	0.164679	0.00851264		0.11082	17.6949	2.88744	42.642	969.981	118.976	7193.07	1.04413e+15		6.07241	0.0516922	0.161002	0.0020943		3.6557	0.0568307	0.164679	0.00140186	0.547586			982.728	8.36561	2466.21	10.9852		27003.8	4415.34	219672
OtterLake	OC30C106	ok	916.75	7.46143	0.167753	0.00816502		0.08719	17.6816	2.5611	42.6319	996.328	119.286	7361.56	1.10821e+15		5.96113	0.0486728	0.144301	0.00133488		3.33765	0.0411822	0.167753	0.00136971	0.661742			999.721	8.16274	2279.46	7.96488		20347.7	2978.72	171876
OtterLake	MY05A129	ok	908.217	7.22743	0.1661	0.00802511		0.0808335	16.7668	2.41664	40.1098	921.401	114.657	7648.58	1.02886e+15		6.02047	0.0483149	0.144066	0.00112223		3.29938	0.0369002	0.1661	0.00133297	0.717554			990.588	7.94958	2276.65	6.70894		26756.9	3858.97	214532
OtterLake	OC30C170	ok	914.658	7.49821	0.166806	0.00826031		0.0952268	17.9976	2.54497	43.2672	1017.39	121.431	7373.35	1.1277e+15		5.99499	0.0495204	0.141739	0.00123683		3.25989	0.0391698	0.166806	0.00137787	0.68746			994.489	8.21478	2248.56	7.53808		20798.2	3008.57	175996
OtterLake	MY05A106	ok	901.67	7.08026	0.164722	0.00786862		0.0808872	16.4525	2.38115	39.2208	906.663	113.285	7735.81	1.00623e+15		6.07083	0.047769	0.143369	0.00129118		3.25619	0.0389414	0.164722	0.00129614	0.657956			982.966	7.73458	2268.3	7.76339		26369.9	3820.06	214401
OtterLake	MY08A147	ok	919.176	6.19403	0.170245	0.00672157		0.0930922	17.1627	2.62863	40.3677	897.408	111.85	6809.42	1.01535e+15		5.87389	0.0394817	0.153537	0.001017		3.60403	0.0340108	0.170245	0.00114431	0.712266			1013.46	6.81204	2385.69	5.63993		36951.7	5664.5	275645
OtterLake	MY08A148	ok	914.125	6.40697	0.169202	0.0069958		0.104221	17.2741	2.646	41.3638	916.919	113.359	6878.5	1.02845e+15		5.91011	0.041346	0.153157	0.00107715		3.57307	0.0354445	0.169202	0.0011837	0.70523			1007.71	7.04975	2381.47	5.99092		37296.3	5717.9	280047
OtterLake	MY08A146	ok	926.522	6.21282	0.171889	0.00668404		0.0991452	17.2726	2.6769	41.1636	899.423	111.555	6791.13	1.02438e+15		5.8177	0.0388857	0.154645	0.0010174		3.66511	0.0343736	0.171889	0.00114892	0.71269			1022.51	6.83451	2397.94	5.59461		37067.9	5749.92	274129
OtterLake	MY08A145	ok	914.775	6.29666	0.16821	0.00690582		0.0951904	18.0824	2.6818	43.1098	959.071	119.464	7019.38	1.07943e+15		5.94496	0.0410548	0.148096	0.000970926		3.43475	0.0327064	0.16821	0.00116163	0.725233			1002.24	6.92129	2324.05	5.6182		38561.2	5724.24	291824
OtterLake	MY08A137	ok	914.803	6.25402	0.168528	0.00685902		0.100499	17.3105	2.59419	41.3296	923.891	114.296	7017.55	1.03731e+15		5.93373	0.0406996	0.149522	0.000937666		3.47439	0.0322899	0.168528	0.00115594	0.73803			1004	6.88643	2340.47	5.36474		36879.3	5532.58	279768
OtterLake	MY08A144	ok	915.07	6.24434	0.168611	0.00684308		0.0866246	17.231	2.58578	40.7152	909.291	113.447	6974.15	1.02435e+15		5.93082	0.0405851	0.149668	0.00094641		3.47949	0.0324196	0.168611	0.00115382	0.734444			1004.45	6.87354	2342.14	5.40854		36673	5508.45	276681
OtterLake	MY08A138	ok	917.869	6.35239	0.169404	0.00694347		0.0937468	17.481	2.63885	41.8728	922.265	114.573	7035.81	1040695632652990		5.90305	0.0409876	0.150865	0.00094684		3.52381	0.0329813	0.169404	0.00117625	0.74186			1008.83	7.00475	2355.75	5.36045		36821	5564.02	277168
OtterLake	MY08A141	ok	924.232	6.51265	0.170661	0.00707977		0.102412	17.2518	2.60356	40.5928	892.144	112.301	6947.61	1.01887e+15		5.85957	0.0414844	0.151099	0.000943609		3.55548	0.0335654	0.170661	0.00120824	0.749938			1015.75	7.19129	2358.41	5.33239		36492.3	5512.62	272516
OtterLake	MY08A161	ok	909.665	6.33999	0.167303	0.00698553		0.0789979	16.7066	2.47955	39.4258	878.169	110.674	6847.71	9.86738e+14		5.97719	0.0417538	0.148356	0.00101229		3.42223	0.0334182	0.167303	0.0011687	0.715361			997.233	6.96619	2327.06	5.84541		37342.5	5545.96	281686
OtterLake	MY08A119	ok	907.343	6.27281	0.166897	0.00694147		0.107849	16.9621	2.51863	40.528	909.759	113.099	7085.93	1.01448e+15		5.99173	0.0415914	0.148504	0.000941356		3.41734	0.0321241	0.166897	0.00115851	0.73843			994.99	6.9067	2328.77	5.42941		35821.1	5325.97	276293
OtterLake	MY08A001	ok	905.799	6.26125	0.166865	0.00692808		0.0700484	16.9326	2.53096	40.0686	912.659	113.787	6879.5	1.01695e+15		5.99288	0.0415191	0.149697	0.00097442		3.44412	0.0327407	0.166865	0.00115605	0.72879			994.814	6.89215	2342.46	5.56736		33927	5088.11	276362
OtterLake	MY08A140	ok	916.408	6.30962	0.168833	0.00690002		0.1046	17.4295	2.61078	41.4439	923.774	114.679	7012.18	1.04039e+15		5.92301	0.0408689	0.149529	0.000985427		3.48085	0.0332127	0.168833	0.00116495	0.723156			1005.68	6.9392	2340.55	5.63767		36650.6	5495.37	276748
OtterLake	MY08A050	ok	926.27	6.73241	0.170985	0.00728245		0.0867723	17.0679	2.57324	40.2926	899.073	111.807	6886.73	1.02466e+15		5.84848	0.0425913	0.150819	0.00109044		3.55561	0.0364876	0.170985	0.00124519	0.709652			1017.53	7.41013	2355.23	6.17562		34554.2	5222.42	268977
OtterLake	MY08A163	ok	907.796	6.29513	0.167137	0.00697097		0.106349	17.2123	2.57654	41.1042	910.502	113.981	6978.43	1.01839e+15		5.9831	0.041708	0.149217	0.000901634		3.43869	0.0317228	0.167137	0.00116511	0.755639			996.32	6.94531	2336.97	5.17103		36883.8	5524.73	277916
OtterLake	MY08A098	ok	910.022	6.6382	0.167255	0.00734444		0.0952752	17.4029	2.57447	41.3876	929.253	116.063	7361	1.04118e+15		5.9789	0.0439117	0.147827	0.000969865		3.40906	0.0335727	0.167255	0.00122839	0.745773			996.968	7.32217	2320.94	5.62409		35928.5	5323.87	279421
OtterLake	MY08A008	ok	915.786	6.58498	0.167944	0.00725266		0.0922432	17.1031	2.49614	40.7296	924.958	114.145	7141.74	1.03877e+15		5.95436	0.0431849	0.146009	0.000917125		3.381	0.0324392	0.167944	0.00121804	0.755913			1000.77	7.25827	2299.7	5.39659		34756.6	5088.88	280369
OtterLake	MY08A048	ok	918.037	6.23046	0.169339	0.00678157		0.101062	17.2335	2.59892	41.2335	918.214	114.077	7130.65	1.03635e+15		5.90532	0.0400473	0.150426	0.00102594		3.51221	0.0337803	0.169339	0.00114838	0.705094			1008.47	6.83899	2350.77	5.82823		34487.9	5214.03	271499
OtterLake	MY08A179	ok	918.958	6.3356	0.168863	0.00692155		0.0855369	16.8821	2.48555	40.0935	892.215	110.424	7299.89	1.00668e+15		5.92196	0.0409892	0.147475	0.000968133		3.43364	0.0327555	0.168863	0.00116879	0.725563			1005.84	6.962	2316.86	5.62987		37702.8	5553.16	278958
OtterLake	MY08A025	ok	908.126	6.25082	0.166428	0.00689347		0.10176	17.4092	2.53594	41.7907	942.231	117.319	7194.42	1.05223e+15		6.00861	0.0414201	0.145663	0.00104309		3.34255	0.0332242	0.166428	0.00114727	0.693524			992.4	6.84108	2295.63	6.155		35775.1	5226.4	289378
OtterLake	MY08A027	ok	927.771	6.42135	0.170605	0.00694708		0.102133	17.262	2.55748	41.0921	916.528	113.316	7097.91	1.04415e+15		5.8615	0.0407203	0.147835	0.000987494		3.47751	0.0335144	0.170605	0.0011852	0.720842			1015.44	7.05436	2321.03	5.72598		35010.5	5201.94	275641
OtterLake	MY08A118	ok	906.829	5.9794	0.166749	0.00660584		0.10968	17.1099	2.5342	40.6166	921.447	114.209	7267.31	1.0258e+15		5.99705	0.0396156	0.148269	0.000918042		3.4089	0.0308641	0.166749	0.00110151	0.729606			994.172	6.56734	2326.06	5.30486		35936.8	5329.86	277595
OtterLake	MY08A180	ok	908.717	6.23984	0.166991	0.00688016		0.0875454	16.7556	2.47434	39.9334	897.66	110.908	7274.3	1.00037e+15		5.98836	0.0412009	0.147744	0.000999982		3.40176	0.0328313	0.166991	0.00114892	0.712876			995.508	6.84926	2319.98	5.80259		37290.9	5508.9	279109
OtterLake	MY08A007	ok	907.322	6.31043	0.166471	0.00698786		0.0955226	17.3226	2.53863	41.599	942.371	116.594	7372.11	1.04902e+15		6.00705	0.0419765	0.146561	0.00095967		3.36403	0.0322149	0.166471	0.00116328	0.729705			992.638	6.93642	2306.19	5.62178		34455	5065.7	280417
OtterLake	MY08A026	ok	915.769	6.24581	0.168744	0.00683221		0.103379	16.8423	2.52676	39.8552	895.96	111.888	7215.05	1.01048e+15		5.92613	0.0404886	0.149675	0.000975966		3.48239	0.0328892	0.168744	0.0011529	0.723412			1005.19	6.86766	2342.21	5.57716		34632.2	5210.71	276048
OtterLake	MY08A076	ok	918.137	6.34834	0.167777	0.00694625		0.0951691	18.0638	2.58324	42.6374	970.356	120.194	8034.31	1.09414e+15		5.96028	0.0414016	0.143213	0.00100819		3.31297	0.0327648	0.167777	0.00116542	0.702361			999.853	6.94523	2266.42	6.06975		37022.5	5305.2	289736
OtterLake	MY08A097	ok	905.91	6.23776	0.164642	0.00695707		0.0747959	19.2524	2.68209	46.4713	1066.2	130.765	8297.17	1181234487306023		6.07378	0.0422558	0.139272	0.000862396		3.1616	0.029446	0.164642	0.00114543	0.746978			982.522	6.83548	2218.18	5.36674		39232.9	5474.8	310866
OtterLake	MY08A075	ok	906.669	6.04347	0.165728	0.00667799		0.10666	17.8107	2.56163	42.5072	972.358	120.215	8031.47	1.0813e+15		6.03398	0.0402949	0.143688	0.00099805		3.28335	0.0316365	0.165728	0.00110673	0.693064			988.53	6.60139	2272.12	5.98519		36298.9	5231.39	288274
OtterLake	MY08A049	ok	904.752	6.26572	0.165237	0.00695869		0.0811763	17.5307	2.50752	42.0675	960.669	118.663	8035.42	1.06559e+15		6.0519	0.0421133	0.143077	0.00099118		3.25971	0.0320075	0.165237	0.00114984	0.708688			985.817	6.86	2264.78	5.97406		35202.7	5047.78	283266
OtterLake	MY20B248	ok	937.661	7.40918	0.173931	0.00798834		0.101167	17.411	2.69011	41.5225	905.071	112.904	6255.73	1.046e+15		5.74941	0.0459283	0.154303	0.000926087		3.70044	0.0369738	0.173931	0.00138942	0.799497			1033.73	8.25781	2394.17	5.10577		36279.4	5592.89	240542
OtterLake	MY29A126	ok	918.721	7.03306	0.170287	0.0077068		0.0698877	17.1759	2.65187	40.3651	883.094	111.367	6282.27	1.00288e+15		5.87244	0.0452577	0.154113	0.000992031		3.61844	0.0363343	0.170287	0.00131237	0.7675			1013.69	7.81232	2392.07	5.47729		36230	5589.92	271343
OtterLake	MY29A025	ok	918.309	6.34409	0.170032	0.00687854		0.115047	17.1915	2.6394	41.3613	896.169	112.383	6292.81	1.01519e+15		5.88126	0.0404545	0.153318	0.00111328		3.59438	0.0359509	0.170032	0.00116957	0.687717			1012.29	6.96304	2383.26	6.1842		36673	5615.22	280765
OtterLake	MY29A150	ok	909.726	6.5726	0.168359	0.0072392		0.108079	17.3676	2.6657	41.4946	897.279	112.19	6297.91	1.0054e+15		5.9397	0.0429987	0.153119	0.00102683		3.5544	0.0350748	0.168359	0.00121878	0.733604			1003.06	7.26136	2381.05	5.71268		35404.6	5432.98	263331
OtterLake	JL17C161	ok	944.586	9.20767	0.177526	0.00970201		0.0921498	17.623	2.88313	41.6424	889.729	109.664	6329.77	1.0318e+15		5.63299	0.0546513	0.164142	0.00179496		4.01775	0.0587351	0.177526	0.00172236	0.663662			1053.44	10.2205	2498.78	9.20487		13203.9	2146.42	87176.4
OtterLake	MY29A035	ok	917.505	6.77598	0.170021	0.00741592		0.0796433	16.9037	2.61111	39.953	874.377	110.324	6343.66	9.91787e+14		5.88164	0.0436178	0.153955	0.00100417		3.60907	0.0356438	0.170021	0.00126086	0.75089			1012.22	7.50658	2390.32	5.55098		35961.4	5541.13	274491
OtterLake	MY20B254	ok	912.293	7.55544	0.168503	0.00836684		0.0880548	16.2534	2.45948	38.4637	867.83	108.639	6347.74	9.75706e+14		5.9346	0.0496539	0.151568	0.00104704		3.52141	0.0382077	0.168503	0.00140984	0.771127			1003.86	8.39913	2363.69	5.89537		34942.9	5275.04	238201
OtterLake	MY29A024	ok	925.578	6.68707	0.171163	0.00726076		0.107718	17.3961	2.65324	41.3408	903.87	112.929	6352.15	1.03105e+15		5.84239	0.0424202	0.152205	0.000969991		3.59204	0.0347023	0.171163	0.00124277	0.751563			1018.52	7.3952	2370.85	5.43461		37283	5670.95	283488
OtterLake	MY29A033	ok	913.483	6.46331	0.169284	0.00706559		0.111172	17.5786	2.71121	42.158	922.496	115.199	6353.35	1037668576950624		5.90724	0.0417381	0.154078	0.00107087		3.59631	0.035643	0.169284	0.00119609	0.712904			1008.16	7.12327	2391.68	5.91416		37014.4	5694.42	283765
OtterLake	MY29A005	ok	912.794	6.15239	0.168601	0.00673632		0.104919	16.9569	2.5715	40.895	893.34	112.461	6364.08	1.007e+15		5.93117	0.0399543	0.151579	0.00098577		3.52371	0.0329935	0.168601	0.00113575	0.719438			1004.4	6.76594	2363.81	5.5499		36528.9	5522.37	284527
OtterLake	MY29A022	ok	922.023	6.58919	0.170229	0.007167		0.100917	17.1162	2.58648	40.9321	894.33	111.8	6377.54	1.01625e+15		5.87444	0.0421021	0.151038	0.00102332		3.54504	0.0349631	0.170229	0.00122003	0.726689			1013.37	7.26284	2357.71	5.7856		37061.5	5585.04	283628
OtterLake	MY29A102	ok	909.248	6.7451	0.168399	0.00744742		0.121285	17.5924	2.71752	41.7114	923.495	115.296	6377.7	1.03365e+15		5.93829	0.0442249	0.153712	0.00101287		3.569	0.0354904	0.168399	0.00125413	0.74893			1003.28	7.47186	2387.63	5.60951		36605.2	5647.97	277999
OtterLake	MY29A029	ok	906.564	6.67832	0.167575	0.00738239		0.0956632	17.2282	2.61648	41.0683	903.743	114.061	6405.58	1.01237e+15		5.96747	0.0440542	0.152284	0.00106835		3.51857	0.0358337	0.167575	0.00123711	0.72489			998.737	7.37307	2371.74	5.98205		35393.6	5361.26	274276
OtterLake	MY29A125	ok	902.111	7.1251	0.16715	0.00787973		0.131479	18.1396	2.79885	43.1503	937.117	117.536	6410.23	1041981653295798		5.98265	0.0471416	0.154198	0.00130682		3.55374	0.0411244	0.16715	0.0013171	0.680922			996.39	7.85128	2393.01	7.21063		35785.3	5517.66	267867
OtterLake	MY29A006	ok	922.369	6.56764	0.169842	0.00715874		0.0886392	17.7128	2.64397	41.8477	921.041	116.333	6414.55	1.05093e+15		5.88781	0.0421493	0.148999	0.000969932		3.48925	0.0337616	0.169842	0.00121586	0.739853			1011.24	7.23923	2334.47	5.57231		37676.2	5606.53	290572
OtterLake	JL17C160	ok	916.975	9.62213	0.171419	0.010477		0.105719	16.8585	2.70042	39.9539	874.946	108.372	6417.86	9.85237e+14		5.83366	0.0611194	0.160638	0.00188233		3.79672	0.0596793	0.171419	0.00179596	0.666535			1019.93	10.6858	2462.39	9.89952		12657.6	2014.55	86331
OtterLake	MY20B247	ok	942.534	7.36803	0.175222	0.00789562		0.105825	18.5278	2.88547	44.2578	964.319	119.275	6422.76	1.11714e+15		5.70705	0.0450607	0.155894	0.000923748		3.76634	0.0371805	0.175222	0.00138348	0.799817			1040.82	8.2179	2411.61	5.03188		38021.5	5908.3	250372
OtterLake	MY29A101	ok	909.633	6.74596	0.169036	0.00743189		0.100682	17.856	2.80225	42.9077	925.516	116.362	6424.07	1.039e+15		5.9159	0.0439663	0.156261	0.00103217		3.64193	0.0362119	0.169036	0.00125626	0.747445			1006.8	7.48241	2415.6	5.60699		36911.3	5785.98	278777
OtterLake	MY29A077	ok	916.563	6.52167	0.169784	0.00715799		0.111058	17.8084	2.73704	42.5384	917.658	115.733	6424.62	1039587456511306		5.88982	0.0421593	0.153698	0.00087277		3.59805	0.0328748	0.169784	0.00121532	0.78342			1010.92	7.23619	2387.48	4.83411		37338.1	5729.2	282144
OtterLake	MY29A037	ok	929.971	6.32222	0.172164	0.00677471		0.0980356	17.7599	2.72112	42.6915	912.435	114.387	6430.73	1.04729e+15		5.80841	0.0393503	0.152954	0.00107819		3.63082	0.035498	0.172164	0.00116636	0.692934			1024.02	6.93747	2379.21	6.00607		37541.4	5737.91	282703
OtterLake	MY29A078	ok	913.153	6.35979	0.169569	0.0069715		0.106759	17.7717	2.76607	42.3512	916.692	115.641	6432.01	1.03454e+15		5.89732	0.0411132	0.155641	0.000950128		3.6389	0.0337199	0.169569	0.00118215	0.752333			1009.73	7.03936	2408.85	5.18547		36931.7	5738.9	279391
OtterLake	Ma01D030	ok	901.313	13.5969	0.176883	0.0148481		0.186705	19.2456	3.79203	44.4258	913.289	118.031	6433.03	1.02568e+15		5.65344	0.083943	0.197029	0.00313549		4.80527	0.104587	0.176883	0.00262639	0.6822			1049.93	15.5894	2801.74	13.0151		15798.5	3114.87	117869
OtterLake	MY29A004	ok	913.136	6.3375	0.167759	0.00698129		0.0941479	17.0477	2.5196	40.3601	904.846	113.442	6440.06	1.01886e+15		5.96095	0.0416151	0.147446	0.000915889		3.4105	0.0318702	0.167759	0.00117117	0.747084			999.75	6.97955	2316.51	5.32733		36992.5	5450.27	289144
OtterLake	MY29A272	ok	919.031	6.7848	0.169775	0.00741238		0.116593	17.9351	2.71491	42.3687	928.371	115.138	6451.1	1048344062914486		5.89015	0.04366	0.151546	0.00104178		3.54747	0.0358629	0.169775	0.00125844	0.733215			1010.87	7.49296	2363.44	5.86676		36064.2	5460.3	265805
OtterLake	MY29A030	ok	912.081	6.64315	0.167929	0.00730354		0.111201	17.7445	2.63662	42.0061	934.429	116.896	6453.54	1.05007e+15		5.9549	0.0434919	0.149134	0.00107594		3.45305	0.0354492	0.167929	0.00122647	0.711426			1000.69	7.30857	2336.02	6.17474		36838.1	5459.53	284015
OtterLake	MY29A038	ok	916.991	6.17149	0.169178	0.00675403		0.119984	17.226	2.59928	41.503	909.813	112.98	6465.68	1.02546e+15		5.91093	0.0399226	0.150594	0.000887592		3.5128	0.0314891	0.169178	0.00114263	0.753452			1007.58	6.80523	2352.68	5.03567		36829.1	5543.77	282379
OtterLake	MY29A151	ok	915.596	6.65965	0.16911	0.00732014		0.119651	17.8864	2.70883	42.1657	929.331	116.542	6469.54	1.04949e+15		5.91332	0.0432863	0.15148	0.000935008		3.53205	0.0338199	0.16911	0.00123791	0.764492			1007.2	7.37287	2362.71	5.26814		37588.9	5691.6	281962
OtterLake	MY29A273	ok	907.873	6.51408	0.167419	0.00719996		0.0919023	17.648	2.64927	41.7871	929.958	116.235	6482.33	1.03966e+15		5.97302	0.0430055	0.150441	0.00100413		3.47275	0.0340948	0.167419	0.00120541	0.733358			997.877	7.18467	2350.95	5.70365		36652.9	5503.44	277119
OtterLake	JL17C092	ok	913.786	8.57948	0.17135	0.00930736		0.106686	17.1703	2.78714	40.5858	891.385	109.791	6485.89	9.98083e+14		5.836	0.0543178	0.163035	0.00179069		3.85182	0.0554534	0.17135	0.00159482	0.646494			1019.55	9.48929	2487.38	9.25587		13012.5	2094.44	88386
OtterLake	MY29A053	ok	918.642	6.70544	0.170134	0.00730888		0.0995159	18.0809	2.77131	43.0029	936.59	117.539	6508.58	1.06166e+15		5.8777	0.0429594	0.153496	0.00107299		3.60074	0.0364163	0.170134	0.00124349	0.722681			1012.85	7.40281	2385.25	5.95224		37031.9	5663.94	280838
OtterLake	SE18C003	ok	905.154	25.0522	0.218208	0.0249146		0.447257	22.8544	7.65799	53.0222	943.404	118.721	6519.02	1.05396e+15		4.58279	0.114178	0.335977	0.00789768		10.1084	0.346246	0.218208	0.00543655	0.72736			1272.4	31.7013	3644.57	17.9822		15249.1	5075.08	82266.5
OtterLake	MY29A054	ok	907.349	6.29258	0.168235	0.00692996		0.110589	18.1135	2.80019	43.5045	945.741	119.162	6524.31	1.05973e+15		5.94408	0.0411922	0.154603	0.000997818		3.5862	0.033961	0.168235	0.00116586	0.731787			1002.38	6.94643	2397.47	5.48872		36771.2	5672.58	282166
OtterLake	MY20B163	ok	930.384	7.8616	0.175117	0.00841569		0.077565	12.2703	2.03153	24.1971	511.978	79.3798	6525.43	6.38217e+14		5.71046	0.0480574	0.165543	0.00140227		3.99707	0.0477272	0.175117	0.00147373	0.704799			1040.24	8.75438	2513.08	7.12008		24342.4	4029.64	166837
OtterLake	MY29A023	ok	926.551	6.54327	0.170467	0.00708839		0.0878867	18.0356	2.6661	43.0131	940.493	117.551	6532.28	1.07416e+15		5.86625	0.0415822	0.148251	0.00101781		3.48448	0.0343853	0.170467	0.00120833	0.718313			1014.68	7.19246	2325.85	5.88221		38355.6	5654.38	292859
OtterLake	JA17A144	ok	929.6	9.19333	0.173595	0.00981122		0.0962947	17.3229	2.76487	41.0217	883.508	110.355	6532.92	1.01232e+15		5.76052	0.0565177	0.159581	0.001951		3.81963	0.0598754	0.173595	0.00170318	0.625886			1031.89	10.1241	2451.23	10.3402		16267.8	2668.68	131991
OtterLake	Ma01D021	ok	926.522	8.92988	0.174011	0.0094555		0.126135	17.0355	2.77823	40.7098	876.542	108.868	6549.35	9.98815e+14		5.74678	0.0543386	0.163969	0.00212496		3.93405	0.0631112	0.174011	0.00164536	0.589411			1034.17	9.7786	2497.01	10.9106		15147.3	2471.05	117553
OtterLake	Ma01D029	ok	921.093	8.33319	0.172776	0.00897292		0.0940792	17.5303	2.84043	41.6789	912.464	112.339	6551.69	1.03011e+15		5.78784	0.0519338	0.163134	0.00169385		3.88623	0.0533312	0.172776	0.0015503	0.653854			1027.39	9.21867	2488.4	8.7491		15565.9	2523.7	121325
OtterLake	JA17A145	ok	929.29	8.99493	0.173732	0.00961744		0.108056	17.262	2.76461	40.8074	875.564	109.796	6552.21	1004299722669508		5.756	0.055358	0.160438	0.00184573		3.84315	0.0576273	0.173732	0.00167085	0.641385			1032.64	9.93135	2460.28	9.72119		16271.9	2678.48	131853
OtterLake	Fe06C003	ok	901.67	9.46641	0.167202	0.0104332		0.121663	17.083	2.65743	40.6456	896.045	112.484	6557.62	9.96122e+14		5.98078	0.0623985	0.154817	0.00206591		3.56913	0.0604564	0.167202	0.00174445	0.615937			996.679	10.3985	2399.82	11.3455		12932.2	1979.69	95180.5
OtterLake	JL17C091	ok	905.368	9.26994	0.168255	0.0101738		0.0578057	16.4418	2.56252	38.7081	882.155	108.874	6572.87	978905475542606		5.94336	0.0604664	0.156401	0.00199547		3.62835	0.0592089	0.168255	0.00171179	0.623454			1002.49	10.1991	2417.12	10.8285		13202.5	2040.25	92868.3
OtterLake	MY14A007	ok	920.25	8.14343	0.170948	0.00882728		0.112198	17.0459	2.6604	40.3536	889.968	111.281	6579.22	1.00934e+15		5.84974	0.0516373	0.155767	0.00155958		3.67147	0.0490065	0.170948	0.001509	0.661323			1017.33	8.98026	2410.22	8.50359		16980.4	2655.2	128935
OtterLake	JA23A013	ok	913.742	9.3168	0.170991	0.0100911		0.0962211	16.9725	2.73774	40.4352	908.879	112.522	6599.28	1.01949e+15		5.84826	0.0590153	0.161484	0.00206173		3.8072	0.0619575	0.170991	0.00172549	0.620083			1017.57	10.2684	2471.26	10.7766		13195.7	2168.38	109102
OtterLake	JA17A119	ok	909.243	13.095	0.173648	0.0134039		0.124969	17.8515	3.30328	42.4169	897.631	111.98	6605.82	1.00441e+15		5.75876	0.0771901	0.176857	0.00463728		4.23443	0.124695	0.173648	0.00232757	0.455175			1032.18	13.8353	2623.62	21.8033		16569.4	3152.78	131446
OtterLake	AU28A032	ok	911.231	8.76502	0.170314	0.00960035		0.0910146	16.3686	2.62416	38.6849	827.014	104.497	6606.24	931810312900236		5.87152	0.0563686	0.160613	0.00167507		3.77165	0.0534639	0.170314	0.00163507	0.677264			1013.84	9.73321	2462.12	8.81113		16315.5	2613.22	110496
OtterLake	JA17A120	ok	926.478	8.84367	0.173035	0.00949163		0.0928755	17.4302	2.79445	41.0067	881.196	110.612	6607.47	1.00791e+15		5.77917	0.0548538	0.159744	0.00179361		3.81117	0.0560334	0.173035	0.00164239	0.645584			1028.81	9.76511	2452.95	9.49479		16207.6	2671.89	130114
OtterLake	MY14A227	ok	884.244	13.3877	0.174486	0.0144094		0.192152	17.5951	3.72217	41.7987	888.014	109.727	6608.7	9.61719e+14		5.73112	0.0825819	0.201247	0.00409441		4.84161	0.120707	0.174486	0.00251423	0.577969			1036.78	14.9394	2836.33	16.5875		18567.1	3869.59	131283
OtterLake	JL17C025	ok	957.587	8.87125	0.178209	0.00918092		0.099652	17.6589	2.76591	41.7351	897.268	109.548	6617.99	1052042189337048		5.61138	0.0515177	0.156399	0.00187672		3.84295	0.0580629	0.178209	0.00163612	0.607649			1057.18	9.70592	2417.1	10.1843		12972	2010.04	85596
OtterLake	JL17C139	ok	914.504	11.7344	0.184392	0.0116629		0.192648	17.5017	3.83766	41.3339	856.241	104.389	6634.57	9.56036e+14		5.42322	0.0632504	0.216367	0.00411694		5.50091	0.122767	0.184392	0.00215055	0.522588			1090.93	12.7233	2953.85	15.3538		13131.8	2859.34	83132.8
OtterLake	JA30A016	ok	956.637	10.1008	0.179205	0.0105099		0.114667	17.5974	2.84995	41.7544	926.359	115.477	6634.85	1.09313e+15		5.58019	0.058647	0.161431	0.00203479		3.98878	0.0654616	0.179205	0.00188342	0.640399			1062.63	11.1681	2470.71	10.6398		12599.3	2075.38	106546
OtterLake	Ap19D440	ok	909.771	13.3893	0.179577	0.0142259		0.0709863	9.11691	1.83041	19.2216	396.957	57.6346	6643.3	4.70653e+14		5.56864	0.0792187	0.201105	0.00358545		4.97939	0.113573	0.179577	0.00255464	0.623703			1064.66	15.1458	2835.19	14.5373		8046.23	1595.49	51515.5
OtterLake	Ma01D022	ok	926.411	8.43246	0.174139	0.00892916		0.11177	17.7633	2.91407	42.1269	920.967	113.471	6650.67	1046290528462641		5.74252	0.0512759	0.164621	0.00196824		3.95262	0.0589828	0.174139	0.00155492	0.59837			1034.88	9.2406	2503.69	10.0592		15749.7	2584.63	122200
OtterLake	JA17A225	ok	933.771	8.61512	0.173559	0.00914641		0.110807	17.1626	2.67059	40.9766	896.221	111.863	6652.37	1031468206810648		5.76172	0.052699	0.155928	0.0018377		3.73141	0.0556664	0.173559	0.00158745	0.613099			1031.69	9.43628	2411.97	10.0079		16008	2557.21	135236
OtterLake	JA23A027	ok	912.986	8.9827	0.16925	0.0097623		0.103496	17.0632	2.62917	40.818	897.714	112.313	6654.95	1009895548913090		5.90842	0.0576797	0.154351	0.00196319		3.60197	0.0577525	0.16925	0.00165227	0.608865			1007.98	9.84018	2394.7	10.8197		13474.7	2111.81	111182
OtterLake	Jl14C139	ok	939.327	13.8171	0.179737	0.0144825		0.130597	18.4189	3.28627	43.3169	886.011	112.774	6657.42	1.03341e+15		5.56369	0.0805765	0.177753	0.00326712		4.4051	0.10308	0.179737	0.00260304	0.618907			1065.54	15.4317	2632.02	15.2714		16774.7	2999.81	105313
OtterLake	Fe06C002	ok	909.26	9.97908	0.169124	0.0109926		0.0927682	17.822	2.79279	42.432	919.921	116.076	6667.53	1033618560455101		5.91281	0.064997	0.156978	0.00191074		3.66054	0.0600368	0.169124	0.00185911	0.670234			1007.28	11.0726	2423.36	10.324		13516.9	2084.96	98474
OtterLake	SE24A227	ok	897.138	6.26436	0.167563	0.00688361		0.0922114	17.6533	2.82911	41.5899	886.599	110.91	6667.99	9.79189e+14		5.96792	0.0410808	0.160369	0.00124696		3.70508	0.0384765	0.167563	0.00115343	0.662854			998.667	6.87443	2459.55	6.5709		35868.3	5538.29	181996
OtterLake	JA17A209	ok	929.164	9.30759	0.171808	0.00998979		0.091874	16.9032	2.56262	39.9756	891.415	110.748	6670.74	1.01891e+15		5.82046	0.0581452	0.152048	0.00189869		3.60185	0.0575993	0.171808	0.00171632	0.624689			1022.06	10.2102	2369.09	10.6508		15565.7	2423.13	131799
OtterLake	Fe06C004	ok	912.85	9.78867	0.170335	0.0107076		0.100145	17.8185	2.82737	42.3138	924.321	115.158	6671.43	1.0381e+15		5.87079	0.0628623	0.159327	0.00194074		3.74192	0.0606867	0.170335	0.00182388	0.660228			1013.95	10.8571	2448.53	10.3051		13323.9	2079.98	96182.9
OtterLake	JA30A003	ok	933.639	9.41944	0.174236	0.0100288		0.114841	17.4424	2.78401	41.6707	941.848	116.665	6676.87	1.08085e+15		5.73934	0.0575586	0.159004	0.00195514		3.81986	0.0606109	0.174236	0.00174738	0.632041			1035.41	10.3839	2445.1	10.4062		12528.2	2036.91	108289
OtterLake	SE24A280	ok	914.119	6.61315	0.170485	0.00716103		0.108965	17.2168	2.73335	41.3308	928.279	118.395	6691.74	1.05297e+15		5.86563	0.042004	0.158914	0.00127195		3.73551	0.0401188	0.170485	0.00122085	0.666771			1014.78	7.26688	2444.14	6.77447		36827.7	5567.52	189143
OtterLake	MY14A174	ok	920.497	8.22831	0.169854	0.00895362		0.0751795	17.2694	2.59658	40.9395	902.262	111.871	6705.37	1.02047e+15		5.8874	0.0527136	0.150651	0.00151235		3.52818	0.0474594	0.169854	0.00152081	0.66562			1011.31	9.05486	2353.33	8.57634		18428.9	2740.45	136157
OtterLake	JL17C204	ok	909.391	9.55295	0.172252	0.0101205		0.15685	16.1659	2.77641	38.4133	845.797	104.395	6709.19	9.42965e+14		5.80545	0.058754	0.170699	0.00270065		4.05412	0.0761409	0.172252	0.00174327	0.538864			1024.51	10.3685	2564.51	13.2313		12838.3	2193.43	87904.5
OtterLake	SE30B418	ok	925.989	11.7371	0.181025	0.0124589		0.181932	17.9017	3.46878	42.0779	893.771	111.535	6725.26	1.01957e+15		5.5241	0.0688241	0.193838	0.0026145		4.83813	0.0888363	0.181025	0.00225537	0.678525			1072.57	13.363	2775	11.0581		32365.7	6138.97	181171
OtterLake	AU28A018	ok	909.668	9.08309	0.17028	0.00993484		0.121785	17.2042	2.78039	40.761	872.338	109.33	6725.65	9.78222e+14		5.87267	0.0583441	0.161795	0.00184695		3.79867	0.0574857	0.17028	0.00169171	0.656496			1013.65	10.0705	2474.51	9.63223		16859.2	2727.74	113688
OtterLake	JL17C071	ok	902.017	8.48049	0.165608	0.00944773		0.0900324	16.401	2.41068	38.5916	884.08	108.647	6727.94	9.75746e+14		6.03835	0.0570487	0.147191	0.00152617		3.36097	0.0471456	0.165608	0.00156462	0.673521			987.867	9.33311	2313.55	8.89518		12756.4	1857.91	89800.1
OtterLake	Jl14C176	ok	894.067	8.26065	0.163953	0.009243		0.0951457	15.6369	2.30411	37.3584	850.479	106.721	6730.59	936969717479925		6.0993	0.0563758	0.146455	0.00163044		3.31074	0.0479052	0.163953	0.00151542	0.638786			978.709	9.04621	2304.94	9.55938		18458.5	2725.65	128509
OtterLake	Ma01D016	ok	908.873	8.63086	0.169294	0.00941797		0.103782	16.4113	2.58414	38.6975	876.197	108.693	6736.48	9.78034e+14		5.90687	0.0556307	0.158072	0.00184974		3.68977	0.0554242	0.169294	0.00159441	0.626986			1008.22	9.4954	2435.15	9.91329		14188	2234.3	113997
OtterLake	SE30B420	ok	910.153	7.53539	0.169796	0.00833273		0.108844	17.7165	2.82195	42.3464	905.894	112.838	6749.8	1.01417e+15		5.8894	0.0490748	0.159226	0.00107975		3.72772	0.0400482	0.169796	0.00141487	0.775618			1010.99	8.4243	2447.46	5.7376		28019.2	4369.17	160299
OtterLake	SE30B419	ok	908.662	8.06683	0.169404	0.00897093		0.143973	17.5572	2.78715	41.8548	901.914	111.954	6750.19	1.00672e+15		5.90304	0.0529557	0.158746	0.00107672		3.7079	0.0417006	0.169404	0.00151971	0.797668			1008.83	9.05012	2442.34	5.74181		27921.9	4339.1	159944
OtterLake	SE24A203	ok	880.668	6.25811	0.16364	0.00701541		0.0862257	17.4453	2.73925	41.3673	882.276	109.12	6754.2	951774201956767		6.11098	0.042871	0.156802	0.00128028		3.53786	0.0380847	0.16364	0.001148	0.651693			976.973	6.85386	2421.46	6.92668		36803.2	5597.11	192234
OtterLake	Ma01D015	ok	932.223	9.07311	0.173838	0.00966029		0.112197	17.5869	2.78805	41.4643	921.439	113.509	6772.05	1.05366e+15		5.75249	0.0555707	0.158446	0.00191105		3.79775	0.0586865	0.173838	0.00167932	0.625141			1033.22	9.98122	2439.14	10.2136		15055.1	2386.86	117856
OtterLake	JA23A024	ok	911.574	9.78401	0.173901	0.0103849		0.153219	17.8115	3.15903	42.4993	916.038	114.606	6781.37	1.02884e+15		5.75041	0.0597176	0.175989	0.00263165		4.21975	0.0768245	0.173901	0.00180595	0.570416			1033.57	10.7335	2615.43	12.4442		13818.6	2493.65	111344
OtterLake	Ma01D008	ok	915.276	8.84267	0.170581	0.00958929		0.0881899	16.9509	2.69196	40.1233	909.496	113.364	6785.64	1.02447e+15		5.86232	0.0562155	0.158361	0.00187461		3.7246	0.0567415	0.170581	0.00163575	0.629455			1015.31	9.73612	2438.23	10.0252		14412.1	2288.29	116735
OtterLake	SE30B441	ok	914.908	7.6344	0.171556	0.00838007		0.141783	17.7073	2.89428	41.9222	895.703	111.178	6803.88	1.00699e+15		5.82901	0.0488475	0.162992	0.00112804		3.85542	0.0419025	0.171556	0.00143765	0.771045			1020.68	8.55334	2486.93	5.83248		29331.8	4698.78	165078
OtterLake	Jl14C065	ok	903.747	13.6929	0.198518	0.0141752		0.292643	19.5304	5.45376	45.3968	863.205	109.966	6806.25	9.67076e+14		5.03732	0.071405	0.275681	0.00363711		7.54586	0.146124	0.198518	0.00281404	0.732008			1167.36	16.5475	3338.64	10.3187		21873.2	6125.39	128171
OtterLake	Jl14C066	ok	916.944	14.4912	0.173602	0.0152064		0.129322	17.2038	3.03495	40.6443	874.071	111.189	6808.9	9.93747e+14		5.76031	0.0875936	0.17021	0.0043344		4.07419	0.120839	0.173602	0.00263986	0.512696			1031.93	15.6919	2559.71	21.3065		18599.4	3290.48	125071
OtterLake	SE24A152	ok	906.607	6.76378	0.169275	0.00740365		0.114012	17.9416	2.86456	42.6654	881.073	106.493	6818.03	9.7188e+14		5.90753	0.0437373	0.159928	0.00125751		3.73266	0.0403128	0.169275	0.00125326	0.685522			1008.12	7.46375	2454.89	6.64786		36015.9	5631.4	190951
OtterLake	MY14A228	ok	920.127	13.8259	0.193751	0.0138278		0.237159	19.6137	5.07494	46.2291	921.044	112.615	6827.07	1.0361e+15		5.16127	0.0713689	0.246835	0.0043549		6.59403	0.147813	0.193751	0.00267914	0.616868			1141.66	15.7866	3164.58	13.9885		20769.4	5293.94	135193
OtterLake	SE18C037	ok	911.592	9.57362	0.171026	0.0103978		0.0964387	16.6365	2.70889	39.4348	877.813	109.415	6835.97	9.84603e+14		5.84707	0.0607965	0.163462	0.00210883		3.85461	0.0638692	0.171026	0.00177828	0.627522			1017.76	10.5824	2491.79	10.867		13561.1	2183.45	93465.8
OtterLake	OC02B015	ok	916.55	9.13562	0.170009	0.00992665		0.112035	17.5945	2.73289	42.0463	929.508	116.192	6846.99	1.04963e+15		5.88203	0.0583889	0.154719	0.00188943		3.62674	0.0570762	0.170009	0.00168762	0.630761			1012.16	10.0474	2398.74	10.3841		13577.9	2091.29	94952.2
OtterLake	AU28A033	ok	910.438	9.43484	0.169117	0.0103893		0.109459	17.1206	2.67516	40.5199	874.148	110.533	6856.26	9.84278e+14		5.91305	0.0614322	0.155937	0.00175037		3.63612	0.0556142	0.169117	0.00175701	0.679261			1007.25	10.4646	2412.07	9.53167		16903.8	2638.47	115772
OtterLake	AP24C002	ok	903.986	9.16843	0.169268	0.0101534		0.123302	17.685	2.85625	41.7498	901.18	114.273	6858.93	1.0082e+15		5.90779	0.0599839	0.162139	0.00167835		3.7841	0.0548682	0.169268	0.00171864	0.700247			1008.08	10.2354	2478.09	8.73126		15473.9	2471.69	103385
OtterLake	Fe06C020	ok	913.213	12.8887	0.176503	0.0131744		0.137677	18.4187	3.44646	43.5587	928.566	116.267	6864.11	1.04518e+15		5.66564	0.0746415	0.185647	0.00439923		4.51794	0.122494	0.176503	0.00232532	0.485912			1047.84	13.8047	2703.98	19.5555		13735.8	2518.67	95790.5
OtterLake	SE30B442	ok	909.132	7.2657	0.169331	0.00805922		0.106579	17.6543	2.78915	41.7582	905.571	112.055	6871.18	1.01021e+15		5.90561	0.0475946	0.158014	0.000948018		3.6892	0.0370661	0.169331	0.00136467	0.802136			1008.42	8.1271	2434.52	5.08292		29367.8	4547.53	167067
OtterLake	JA23A017	ok	904.904	8.6765	0.166447	0.0095552		0.0542135	17.286	2.56012	41.2619	932.596	117.045	6874.58	1.04057e+15		6.00792	0.0574069	0.148551	0.00182059		3.40921	0.0529803	0.166447	0.00159043	0.614863			992.504	9.48357	2329.32	10.4966		13360.9	2014.9	112999
OtterLake	NO12B505	ok	914.038	6.71516	0.16995	0.00736025		0.0809601	16.9027	2.65208	40.3545	885.177	109.517	6881.88	9.93011e+14		5.88409	0.0433083	0.156596	0.00102218		3.66946	0.0360993	0.16995	0.00125087	0.748162			1011.84	7.44736	2419.23	5.53881		33395	5278.72	275747
OtterLake	NO12B534	ok	914.647	6.38472	0.169699	0.00699628		0.119479	16.9755	2.64079	40.3591	895.422	110.531	6888.52	1.00438e+15		5.89279	0.0412276	0.154951	0.000929767		3.62555	0.0334167	0.169699	0.00118726	0.759064			1010.45	7.06941	2401.29	5.10091		33479.9	5248.7	278022
OtterLake	OC02B016	ok	906.127	8.77272	0.167863	0.00958559		0.0769398	17.1657	2.64998	41.0027	917.381	114.639	6888.79	1.02345e+15		5.95723	0.0571036	0.153971	0.00197726		3.56366	0.057107	0.167863	0.00160907	0.598173			1000.33	9.58873	2390.51	10.9288		13271.8	2031.93	93904.1
OtterLake	MY29A026	ok	910.558	7.65241	0.171031	0.00824523		0.101459	17.973	2.96101	43.5121	955.693	116.686	6895.94	1.0628e+15		5.8469	0.0482091	0.164362	0.00174856		3.87593	0.0521685	0.171031	0.00141019	0.61259			1017.79	8.3919	2501.03	8.95293		37537	6167.62	285369
OtterLake	Ma01D009	ok	927.974	8.01266	0.171804	0.0085876		0.0880734	17.8714	2.73542	42.5295	955.475	118.289	6896.22	1.08929e+15		5.8206	0.049985	0.153036	0.00162178		3.62516	0.0494474	0.171804	0.00147538	0.629586			1022.04	8.77687	2380.13	9.02845		14723	2253.12	118050
OtterLake	SE17A059	ok	998.573	41.2199	0.27454	0.0381781		0.679422	25.553	11.2525	58.093	856.932	105.252	6901.85	1.05236e+15		3.64246	0.139062	0.417906	0.00984089		15.8192	0.70959	0.27454	0.0104814	0.851121			1563.8	59.703	3974.79	17.6304		56373.7	24574.8	263557
OtterLake	Ap24a003	ok	912.901	7.09055	0.169134	0.00777774		0.0981272	16.2418	2.50242	38.5538	893.119	112.919	6902.94	1008453915837285		5.91249	0.0459858	0.153899	0.00118434		3.58894	0.0392681	0.169134	0.00131548	0.710853			1007.34	7.8348	2389.7	6.54975		30721.6	4693.83	234457
OtterLake	SE18C002	ok	925.078	9.66338	0.17075	0.0104189		0.113416	16.7053	2.54529	40.0451	919.329	115.187	6905.46	1.04916e+15		5.85652	0.0610183	0.150778	0.00200284		3.54977	0.059927	0.17075	0.00177902	0.617161			1016.24	10.5881	2354.77	11.3465		12702.8	1922.67	90933.6
OtterLake	OC02B004	ok	909.441	9.18677	0.167866	0.010061		0.090839	17.2166	2.60582	40.9045	920.435	115.757	6909.48	1.03317e+15		5.95713	0.0599344	0.151125	0.00194366		3.49785	0.0571163	0.167866	0.00168889	0.616141			1000.34	10.0644	2358.7	10.9816		13225.4	1981.65	93652.6
OtterLake	JL17C070	ok	908.786	8.72451	0.167617	0.00956132		0.101803	16.6175	2.50285	39.4604	882.342	108.836	6911.28	9.82797e+14		5.96599	0.0570427	0.150554	0.00182734		3.47945	0.0537614	0.167617	0.00160264	0.618811			998.967	9.55144	2352.23	10.3705		12530.3	1870	87212.6
OtterLake	SE18C038	ok	900.569	9.09992	0.169381	0.00998383		0.106383	16.3644	2.70678	39.0621	873.179	108.837	6913.16	9.66977e+14		5.90386	0.0589431	0.165565	0.00202896		3.86663	0.0611194	0.169381	0.00169107	0.631613			1008.7	10.0707	2513.3	10.3006		13311.2	2176.92	92795.6
OtterLake	SE24A176	ok	889.673	6.66074	0.165535	0.00743187		0.100939	17.7617	2.80297	42.2097	882.396	108.055	6913.91	9.58705e+14		6.04104	0.0448962	0.157628	0.00126643		3.59768	0.0393749	0.165535	0.00123023	0.679049			987.46	7.33868	2430.37	6.80962		36521.8	5615.15	192386
OtterLake	OC02B005	ok	904.722	8.50217	0.168003	0.00927903		0.114995	17.3703	2.71887	41.3116	923.813	116.533	6914.86	1.03245e+15		5.95227	0.0552313	0.155818	0.00195507		3.60941	0.0563265	0.168003	0.00155891	0.594601			1001.1	9.28923	2410.78	10.6559		13377.1	2073.15	94565.9
OtterLake	SE30B443	ok	904.035	7.45849	0.168418	0.00831631		0.108399	17.5313	2.77703	41.5888	900.515	112.086	6917.63	1.00077e+15		5.93762	0.0493791	0.158281	0.00101934		3.67552	0.0386603	0.168418	0.00140061	0.79065			1003.39	8.34447	2437.38	5.45448		29360.3	4558.62	168226
OtterLake	SE24A103	ok	928.947	6.55525	0.172797	0.00699076		0.121463	17.9732	2.81958	42.6759	903.765	107.039	6920.95	1015450906001635		5.78715	0.0404566	0.156618	0.00124488		3.73146	0.0394988	0.172797	0.00120798	0.660418			1027.5	7.18302	2419.47	6.74441		36193	5618.96	204539
OtterLake	JA23A014	ok	922.353	9.59698	0.17246	0.0104177		0.114628	18.3113	2.93058	44.6159	990.074	120.538	6922.04	1114882960591210		5.79845	0.0604068	0.160686	0.00177397		3.82091	0.0579987	0.17246	0.00179664	0.686313			1025.65	10.685	2462.89	9.32639		14065.7	2292.99	115517
OtterLake	AP24C003	ok	919.145	8.48535	0.172451	0.00913455		0.110711	18.3446	2.98423	43.0267	924.357	117.012	6933.83	1051696398863600		5.79875	0.052969	0.16335	0.00180089		3.88405	0.0556091	0.172451	0.00157526	0.638009			1025.6	9.36841	2490.63	9.2876		15969.2	2568.63	105240
OtterLake	NO12B590	ok	912.158	6.23403	0.169009	0.00682131		0.101198	17.0804	2.62902	40.5115	894.424	111.068	6934.76	1.00253e+15		5.91684	0.0403607	0.153973	0.00101443		3.58804	0.0340272	0.169009	0.00115286	0.719282			1006.65	6.86667	2390.53	5.60694		33359.5	5177.63	277060
OtterLake	NO12B563	ok	914.029	6.85948	0.169239	0.00757137		0.0912524	16.9803	2.60799	40.3947	893.781	110.347	6943.59	1.00189e+15		5.90879	0.0447376	0.153409	0.000879455		3.57977	0.0339965	0.169239	0.00128137	0.797252			1007.92	7.63133	2384.28	4.8819		33067.1	5119.73	274266
OtterLake	NO12B617	ok	909.311	7.0465	0.168397	0.00779435		0.124791	16.6862	2.56076	39.8715	877.258	108.934	6947.05	9.80065e+14		5.93836	0.0462856	0.15365	0.0010407		3.56753	0.0368385	0.168397	0.00131254	0.754822			1003.27	7.81985	2386.95	5.76634		32599.1	5046.13	272007
OtterLake	AU20B029	ok	922.891	8.60156	0.173421	0.00922228		0.0922663	16.7925	2.7526	40.3189	863.161	108.531	6947.57	9.83864e+14		5.76633	0.0531787	0.164441	0.00181732		3.93198	0.0565969	0.173421	0.00159933	0.640705			1030.93	9.50753	2501.84	9.29975		17373	2848.75	115307
OtterLake	Ap24a036	ok	910.301	7.68192	0.1696	0.00838096		0.0966805	16.4205	2.60034	38.9699	917.392	116.06	6958.39	1.033e+15		5.89623	0.0494161	0.15822	0.00153542		3.69987	0.0474415	0.1696	0.00142141	0.653615			1009.91	8.46398	2436.72	8.21983		28775.9	4509.14	221008
OtterLake	JA23A009	ok	919.991	8.90827	0.170042	0.0096042		0.11995	17.7365	2.68888	42.2415	953.718	119.753	6958.92	1.08296e+15		5.8809	0.0564813	0.15193	0.00196257		3.56206	0.0573375	0.170042	0.00163312	0.596656			1012.34	9.72275	2367.76	11.0192		13356.5	2063.8	112283
OtterLake	Ap24a054	ok	929.307	8.15114	0.173034	0.00878363		0.101049	16.8938	2.66105	39.8149	920.804	116.742	6959.3	1.06042e+15		5.77921	0.0507625	0.157362	0.0014186		3.75432	0.0472539	0.173034	0.00151987	0.697859			1028.81	9.03665	2427.51	7.64299		29714.5	4626.67	222039
OtterLake	Jl14C175	ok	919.099	10.9333	0.171252	0.0115936		0.0931525	16.5142	2.6097	39.3323	830.375	104.81	6961.5	943717809659151		5.83936	0.0676993	0.158096	0.00296047		3.733	0.0822163	0.171252	0.00198543	0.526404			1019	11.8139	2435.4	15.8632		17585.4	2784.89	113864
OtterLake	Fe06C029	ok	910.383	12.1609	0.171021	0.0129462		0.12292	17.0026	2.86329	40.3311	901.295	113.352	6977.88	1.0128e+15		5.84723	0.0756994	0.164468	0.00346028		3.87821	0.0958046	0.171021	0.00221407	0.524067			1017.73	13.1758	2502.12	17.7039		13054.3	2149.81	95587.3
OtterLake	SE24A127	ok	909.149	8.42697	0.176941	0.00867707		0.147445	18.6877	3.57791	44.3668	889.875	105.807	6978.41	9.7883e+14		5.6516	0.0490393	0.190821	0.00259572		4.6554	0.0751136	0.176941	0.00153533	0.537788			1050.24	9.11303	2749.25	11.1786		37997.2	7162.72	198285
OtterLake	NO12B506	ok	915.206	6.69977	0.169497	0.00736264		0.109174	16.9949	2.61623	40.1872	886.644	110.387	6981	998229629666207		5.8998	0.0434382	0.153564	0.000937861		3.58884	0.0343306	0.169497	0.00124795	0.769672			1009.34	7.43141	2386	5.19995		33067.3	5128.36	273725
OtterLake	Ap24a004	ok	927.103	7.75155	0.17255	0.0083971		0.114689	17.0823	2.67397	40.6153	919.434	116.794	6992.23	1.05695e+15		5.79543	0.0486648	0.15708	0.00122512		3.73713	0.0428289	0.17255	0.00144892	0.732707			1026.14	8.61663	2424.47	6.61442		30864.8	4790.74	231571
OtterLake	MY20B162	ok	908.506	9.4625	0.169327	0.0100902		0.107009	16.8106	2.68599	40.7	907.426	112.348	6995.83	1011757144013515		5.90573	0.0595902	0.158533	0.00266067		3.70125	0.0724806	0.169327	0.00170855	0.515263			1008.4	10.175	2440.08	14.2107		33281.4	5317.03	235742
OtterLake	Ma01D020	ok	899.651	8.69258	0.165177	0.00965557		0.100175	16.2862	2.40098	38.4375	878.561	109.755	6996.93	9.72686e+14		6.0541	0.0584558	0.147261	0.00176092		3.35382	0.0515464	0.165177	0.00159488	0.628231			985.485	9.51542	2314.36	10.2577		14460.1	2132.34	118315
OtterLake	NO12B589	ok	912.766	6.43503	0.168624	0.0070852		0.0933766	17.0001	2.57722	40.2709	896.99	111.003	7001.98	1.00487e+15		5.93035	0.0420177	0.151709	0.000911979		3.52722	0.032774	0.168624	0.00119474	0.762526			1004.53	7.11727	2365.28	5.12927		33081.3	5057	275878
OtterLake	NO12B512	ok	913.565	6.60819	0.169378	0.00725747		0.120268	17.2984	2.67658	40.9446	909.273	112.648	7003.06	1.01997e+15		5.90394	0.0428477	0.154433	0.000975874		3.60661	0.0347063	0.169378	0.00122926	0.754182			1008.69	7.3205	2395.6	5.37494		33271.8	5186.84	276171
OtterLake	NO12B564	ok	911.374	7.63901	0.168968	0.00844754		0.101872	17.5356	2.70826	41.5633	910.74	111.588	7005	1015028755450199		5.91829	0.049995	0.154459	0.0011218		3.59847	0.0400885	0.168968	0.00142736	0.758278			1006.42	8.50178	2395.89	6.17748		30890	4809.29	250890
OtterLake	NO12B458	ok	915.938	6.48431	0.170091	0.00706931		0.102463	17.3716	2.70205	41.0922	908.509	112.66	7012.56	1.02224e+15		5.87922	0.041562	0.155605	0.00105522		3.64927	0.0357483	0.170091	0.00120242	0.72165			1012.61	7.15845	2408.46	5.76056		32936.1	5158.52	271879
OtterLake	NO12B535	ok	913.657	6.63216	0.168972	0.00727384		0.102059	17.0073	2.59092	40.5894	892.125	110.931	7030.66	1.00217e+15		5.91814	0.0430476	0.15252	0.00104742		3.55338	0.0355463	0.168972	0.00122907	0.727128			1006.44	7.32071	2374.37	5.85419		32936.9	5056.62	273997
OtterLake	SE24A079	ok	930.677	6.74389	0.172912	0.00721328		0.11332	17.6367	2.74442	42.0935	905.977	107.807	7035.18	1.0216e+15		5.78327	0.0417164	0.155674	0.00120009		3.71145	0.0391834	0.172912	0.00124727	0.68324			1028.14	7.41624	2409.21	6.54804		36103.3	5588	215422
OtterLake	JA17A098	ok	904.863	8.80033	0.168039	0.00970076		0.150777	18.2018	2.83098	43.2611	947.196	119.071	7038.95	1.05743e+15		5.951	0.0577292	0.155859	0.00176011		3.61113	0.0537605	0.168039	0.00163011	0.651607			1001.3	9.71335	2411.22	9.59029		15795	2527.26	129789
OtterLake	SE18C019	ok	919.927	9.53475	0.171967	0.0103174		0.0975834	16.7185	2.67785	39.5111	890.328	110.805	7042.21	1007672814591297		5.81507	0.0599966	0.160561	0.00195097		3.80704	0.0606856	0.171967	0.00177426	0.647253			1022.94	10.5541	2461.58	10.2662		13021.2	2066.72	90049.9
OtterLake	NO12B618	ok	922.718	6.94324	0.170186	0.00759458		0.109611	16.6351	2.50034	39.1209	865.165	107.586	7043.05	982028153312455		5.87592	0.0446251	0.150252	0.000930336		3.52571	0.0345477	0.170186	0.00129249	0.775052			1013.14	7.69434	2348.8	5.29232		32061.9	4860.81	265032
OtterLake	Ap24a035	ok	926.33	8.67476	0.17463	0.00930256		0.10405	16.7428	2.78724	39.9228	900.317	113.452	7045.43	1.03105e+15		5.7264	0.0532702	0.166813	0.00170225		4.01651	0.0554615	0.17463	0.00162451	0.673691			1037.57	9.65206	2525.92	8.56657		27509.4	4531.85	202615
OtterLake	OC02B003	ok	912.592	8.92148	0.168613	0.00974009		0.0908849	17.0805	2.58792	40.4181	911.119	114.121	7047.94	1024933873894208		5.93075	0.0577661	0.151807	0.00185221		3.52926	0.055099	0.168613	0.0016423	0.623882			1004.46	9.78355	2366.38	10.4095		13410.7	2011.22	94321.9
OtterLake	JA23C003	ok	910.404	9.8918	0.167497	0.0108369		0.0897703	17.5108	2.60798	42.1322	948.089	118.326	7048.96	1.06246e+15		5.97025	0.064699	0.148609	0.00210268		3.43205	0.0611671	0.167497	0.00181515	0.608052			998.307	10.8186	2329.98	12.1175		15874	2365.91	125477
OtterLake	Fe06C030	ok	915.684	9.37633	0.168872	0.0102117		0.101483	17.122	2.58568	40.6062	924.605	116.12	7064.09	1.04481e+15		5.92166	0.0604702	0.150325	0.0019515		3.50018	0.057812	0.168872	0.00172447	0.618259			1005.89	10.2719	2349.63	11.095		12943.9	1911.11	96354.8
OtterLake	NO12B480	ok	912.007	7.00796	0.169184	0.00773478		0.0939284	17.4249	2.69735	41.6256	917.76	113.617	7076.69	1.02739e+15		5.91072	0.0457181	0.154892	0.000983696		3.61318	0.0361607	0.169184	0.0013086	0.772859			1007.61	7.79367	2400.65	5.39917		33896.1	5284.67	281479
OtterLake	NO12B479	ok	912.341	6.40773	0.169212	0.00702865		0.091712	17.3332	2.68596	41.1249	914.154	112.886	7077.91	1.02282e+15		5.90975	0.0415376	0.154732	0.000986348		3.61004	0.0342549	0.169212	0.00118933	0.740733			1007.77	7.08325	2398.89	5.42031		34046.2	5313.55	282383
OtterLake	Fe06C021	ok	906.488	14.6994	0.194037	0.0147841		0.257356	20.029	5.45201	47.5044	925.875	114.627	7082.23	1.0299e+15		5.15366	0.0761924	0.258191	0.0048027		6.90759	0.164131	0.194037	0.00286867	0.622204			1143.21	16.9013	3235.7	14.665		14786.3	3943.29	93427
OtterLake	MY14A151	ok	907.86	7.90973	0.165225	0.00879766		0.077681	17.7675	2.48968	42.5607	965.892	118.207	7084.76	1.07169e+15		6.05237	0.0532466	0.140298	0.00128272		3.19615	0.0405534	0.165225	0.00145359	0.693373			985.746	8.67226	2230.89	7.91321		18780.9	2607.22	142878
OtterLake	Ma01D011	ok	914.443	8.55021	0.16927	0.00920587		0.0997446	18.0614	2.75922	43.2237	979.381	120.789	7092.37	1.09796e+15		5.90771	0.0543856	0.153194	0.00204535		3.5754	0.057984	0.16927	0.00155828	0.567652			1008.09	9.28034	2381.89	11.3726		14383.5	2197.15	116576
OtterLake	NO12B452	ok	920.779	6.63802	0.170726	0.00722792		0.102046	17.7259	2.73199	42.0621	923.9	114.622	7110.09	1.04551e+15		5.85734	0.0423364	0.154327	0.00100186		3.63282	0.0352937	0.170726	0.00123399	0.743978			1016.11	7.34437	2394.44	5.5225		33200	5152.03	273214
OtterLake	AU28A015	ok	885.798	11.5524	0.168882	0.0125646		0.138682	17.9891	3.14076	43.6476	921.098	113.118	7110.91	997201851993728		5.9213	0.074399	0.176004	0.00339233		4.09833	0.094294	0.168882	0.00212194	0.546101			1005.95	12.6394	2615.57	16.0396		16129.8	2820.82	107635
OtterLake	SE24A005	ok	904.91	10.1547	0.180568	0.0107386		0.192057	18.9336	3.9733	45.3033	960.558	121.331	7114.24	1.07427e+15		5.53809	0.0594711	0.209018	0.0026694		5.20385	0.0868309	0.180568	0.00193904	0.643571			1070.08	11.4911	2897.94	10.3556		35548.2	7535.55	241416
OtterLake	MY20B273	ok	901.424	8.04039	0.172576	0.00888474		0.0959403	10.9248	1.96013	18.6788	383.689	71.4707	7118.68	500920208291542		5.79455	0.0514831	0.17881	0.0013153		4.25474	0.0490767	0.172576	0.00153329	0.770268			1026.29	9.1183	2641.86	6.10602		23284.1	4165.79	154103
OtterLake	Jl14C100	ok	901.069	8.69479	0.166399	0.00973824		0.124115	17.8229	2.70718	42.6367	964.143	122.096	7123.45	1.07447e+15		6.00965	0.0585235	0.151665	0.00137811		3.47966	0.046346	0.166399	0.00162043	0.731147			992.24	9.66267	2364.78	7.75363		18773.1	2858.8	132780
OtterLake	NO12B453	ok	907.663	6.76101	0.168777	0.00747096		0.0856653	17.6795	2.77535	42.0207	933.371	115.613	7142.71	1.03984e+15		5.92498	0.0442653	0.156784	0.00100493		3.64852	0.035915	0.168777	0.00126093	0.758957			1005.37	7.51108	2421.27	5.43766		33066.3	5226.47	275194
OtterLake	SE18C020	ok	919.434	9.54254	0.171219	0.0103936		0.111257	17.3953	2.75007	41.5913	922.995	115.029	7154.87	1.04458e+15		5.84046	0.0607033	0.157669	0.00178684		3.72221	0.0572374	0.171219	0.00177958	0.675906			1018.83	10.5893	2430.82	9.60494		13420.5	2102.18	92626.1
OtterLake	SE24A054	ok	898.135	9.22728	0.165949	0.0104275		0.106074	18.476	2.81131	43.75	1015.24	122.358	7168.61	1.10778e+15		6.02593	0.0628352	0.152152	0.00124652		3.48141	0.0461665	0.165949	0.00173043	0.786334			989.754	10.3206	2370.26	6.9868		37316.2	5677.47	248226
OtterLake	JA23A006	ok	916.079	9.30312	0.168002	0.0101895		0.112544	17.3885	2.53072	40.9467	940.547	119.403	7198.23	1.06748e+15		5.95231	0.060651	0.146021	0.00177235		3.38246	0.0536039	0.168002	0.00171186	0.642967			1001.09	10.2006	2299.85	10.4279		13647.1	2025.15	116531
OtterLake	AU28A002	ok	913.416	9.37427	0.169395	0.0102261		0.0915147	17.2457	2.65434	41.0901	925.224	115.735	7200.23	1.04129e+15		5.90335	0.0603681	0.154636	0.00194298		3.61172	0.0585107	0.169395	0.00173225	0.631229			1008.78	10.3158	2397.84	10.6851		16204.9	2504.85	115446
OtterLake	AP19E015	ok	921.996	15.6246	0.170492	0.0166867		0.15295	19.0181	2.89706	44.1511	942.423	118.257	7209.96	1.07233e+15		5.86539	0.0978739	0.152241	0.00401521		3.57879	0.111692	0.170492	0.00284494	0.534666			1014.82	16.9339	2371.25	22.49		11532.5	1744.08	72118.3
OtterLake	AP24C006	ok	920.053	9.46061	0.168969	0.0103107		0.0787695	17.551	2.56551	41.5286	921.342	115.554	7211.48	1.04583e+15		5.91824	0.0610215	0.147019	0.00181805		3.42517	0.0551476	0.168969	0.0017422	0.640391			1006.43	10.377	2311.54	10.6111		15249.3	2202.34	103482
OtterLake	SE24A029	ok	902.489	6.90152	0.16782	0.00759304		0.0876775	17.8342	2.80214	42.3194	960.092	118.833	7213.04	1062926375574648		5.95877	0.0452452	0.156913	0.00132956		3.63082	0.0413099	0.16782	0.00127426	0.667369			1000.09	7.59371	2422.67	7.18726		34849.3	5503.64	239800
OtterLake	MY14A077	ok	894.692	8.56199	0.164516	0.00968304		0.089332	17.3535	2.58321	41.3291	933.141	115.445	7219.87	1.02356e+15		6.07842	0.0588576	0.148533	0.00128018		3.36925	0.0436763	0.164516	0.00159302	0.746963			981.826	9.50706	2329.11	7.38193		17060.6	2530.31	130903
OtterLake	Jl14C101	ok	916.529	8.38965	0.168618	0.00921007		0.107467	18.0481	2.68256	42.981	964.941	122.212	7232	1.09479e+15		5.93056	0.0546208	0.148448	0.00143367		3.45129	0.0460584	0.168618	0.00155299	0.690137			1004.49	9.25145	2328.13	8.27257		18875.9	2812.76	131940
OtterLake	MY20B164	ok	919.989	7.65749	0.169325	0.00826689		0.0948516	17.1064	2.55447	40.9212	917.276	114.194	7237	1.03836e+15		5.9058	0.0488226	0.148691	0.00160895		3.47142	0.0472712	0.169325	0.00139979	0.607089			1008.39	8.33625	2330.93	9.26609		33970.1	5071.81	240146
OtterLake	JA23A003	ok	913.776	9.24879	0.167171	0.0101599		0.0895015	17.7966	2.56177	43.4122	995.252	123.863	7244.08	1.11852e+15		5.98191	0.0607753	0.144191	0.0017632		3.32352	0.0528379	0.167171	0.00169843	0.639057			996.504	10.1243	2278.14	10.53		14380.4	2111.45	124295
OtterLake	SE18C010	ok	882.866	9.34106	0.162763	0.0105576		0.133156	16.8373	2.53267	40.7392	956.856	119.633	7250.18	1.03896e+15		6.1439	0.064865	0.150774	0.00197035		3.38363	0.0568453	0.162763	0.00171839	0.628427			972.114	10.2632	2354.72	11.1629		12982.8	1937.6	96010.9
OtterLake	JA23C005	ok	914.156	9.6278	0.167029	0.0104982		0.109312	17.2334	2.46396	40.5353	924.097	115.815	7251.51	1.04163e+15		5.987	0.0628528	0.143204	0.00209065		3.29798	0.0593037	0.167029	0.0017535	0.583824			995.718	10.4533	2266.32	12.5875		15717.5	2237.89	122728
OtterLake	SE17A060	ok	924.57	7.79369	0.170169	0.00853026		0.0980744	16.6333	2.47275	39.2145	889.627	109.288	7257.75	1.00752e+15		5.8765	0.0501281	0.148597	0.00107159		3.48652	0.0389445	0.170169	0.00145159	0.763674			1013.04	8.64152	2329.84	6.17603		33740.9	4965.3	251180
OtterLake	JL17C181	ok	899.198	9.10803	0.165112	0.0100979		0.104885	14.882	2.17776	33.9172	766.907	99.4429	7276.99	860214506795892		6.05648	0.0611579	0.147356	0.00194213		3.35465	0.0556992	0.165112	0.00166729	0.608178			985.125	9.94773	2315.46	11.3047		11397.7	1658.18	80780.1
OtterLake	AU28A003	ok	906.718	8.96038	0.166764	0.00992221		0.0977072	17.5399	2.59952	41.7976	952.933	119.213	7286.74	1.06426e+15		5.9965	0.0594985	0.148435	0.00165592		3.41303	0.0509564	0.166764	0.00165467	0.664584			994.256	9.86522	2327.98	9.55603		16443.2	2446.88	118636
OtterLake	DE05B003	ok	911.242	7.43144	0.168828	0.00815187		0.0872239	15.4324	2.37462	36.5867	851.817	107.675	7291.34	9.59912e+14		5.92317	0.0482849	0.153943	0.00133402		3.5835	0.0426341	0.168828	0.00137627	0.685184			1005.65	8.19795	2390.2	7.37503		26694.8	4073.48	196632
OtterLake	AU20B049	ok	984.066	8.86191	0.182673	0.00896856		0.116363	16.9468	2.61606	40.2309	877.925	109.919	7296.73	1.06898e+15		5.47427	0.0490964	0.153913	0.00172918		3.87658	0.0557279	0.182673	0.00163831	0.623877			1081.56	9.70003	2389.86	9.56188		17209.7	2655.85	113790
OtterLake	AU20B001	ok	906.363	8.58928	0.168491	0.00948234		0.104417	17.6941	2.76939	42.1601	921.53	116.173	7319.79	1.03162e+15		5.93502	0.0562779	0.156612	0.00159624		3.63835	0.0506499	0.168491	0.00159769	0.681147			1003.79	9.51831	2419.41	8.64836		16676.1	2614	113916
OtterLake	MY14A120	ok	912.205	7.91438	0.166032	0.00873766		0.0850214	18.1485	2.5452	43.1427	976.446	119.956	7339.84	1.09033e+15		6.02294	0.0526264	0.140274	0.00137091		3.21122	0.0420977	0.166032	0.00145073	0.666511			990.21	8.65212	2230.59	8.45898		18825.6	2621.76	142795
OtterLake	NO05A003	ok	907.82	5.91368	0.169274	0.00649615		0.120721	17.7391	2.82212	42.7317	930.337	115.637	7351.59	1.03794e+15		5.90757	0.0383765	0.158884	0.000855621		3.70828	0.0312905	0.169274	0.00109963	0.769866			1008.11	6.54884	2443.82	4.5581		47892.5	7730.88	362394
OtterLake	AU20B003	ok	918.414	8.51375	0.169669	0.0092602		0.109071	17.7711	2.68482	42.1381	912.046	115.86	7352.09	1.03815e+15		5.89383	0.0545781	0.151595	0.00166129		3.54641	0.0508815	0.169669	0.00157117	0.645432			1010.29	9.35546	2364	9.35191		16591.5	2510.15	112423
OtterLake	NO05A084	ok	924.286	5.954	0.170927	0.00645883		0.0868751	16.7476	2.55073	39.6367	877.741	109.842	7354.46	1.00036e+15		5.85044	0.037787	0.152247	0.000811696		3.58807	0.0300501	0.170927	0.00110399	0.771203			1017.22	6.57004	2371.32	4.54627		49035.1	7498.75	371676
OtterLake	MY14A051	ok	888.86	8.03682	0.163448	0.0090722		0.114462	16.9442	2.52168	40.2065	918.242	113.493	7360.46	9.99996e+14		6.11817	0.0555052	0.148679	0.00146405		3.35065	0.0448623	0.163448	0.00148283	0.677579			975.907	8.85362	2330.79	8.43242		16051.4	2384.93	124386
OtterLake	MY20B274	ok	899.984	7.79772	0.171713	0.00863072		0.0894193	10.9819	1.93814	18.753	389.599	72.1538	7370.37	5.06445e+14		5.82365	0.0502623	0.1763	0.00127379		4.17405	0.0469821	0.171713	0.00148201	0.766783			1021.55	8.81667	2618.37	6.01101		23629.7	4158.35	156997
OtterLake	NO05A004	ok	910.33	6.08559	0.169413	0.00667235		0.108541	17.6415	2.77951	42.3102	924.82	114.961	7371.69	1.03481e+15		5.90273	0.0393851	0.157358	0.000915881		3.67567	0.0325451	0.169413	0.00113038	0.753579			1008.88	6.73157	2427.46	4.93463		47262.7	7554.59	357488
OtterLake	NO05A030	ok	921.114	6.17652	0.171892	0.00667607		0.117221	18.1341	2.88533	42.95	931.739	116.827	7377.21	1.05882e+15		5.81761	0.0388388	0.159227	0.000974024		3.77376	0.0341708	0.171892	0.00114756	0.737294			1022.53	6.82646	2447.47	5.17575		48491.8	7800.1	362076
OtterLake	JA17A099	ok	917.386	27.0984	0.187595	0.0269536		0.225214	19.9139	4.65877	47.2272	987.602	123.081	7404.81	1115081707071255		5.33062	0.143679	0.226345	0.00985826		5.85457	0.299869	0.187595	0.00505637	0.526236			1108.34	29.8736	3026.39	34.928		19229.1	4627.77	149338
OtterLake	Ap19D431	ok	910.577	9.17336	0.167836	0.0100751		0.0974153	16.1256	2.41737	38.1212	863.689	108.332	7405.85	9.69819e+14		5.95818	0.0600291	0.15001	0.00182101		3.47142	0.0547636	0.167836	0.00169096	0.638649			1000.18	10.0769	2346.04	10.3788		14870.8	2201.65	101238
OtterLake	JL17C048	ok	890.921	8.28098	0.163489	0.00927863		0.0699774	16.3973	2.39909	39.2015	897.423	110.289	7411.48	9.77709e+14		6.11661	0.0567537	0.147055	0.00169805		3.31489	0.0491038	0.163489	0.00151696	0.62638			976.139	9.05723	2311.95	9.90784		12469.8	1806.41	89170.1
OtterLake	MA19a036	ok	925.036	9.15089	0.171591	0.00992		0.144715	16.9922	2.63041	40.0316	881.592	112.304	7420.62	1.01212e+15		5.82782	0.057812	0.154575	0.00166554		3.65707	0.0535617	0.171591	0.00170218	0.677315			1020.87	10.127	2397.16	9.16366		16691.4	2551.12	109689
OtterLake	NO05A085	ok	906.201	6.09174	0.167362	0.00673039		0.100483	16.6914	2.53021	39.9106	894.954	111.646	7424.66	9.97903e+14		5.97507	0.0402146	0.151625	0.000923162		3.49887	0.0317546	0.167362	0.00112641	0.741587			997.56	6.71397	2364.33	5.19557		49196.2	7487.09	380282
OtterLake	AU20B002	ok	908.648	8.03173	0.168345	0.0087712		0.108612	18.4686	2.83417	43.7944	960.791	121.227	7431.16	1.07876e+15		5.94018	0.0521025	0.153986	0.0017037		3.57423	0.0504646	0.168345	0.00147659	0.621233			1002.99	8.79739	2390.67	9.41573		16781.4	2579.02	114544
OtterLake	DE05B007	ok	907.931	7.42726	0.168033	0.0082169		0.0967913	16.018	2.45826	38.1565	882.26	111.799	7449.75	9.91314e+14		5.95121	0.0489005	0.153188	0.00119817		3.54911	0.0402624	0.168033	0.00138071	0.724315			1001.26	8.22728	2381.82	6.66243		27086.9	4123	200035
OtterLake	NO05A029	ok	918.877	6.01942	0.171463	0.00655019		0.103907	18.3941	2.93342	43.6761	950.112	118.722	7451.08	1.0756e+15		5.83218	0.0382018	0.15922	0.000800968		3.76415	0.0310883	0.171463	0.00112311	0.793093			1020.16	6.68227	2447.39	4.2564		48484.8	7817.9	362715
OtterLake	DE05B002	ok	915.262	7.34584	0.16914	0.00800685		0.097622	15.9611	2.41768	38.4453	880.184	110.989	7458.38	9.95591e+14		5.91226	0.0473386	0.151903	0.00138165		3.54254	0.0429275	0.16914	0.00135428	0.660756			1007.37	8.06586	2367.46	7.75912		27054.9	4063.91	198499
OtterLake	DE05B066	ok	913.809	7.92759	0.168107	0.00866562		0.0955867	15.7314	2.35136	37.5509	864.954	109.236	7459.33	9.77276e+14		5.9486	0.0515483	0.148458	0.00154337		3.44104	0.0465711	0.168107	0.00145675	0.640284			1001.67	8.68011	2328.24	8.9049		26055.6	3868.53	196450
OtterLake	JL17C049	ok	906.985	9.07665	0.167418	0.00996649		0.0793537	16.3003	2.46029	39.3038	885.7	107.483	7459.4	9.78797e+14		5.97309	0.0595308	0.1512	0.00191987		3.49024	0.0563388	0.167418	0.00166857	0.617433			997.867	9.94523	2359.55	10.8408		12216.5	1825.72	85640.7
OtterLake	JL17C006	ok	888.322	9.60842	0.166625	0.0106705		0.128485	15.7565	2.57981	37.7547	869.8	106.503	7466.76	9.43486e+14		6.00151	0.0640389	0.163763	0.00226151		3.76233	0.0656595	0.166625	0.00177796	0.611425			993.487	10.601	2494.89	11.6288		11452.1	1853.63	82370.2
OtterLake	SE17A058	ok	897.417	8.53606	0.165365	0.009661		0.0892445	16.2415	2.44635	38.741	896.861	109.815	7471.19	9.83278e+14		6.04724	0.0584224	0.150083	0.00108138		3.42196	0.0412413	0.165365	0.00159759	0.801612			986.521	9.53078	2346.87	6.15973		33233.3	4955.59	255503
OtterLake	DE05B067	ok	903.807	7.73172	0.16872	0.00852018		0.0966574	15.7843	2.52997	37.6903	861.633	108.936	7474.96	9.62725e+14		5.92697	0.0504989	0.159839	0.00146444		3.71835	0.0465218	0.16872	0.00143753	0.680994			1005.06	8.56327	2453.95	7.74685		25631.9	4081.05	192146
OtterLake	NO05A056	ok	911.655	5.95555	0.168211	0.00653223		0.106181	17.4812	2.64084	41.4848	925.344	115.7	7480.06	1.03916e+15		5.94493	0.0388336	0.150787	0.000921388		3.49718	0.0312814	0.168211	0.00109879	0.730285			1002.24	6.54689	2354.87	5.21955		48995.7	7457.63	375313
OtterLake	MY20B228	ok	904.113	8.10867	0.173471	0.00895778		0.0853396	11.0376	1.99475	19.1884	394.904	71.8524	7495.85	5.11711e+14		5.76464	0.0516384	0.180394	0.00121875		4.3147	0.0484104	0.173471	0.00155392	0.798384			1031.21	9.23735	2656.49	5.60033		22966.4	4143.33	154159
OtterLake	Fe06C031	ok	907.628	9.60386	0.165267	0.0106475		0.0965348	18.2258	2.5573	43.8868	1022.17	126.694	7501.72	1.13899e+15		6.05082	0.0644262	0.140698	0.00179492		3.20608	0.0532747	0.165267	0.00175968	0.640769			985.98	10.4982	2235.81	11.0356		13631.4	1869.54	103942
OtterLake	NO05A055	ok	897.708	6.08489	0.166387	0.00677559		0.0997824	17.1865	2.65832	40.8319	918.615	114.82	7528.58	1.01492e+15		6.01007	0.0407218	0.154533	0.000929792		3.54523	0.0321249	0.166387	0.00112737	0.747737			992.175	6.72257	2396.71	5.11723		48718.7	7593.5	376721
OtterLake	SE17A043	ok	920.649	10.4753	0.169297	0.0115245		0.0947697	16.426	2.44718	38.8655	908.567	112.012	7534.57	1.02569e+15		5.9068	0.068073	0.147997	0.00163544		3.45463	0.0551583	0.169297	0.00195106	0.721794			1008.23	11.6194	2322.91	9.47087		35423.2	5228.34	282054
OtterLake	MY14A210	ok	893.029	8.30433	0.162945	0.00936228		0.091207	18.2419	2.60056	43.594	1000.6	123.074	7538.79	1093151571136850		6.13702	0.0574565	0.142631	0.00147086		3.20447	0.0446327	0.162945	0.00152554	0.672178			973.125	9.11066	2259.39	8.89805		18589.4	2614.05	142468
OtterLake	AP19E051	ok	918.408	9.28709	0.169615	0.0101099		0.0835743	16.3302	2.4689	38.7239	877.066	109.638	7538.94	9.92519e+14		5.89571	0.0596051	0.151356	0.00183686		3.53968	0.0559105	0.169615	0.00171479	0.640055			1009.99	10.2109	2361.3	10.3595		14369.4	2152.41	96765
OtterLake	MY29A027	ok	887.545	6.61478	0.161567	0.00751027		0.0699112	16.3785	2.31513	38.8199	896.045	112.824	7549.27	9.8083e+14		6.18938	0.0464839	0.140956	0.00103931		3.14007	0.0330483	0.161567	0.00121341	0.713584			965.48	7.25101	2238.99	6.37607		34211.4	4823.01	275922
OtterLake	AP01B420	ok	914.865	9.44936	0.170808	0.0103274		0.106484	15.3376	2.44887	36.4161	870.066	108.801	7565.95	9.80734e+14		5.85452	0.0604617	0.159721	0.00180232		3.76159	0.0575398	0.170808	0.001764	0.675138			1016.56	10.4984	2452.71	9.5425		30057.8	4758.89	264176
OtterLake	DE05B051	ok	923.572	7.56827	0.170751	0.00818097		0.100415	16.7808	2.54354	39.8228	902.416	114.268	7568.3	1.03204e+15		5.85649	0.0479118	0.152064	0.0014131		3.58006	0.044324	0.170751	0.00139691	0.660779			1016.25	8.31388	2369.27	7.9259		27556.9	4147.69	202626
OtterLake	Jl14C138	ok	911.026	8.26557	0.165669	0.00911262		0.0809114	18.6545	2.61153	44.8905	1033.15	128.522	7574.69	1.15726e+15		6.03612	0.0550049	0.13961	0.00154917		3.18905	0.0457902	0.165669	0.00150968	0.634646			988.206	9.00514	2222.38	9.61284		19755.2	2772.02	139582
OtterLake	MA19a084	ok	905.438	8.13389	0.168829	0.00890702		0.0901582	16.977	2.68231	40.6114	896.942	112.218	7577.89	1000274621998691		5.92316	0.0527577	0.158926	0.0017104		3.69951	0.0516821	0.168829	0.00150376	0.637582			1005.65	8.95739	2444.27	9.10887		16296.4	2549.95	106748
OtterLake	MY20B272	ok	893.952	6.8025	0.164172	0.00769137		0.0935673	16.0295	2.36637	38.3642	880.425	110.255	7596.93	969120892336426		6.09119	0.0468496	0.147577	0.000894108		3.34054	0.0327072	0.164172	0.0012627	0.785554			979.918	7.53691	2318.03	5.19519		34502.8	5079.17	240191
OtterLake	SE17A042	ok	912.348	8.05174	0.166926	0.00898067		0.0951279	16.6688	2.40912	39.7606	917.658	112.81	7620.77	1.0251e+15		5.99069	0.0538004	0.144297	0.000946649		3.3211	0.0369362	0.166926	0.00149911	0.807493			995.15	8.93712	2279.41	5.64857		32395.6	4638.78	256450
OtterLake	AP19E057	ok	915.861	8.32765	0.16882	0.00906597		0.103907	16.1682	2.42553	38.5281	881.504	109.67	7626.5	9.92938e+14		5.92348	0.0537021	0.149938	0.00168508		3.4901	0.0503948	0.16882	0.00153051	0.627865			1005.6	9.11678	2345.22	9.60943		14509.6	2155.98	98678.5
OtterLake	AP01B419	ok	906.653	9.23681	0.174154	0.00950185		0.133791	16.6264	2.99742	39.7075	909.628	113.727	7645.88	1.0156e+15		5.74206	0.0545602	0.181179	0.00307812		4.35053	0.0846872	0.174154	0.00165478	0.488127			1034.96	9.83399	2663.69	14.0735		31386.4	5611.07	265926
OtterLake	MA19a046	ok	915.099	17.7982	0.187292	0.0181312		0.214636	18.5359	4.25733	43.9211	871.183	108.731	7651.48	981574773747611		5.33924	0.0968068	0.226991	0.0057864		5.86178	0.183369	0.187292	0.00339583	0.579602			1106.69	20.0656	3030.95	20.4352		16482.8	3740.05	96075.1
OtterLake	SE17A041	ok	905.257	7.84439	0.165703	0.00878116		0.102045	16.4751	2.39338	39.4614	915.648	112.416	7652.84	1014042857158165		6.03488	0.0529932	0.144805	0.00108547		3.30839	0.0381972	0.165703	0.00145507	0.760567			988.395	8.67925	2285.46	6.45001		32459.5	4672.08	259524
OtterLake	AP19E025	ok	920.454	9.44161	0.170069	0.0102639		0.0906606	16.7508	2.53378	39.3891	884.971	110.289	7659.47	1.00271e+15		5.87998	0.0603514	0.151653	0.00184299		3.55613	0.0565675	0.170069	0.00174556	0.645241			1012.49	10.3921	2364.65	10.3701		14627.9	2195.37	96783.3
OtterLake	MY29A034	ok	888.692	6.22907	0.161061	0.00706383		0.0741144	18.9357	2.60149	44.689	1018.91	130.509	7660.26	1123801274361402		6.20884	0.0438582	0.137506	0.000973727		3.0536	0.0305426	0.161061	0.00113771	0.706231			962.669	6.80013	2196.03	6.15225		39474.5	5409.62	318229
OtterLake	Ap19D389	ok	940.226	12.3802	0.175377	0.0132066		0.110788	18.2454	2.90069	43.2121	923.779	115.026	7665.1	1069986992279427		5.702	0.0753039	0.158489	0.0023666		3.83241	0.0763975	0.175377	0.00231613	0.662496			1041.67	13.7569	2439.6	12.6443		14559.4	2285.78	93256.8
OtterLake	JA30A002	ok	895.989	9.58252	0.165668	0.0106634		0.0921277	16.2618	2.47542	38.5626	917.359	114.552	7673.19	1.01115e+15		6.03617	0.0643659	0.152729	0.00202196		3.48867	0.0593049	0.165668	0.00176658	0.627283			988.198	10.5375	2376.7	11.2829		12167.6	1886.94	110790
OtterLake	Ap19D420	ok	914.751	8.73069	0.168427	0.00956616		0.0912851	16.6476	2.48057	39.7145	896.121	112.026	7681.27	1.00986e+15		5.9373	0.0567971	0.149106	0.00164143		3.46264	0.0504997	0.168427	0.0016112	0.655928			1003.44	9.59905	2335.7	9.42215		15125.1	2225.73	103215
OtterLake	JA30A021	ok	910.732	10.2385	0.168506	0.0112286		0.0980724	16.3327	2.4965	39.124	916.041	114.515	7687.07	1.02755e+15		5.9345	0.0666361	0.152923	0.00210724		3.55297	0.0631552	0.168506	0.00189209	0.631696			1003.88	11.2721	2378.88	11.7412		11951.7	1857.06	107878
OtterLake	AP01B393	ok	930.681	6.90832	0.172154	0.0074676		0.0894461	16.5537	2.51747	39.3719	916.706	114.673	7699.57	1052210680057512		5.80874	0.0433773	0.152311	0.000995324		3.61535	0.0358756	0.172154	0.00128558	0.752543			1023.97	7.6466	2372.03	5.572		29186.4	4405.35	248850
OtterLake	AP24C007	ok	889.571	10.8149	0.171771	0.0118057		0.117018	12.8261	2.38177	25.1229	520.277	83.314	7699.59	6.26966e+14		5.82172	0.0687292	0.185339	0.00284955		4.38952	0.0850885	0.171771	0.00202787	0.609027			1021.86	12.0637	2701.24	12.6911		10854.4	1990.97	72612.8
OtterLake	AP01B418	ok	906.369	7.06276	0.167939	0.00782058		0.0977638	16.16	2.50253	38.5753	898.572	112.352	7707.3	1.00295e+15		5.95453	0.0465678	0.154109	0.00111241		3.56847	0.0379779	0.167939	0.00131338	0.734835			1000.75	7.82643	2392.03	6.1421		28382.9	4358.75	244367
OtterLake	MA19a017	ok	899.648	12.8694	0.18932	0.0133597		0.231156	19.189	4.78968	44.9803	917.985	116.406	7708.47	1.02183e+15		5.28205	0.0705667	0.246534	0.00377		6.43541	0.130676	0.18932	0.00252927	0.657925			1117.69	14.932	3162.65	12.1263		20801	5120.79	125614
OtterLake	MA19a068	ok	919.644	8.21401	0.169786	0.00888424		0.107876	17.7165	2.68138	42.4417	936.274	117.637	7718.62	1.06297e+15		5.88978	0.0523262	0.15107	0.00170399		3.53655	0.0507782	0.169786	0.00150842	0.61876			1010.93	8.98134	2358.07	9.63155		16750.2	2507.98	110348
OtterLake	MA19a004	ok	914.138	8.28253	0.168634	0.00904742		0.0730085	17.6263	2.64112	41.6581	923.747	115.971	7727.87	1.04186e+15		5.93001	0.0536513	0.150573	0.00162653		3.50101	0.0493312	0.168634	0.0015257	0.642091			1004.58	9.08885	2352.45	9.22944		17841.8	2634.9	116947
OtterLake	Ap19D417	ok	914.011	11.0193	0.173755	0.0120015		0.090811	12.2633	2.11758	24.1437	509.533	80.3231	7762.1	6.27682e+14		5.75522	0.0690713	0.173327	0.00223144		4.15247	0.0730859	0.173755	0.00208533	0.681882			1032.77	12.3948	2590.03	10.7401		10911.6	1860.79	72490.5
OtterLake	AP19E034	ok	907.795	8.71884	0.168465	0.00960366		0.0981858	16.9648	2.62274	40.2753	903.554	112.942	7762.19	1.01007e+15		5.93597	0.057007	0.15526	0.00166367		3.60636	0.0518927	0.168465	0.00161788	0.667421			1003.65	9.63867	2404.68	9.10589		14538.1	2228.86	97194.5
OtterLake	Ap19D441	ok	915.904	8.31191	0.168435	0.00905421		0.107037	17.4625	2.58526	41.8072	934.696	115.744	7770.91	1.05114e+15		5.937	0.0537549	0.148152	0.00167906		3.44066	0.0499103	0.168435	0.00152505	0.62417			1003.48	9.08576	2324.71	9.71143		15806.6	2311.2	106099
OtterLake	AP19E056	ok	915.229	10.1243	0.176545	0.0106794		0.113503	13.8029	2.50375	30.7246	680.776	90.5144	7775.44	7.85189e+14		5.66428	0.0604911	0.184161	0.00270645		4.48286	0.0814382	0.176545	0.00188539	0.58786			1048.07	11.1928	2690.71	12.1429		11994.1	2155.01	78863.9
OtterLake	MY20B208	ok	908.886	7.10447	0.165815	0.00792395		0.123122	19.2223	2.72962	43.7242	991.379	131.109	7776.69	1132836427666550		6.03083	0.047788	0.142156	0.000924946		3.25006	0.0333228	0.165815	0.00131391	0.772842			989.01	7.83686	2253.64	5.61765		39122.7	5548.55	277465
OtterLake	DE05B023	ok	911.223	7.82646	0.168018	0.00861001		0.0867106	16.6048	2.50275	39.5776	910.007	115.052	7782.8	1.02553e+15		5.95175	0.0512446	0.150281	0.00139691		3.48146	0.044111	0.168018	0.00144664	0.679545			1001.18	8.62018	2349.13	7.94471		27100.1	4053.19	200322
OtterLake	AP19E026	ok	906.545	8.91971	0.166813	0.00976557		0.0924592	17.0122	2.51752	40.5303	919.285	114.093	7785.5	1.02355e+15		5.99474	0.058542	0.148811	0.00199605		3.42268	0.0567879	0.166813	0.00162902	0.588583			994.527	9.71213	2332.31	11.4845		14779	2169.82	99593.1
OtterLake	Ap19D442	ok	908.82	8.80109	0.166555	0.00964923		0.079636	16.7581	2.44128	39.6067	896.489	112.358	7786.39	1.00433e+15		6.00402	0.0579342	0.145648	0.00187691		3.34475	0.0538466	0.166555	0.00160713	0.599375			993.103	9.58268	2295.45	11.0766		15113.7	2174.54	102613
OtterLake	MY20B182	ok	894.945	7.63086	0.163358	0.00853962		0.101416	16.3957	2.34419	39.0288	908.157	113.816	7793.11	1.00109e+15		6.12152	0.0522755	0.142884	0.00146421		3.21829	0.0429298	0.163358	0.00139502	0.640183			975.411	8.32964	2262.45	8.83927		32979.9	4712.43	240648
OtterLake	MY20B227	ok	908.354	7.22016	0.166511	0.00802463		0.0982252	17.3532	2.53273	37.3352	845.336	117.568	7798.99	983970573914233		6.0056	0.0481927	0.145851	0.00106159		3.34853	0.0362775	0.166511	0.00133619	0.740698			992.861	7.96734	2297.84	6.25468		35860.7	5224.95	250623
OtterLake	AP01B395	ok	903.339	7.48493	0.166415	0.00832329		0.0919793	15.6444	2.33455	37.0948	889.752	111.712	7801.33	9.91106e+14		6.00906	0.0500151	0.149768	0.00125615		3.43647	0.0406063	0.166415	0.00138512	0.704391			992.331	8.25945	2343.27	7.17304		27766.6	4112.12	244157
OtterLake	Ma01D003	ok	913.666	8.90242	0.166422	0.00980913		0.0828512	16.3311	2.30407	38.8291	910.585	113.535	7802.58	1.02391e+15		6.00882	0.0589413	0.140818	0.00160912		3.23125	0.0486616	0.166422	0.00163246	0.65135			992.367	9.73426	2237.29	9.88327		14350	2023.7	120696
OtterLake	Ap19D426	ok	887.736	8.29311	0.164061	0.00927096		0.101871	16.5335	2.51722	39.4364	910.714	114.112	7804.41	995354491421684		6.09531	0.0565094	0.152527	0.00182069		3.45027	0.0521479	0.164061	0.001521	0.613397			979.303	9.07908	2374.46	10.1755		14621.1	2198.46	102295
OtterLake	AU20B016	ok	898.375	8.39174	0.165358	0.00937103		0.0920463	17.6504	2.62034	42.1972	941.836	117.892	7816.95	1041927847242970		6.04747	0.0566711	0.149216	0.00154433		3.40206	0.0474988	0.165358	0.00154958	0.671192			986.486	9.24439	2336.96	8.85707		17846.5	2651.68	123099
OtterLake	MA19a055	ok	896.054	8.72077	0.166141	0.00970717		0.112823	16.3142	2.53423	38.8689	886.221	111.459	7818.44	9.79424e+14		6.01897	0.0584272	0.154846	0.00176215		3.54713	0.0530572	0.166141	0.00161276	0.648972			990.815	9.61802	2400.14	9.67526		16000.6	2456.85	108558
OtterLake	Ap19D419	ok	920.49	8.4984	0.170051	0.00913579		0.0754341	17.1891	2.60649	41.0178	917.353	114.842	7822.74	1.04113e+15		5.88058	0.0537237	0.151546	0.00191203		3.55324	0.0553494	0.170051	0.00155355	0.586485			1012.39	9.24902	2363.44	10.7676		15372.6	2302.11	104159
OtterLake	MA19a005	ok	906.518	8.01674	0.168606	0.00880036		0.122629	17.9469	2.81046	42.781	938.529	118.516	7825.88	1051484510314224		5.93099	0.0521949	0.156996	0.00159709		3.64974	0.049093	0.168606	0.00148379	0.654249			1004.43	8.8393	2423.56	8.62812		17771.7	2743.07	116910
OtterLake	MY20B207	ok	893.679	8.38629	0.161639	0.00954401		0.0885452	16.4362	2.22413	39.151	906.044	112.345	7826.24	993459010453664		6.18661	0.059045	0.13583	0.00114769		3.02723	0.0385875	0.161639	0.00154269	0.748736			965.881	9.21838	2174.7	7.35806		30954.7	4183.59	220096
OtterLake	AP19E043	ok	926.951	12.9487	0.187988	0.0129495		0.196154	18.5489	4.09014	43.645	921.335	114.113	7830.44	1.04932e+15		5.31948	0.0688843	0.220367	0.00415334		5.71186	0.130615	0.187988	0.00243435	0.566287			1110.47	14.38	2983.37	15.1699		17033.6	3722.9	105165
OtterLake	Ap19D411	ok	911.727	8.82524	0.16861	0.00963521		0.0968472	16.9658	2.58112	40.5501	918.415	114.67	7839.21	1.03093e+15		5.93083	0.0571449	0.15254	0.00184811		3.54624	0.0548952	0.16861	0.0016246	0.622437			1004.45	9.67809	2374.59	10.3278		14917.6	2241.28	102304
OtterLake	AP19E042	ok	914.749	9.59629	0.170338	0.0103383		0.0974974	17.0662	2.69635	39.9862	901.523	112.929	7840.03	1.01669e+15		5.87067	0.0606928	0.157726	0.00228821		3.70439	0.0659909	0.170338	0.00176101	0.580339			1013.97	10.4828	2431.43	12.2948		14586.7	2284.42	96873.7
OtterLake	Ap19D403	ok	917.674	8.45171	0.170548	0.0091702		0.125324	17.4916	2.7308	42.0423	936.893	116.871	7860.67	1058533707365678		5.86344	0.0537689	0.156174	0.00169583		3.67246	0.0521956	0.170548	0.00156396	0.645211			1015.13	9.30896	2414.65	9.21817		15505	2390.52	105168
OtterLake	JA30A004	ok	911.504	9.50135	0.167122	0.0104234		0.0818329	17.1024	2.48626	40.2929	958.188	119.339	7861.8	1.07434e+15		5.98364	0.0623701	0.145936	0.00194073		3.36277	0.0568198	0.167122	0.00174199	0.616891			996.237	10.3842	2298.84	11.4265		11962.3	1771.23	107847
OtterLake	AU20B015	ok	906.561	9.7008	0.16974	0.0105469		0.108327	16.6752	2.71007	39.4149	866.596	109.46	7863.9	971032967277679		5.89137	0.0621355	0.162041	0.00229271		3.79236	0.0669251	0.16974	0.00179022	0.597645			1010.68	10.6595	2477.07	11.9357		16710.4	2718.19	113330
OtterLake	AP01B406	ok	915.542	10.1503	0.179801	0.0105594		0.184354	16.6979	3.31874	39.1854	896.054	112.314	7872.29	1.01167e+15		5.56172	0.0587283	0.197327	0.0028659		4.8919	0.0878416	0.179801	0.00189858	0.588053			1065.89	11.2551	2804.21	11.8755		31438.9	6198.96	261107
OtterLake	JL17C005	ok	891.401	8.85487	0.163881	0.00989058		0.0953928	16.8932	2.49717	40.2918	938.976	115.552	7874.17	1024049430382069		6.10199	0.0603522	0.148466	0.0019151		3.35472	0.0545299	0.163881	0.00162088	0.608476			978.309	9.67605	2328.33	11.049		12092.1	1766.99	88016
OtterLake	JL17C026	ok	903.209	9.72846	0.169318	0.0106096		0.0857888	13.1318	2.12369	25.1307	534.286	85.1964	7877.67	6.53092e+14		5.90606	0.0626612	0.163024	0.00231539		3.80589	0.0674707	0.169318	0.0017964	0.598468			1008.35	10.6982	2487.27	11.9689		9517.28	1522.72	65676
OtterLake	MY29A036	ok	886.488	7.67438	0.162991	0.00868293		0.0981865	16.3562	2.43734	39.5616	907.957	113.67	7877.96	9.90574e+14		6.13532	0.0532725	0.148634	0.00138396		3.34027	0.0425267	0.162991	0.00141524	0.682002			973.376	8.45175	2330.27	7.974		37636.5	5594.61	305854
OtterLake	AP19E046	ok	908.27	8.46591	0.166643	0.00923122		0.0873377	16.917	2.47615	40.1726	928.908	114.942	7879.41	1.03521e+15		6.00087	0.0553954	0.14653	0.00194336		3.36676	0.0544033	0.166643	0.00153832	0.571276			993.586	9.17202	2305.81	11.3872		14785.3	2144.72	100796
OtterLake	DE05B038	ok	918.744	10.3661	0.172734	0.0111702		0.128135	17.2369	2.85531	41.1712	916.937	115.86	7884.25	1.04208e+15		5.78924	0.0646671	0.164927	0.00230464		3.92801	0.0702704	0.172734	0.00192948	0.624397			1027.16	11.4736	2506.81	11.7529		27659	4548.27	199693
OtterLake	MA19a047	ok	908.671	10.4214	0.170827	0.0113183		0.0953278	16.3501	2.73717	38.7244	881.273	111.513	7907.14	9.90532e+14		5.85386	0.0662558	0.165066	0.00243336		3.88792	0.072259	0.170827	0.00193348	0.608985			1016.67	11.507	2508.23	12.3971		17613.3	2913.2	119359
OtterLake	MA19a054	ok	908.437	8.77827	0.172451	0.00950879		0.153168	17.5793	3.03666	41.7662	919.782	115.779	7908.3	1031580629087089		5.79876	0.0551392	0.172367	0.00195505		4.09846	0.0606609	0.172451	0.0016398	0.642448			1025.6	9.75221	2580.76	9.4707		16960.4	2895.78	110936
OtterLake	JL17C112	ok	852.311	10.4683	0.154324	0.012265		0.0354349	8.19438	1.11296	21.3163	520.307	58.2317	7909.81	5.23985e+14		6.47986	0.0794754	0.137657	0.0023921		2.92911	0.0623009	0.154324	0.00189279	0.576644			925.159	11.3471	2197.94	15.0941		6139.23	827.33	46326.8
OtterLake	AP19E014	ok	914.734	9.08628	0.168463	0.00992092		0.0841677	17.12	2.55366	40.6756	910.255	113.992	7910.08	1.02642e+15		5.93603	0.0588909	0.149284	0.00184102		3.46752	0.0548824	0.168463	0.00167131	0.626813			1003.64	9.957	2337.74	10.553		14678.7	2173.84	98300.8
OtterLake	JL17C182	ok	885.03	8.70192	0.16026	0.00989372		0.0907919	15.5	2.12327	36.4054	850.176	107.204	7913.66	9.28342e+14		6.23988	0.0617356	0.136929	0.00164283		3.02566	0.0470518	0.16026	0.00158556	0.636216			958.219	9.48035	2188.72	10.4319		11880.9	1618.09	87156
OtterLake	Ap19D402	ok	927.153	8.71354	0.171481	0.00936508		0.0939014	17.4668	2.65197	41.5134	930.624	116.207	7921.21	1.06325e+15		5.83155	0.054613	0.152291	0.00176731		3.60074	0.0536953	0.171481	0.00160593	0.628011			1020.27	9.55487	2371.81	9.89521		15106	2264.95	102030
OtterLake	JA30A022	ok	914.698	9.21818	0.168047	0.0100576		0.0750191	16.3027	2.39596	38.8656	919.661	114.772	7928.08	1.03569e+15		5.95072	0.05985	0.147417	0.00191446		3.4157	0.0561059	0.168047	0.00169015	0.612303			1001.34	10.0711	2316.18	11.1381		11938.8	1783.43	108179
OtterLake	AP01B407	ok	916.112	7.48871	0.170117	0.00804172		0.0892933	16.6693	2.60943	39.4597	920.805	115.354	7928.14	1040088465678939		5.87831	0.0472717	0.155575	0.00171791		3.64912	0.0498479	0.170117	0.00136803	0.588696			1012.76	8.1443	2408.13	9.38043		29953.5	4651.6	256005
OtterLake	Ap19D390	ok	929.412	9.32102	0.172288	0.0100951		0.109297	17.88	2.74482	42.7552	950.871	118.305	7934.82	1.08774e+15		5.80425	0.0585947	0.153973	0.00157322		3.65763	0.0525363	0.172288	0.00173927	0.702833			1024.7	10.3445	2390.52	8.69549		15718.4	2382.84	105660
OtterLake	AP19E040	ok	917.498	10.1196	0.17347	0.010876		0.0981746	12.2531	2.6778	23.5384	499.374	79.395	7944.51	6.19836e+14		5.76468	0.0626965	0.169176	0.00231454		4.04636	0.0707204	0.17347	0.00188666	0.622283			1031.2	11.2153	2549.51	11.4586		10521.8	2279.54	68434.7
OtterLake	MY20B183	ok	897.419	10.4206	0.166536	0.0111088		0.0956519	16.4149	2.59994	38.4901	888.149	111.262	7953.14	9.81726e+14		6.00472	0.0667051	0.155463	0.00330554		3.56974	0.0856365	0.166536	0.00185001	0.463067			992.996	11.031	2406.9	18.0647		33246.3	5262.45	236771
OtterLake	AP01B394	ok	916.338	6.92195	0.168687	0.00759218		0.0970298	16.081	2.4043	37.836	904.145	113.521	7964.14	1.02236e+15		5.92814	0.0450075	0.148925	0.00108515		3.46378	0.0364496	0.168687	0.0012807	0.721479			1004.87	7.62917	2333.62	6.23793		28366.2	4209.13	246526
OtterLake	DE05B033	ok	922.103	7.475	0.170846	0.00804707		0.0933765	17.1527	2.63032	40.6932	922.405	116.458	7987.86	1.05201e+15		5.85321	0.0471012	0.15374	0.00151771		3.62155	0.0461247	0.170846	0.00137481	0.631828			1016.77	8.18204	2387.95	8.40359		27272.6	4151.1	198458
OtterLake	AP24C015	ok	911.482	8.95295	0.1691	0.00978838		0.0891348	15.3492	2.36258	35.3935	790.521	102.974	8008.63	9.00943e+14		5.91366	0.0578851	0.154964	0.00182737		3.61307	0.0553719	0.1691	0.00165522	0.638701			1007.15	9.85838	2401.44	10.0244		13752.6	2086.67	94407.7
OtterLake	MA19a037	ok	893.832	10.1843	0.170533	0.0109093		0.149764	18.0052	3.18077	42.681	948.752	119.672	8034.17	1.04691e+15		5.86396	0.0639718	0.176381	0.00303798		4.14727	0.0845552	0.170533	0.0018604	0.53508			1015.05	11.0735	2619.14	14.3285		17386.2	3032.71	114894
OtterLake	AP19E039	ok	905.208	9.09309	0.166536	0.0100101		0.105616	16.7865	2.49033	39.9798	910.047	113.245	8042.51	1.01265e+15		6.00469	0.0601075	0.148701	0.00193081		3.41447	0.0559807	0.166536	0.00166704	0.610551			993	9.94001	2331.04	11.1189		14751.6	2169.63	99901.3
OtterLake	JA17A192	ok	873.918	8.59823	0.158735	0.00986662		0.0854626	15.469	2.15764	37.6954	895.024	109.207	8058.6	9.53174e+14		6.29982	0.0621579	0.139567	0.00172459		3.05461	0.0483014	0.158735	0.00156618	0.623971			949.741	9.37074	2221.84	10.7054		14026.8	2009.39	127543
OtterLake	AP24C016	ok	932.793	9.8826	0.178422	0.0103532		0.0843758	11.2234	1.99977	19.0303	384.796	71.7433	8074.77	5.21091e+14		5.60468	0.0580263	0.177599	0.00236825		4.3691	0.0737596	0.178422	0.00184724	0.613264			1058.35	10.9573	2630.58	11.081		9905.7	1739.38	64739.5
OtterLake	Ma01D002	ok	921.355	8.90879	0.166876	0.00972057		0.100867	16.0857	2.18978	38.0852	902.658	112.006	8083.32	1.0222e+15		5.99246	0.0582501	0.136254	0.00168741		3.13505	0.0493569	0.166876	0.00162214	0.617432			994.878	9.67079	2180.12	10.7782		14320.9	1948.61	120615
OtterLake	JL17C205	ok	891.186	8.14418	0.162481	0.00911217		0.0650994	15.9693	2.25395	38.2569	893.232	109.623	8103.34	9.72968e+14		6.15456	0.0560814	0.142065	0.00173742		3.18268	0.0485394	0.162481	0.00148055	0.597475			970.55	8.84381	2252.54	10.5602		12366.6	1736.42	90008.2
OtterLake	AU20B050	ok	944.671	13.1799	0.178457	0.0136306		0.107295	15.5546	2.63289	36.9603	840.297	106.134	8109.1	9.8319e+14		5.60358	0.0763799	0.168032	0.00340919		4.13453	0.101058	0.178457	0.00243247	0.557658			1058.54	14.4285	2538.13	17.0118		17495.6	2960.45	121652
OtterLake	AP19E058	ok	914.964	9.48923	0.168246	0.0103774		0.110852	16.8821	2.50213	40.2511	931.347	115.206	8116.12	1.04584e+15		5.94367	0.0616798	0.148099	0.00189387		3.43557	0.0565796	0.168246	0.00174596	0.630126			1002.44	10.4027	2324.09	10.9585		14628.6	2147.38	100084
OtterLake	JL17C111	ok	873.848	11.3734	0.16575	0.0125919		0.134706	16.376	2.82261	39.3721	915.711	112.164	8121.93	9.7646e+14		6.03317	0.075969	0.172406	0.00329448		3.94011	0.0901678	0.16575	0.00208711	0.550235			988.655	12.449	2581.14	15.955		13856.6	2369.66	100783
OtterLake	JA23C007	ok	911.684	9.46266	0.165935	0.010401		0.113834	18.6526	2.6115	44.5431	1026.19	128.172	8123.6	1.152e+15		6.02646	0.0626814	0.140276	0.00190612		3.20939	0.0549194	0.165935	0.00172589	0.607817			989.674	10.2936	2230.62	11.7611		16228	2251.69	128696
OtterLake	JA23A008	ok	899.91	9.42078	0.163726	0.0105209		0.125153	17.9084	2.51486	43.4938	1010.3	125.265	8124.38	1.11586e+15		6.10775	0.0642588	0.140239	0.00181163		3.16583	0.052744	0.163726	0.00172254	0.63149			977.453	10.2836	2230.16	11.1817		13973	2000.18	121641
OtterLake	MA19a018	ok	901.118	8.28141	0.165191	0.00921256		0.0744016	17.4392	2.544	41.2369	937.796	118.639	8140.93	1.04479e+15		6.05361	0.0557693	0.146038	0.00156797		3.32624	0.0470575	0.165191	0.00152183	0.651186			985.558	9.07951	2300.05	9.22411		17296.8	2488.73	117131
OtterLake	AP01B405	ok	896.094	6.81503	0.164242	0.00764497		0.0917705	15.8844	2.33363	37.6047	900.299	113.926	8144.17	997242629928624		6.08857	0.0465469	0.146022	0.00110339		3.30678	0.0355449	0.164242	0.00125563	0.711218			980.308	7.49442	2299.86	6.49192		28056.1	4089.26	248402
OtterLake	AP24C050	ok	916.705	9.13703	0.168266	0.0100283		0.11854	17.0655	2.49127	40.6764	926.403	116.312	8187.67	1.04796e+15		5.94295	0.0595979	0.146692	0.00162998		3.40334	0.0509405	0.168266	0.00168743	0.669995			1002.55	10.0539	2307.72	9.53843		14735.3	2101.35	99829.8
OtterLake	Ap19D416	ok	900.694	8.53753	0.166357	0.00945792		0.104767	16.8954	2.55581	40.6448	920.883	115.457	8224.97	1022108898050056		6.01117	0.0568531	0.151799	0.00172346		3.48185	0.0514509	0.166357	0.00157339	0.640048			992.008	9.38233	2366.29	9.68657		15074.6	2252.05	104492
OtterLake	JA17A172	ok	887.163	8.67834	0.160665	0.00985422		0.0838701	17.477	2.3954	41.1615	963.289	121.458	8245.35	1.05448e+15		6.22411	0.0613338	0.136974	0.00159481		3.03432	0.0462841	0.160665	0.00158323	0.646029			960.474	9.46473	2189.29	10.1231		15478	2179.43	137942
OtterLake	Ma01D027	ok	891.41	8.5378	0.160813	0.00965928		0.0933455	20.1398	2.69083	46.2803	1094.23	138.46	8277.03	1.20539e+15		6.21842	0.0600655	0.133876	0.00154331		2.96841	0.0446441	0.160813	0.00155333	0.64225			961.291	9.28538	2149.42	10.0669		18098.6	2419.43	151280
OtterLake	AU20B042	ok	904.887	8.66545	0.172757	0.00924393		0.12618	15.5074	2.7323	37.1899	828.672	103.743	8325.35	9.23762e+14		5.78848	0.0535083	0.176678	0.00231054		4.20841	0.0673973	0.172757	0.00159695	0.577208			1027.28	9.49613	2621.93	10.8764		15941.6	2808.55	108980
OtterLake	Ap24a016	ok	919.221	18.9506	0.187723	0.0190625		0.156976	12.1206	2.99339	31.8554	704.929	77.0449	8350.01	7.62293e+14		5.32699	0.101546	0.225395	0.00642148		5.83396	0.199983	0.187723	0.00357847	0.556098			1109.03	21.1409	3019.63	22.8604		21320.5	5216.84	148144
OtterLake	AP19E017	ok	911.172	9.07878	0.166791	0.00998469		0.110258	17.2689	2.49257	41.3318	936.402	116.072	8358.77	1.04772e+15		5.99554	0.0598636	0.144694	0.00177761		3.32753	0.0526785	0.166791	0.00166535	0.630701			994.404	9.92882	2284.14	10.5724		14805.9	2121.37	100067
OtterLake	Ap24a015	ok	886.975	7.50339	0.163085	0.00846975		0.099285	15.6634	2.31376	37.7166	910.726	114.997	8388.5	9.97246e+14		6.13179	0.0519347	0.148644	0.00139133		3.34241	0.0421926	0.163085	0.00138129	0.670957			973.896	8.24865	2330.38	8.01585		28233	4132.26	226652
OtterLake	AP24C051	ok	914.447	8.63831	0.16819	0.00946166		0.107588	16.982	2.51243	40.444	926.426	115.583	8389.23	1042899021386769		5.94564	0.0562557	0.148289	0.00164767		3.43885	0.0501862	0.16819	0.00159136	0.64833			1002.13	9.48185	2326.29	9.51947		14346.4	2072.87	96978.4
OtterLake	JA30A017	ok	885.611	10.2296	0.159146	0.0116518		0.0448685	15.3869	2.00751	37.7532	935.335	113.894	8392.29	1.00934e+15		6.28352	0.0732145	0.130992	0.00193703		2.87437	0.0541139	0.159146	0.00185435	0.618911			952.032	11.0929	2111.31	12.9683		11089.5	1471.41	105759
OtterLake	DE05B018	ok	897.913	7.79806	0.167205	0.008687		0.104007	17.5662	2.7786	41.5349	964.911	122.695	8441.52	1.07297e+15		5.98068	0.0519542	0.15808	0.00138518		3.64441	0.0449676	0.167205	0.00145251	0.704039			996.693	8.65827	2435.23	7.42319		28071.4	4405.46	208660
OtterLake	AP19E003	ok	916.892	8.65882	0.167808	0.00943648		0.118522	18.1448	2.61779	43.2961	988.589	122.699	8503.21	1.11392e+15		5.9592	0.0562339	0.144427	0.00175587		3.34166	0.051428	0.167808	0.00158351	0.613157			1000.02	9.43668	2280.96	10.466		15912.5	2280.9	108325
OtterLake	Ma01D010	ok	869.187	8.888	0.157625	0.0102639		0.075459	16.1606	2.23543	38.2949	928.283	116.201	8609.56	9.92009e+14		6.34418	0.0651157	0.138454	0.00178102		3.00906	0.049519	0.157625	0.00161784	0.623691			943.564	9.6846	2207.96	11.1614		13231.9	1830.07	115279
OtterLake	Ap19D378	ok	909.598	8.58219	0.166001	0.00942354		0.0889778	18.7522	2.6722	45.3301	1039.85	128.185	8629.23	1159063922115976		6.02405	0.0567679	0.142404	0.00177681		3.25938	0.0509637	0.166001	0.00156432	0.60268			990.041	9.32969	2256.64	10.7693		16350.9	2300.85	113630
OtterLake	Ap19D392	ok	900.015	8.10639	0.164902	0.00892515		0.0879409	17.3967	2.53929	41.9143	958.861	120.205	8630.99	1.06338e+15		6.06421	0.0541239	0.145661	0.00184824		3.31184	0.0513773	0.164902	0.00147177	0.575325			983.961	8.782	2295.6	10.9063		15179.4	2187.99	106544
OtterLake	AP19E008	ok	912.649	8.51983	0.166614	0.00930261		0.115973	19.142	2.73331	45.6979	1040.05	129.497	8645.51	1167540599066531		6.0019	0.0558333	0.142593	0.00181981		3.27576	0.0517335	0.166614	0.00154994	0.58904			993.428	9.24147	2258.94	11.0125		16509	2341.35	112385
OtterLake	Ap19D377	ok	902.359	8.16328	0.165832	0.00896782		0.0974591	17.869	2.63251	43.0408	990.069	122.197	8681.7	1.09484e+15		6.03021	0.0540779	0.147928	0.00183187		3.38235	0.051715	0.165832	0.00148715	0.586528			989.103	8.8701	2322.11	10.6142		15741.1	2289.99	109442
OtterLake	Ap24a055	ok	920.62	14.2322	0.177023	0.0147623		0.147219	17.6149	3.44119	41.6021	942.916	119.375	8743.48	1.07466e+15		5.64898	0.0833917	0.181724	0.00434559		4.43552	0.12465	0.177023	0.00261326	0.525298			1050.69	15.5106	2668.67	19.7996		29313.2	5660.33	214756
OtterLake	Ap19D383	ok	903.968	7.88695	0.164696	0.00873492		0.0814497	19.5139	2.7397	46.8081	1094.53	134.761	8744.99	1.21156e+15		6.07179	0.0530366	0.141231	0.00154596		3.20712	0.0449134	0.164696	0.00143861	0.623732			982.821	8.58487	2242.36	9.46237		16669.3	2311.06	116999
OtterLake	Ap24a014	ok	891.572	7.72277	0.165997	0.00858572		0.0924795	16.5822	2.60848	39.4928	939.289	117.859	9033.17	1.03176e+15		6.02422	0.0517223	0.158085	0.0016256		3.6182	0.0484697	0.165997	0.0014252	0.640912			990.015	8.49999	2435.28	8.71123		29599.9	4613.86	230118
OtterLake	AP19E002	ok	902.141	8.77812	0.163587	0.00974043		0.0958709	18.3547	2.52558	43.9227	1019.59	127.2	9067.22	1131550150490869		6.11296	0.0595429	0.137609	0.00180621		3.10382	0.0507319	0.163587	0.00159341	0.595928			976.679	9.51327	2197.33	11.4019		16090.1	2199.83	112263
OtterLake	AP19E053	ok	896.257	8.93534	0.165835	0.00988148		0.0937826	16.2722	2.47662	38.79	903.891	111.624	9164.74	9.92656e+14		6.03008	0.0595861	0.153265	0.00201682		3.50446	0.0576699	0.165835	0.0016387	0.600473			989.124	9.774	2382.67	11.2079		14334.4	2161.34	98615.7
OtterLake	AP19E035	ok	901.848	20.6097	0.178264	0.02158		0.194894	19.2747	3.96333	45.2419	944.031	116.612	9199.8	1.04362e+15		5.60967	0.121057	0.202234	0.0067357		4.97072	0.19727	0.178264	0.00384692	0.543762			1057.48	22.8204	2844.31	27.1354		14617.1	2980.42	88800
OtterLake	AP24C039	ok	918.379	9.25949	0.167889	0.0101885		0.0771866	17.5998	2.51966	41.7434	961.125	121.81	9243.4	1.09304e+15		5.9563	0.0606861	0.143519	0.00151975		3.32226	0.0488199	0.167889	0.00171055	0.693344			1000.47	10.1933	2270.1	9.12643		14848.7	2082.6	103104
OtterLake	AU20B043	ok	918.45	14.066	0.174521	0.0149306		0.105483	16.1439	2.75209	37.5631	846.281	107.518	9375.47	9.63367e+14		5.72997	0.0855518	0.172911	0.00377141		4.16074	0.109977	0.174521	0.0026057	0.564866			1036.97	15.4826	2586.02	18.2028		17016.9	2900.56	115769
OtterLake	Ap19D391	ok	894.539	11.8873	0.164144	0.0131851		0.0840265	18.0919	2.62573	42.9612	971.598	121.396	9470.15	1.06934e+15		6.0922	0.0803265	0.146932	0.00283994		3.32539	0.077805	0.164144	0.00216426	0.563534			979.766	12.9183	2310.52	16.587		14115	2022.97	96215.1
OtterLake	AP19E016	ok	886.085	9.12797	0.162358	0.0102167		0.0932396	17.0822	2.50601	40.8706	952.66	117.669	9494.47	1033838666847714		6.15922	0.0629268	0.146013	0.00213175		3.26864	0.0582453	0.162358	0.00165876	0.573344			969.868	9.90883	2299.75	12.5433		14509	2113.02	100505
OtterLake	AP24C038	ok	896.004	9.73637	0.163616	0.0109695		0.0868843	16.572	2.37557	39.3832	926.541	117.448	9515.68	1.02684e+15		6.11187	0.0670443	0.143164	0.00169197		3.2297	0.0520778	0.163616	0.00179479	0.680294			976.841	10.7155	2265.83	10.1905		14033.1	1971.26	99861.6
OtterLake	AP19E052	ok	891.386	8.86393	0.162819	0.00992706		0.0898567	16.1385	2.30769	38.3231	903.998	112.804	9517.44	9.90801e+14		6.14178	0.0609698	0.143489	0.00188024		3.22126	0.0529555	0.162819	0.00161632	0.603858			972.425	9.65332	2269.74	11.294		14189.3	2010.15	99473
OtterLake	Ap19D436	ok	892.996	10.8508	0.166067	0.0118103		0.10383	16.8215	2.67434	39.9318	903.707	113.379	9536.42	994292793877643		6.02165	0.0711175	0.157169	0.00308009		3.59875	0.082343	0.166067	0.00196131	0.516162			990.407	11.697	2425.43	16.6185		14970	2350.53	102215
OtterLake	AP19E036	ok	880.003	9.94577	0.163934	0.0106282		0.093798	16.7848	2.67394	40.4203	930.496	114.823	9565.07	1.00219e+15		6.10001	0.0648321	0.158747	0.00349579		3.5882	0.0877378	0.163934	0.00174232	0.43466			978.602	10.4008	2442.36	18.6417		14382.4	2271.88	98788.9
OtterLake	Ap19D413	ok	890.861	8.71341	0.161974	0.00984438		0.0755985	16.4595	2.30779	39.2023	923.923	115.788	9660.51	1.01358e+15		6.17381	0.0607773	0.139945	0.0016052		3.1254	0.0472418	0.161974	0.00159454	0.651279			967.74	9.5268	2226.53	9.93223		14674.4	2031.92	104730
OtterLake	Ap19D412	ok	894.505	9.04226	0.162517	0.0101193		0.0762126	16.4712	2.2959	39.7895	939.22	115.515	9811.67	1027842103360946		6.1532	0.0622661	0.13929	0.00186852		3.1212	0.0524464	0.162517	0.00164456	0.602221			970.75	9.82331	2218.4	11.6261		14609.2	2011.04	103952
OtterLake	Ap19D437	ok	880.449	8.83502	0.160974	0.0100596		0.0747105	16.0038	2.30294	38.034	893.218	111.53	10211.3	9.66621e+14		6.2122	0.0624923	0.144464	0.00174576		3.2064	0.0504157	0.160974	0.00161933	0.639783			962.185	9.67921	2281.41	10.4025		14029	1993.81	99036.2
OtterLake	AU20B045	ok	913.407	8.90921	0.16742	0.00973069		0.0679434	16.2573	2.367	39.0351	899.415	113.125	10263.5	1.01424e+15		5.97299	0.0581213	0.145659	0.00186244		3.36238	0.0540262	0.16742	0.00162912	0.605601			997.882	9.71008	2295.58	10.9902		16458.2	2395.82	116904
OtterLake	AU20B044	ok	925.229	9.04058	0.169554	0.00966539		0.083139	17.2035	2.4896	40.6708	912.005	115.323	10455.4	1.04445e+15		5.89784	0.0570049	0.145243	0.00211694		3.39551	0.059383	0.169554	0.0016388	0.552665			1009.65	9.75867	2290.66	12.5343		16533.7	2392.32	113177
OtterLake	AU20B048	ok	924.418	18.5276	0.178985	0.0185864		0.138343	17.0676	3.27564	40.341	911.699	115.837	10467.8	1044951691272789		5.58706	0.103844	0.186772	0.00659162		4.60925	0.183851	0.178985	0.00332669	0.465973			1061.43	19.7281	2713.95	29.0974		18730	3593.71	129630
OtterLake	AU20B047	ok	906.176	8.22213	0.165736	0.00906096		0.0852106	16.215	2.32445	38.9766	903.306	114.919	10562.2	1014357788079759		6.03368	0.054671	0.144156	0.00167732		3.29421	0.048581	0.165736	0.00150173	0.614413			988.576	8.95745	2277.73	10.02		16404.2	2351	118595
OtterLake	AU20B046	ok	910.596	8.52805	0.165775	0.00935427		0.071892	16.025	2.24075	38.394	898.085	112.998	11029.1	1.0096e+15		6.03226	0.0564274	0.140481	0.00177594		3.211	0.0504973	0.165775	0.00155071	0.594815			988.793	9.24943	2233.15	10.9389		16086.4	2248.87	115750
OtterLake	OC02B030	ok	912.544	9.55841	0.168648	0.0105009											5.9295	0.0622652	0.15201	0.00181511		3.53471	0.0562065	0.168648	0.00177096	0.660381			1004.66	10.5498	2368.66	10.185		12994.7	1960.4	91766.2
OtterLake	OC02B036	ok	923.299	9.48858	0.171693	0.010204											5.82434	0.0594313	0.1565	0.00204599		3.70484	0.0614417	0.171693	0.00175195	0.615283			1021.43	10.4227	2418.19	11.0944		13633.7	2118.52	94501.6
OtterLake	OC02B037	ok	919.638	8.90006	0.171702	0.00956271											5.82404	0.0556936	0.159636	0.00199204		3.77928	0.0594154	0.171702	0.00164194	0.608263			1021.48	9.76815	2451.81	10.5535		13341.6	2118.29	92670.8
OtterLake	OC02B035	ok	884.785	9.52001	0.169382	0.0104869											5.90382	0.0619126	0.179065	0.00240883		4.18195	0.0713311	0.169382	0.00177629	0.614818			1008.71	10.5782	2644.23	11.1641		12507	2255.84	87985.6

## Sheet: 401Apatite
			207 cor 206Pb/238U		206Pb/238U			Pb204	Pb206	Pb207	Pb208	Th232	U238	140Ce	Radiation dose		Data for Tera-Wasserburg plot						Data for Wetherill plot						206Pb/238U		207Pb/206Pb		Pb206	Pb207	U238
	File ID	Comment	age	+/-1 ster	ratio	+/-1 RSE		ppm	ppm	ppm	ppm	ppm	ppm	ppm	decays / mg		238U/206Pb	1 std. error	207Pb/206Pb	1 std. error		207Pb/235U	1 std. error	206Pb/238U	1 std. error	Rho			age	+/-1 std err	age	+/-1 ster	raw cps	raw cps	raw cps
401-apatite	SE24A268	ok	495.479	7.47158	0.0809073	0.0152192		0.00101343	1.19292	0.0795157	2.78629	125.688	16.7865	9412.69	7.68427e+13		12.3598	0.188106	0.0672996	0.0020277		0.75076	0.025342	0.0809073	0.00123134	0.450869			501.536	7.63296	847.058	31.3295	2541.69	161.759	27204.6
401-apatite	SE24A269	ok	508.371	8.8804	0.0824052	0.0176852		0.000384534	1.04228	0.062935	2.4794	112.108	14.3774	8236.98	6.9341e+13		12.1352	0.214613	0.0609037	0.00213544		0.69199	0.0271746	0.0824052	0.00145735	0.450347			510.463	9.02765	635.834	37.7302	2213.85	127.604	23193.2
401-apatite	SE24A270	ok	487.122	8.15504	0.0796405	0.0168779		4.70645e-08	1.01345	0.0683271	2.53486	113.378	14.5004	8562.76	67055263151075		12.5564	0.211925	0.0685915	0.00230734		0.753192	0.0283468	0.0796405	0.00134416	0.448455			493.977	8.33727	886.48	34.7622	2170.95	139.685	23555.2
401-apatite	SE24A271	ok	497.826	8.19595	0.0813345	0.0166811		0.00158645	1.31791	0.0870829	3.20297	144.905	18.5164	8991.74	8.76059e+13		12.2949	0.205092	0.0676477	0.00188087		0.758628	0.0245977	0.0813345	0.00135675	0.514467			504.083	8.40864	857.778	28.8623	2806.15	176.919	29852.8
401-apatite	SE24A272	ok	509.939	12.65	0.0846091	0.0248017		4.31208e-08	0.938831	0.0743998	2.21099	102.623	13.1131	8782.61	6.3592e+13		11.8191	0.293133	0.0795275	0.00431209		0.92776	0.0553173	0.0846091	0.00209845	0.415965			523.575	12.9856	1185.3	53.559	2194.97	165.933	23178.7
401-apatite	SE24A273	common Pb inc in middle	518.495	13.3198	0.0853727	0.0259324		0.0096617	0.976226	0.0696068	2.26438	105.162	13.6711	9540.74	6.67011e+13		11.7133	0.303755	0.0731329	0.00352456		0.860862	0.0471132	0.0853727	0.00221392	0.473842			528.113	13.6952	1017.64	48.8059	2334.89	158.777	24683.2
401-apatite	SE24A274	ok	494.87	9.32555	0.080449	0.0190636		0.0111733	0.94881	0.0607849	2.45382	111.155	13.6559	9678	6.58705e+13		12.4302	0.236965	0.0637405	0.00231861		0.707029	0.0290366	0.080449	0.00153365	0.464191			498.802	9.50897	733.03	38.5227	2052.6	125.385	22267.3
401-apatite	SE24A275	common Pb in 1st half	501.781	11.5795	0.0818962	0.0232778		0.0119257	1.0143	0.066627	2.58772	116.152	13.8222	10024.7	6.90533e+13		12.2106	0.284235	0.0666759	0.00319903		0.752894	0.04015	0.0818962	0.00190636	0.436506			507.431	11.8119	827.666	50.0434	1934.11	121.114	19835.9
401-apatite	SE24A276	ok	501.521	7.98203	0.0818208	0.0160136		4.77727e-08	1.01113	0.0670485	2.32044	106.059	14.3177	8394.89	6.59142e+13		12.2218	0.195716	0.0663603	0.00238808		0.748641	0.0294879	0.0818208	0.00131025	0.406554			506.982	8.11861	817.762	37.5943	2133.7	134.849	22703.6
401-apatite	SE24A277	ok	505.667	8.20478	0.0824605	0.0163004		0.00517208	0.961678	0.0621879	2.41769	110.672	13.5388	10078	6.69529e+13		12.127	0.197675	0.0658496	0.00255501		0.748687	0.0315089	0.0824605	0.00134414	0.387315			510.792	8.3261	801.6	40.6388	2036.53	125.488	21511.5
401-apatite	SE24A278	ok	503.396	8.35132	0.0819497	0.0167363		4.77525e-08	0.986588	0.0636432	2.54796	116.321	14.0201	10574.9	6.96869e+13		12.2026	0.204227	0.064555	0.00230129		0.729422	0.0287259	0.0819497	0.00137154	0.424977			507.75	8.49788	759.865	37.5888	2082.74	127.994	22172.7
401-apatite	SE24A279	ok	505.114	8.37371	0.0830533	0.0166705		0.00990458	0.985021	0.0715163	2.45375	111.183	13.8274	10277.8	6.75751e+13		12.0405	0.20072	0.072494	0.00251653		0.830157	0.0319685	0.0830533	0.00138454	0.432898			514.322	8.57398	999.841	35.2497	2082.05	143.977	21861.9
401-apatite	SE24A256	ok	507.696	9.35237	0.0829168	0.0185857		0.0244872	1.07205	0.0703607	2.71283	117.383	14.3491	7738.54	7.12865e+13		12.0603	0.224149	0.0669945	0.00255355		0.765919	0.0324793	0.0829168	0.00154107	0.438284			513.51	9.54394	837.601	39.6933	2260.23	142.014	23427.6
401-apatite	SE24A257	ok	488.57	8.76963	0.0799895	0.0181111		0.00466825	1.01313	0.0702702	2.63686	113.124	14.0278	7600.75	6.63784e+13		12.5016	0.226419	0.0696625	0.00240402		0.768304	0.0299434	0.0799895	0.0014487	0.464706			496.06	8.98421	918.42	35.4845	2129.77	141.386	22802.2
401-apatite	SE24A258	ok	494.072	7.99934	0.0806344	0.0162932		4.86157e-08	0.964234	0.0645954	2.04132	89.83	13.2614	7035.63	5.68832e+13		12.4017	0.202062	0.066922	0.00239268		0.744031	0.0292335	0.0806344	0.00131379	0.414683			499.908	8.1451	835.349	37.2462	1999.92	128.204	21237.1
401-apatite	SE24A259	ok	497.466	8.19968	0.0811351	0.0165843		4.94758e-08	1.10634	0.0730536	3.32261	146.615	15.1531	10384.2	8.25141e+13		12.3251	0.204404	0.0662706	0.0024615		0.741363	0.0301568	0.0811351	0.00134557	0.407703			502.894	8.34017	814.935	38.8201	2254.74	142.437	23808.8
401-apatite	SE17A046	ok	530.831	11.0549	0.086556	0.0211204		5.18532e-08	1.0811	0.0700713	2.65744	118.341	14.0405	7944.47	7.44613e+13		11.5532	0.244008	0.0648536	0.00243763		0.773985	0.0333697	0.086556	0.0018281	0.489872			535.137	11.3023	769.592	39.5702	2132.64	136.921	32170.6
401-apatite	SE17A047	ok	496.475	10.6506	0.08137	0.0216612		0.0122278	0.978251	0.0678705	2.28376	103.559	13.5531	7352.86	6.2975e+13		12.2895	0.266206	0.0702256	0.00283131		0.787882	0.0360596	0.08137	0.00176257	0.473284			504.295	10.9236	934.957	41.3501	1981.99	136.204	31838.4
401-apatite	SE17A048	ok	510.858	11.3267	0.0831811	0.0223797		5.09344e-08	1.04807	0.0678516	2.91782	128.191	14.206	9660.66	7.58003e+13		12.022	0.269048	0.0644418	0.00305271		0.739084	0.038722	0.0831811	0.00186157	0.427159			515.083	11.5274	756.164	49.9797	2105.66	135.019	33034.4
401-apatite	SE17A049	ok	519.698	11.4526	0.0846819	0.0223145		5.04701e-08	1.07192	0.0692449	3.04028	130.128	14.202	9721.95	7.79241e+13		11.8089	0.263509	0.0647019	0.00271462		0.755456	0.0358998	0.0846819	0.00188963	0.469573			524.008	11.693	764.658	44.205	2173.84	139.082	33277.1
401-apatite	SE24A260	ok	493.303	8.5285	0.0805447	0.0174427		0.0123829	1.05965	0.0698493	3.02929	135.829	14.7046	9907.96	7.69062e+13		12.4155	0.216559	0.0673068	0.00234693		0.747476	0.0291429	0.0805447	0.00140492	0.447381			499.373	8.71042	847.281	36.2566	2177.13	137.266	23257.2
401-apatite	SE24A261	ok	507.526	8.31764	0.0826928	0.0165248		0.00438776	1.07666	0.0697212	2.90747	126.209	14.5366	9126.33	7.50801e+13		12.093	0.199834	0.0650925	0.00232408		0.742164	0.0291989	0.0826928	0.00136648	0.420019			512.176	8.46361	777.327	37.5418	2214.5	137.133	22982.2
401-apatite	SE24A262	ok	510.133	8.92588	0.0835778	0.0176986		4.85905e-08	1.08437	0.0739013	3.15352	136.735	14.5534	10601	7.96935e+13		11.9649	0.211762	0.0694371	0.00220303		0.800173	0.02907	0.0835778	0.00147921	0.487168			517.443	9.15804	911.753	32.6572	2250.14	146.612	23178.3
401-apatite	SE24A263	ok	506.241	8.70148	0.0824917	0.0173052		4.90713e-08	1.08428	0.0702393	3.21628	140.685	14.7817	11052.3	8.10235e+13		12.1224	0.209782	0.0652205	0.00255027		0.741815	0.0317204	0.0824917	0.00142754	0.404701			510.979	8.84261	781.457	41.0873	2227.88	137.949	23276.1
401-apatite	SE24A264	ok	508.4	8.23461	0.0846781	0.0162516		0.0108843	1.10208	0.0902626	3.18638	135.08	14.7181	10000.5	7.90447e+13		11.8094	0.191923	0.082619	0.00257154		0.964611	0.0338701	0.0846781	0.00137616	0.462843			523.986	8.51563	1260.23	30.415	2275.01	178.061	23249.3
401-apatite	SE24A265	ok	509.276	8.55582	0.0830434	0.0169353		4.92156e-08	1.07794	0.0703856	2.99209	131.594	14.6988	9276.16	7.77661e+13		12.0419	0.203932	0.0656641	0.00240613		0.751856	0.0303503	0.0830434	0.00140636	0.41953			514.263	8.70918	795.687	38.4154	2208.3	137.766	23008.1
401-apatite	SE24A266	ok	500.259	7.9069	0.0818667	0.015959		4.95779e-08	1.20932	0.0828529	2.9344	128.394	16.7188	9220.5	7.8544e+13		12.215	0.194939	0.0688805	0.0021021		0.777508	0.0267765	0.0818667	0.00130651	0.4634			507.255	8.09527	895.164	31.4942	2459.32	160.945	25939.3
401-apatite	SE24A267	ok	489.772	7.98546	0.0803321	0.0164248		0.00259744	1.09737	0.0766533	2.70211	120.382	15.5929	9128.23	7.19223e+13		12.4483	0.204462	0.0710715	0.0023049		0.787201	0.028617	0.0803321	0.00131944	0.451817			498.105	8.18128	959.47	33.1359	2258.26	150.644	24444.1
401-apatite	OC30C160	ok	515.775	12.4628	0.0848317	0.0244005		9.32893e-08	1.04423	0.0735641	2.97711	128.182	13.6802	9406.77	7.56209e+13		11.7881	0.287634	0.0723522	0.00326407		0.846274	0.043405	0.0848317	0.00206994	0.47574			524.898	12.8078	995.865	45.838	1144.77	82.3434	18804.4
401-apatite	OC30C161	ok	516.671	13.656	0.0845358	0.0265773		9.23107e-08	1.04978	0.0714222	2.98739	128.207	13.684	9427.43	7.57725e+13		11.8293	0.314392	0.0681263	0.0041004		0.794066	0.0522456	0.0845358	0.00224673	0.403942			523.14	13.9037	872.4	62.3357	1163.04	80.8078	19009.4
401-apatite	OC30C162	ok	500.044	11.7797	0.0816962	0.0237346		0.0038714	1.01495	0.0674797	2.82064	128.522	13.8731	9590.36	7.37189e+13		12.2405	0.290522	0.0675616	0.0033828		0.761033	0.0421692	0.0816962	0.00193903	0.428341			506.24	12.0154	855.135	51.9976	1114.86	75.7107	19108.3
401-apatite	JA05B252	ok	504.251	8.0372	0.0826575	0.0160893		5.49062e-08	1.35958	0.0938686	4.06938	172.226	18.6857	11573.7	9.98016e+13		12.0981	0.19465	0.0700702	0.00214946		0.798577	0.027662	0.0826575	0.0013299	0.464483			511.965	8.23714	930.411	62.9675	2543.61	177.758	44639.6
401-apatite	JA05B253	ok	503.074	7.8804	0.0821365	0.0158203		0.00381483	1.33516	0.0896166	3.96427	169.185	18.4796	11780.4	9.80171e+13		12.1749	0.19261	0.0669139	0.00207976		0.757799	0.0264289	0.0821365	0.00129943	0.453619			508.863	8.05037	835.096	64.7608	2553.19	173.464	45145.5
401-apatite	JA05B254	ok	508.018	7.95638	0.0826471	0.0157937		5.31804e-08	1.33517	0.0842434	3.70608	160.033	18.3617	10390.8	9.51741e+13		12.0996	0.191098	0.0638468	0.00221704		0.727559	0.0277544	0.0826471	0.00130531	0.414019			511.904	8.08487	736.56	73.5054	2578.62	164.689	45324.7
401-apatite	JA05B255	ok	503.719	8.39651	0.0820903	0.0168332		5.25072e-08	1.33693	0.0868163	3.68819	161.232	18.531	10410.9	95109108721599		12.1817	0.205058	0.0654076	0.00222844		0.740323	0.0281335	0.0820903	0.00138185	0.442961			508.587	8.56117	787.476	71.53	2614.94	171.885	46346.9
401-apatite	JA05B256	ok	512.855	7.82461	0.0836301	0.0153831		0.00957295	1.35446	0.0884803	3.6342	159.585	18.4124	10151.1	9.60126e+13		11.9574	0.183943	0.0655631	0.00218031		0.756003	0.0277005	0.0836301	0.00128649	0.419837			517.754	7.96469	792.459	69.7632	2611.65	172.696	45417.4
401-apatite	JA05B257	ok	510.951	8.0339	0.0836483	0.0158649		0.013018	1.35811	0.0927633	3.79058	161.715	18.4797	10415.2	9.66131e+13		11.9548	0.189662	0.0687989	0.00217784		0.793487	0.028096	0.0836483	0.00132707	0.448058			517.863	8.21585	892.715	65.3605	2612.21	180.609	45491
401-apatite	JA05B258	ok	514.304	7.57552	0.0840512	0.0148073		5.26493e-08	1.34313	0.0898871	3.662	156.604	18.1841	10147.6	9.4695e+13		11.8975	0.17617	0.0672815	0.00229582		0.779724	0.0290034	0.0840512	0.00124458	0.398079			520.259	7.70366	846.5	70.9697	2619.44	177.454	45408.2
401-apatite	JA05B259	ok	517.19	8.49102	0.0844807	0.0166235		5.25312e-08	1.35585	0.0904937	3.72134	156.834	18.2629	10141.5	9.54715e+13		11.837	0.196772	0.066776	0.0020113		0.77782	0.0267592	0.0844807	0.00140436	0.4832			522.812	8.69096	830.794	62.8011	2650.01	179.044	45724.5
401-apatite	JA05B260	ok	512.896	7.16484	0.0836651	0.0140223		5.24378e-08	1.32488	0.0867193	3.69707	157.09	18.0305	10117.1	9.4355e+13		11.9524	0.1676	0.065834	0.00226327		0.759444	0.0281968	0.0836651	0.00117318	0.377672			517.962	7.26301	801.103	72.0201	2593.92	171.872	45239.6
401-apatite	JA05B261	ok	508.945	8.0217	0.0834699	0.0159078		5.30757e-08	1.33659	0.0940273	3.72795	157.281	18.2023	10140.1	9.39831e+13		11.9804	0.190582	0.070314	0.00215025		0.809232	0.0278949	0.0834699	0.00132783	0.461487			516.801	8.22119	937.536	62.7032	2585.23	184.106	45138.4
401-apatite	JA05B262	ok	497.375	7.88583	0.0813008	0.0159989		5.19585e-08	1.28833	0.0868206	3.57706	155.343	18.0165	10098.1	90727331574924		12.3	0.196787	0.06806	0.0021495		0.762936	0.0270107	0.0813008	0.00130073	0.451901			503.883	8.06159	870.381	65.4394	2545.31	173.642	45654.8
401-apatite	JA05B263	ok	505.264	7.90587	0.082899	0.0158047		0.00383261	1.31155	0.0911835	3.68379	157.885	17.9909	10091.8	9.31605e+13		12.0629	0.190651	0.0707625	0.00206173		0.808823	0.0268097	0.082899	0.0013102	0.476814			513.403	8.1142	950.561	59.6206	2586.74	182.057	45531.1
401-apatite	JA05B264	ok	513.153	8.32285	0.0838269	0.0163489		5.304e-08	1.31887	0.0870812	3.65263	158.66	18.0719	10116.6	95104299350296		11.9294	0.195032	0.0669765	0.00233393		0.774117	0.0297969	0.0838269	0.00137048	0.42474			518.924	8.48384	837.043	72.5847	2552.17	170.594	44893.3
401-apatite	JA05B265	ok	509.39	7.90944	0.0829236	0.0156169		5.22722e-08	1.32568	0.0828693	3.05924	137.737	18.2816	9252.34	8.64392e+13		12.0593	0.188329	0.0643152	0.00238411		0.735348	0.029579	0.0829236	0.00129501	0.388244			513.55	8.02006	752.014	78.2728	2602.85	164.718	46097.8
401-apatite	JA05B266	ok	505.808	7.70092	0.08277	0.015329		0.0112769	1.3747	0.0941491	3.23976	141.996	18.9038	9559.13	8.85666e+13		12.0817	0.1852	0.0686321	0.00224384		0.783252	0.0282824	0.08277	0.00126878	0.424521			512.635	7.85818	887.703	67.5578	2664.65	184.752	47077.4
401-apatite	JA05B274	ok	512.3	7.33062	0.0842847	0.0143817		0.00459174	1.34211	0.0991735	3.15127	136.103	18.2241	9369.27	8.61931e+13		11.8646	0.170632	0.0727083	0.00221885		0.844956	0.0285055	0.0842847	0.00121216	0.426299			521.647	7.50216	1005.83	61.9201	2786.76	208.491	48771.4
401-apatite	JA05B275	ok	514.023	7.25122	0.0843704	0.0141843		0.00772737	1.33344	0.0934674	3.21383	137.076	18.1086	9412.5	8.66785e+13		11.8525	0.168119	0.0707727	0.00217327		0.823298	0.0278484	0.0843704	0.00119673	0.419337			522.156	7.40641	950.855	62.8342	2767.51	196.409	48459.1
401-apatite	JA05B276	ok	513.523	7.59073	0.0843032	0.0149138		4.84727e-08	1.31003	0.092201	3.17764	135.603	17.79	9258.14	8.54445e+13		11.8619	0.176906	0.0709328	0.00205149		0.824504	0.0268297	0.0843032	0.00125728	0.458316			521.757	7.78137	955.477	59.137	2771.88	197.524	48552.2
401-apatite	JA05B277	ok	512.09	8.61709	0.0837096	0.0169907		0.0076521	1.23319	0.0827303	2.91761	128.433	16.8252	9461.4	8.06526e+13		11.9461	0.202972	0.0675566	0.00228259		0.779731	0.0294889	0.0837096	0.00142228	0.449259			518.227	8.80503	854.982	70.1791	2616.89	177.752	46069.6
401-apatite	JA05B278	ok	517.151	7.66606	0.0841448	0.0149588		4.91135e-08	1.26252	0.0800846	3.00005	131.271	17.0832	9530.88	8.3071e+13		11.8843	0.177775	0.063625	0.00207771		0.73817	0.0265141	0.0841448	0.00125871	0.416464			520.815	7.7908	729.188	69.2091	2636.2	169.312	46043.9
401-apatite	JA05B279	ok	501.904	7.07795	0.0819002	0.0142297		4.83787e-08	1.41711	0.0932798	3.33294	144.792	19.7879	8426.74	9.04693e+13		12.21	0.173744	0.0665135	0.00193146		0.751098	0.0242887	0.0819002	0.00116541	0.440034			507.455	7.22091	822.578	60.6254	3003.77	200.195	54160.5

## Sheet: Durango
			207 cor 206Pb/238U		206Pb/238U			Pb204	Pb206	Pb207	Pb208	Th232	U238	Ce140	Radiation dose		Data for Tera-Wasserburg plot					Data for Wetherill plot						206Pb/238U		207Pb/206Pb		Pb206	Pb207	U238
	File ID	Comment	age	+/-1 ster	ratio	+/-1 RSE		ppm	ppm	ppm	ppm	ppm	ppm	ppm	decays / mg		238U/206Pb	1 std. error	207Pb/206Pb	1 std. error		207Pb/235U	1 std. error	206Pb/238U	1 std. error	Rho		age	+/-1 std err	age	+/-1 ster	raw cps	raw cps	raw cps
Durango	MY20B166	ok	30.4895	2.89318	0.00642042	0.073854		5.15511e-08	0.0607674	0.015455	0.373505	252.798	10.708	4350.39	7.00258e+12		155.753	11.503	0.253719	0.0348726		0.224604	0.0350453	0.00642042	0.000474173	0.473328		41.2564	3.04695	3208.12	108.597	122.01	31.0241	22749.4
Durango	MY20B167	ok	32.5539	2.5829	0.00646468	0.0671294		0.0111183	0.0617622	0.0135183	0.394711	256.087	10.8082	4319.62	7.57043e+12		154.687	10.384	0.218349	0.0262896		0.194625	0.0268293	0.00646468	0.00043397	0.48697		41.5399	2.78855	2968.55	97.032	123.561	27.0378	22870.2
Durango	MY20B185	ok	32.4017	2.40798	0.00646771	0.0644774		0.00774546	0.0637471	0.014158	0.397577	262.103	11.1516	4349.06	7.7214e+12		154.614	9.96913	0.221543	0.0228427		0.197565	0.0240254	0.00646771	0.000417022	0.530208		41.5593	2.67964	2991.94	82.9283	129.986	28.8494	23872
Durango	MY20B210	ok	31.9849	4.40689	0.00591609	0.0808083		0.00563119	0.0503154	0.0138236	0.346308	217.272	9.661	4135.65	6.36163e+12		169.031	13.6591	0.172687	0.0744268		0.140863	0.0617686	0.00591609	0.000478069	0.184283		38.0252	3.07275	2583.86	359.763	100.51	27.5779	20050.2
Durango	MY20B230	ok	31.9614	3.44737	0.00675233	0.0712049		0.0146888	0.0529863	0.012603	0.31095	201.189	8.59385	4097.22	5.84982e+12		148.097	10.5452	0.25561	0.0472843		0.237976	0.0471708	0.00675233	0.000480799	0.359227		43.382	3.08901	3219.85	146.022	110.94	26.3401	18537.7
Durango	MY20B250	ok	33.7947	4.31663	0.0069732	0.0715155		5.93245e-05	0.0581131	0.014083	0.310882	200.478	9.3969	3758.66	6.25546e+12		143.406	10.2558	0.241665	0.0632816		0.232353	0.0630714	0.0069732	0.000498692	0.26346		44.7961	3.20362	3130.97	208.182	122.156	29.5356	20179.2
Durango	MY20B251	ok	32.9689	3.23859	0.00670114	0.0726308		5.0116e-08	0.0578548	0.0134951	0.329605	212.718	9.73231	3963.88	6.44946e+12		149.228	10.8386	0.232609	0.0401501		0.21492	0.0402472	0.00670114	0.000486709	0.387848		43.0542	3.12706	3070.09	137.916	119.519	27.8146	20531
Durango	MY20B252	ok	33.5584	8.8777	0.00679364	0.0834294		0.00754876	0.0494562	0.0114148	0.300719	195.811	8.20928	3995.92	5.96137e+12		147.196	12.2805	0.230164	0.152984		0.215596	0.144425	0.00679364	0.000566789	0.124542		43.6465	3.6414	3053.19	531.833	103.089	23.7384	17466.7
Durango	MY20B253	ok	33.4133	2.65956	0.00706064	0.0647455		0.0114312	0.0564009	0.0128623	0.303065	201.253	8.90053	4066.94	6.15083e+12		141.63	9.16992	0.255728	0.0269948		0.248957	0.0308294	0.00706064	0.000457144	0.52284		45.3559	2.93659	3220.58	83.3212	117.314	26.6908	18889
Durango	MY20B271	ok	31.1767	2.79254	0.00632803	0.065349		0.0114518	0.0608263	0.0139807	0.374055	248.531	10.6327	4262.16	7.05042e+12		158.027	10.3269	0.231786	0.0372071		0.202235	0.0350505	0.00632803	0.000413531	0.377052		40.6646	2.65739	3064.42	128.322	129.091	29.5883	22848.5
Durango_AB axis	MY29A087	ok	33.7613	1.9103	0.00693065	0.0466875		0.00682561	0.0717796	0.0149466	0.417176	267.645	11.3647	4469.65	8.21343e+12		144.287	6.73638	0.23859	0.0191308		0.227997	0.0211546	0.00693065	0.000323574	0.503181		44.5237	2.0787	3110.59	63.8535	241.692	50.2549	44433.9
Durango_AB axis	MY29A089	ok	34.3009	2.06662	0.00703549	0.0514287		3.08626e-08	0.0686988	0.0142786	0.423277	259.813	10.8557	4453.66	8.081e+12		142.137	7.3099	0.238077	0.0188172		0.230947	0.0217776	0.00703549	0.000361826	0.54539		45.1949	2.32431	3107.16	62.9598	230.709	47.8842	42320.4
Durango_AB axis	MY29A091	ok	34.2087	1.889	0.00682036	0.045786		3.01546e-08	0.0693964	0.0138582	0.416685	261.472	11.2761	4440.49	8.14975e+12		146.62	6.71314	0.220786	0.0190497		0.207625	0.0202802	0.00682036	0.000312277	0.468749		43.8176	2.00623	2986.43	69.4278	238.533	47.5694	44981.2
Durango_AB axis	MY29A093	ok	31.3763	2.12539	0.00682124	0.0589333		0.00575031	0.0670373	0.0156969	0.412888	258.711	10.8752	4548.66	7.36656e+12		146.601	8.63967	0.272085	0.0188298		0.255899	0.0232609	0.00682124	0.000401998	0.648341		43.8233	2.58265	3318.08	54.2125	225.736	52.7866	42487.8
Durango_AB axis	MY29A095	ok	31.3357	1.95931	0.00670722	0.0531095		2.99527e-08	0.0639642	0.0158299	0.391338	248.849	10.4637	4369.36	7.07688e+12		149.093	7.91826	0.263191	0.018897		0.243397	0.0217371	0.00670722	0.000356218	0.594682		43.0932	2.28866	3265.91	56.4718	221.361	54.7124	42002.2
Durango_AB axis	MY29A097	ok	28.5642	2.47301	0.00649935	0.0606862		4.88628e-08	0.0632032	0.0145009	0.371844	251.885	10.5659	4543.79	6.52666e+12		153.862	9.33728	0.297346	0.0333522		0.266461	0.0339819	0.00649935	0.000394421	0.475856		41.7619	2.53437	3456.45	86.9593	134.084	30.7251	25992.6
Durango_AB axis	MY29A105	ok	30.1527	2.34803	0.00652183	0.0649278		4.96031e-08	0.0665538	0.0151561	0.0825895	259.224	11.2061	4458.49	7.12333e+12		153.331	9.95545	0.269187	0.0244349		0.242061	0.0270149	0.00652183	0.000423448	0.581773		41.9059	2.72086	3301.3	71.1989	139.106	31.6438	27130.9
Durango_AB axis	MY29A107	ok	32.9425	2.5874	0.00670232	0.064355		0.00236598	0.063529	0.0128301	0.350701	230.55	10.2471	4163.52	6.95228e+12		149.202	9.60189	0.233202	0.0272924		0.215506	0.028783	0.00670232	0.000431327	0.481842		43.0618	2.77124	3074.15	93.4801	132.984	26.8289	24839.8
Durango_AB axis	MY29A109	ok	29.7927	2.60406	0.00660357	0.0706847		0.0086348	0.0565569	0.0130562	0.32495	210.42	9.46324	4102.28	5.74864e+12		151.433	10.704	0.282962	0.0285291		0.257637	0.0317235	0.00660357	0.000466771	0.574054		42.4294	2.99911	3379.35	78.6138	121.704	28.0671	23575.5
Durango_AB axis	MY29A111	ok	31.0528	2.70152	0.00674788	0.0693861		0.00362482	0.0588773	0.0142851	0.348475	224.38	9.79896	4286.63	6.36011e+12		148.195	10.2826	0.271832	0.0297324		0.252912	0.0327596	0.00674788	0.000468209	0.535676		43.3535	3.00813	3316.62	85.6912	125.723	30.474	24217.7
Durango_AB axis	MY29A112	ok	31.802	2.61766	0.00669205	0.0622749		0.0104193	0.0626313	0.0124279	0.380054	245.245	10.4111	4393.96	7.08852e+12		149.431	9.3058	0.253292	0.0315076		0.233712	0.0325118	0.00669205	0.000416747	0.447665		42.996	2.67757	3205.46	98.3041	133.961	26.5567	25769.9
Durango_AB axis	MY29A114	ok	30.3508	2.35759	0.00634878	0.0644641		0.0201705	0.0620963	0.0130371	0.370011	250.475	10.7076	4387.08	6.91631e+12		157.511	10.1538	0.249809	0.0255048		0.218675	0.026404	0.00634878	0.000409268	0.533884		40.7975	2.62997	3183.56	80.8258	134.689	28.2524	26870.3
Durango_AB axis	MY29A116	ok	30.387	2.65998	0.00642056	0.0702057		0.0168907	0.065456	0.0134427	0.396697	259.337	11.1374	4411.53	7.17461e+12		155.75	10.9345	0.2557	0.0304834		0.226363	0.0313176	0.00642056	0.00045076	0.507444		41.2573	2.8965	3220.4	94.1009	140.009	28.7287	27554.2
Durango_AB axis	MY29A118	ok	29.8016	2.5244	0.0064794	0.065139		4.81396e-08	0.0659226	0.0140052	0.372005	255.491	11.1532	4435.88	6.94942e+12		154.335	10.0532	0.272136	0.0306434		0.243121	0.0316268	0.0064794	0.000422062	0.500735		41.6342	2.71201	3318.38	88.206	142.011	30.145	27782.2
Durango_AB axis	MY29A120	ok	27.5649	2.21985	0.0059306	0.0685944		4.88288e-08	0.0614596	0.0138579	0.404647	257.802	11.1111	4366.39	6.47266e+12		168.617	11.5662	0.266174	0.0240986		0.217653	0.0247227	0.0059306	0.000406806	0.603891		38.1182	2.61469	3283.63	71.1109	130.533	29.4093	27280.5
Durango_AB axis	MY29A122	ok	24.301	2.93303	0.00606885	0.0774861		4.88272e-08	0.0597657	0.0131581	0.376785	251.325	10.5839	4376.71	5.54267e+12		164.776	12.7678	0.345482	0.0455316		0.28909	0.0441969	0.00606885	0.000470252	0.506834		39.0041	3.02228	3687.19	100.525	126.945	27.9273	25980.8
Durango_AB axis	MY29A129	ok	26.1526	2.51798	0.00631178	0.0656478		3.2506e-05	0.0595383	0.0154959	0.35326	241.28	10.3206	4305.62	5.74053e+12		158.434	10.4008	0.328337	0.0358273		0.285741	0.0363872	0.00631178	0.000414354	0.515519		40.5605	2.66271	3609.33	83.6772	126.422	32.8831	25303
Durango_AB axis	MY29A131	ok	27.7997	2.78564	0.00654946	0.0675854		4.88421e-08	0.0587871	0.0137858	0.35835	224.778	9.72312	4245.6	5.69485e+12		152.684	10.3192	0.31588	0.0386049		0.285252	0.0398374	0.00654946	0.000442647	0.483939		42.0829	2.84418	3549.89	94.1128	124.849	29.2606	23836
Durango_AB axis	MY29A133	ok	31.9615	2.63134	0.00687438	0.0648388		4.8526e-08	0.0602036	0.0136298	0.378756	234.492	9.97064	4315.48	6.81341e+12		145.468	9.43196	0.265969	0.0290418		0.252095	0.0320142	0.00687438	0.000445726	0.510573		44.1634	2.86351	3282.41	85.7718	128.695	29.1202	24596.4
Durango_AB axis	MY29A135	ok	27.135	2.42123	0.00626978	0.0705394		0.0105361	0.0603847	0.0153781	0.386653	246.847	10.5356	4414.91	6.09174e+12		159.495	11.2507	0.305606	0.0290314		0.264189	0.0312594	0.00626978	0.000442266	0.596165		40.2914	2.84213	3498.87	73.4211	131.705	33.5243	26510.9
Durango_AB axis	MY29A137	ok	28.0189	2.43682	0.00621611	0.0650062		4.74614e-08	0.0609765	0.0127214	0.382468	252.401	10.6568	4405.61	6.42139e+12		160.872	10.4577	0.283475	0.032017		0.24296	0.0316616	0.00621611	0.000404085	0.498835		39.9476	2.59684	3382.18	88.0463	133.281	27.7933	26866.5
Durango_C_axis	MY29A086	ok	26.3263	2.00163	0.00579306	0.0564907		5.02455e-08	0.0783596	0.0184507	0.501028	324.106	14.8552	4780.59	7.8472e+12		172.62	9.75144	0.278923	0.0283878		0.222789	0.0259333	0.00579306	0.000327254	0.485302		37.2367	2.10353	3356.91	79.4917	161.629	38.0019	35584.5
Durango_C_axis	MY29A088	ok	31.856	1.92042	0.0060631	0.0526407		0.00536053	0.0797425	0.0136779	0.463816	314.268	14.3267	4668.18	9.20104e+12		164.932	8.68215	0.191452	0.0190459		0.16005	0.0180137	0.0060631	0.000319166	0.467707		38.9672	2.05126	2754.67	81.7111	165.927	28.4204	34610.7
Durango_C_axis	MY29A090	ok	31.7339	1.93408	0.00641502	0.052419		4.99871e-08	0.0851553	0.0165463	0.450395	317.608	14.6275	4759.13	9.27846e+12		155.884	8.1713	0.229307	0.0189158		0.202823	0.0198233	0.00641502	0.000336269	0.536326		41.2218	2.1608	3047.22	66.0378	176.567	34.2609	35203.7
Durango_C_axis	MY29A092	ok	35.228	2.16377	0.00670605	0.0544728		0.0110437	0.0882168	0.0153	0.441516	315.705	14.4503	4716.03	1.02294e+13		149.119	8.12293	0.191499	0.0184274		0.177066	0.0195791	0.00670605	0.000365297	0.492629		43.0857	2.347	2755.08	79.0352	185.576	32.1425	35273.5
Durango_C_axis	MY29A094	ok	31.3874	2.28913	0.00649636	0.0558786		0.0152821	0.0801425	0.0159108	0.431558	285.973	13.3892	4542.75	8.28527e+12		153.932	8.60152	0.243518	0.0278774		0.218123	0.0277862	0.00649636	0.000363008	0.43865		41.7428	2.33253	3143.1	90.9229	169.305	33.5685	32813
Durango_C_axis	MY29A096	ok	30.5232	2.06245	0.00623828	0.0563953		4.97021e-08	0.0835574	0.0169308	0.473135	315.997	14.5496	4757.54	8.87842e+12		160.301	9.0402	0.235968	0.0224064		0.202964	0.0224152	0.00623828	0.000351809	0.510643		40.0896	2.26086	3092.97	75.7272	174.268	35.2664	35192.4
Durango_C_axis	MY29A098	ok	28.0538	2.11765	0.00590073	0.0623596		0.00817221	0.0770498	0.0163998	0.470234	306.622	14.0421	4578.87	7.91044e+12		169.47	10.5681	0.253067	0.024863		0.205894	0.0239591	0.00590073	0.000367967	0.53589		37.9268	2.3651	3204.05	77.6503	165.596	35.2034	34991
Durango_C_axis	MY29A106	ok	32.649	2.06621	0.006307	0.0547665		0.0185347	0.0838347	0.0154415	0.460513	318.26	14.6494	4728.77	9.56505e+12		158.554	8.68346	0.200978	0.0202539		0.174772	0.0200458	0.006307	0.000345412	0.47749		40.5298	2.21968	2834.15	82.1798	175.826	32.3507	35584.1
Durango_C_axis	MY29A108	ok	32.5782	2.30326	0.00608917	0.0560384		4.91633e-08	0.0821103	0.0151155	0.478644	320.145	14.6947	4743.72	9.59643e+12		164.226	9.20295	0.1796	0.0284685		0.150788	0.0253511	0.00608917	0.000341227	0.333316		39.1343	2.19302	2649.18	131.486	173.167	31.8452	35883
Durango_C_axis	MY29A110	ok	27.1388	1.95381	0.00562952	0.0594929		0.0201317	0.0748118	0.0153642	0.472053	317.186	14.5074	4657.85	7.91421e+12		177.635	10.568	0.244883	0.0240219		0.190078	0.0218069	0.00562952	0.000334916	0.518563		36.1885	2.15296	3151.98	77.8555	160.671	32.9646	36066.3
Durango_C_axis	MY29A113	ok	30.1395	1.9504	0.00598057	0.055605		0.00573992	0.0789615	0.015565	0.493385	317.511	14.5382	4778.22	8.80078e+12		167.208	9.2976	0.217903	0.0205411		0.179683	0.0196654	0.00598057	0.00033255	0.508062		38.4384	2.13737	2965.26	75.9918	167.431	32.9734	35669.8
Durango_C_axis	MY29A115	ok	28.6623	2.04274	0.00567805	0.0603889		4.83929e-08	0.0748142	0.0145309	0.480015	315.457	14.4004	4707.05	8.31076e+12		176.117	10.6355	0.216898	0.0235344		0.169807	0.0210862	0.00567805	0.000342891	0.486311		36.4995	2.20417	2957.8	87.5248	160.313	31.1094	35695.5
Durango_C_axis	MY29A117	ok	29.3183	2.06599	0.00597908	0.0568611		4.85301e-08	0.0789261	0.0154597	0.474808	316.989	14.5216	4759.46	8.54737e+12		167.25	9.51001	0.234676	0.0251153		0.193466	0.0234458	0.00597908	0.000339977	0.469195		38.4289	2.18511	3084.21	85.4116	168.652	33.0066	35885.8
Durango_C_axis	MY29A119	ok	30.8982	2.05841	0.00607865	0.0572559		0.0100297	0.0801575	0.0155073	0.477682	315.401	14.4544	4672.47	8.96391e+12		164.51	9.41917	0.212533	0.0213362		0.178129	0.0205864	0.00607865	0.000348038	0.495421		39.0669	2.23681	2924.96	81.2102	172.27	33.3003	35915.9
Durango_C_axis	MY29A121	ok	30.0046	1.97302	0.00619009	0.0579645		0.00354194	0.0784591	0.0164183	0.433832	306.693	13.9371	4588.09	8.45252e+12		161.549	9.36408	0.241601	0.018492		0.206204	0.0197979	0.00619009	0.000358805	0.603724		39.7809	2.30588	3130.54	60.853	166.034	34.7173	34090.2
Durango_C_axis	MY29A123	ok	27.1157	2.04701	0.00592897	0.0550113		0.0134174	0.077706	0.017161	0.474034	314.111	14.4795	4697.46	7.84073e+12		168.663	9.27838	0.275352	0.029037		0.225097	0.0267731	0.00592897	0.00032616	0.462512		38.1078	2.09636	3336.77	82.4898	163.938	36.1783	35299.1
Durango_C_axis	MY29A130	ok	31.4866	2.03696	0.00626898	0.0524816		0.0255073	0.0817347	0.0152272	0.468376	312.452	14.3398	4674.22	9.05146e+12		159.515	8.37163	0.219973	0.0233974		0.190138	0.0225518	0.00626898	0.000329006	0.442481		40.2863	2.11429	2980.5	85.6317	173.818	32.3628	35205.6
Durango_C_axis	MY29A132	ok	30.2386	1.77319	0.0061049	0.0463488		0.0181352	0.0800244	0.0155323	0.466962	310.223	14.3169	4655.63	8.63813e+12		163.803	7.59207	0.228543	0.0218709		0.192375	0.0204553	0.0061049	0.000282955	0.435895		39.2351	1.8185	3041.87	76.6439	172.29	33.4218	35575.5
Durango_C_axis	MY29A134	ok	30.347	2.02738	0.00639024	0.0553883		4.701e-08	0.0823347	0.0186558	0.474148	309.084	14.1076	4629.69	8.62184e+12		156.489	8.66764	0.253704	0.0217906		0.223535	0.0228454	0.00639024	0.000353945	0.541958		41.0631	2.27442	3208.03	67.8624	181.684	41.1453	35920.1
Durango_C_axis	MY29A136	ok	29.3421	1.97271	0.00596528	0.0559862		0.00375084	0.0775935	0.0151104	0.468075	314.03	14.4011	4671.1	8.47587e+12		167.637	9.38535	0.232788	0.0225231		0.191467	0.0214029	0.00596528	0.000333973	0.500843		38.3404	2.14654	3071.32	77.2997	168.346	32.7675	36041.9

## Sheet: Emerald Lake
			207 cor 206Pb/238U		206Pb/238U			Pb204	Pb206	Pb207	Pb208	Th232	U238	140Ce	Radiation dose		Data for Tera-Wasserburg plot						Data for Wetherill plot					206Pb/238U		207Pb/206Pb		Pb206	Pb207	U238
			age	+/-1 ster	ratio	+/-1 RSE		ppm	ppm	ppm	ppm	ppm	ppm	ppm	decays / mg		238U/206Pb	1 std. error	207Pb/206Pb	1 std. error		207Pb/235U	1 std. error	206Pb/238U	1 std. error	Rho		age	+/-1 std err	age	+/-1 ster	raw cps	raw cps	raw cps
Emerald Lake	MY15B091	line at 3um/sec	91.1738	1.84793	0.0221523	0.0161067		0.0130324	1.00153	0.328903	1.35291	152.316	51.8755	3154.37	2.61812e+13		45.1419	0.727089	0.332358	0.00529519		1.01514	0.0229983	0.0221523	0.000356802	0.710948		141.244	2.27499	3627.99	12.2019	3016.76	993.173	190338
Emerald Lake	MY15B092	line at 3um/sec	92.4544	2.45073	0.0273314	0.0165196		0.0119684	0.82082	0.344113	1.1312	84.9231	34.3986	1781.44	1.64585e+13		36.5879	0.604418	0.424621	0.0074597		1.60017	0.0385878	0.0273314	0.000451504	0.685038		173.825	2.87152	3998.64	13.1337	2498.71	1050.11	127511
Emerald Lake	MY15B108	line at 3um/sec	91.2972	2.33291	0.0261258	0.0160959		0.0261167	0.789013	0.317603	1.12003	91.2797	34.8099	2285.31	1.6822e+13		38.2764	0.616091	0.410459	0.00744654		1.47856	0.0358596	0.0261258	0.000420517	0.663664		166.255	2.67602	3947.84	13.6055	2372.25	956.737	126753
Emerald Lake	MY15B109	line at 3um/sec	93.7313	1.99727	0.0237948	0.0160727		0.0251482	0.943192	0.332097	1.2894	135.183	45.8074	2977.92	2.38208e+13		42.026	0.675472	0.354546	0.00578515		1.1632	0.0266417	0.0237948	0.000382448	0.701752		151.595	2.43654	3726.64	12.413	2904.75	1024.68	170795
Emerald Lake	MY15B116	line at 3um/sec	91.8647	2.31329	0.0275681	0.0153873		0.0302695	0.853773	0.363617	1.19116	93.0232	35.6924	1811.94	1.73159e+13		36.2738	0.558158	0.430978	0.0068463		1.63819	0.0362301	0.0275681	0.000424199	0.695755		175.31	2.69755	4020.84	11.8599	2590.66	1105.16	130814
Emerald Lake	MY15B117	line at 3um/sec	90.1263	2.47554	0.0278195	0.0157584		0.0319951	0.761251	0.329618	1.05388	76.226	31.4091	1826.69	1.45557e+13		35.9461	0.566453	0.44263	0.00772061		1.69782	0.0399103	0.0278195	0.000438391	0.670376		176.887	2.78745	4060.63	12.9912	2337.89	1013.93	116470
Emerald Lake	MY15B123	line at 3um/sec	89.2515	2.89065	0.027382	0.020368		0.0121409	0.731056	0.315008	0.982547	71.9218	30.8639	1969.07	1.3958e+13		36.5203	0.743844	0.440085	0.00908451		1.66151	0.048183	0.027382	0.000557716	0.702355		174.142	3.54693	4052.04	15.3825	2269.86	979.457	115476
Emerald Lake	MY15B124	line at 3um/sec	92.09	2.84111	0.0277291	0.0207801		0.0242527	0.719711	0.30476	0.982639	70.4501	30.1257	1919.16	1.40779e+13		36.0632	0.749396	0.432407	0.00823885		1.65322	0.0466092	0.0277291	0.000576212	0.737065		176.32	3.66394	4025.79	14.2208	2221.29	941.902	112003
Emerald Lake	SE24A007	ok	90.8443	3.03295	0.0286759	0.0203299		0.01002	0.6831	0.300472	1.04088	69.9643	28.1237	1801.93	1.32577e+13		34.8725	0.708954	0.451752	0.00927455		1.78615	0.0516068	0.0286759	0.000582977	0.703632		182.256	3.70524	4090.99	15.2632	1337.52	594.046	58233.8
Emerald Lake	SE24A031	ok	91.3868	2.80159	0.0280084	0.0186768		0.0228986	0.819219	0.351707	1.14041	88.0446	33.1497	1802.94	1.61144e+13		35.7036	0.666828	0.43975	0.00869515		1.69822	0.0461901	0.0280084	0.000523105	0.686669		178.071	3.32579	4050.9	14.7354	1672.29	721.328	69728.9
Emerald Lake	SE24A153	ok	84.7927	2.63447	0.0254629	0.0197993		0.0114272	0.85847	0.361246	1.2635	98.3414	33.8145	2067.7	1.58031e+13		39.2728	0.777574	0.430989	0.00879068		1.51313	0.043012	0.0254629	0.000504148	0.696524		162.09	3.20926	4020.88	15.2278	1751.48	721.63	61545.2
Emerald Lake	SE24A252	ok	86.811	2.57352	0.0256518	0.0193651		0.0233788	0.797382	0.331317	1.12909	87.1577	34.1134	1881.21	1.55167e+13		38.9836	0.75492	0.424229	0.00830305		1.50044	0.0413119	0.0256518	0.000496749	0.703337		163.277	3.16187	3997.26	14.6334	1686.19	671.322	56194.3
Emerald Lake	SE24A282	ok	91.6895	2.4678	0.0255513	0.0184328		0.00364293	0.879509	0.346415	1.26238	113.013	40.6598	2106.12	2.01865e+13		39.1369	0.721405	0.398625	0.00769121		1.40436	0.0374742	0.0255513	0.000470984	0.69078		162.645	2.99801	3903.9	14.5096	1877.42	703.83	64622.2
Emerald Lake	Ap24a005	ok	94.4872	2.49259	0.026541	0.0179274		0.0280449	0.845252	0.332112	1.11496	83.975	38.1161	2231.55	1.79021e+13		37.6775	0.67546	0.402287	0.00745844		1.47216	0.0379671	0.026541	0.000475812	0.695129		168.863	3.02728	3917.65	13.9304	1479.81	576.502	73202.9
Emerald Lake	Ap24a006	ok	91.8649	2.81633	0.027791	0.018904		0.0147496	0.7983	0.341929	1.07862	78.8329	34.3022	1981.45	1.5892e+13		35.9829	0.680222	0.43436	0.0087993		1.66439	0.0461175	0.027791	0.000525362	0.682251		176.708	3.3405	4032.51	15.1138	1389.04	589.866	65452.9
Emerald Lake	Ap24a017	ok	97.6209	2.0263	0.0237067	0.0153332		0.0243026	1.25781	0.411252	1.52599	153.223	63.734	2743.03	3.18992e+13		42.1821	0.646789	0.332155	0.00632734		1.08571	0.0265497	0.0237067	0.000363501	0.62703		151.04	2.31593	3627.06	14.5901	2229.8	722.272	123468
Emerald Lake	Ap24a018	ok	95.6119	1.93761	0.0225557	0.0158628		0.0167519	1.35343	0.419947	1.69825	195.247	72.2312	2911.18	3.69975e+13		44.3347	0.703274	0.316957	0.00583954		0.985729	0.0239649	0.0225557	0.000357797	0.652474		143.788	2.28088	3555.13	14.1822	2350.72	722.559	137053
Emerald Lake	Ap24a033	ok	98.2981	2.98843	0.0278037	0.0207914		0.0120634	0.689412	0.273938	0.924556	72.286	30.1044	2074.35	1.5166e+13		35.9665	0.747793	0.405507	0.00882134		1.55454	0.0467787	0.0278037	0.000578077	0.690934		176.787	3.67566	3929.62	16.3328	1171.04	460.52	55613.7
Emerald Lake	Ap24a034	ok	96.9246	3.04887	0.0275686	0.0207224		0.018769	0.65362	0.257661	0.892649	74.2244	28.6691	2063.33	1.46427e+13		36.2731	0.751666	0.407953	0.00946793		1.5507	0.0482475	0.0275686	0.000571289	0.666027		175.313	3.63292	3938.65	17.415	1115.31	435.106	53188.6
Emerald Lake	Ap24a056	ok	92.7276	2.16834	0.0226475	0.0184267		0.01272	1.27608	0.420102	1.54656	166.558	67.9213	2693.05	3.25139e+13		44.1551	0.813633	0.335052	0.0065044		1.04624	0.0280036	0.0226475	0.000417318	0.68844		144.366	2.6602	3640.35	14.8551	2113.54	687.722	121583
Emerald Lake	Ap24a057	ok	93.9708	2.12238	0.0231974	0.0173275		0.0264075	1.17012	0.391139	1.48696	147.68	60.6113	2558.52	2.93371e+13		43.1082	0.746957	0.340518	0.0064246		1.08913	0.0278999	0.0231974	0.000401952	0.676416		147.832	2.56156	3665.1	14.4128	1962.84	648.464	109857
Emerald Lake	DE05B004	ok	97.3791	4.4069	0.0313419	0.0258338		0.0137969	0.638703	0.282294	0.879704	52.0451	24.1098	1418.1	1.15921e+13		31.9061	0.824256	0.459813	0.0136184		1.98705	0.078093	0.0313419	0.00080968	0.657331		198.941	5.13941	4117.26	21.9849	1115.88	489.116	44494.2
Emerald Lake	DE05B020	ok	90.8613	2.59183	0.0239091	0.0192251		0.0306748	1.10505	0.397659	1.39482	129.965	53.5666	2621.23	2.50254e+13		41.825	0.804091	0.371944	0.00921067		1.22615	0.0384401	0.0239091	0.000459655	0.613235		152.314	2.92826	3799.36	18.7481	1800.65	642.928	92982.5
Emerald Lake	DE05B034	ok	91.9561	2.74235	0.0235869	0.0213431		0.017713	1.11075	0.391663	1.35586	129.366	54.5298	2464.63	2.55759e+13		42.3963	0.90487	0.35961	0.00944098		1.16951	0.0395698	0.0235869	0.000503419	0.630811		150.286	3.20757	3748.21	19.9431	1778.39	622.431	93613.8
Emerald Lake	DE05B063	ok	90.372	3.29353	0.0256467	0.0231394		0.0104336	0.894818	0.35135	1.18606	95.3755	40.7765	2164.74	1.86986e+13		38.9913	0.902235	0.406747	0.0116348		1.43833	0.052919	0.0256467	0.00059345	0.628924		163.245	3.77739	3934.21	21.4702	1442.59	562.62	71303.7
Emerald Lake	NO12B455	ok	89.53	2.09087	0.022984	0.0176788		0.00855145	1.22395	0.432107	1.54995	148.736	58.6791	2706.48	2.74497e+13		43.5086	0.769179	0.359982	0.00637907		1.14079	0.0285553	0.022984	0.000406328	0.706272		146.487	2.58971	3749.78	13.4598	2268.08	806.251	138394
Emerald Lake	NO12B509	ok	89.4891	2.22932	0.024663	0.0169396		0.0134728	0.889357	0.341483	1.22228	104.385	39.6017	2616.58	1.87936e+13		40.5465	0.686843	0.393524	0.00711973		1.33819	0.0331667	0.024663	0.000417783	0.683472		157.059	2.66053	3884.52	13.6224	1714.42	663.204	97298.2
Emerald Lake	NO12B538	ok	91.0215	2.57118	0.0267675	0.0187553		0.0337644	0.810041	0.332733	1.10649	76.531	33.3781	1976.11	1.53085e+13		37.3588	0.700676	0.422328	0.00773108		1.55869	0.0408503	0.0267675	0.000502033	0.71563		170.285	3.19376	3990.54	13.6923	1542.23	638.427	81055.4
Emerald Lake	NO12B566	ok	96.0596	1.80509	0.0225833	0.0151876		0.0204295	1.35103	0.420847	1.651	176.302	65.6731	2890.62	3.37065e+13		44.2806	0.672513	0.315124	0.00491333		0.981227	0.0213575	0.0225833	0.000342985	0.697761		143.962	2.18642	3546.2	12.0098	2485.42	780.48	154211
Emerald Lake	NO12B615	ok	91.8485	1.84464	0.0220763	0.0157416		0.0308101	1.27189	0.410345	1.61373	170.186	63.3481	2848.22	3.1088e+13		45.2975	0.713057	0.326757	0.0055259		0.994607	0.0229794	0.0220763	0.000347516	0.681339		140.765	2.21586	3601.93	12.9752	2497.99	812.872	159009
Emerald Lake	Ap19D381	ok	91.5596	3.30042	0.0223205	0.0276227		0.0237546	1.03334	0.335029	1.38437	164.186	52.3986	3579.72	2.72883e+13		44.8019	1.23755	0.33408	0.011415		1.02815	0.0451742	0.0223205	0.000616551	0.628682		142.305	3.93084	3635.91	26.154	906.404	290.199	46719
Emerald Lake	Ap19D382	ok	90.7698	4.44089	0.026406	0.031516		0.0048771	0.772436	0.307258	1.0009	78.7036	33.2931	2341.9	1.53929e+13		37.8702	1.19352	0.417644	0.0155055		1.52058	0.0740511	0.026406	0.000832213	0.647159		168.015	5.29518	3973.85	27.7977	673.451	264.533	29503
Emerald Lake	Ap19D396	ok	96.8808	4.11133	0.0224447	0.0312827		0.0089254	1.09881	0.324277	1.35516	148.197	54.3369	3513.07	2.83024e+13		44.5539	1.39377	0.307254	0.0152454		0.950853	0.0557736	0.0224447	0.000702132	0.533321		143.088	4.47619	3507.18	38.3262	913.543	266.239	45879.2
Emerald Lake	Ap19D409	ok	93.9727	4.95183	0.0271949	0.0348103		0.0227211	0.731974	0.295542	0.94102	74.3832	30.5514	2156.82	1.47838e+13		36.7716	1.28003	0.41547	0.0165905		1.55786	0.082527	0.0271949	0.000946664	0.657114		172.968	6.02108	3966.03	29.9129	645.019	257.193	27320
Emerald Lake	Ap19D410	ok	92.3183	4.15785	0.0264888	0.0294767		0.0332965	0.856588	0.33298	1.20233	99.6375	36.8271	2172.39	1.82158e+13		37.7518	1.1128	0.41167	0.0142248		1.50353	0.0682883	0.0264888	0.000780804	0.649003		168.535	4.96787	3952.26	25.9064	741.242	284.558	32337.1
Emerald Lake	AP19E006	ok	94.3535	5.36315	0.0275754	0.035051		0.0375224	0.75235	0.316719	1.02755	75.4619	30.7909	1981.39	1.49966e+13		36.2642	1.2711	0.419764	0.0187032		1.59598	0.0904776	0.0275754	0.000966546	0.618284		175.355	6.14639	3981.43	33.3456	646.813	270.479	26642.2
Emerald Lake	AP19E007	ok	93.1227	3.55368	0.0227619	0.0296435		0.0103439	0.98829	0.312069	1.31072	148.61	48.7268	3465.07	2.55193e+13		43.9331	1.30233	0.335459	0.0118604		1.05281	0.0485749	0.0227619	0.000674741	0.64249		145.087	4.30089	3642.21	27.0509	850.623	266.793	42205.8
Emerald Lake	AP19E021	ok	95.0547	4.12751	0.0249991	0.0302464		0.0361629	0.890789	0.311946	1.22277	115.359	40.0688	2948.12	2.09206e+13		40.0015	1.2099	0.37177	0.0143547		1.28144	0.0628524	0.0249991	0.000756133	0.616668		159.173	4.81442	3798.65	29.2338	751.648	261.224	33986.2
Emerald Lake	AP19E032	ok	91.628	3.6915	0.0221955	0.0305878		0.00446035	1.04154	0.331651	1.42784	166.176	52.317	3634.76	2.74251e+13		45.0542	1.37811	0.3308	0.0131595		1.01235	0.0508008	0.0221955	0.000678911	0.60955		141.517	4.32868	3620.79	30.4817	873.308	275.798	44058.3
Emerald Lake	AP19E033	ok	92.4556	4.4799	0.0273448	0.0292083		0.0138102	0.892914	0.380487	1.26966	104.82	36.6191	2066.26	1.85501e+13		36.5701	1.06815	0.424825	0.0157541		1.60172	0.0756094	0.0273448	0.000798695	0.618752		173.909	5.07958	3999.36	27.7226	744.904	314.791	30680.2
Emerald Lake	Fe06C005	ok	91.6456	2.94386	0.022015	0.0237077		0.0214828	1.38148	0.441095	1.61605	172.727	69.207	2782.25	3.29538e+13		45.4237	1.07689	0.326458	0.0107999		0.990939	0.040331	0.022015	0.000521923	0.582501		140.378	3.32803	3600.53	25.3847	1016.63	319.27	56846.5
Emerald Lake	Fe06C006	ok	92.4896	4.23246	0.0248225	0.0314568		1.37384e-07	0.980454	0.37503	1.26235	99.7868	43.5025	2207.77	2.02788e+13		40.2861	1.26727	0.381315	0.0150122		1.30506	0.0657663	0.0248225	0.000780835	0.624225		158.062	4.97213	3836.99	29.7333	721.962	271.549	35729.5
Emerald Lake	Fe06C027	ok	92.0707	3.4322	0.0220905	0.0281713		0.0187816	0.966569	0.300818	1.33746	155.596	49.3399	3442.91	2.59103e+13		45.2684	1.27527	0.325834	0.0123272		0.992438	0.0468125	0.0220905	0.000622317	0.597238		140.854	3.96805	3597.6	29.036	747.745	227.677	41976.5
Emerald Lake	Fe06C028	ok	89.4373	4.84462	0.0274138	0.0331928		0.0215846	0.727942	0.301473	1.04782	73.8955	30.3593	1883.1	1.3976e+13		36.478	1.21081	0.439714	0.0168672		1.66204	0.0843098	0.0274138	0.000909942	0.654345		174.342	5.7869	4050.78	28.5869	551.779	223.518	25291.2
Emerald Lake	OC02B026	ok	89.0992	5.0551	0.0267407	0.0333906											37.3961	1.24868	0.430912	0.0186011		1.58878	0.0867057	0.0267407	0.00089289	0.611844		170.117	5.68032	4020.61	32.2282	638.606	257.484	28261.8
Emerald Lake	OC02B027	ok	82.4101	6.15	0.0250896	0.0425736											39.8572	1.69686	0.436625	0.0247796		1.51044	0.10716	0.0250896	0.00106815	0.600082		159.742	6.80078	4040.27	42.3211	524.972	228.433	24907
Emerald Lake	OC02B028	ok	88.7235	5.20244	0.0258229	0.0356308											38.7253	1.37982	0.417779	0.0195637		1.48748	0.0875267	0.0258229	0.00092009	0.605532		164.352	5.85599	3974.33	35.0608	611.362	233.192	28207.6
Emerald Lake	OC02B029	ok	87.8728	4.79161	0.0252703	0.033566											39.5721	1.32828	0.412521	0.0182064		1.43734	0.079698	0.0252703	0.000848223	0.605354		160.879	5.40005	3955.35	33.0831	664.209	273.135	31314
Emerald Lake	AU20B010	ok	92.7975	4.42776	0.0266113	0.030681		0.0207054	0.709609	0.28146	0.909054	68.8775	29.2113	2129.09	1.37967e+13		37.5781	1.15293	0.411437	0.0153765		1.50963	0.0729955	0.0266113	0.00081646	0.634518		169.304	5.19443	3951.41	28.0213	697.422	276.93	29732.7
Emerald Lake	AU20B011	ok	81.6298	5.89082	0.0302404	0.0350031		0.00985032	0.57349	0.272671	0.91049	57.8849	20.9503	1393.51	9.23205e+12		33.0684	1.15749	0.510839	0.0206123		2.12997	0.113776	0.0302404	0.00105851	0.655285		192.053	6.72243	4272.8	29.6859	563.483	268.194	21307.9
Emerald Lake	AU20B012	ok	91.1422	3.94417	0.0252159	0.0302824		0.0349077	0.825778	0.313303	1.11962	96.3258	35.938	2580.73	1.74844e+13		39.6576	1.20093	0.39533	0.0133744		1.37447	0.0624068	0.0252159	0.000763597	0.66695		160.536	4.86142	3891.41	25.4614	805.116	305.772	36252.2
Emerald Lake	AU20B013	ok	101.91	4.54197	0.0283242	0.0298425		0.024596	0.838622	0.321589	1.1589	88.1769	32.8165	1977.78	1.78821e+13		35.3055	1.0536	0.397703	0.0143786		1.55317	0.0728117	0.0283242	0.000845263	0.636577		180.051	5.37317	3900.42	27.1944	819.745	314.654	33173
Emerald Lake	AU20B014	ok	92.3875	3.79906	0.0271885	0.0241775		0.021524	0.866046	0.355328	1.15684	81.1096	35.1913	2102.15	1.64139e+13		36.7802	0.889252	0.422683	0.0134189		1.58453	0.0632311	0.0271885	0.00065735	0.605873		172.928	4.18097	3991.8	23.744	845.946	347.402	35531.4
Emerald Lake	MY08A149	ok	90.7566	2.0312	0.0219861	0.0156596		0.0135048	0.934849	0.303729	1.34815	161.001	47.097	3246.38	2.52517e+13		45.4832	0.712247	0.330833	0.00749482		1.0029	0.0276198	0.0219861	0.000344293	0.568614		140.196	2.19541	3620.95	17.3586	2010.03	653.607	115823
Emerald Lake	MY08A150	ok	93.3092	2.64775	0.0284224	0.0172343		0.0337177	0.781461	0.341961	1.13765	78.26	30.4713	1776.58	1.49336e+13		35.1836	0.606364	0.437282	0.00794325		1.71365	0.0429095	0.0284224	0.000489839	0.688277		180.667	3.11366	4042.51	13.5441	1671.74	732.154	74530.3
Emerald Lake	MY08A151	ok	94.5765	2.63265	0.0268599	0.0186369		0.0211663	0.782497	0.316586	1.12568	105.773	32.2534	1884.46	1.76978e+13		37.2302	0.693856	0.407206	0.0079915		1.50807	0.040815	0.0268599	0.000500587	0.688613		170.866	3.18442	3935.9	14.7288	1703.52	689.78	80252.2
Emerald Lake	MY08A152	ok	91.1289	2.32299	0.025331	0.0178454		0.0191039	0.780195	0.310478	1.18661	108.15	34.2228	1911.36	1.78028e+13		39.4773	0.704489	0.397465	0.00698368		1.3882	0.0347656	0.025331	0.000452042	0.712573		161.26	2.87775	3899.52	13.217	1687.03	671.893	84545.6
Emerald Lake	MY08A153	ok	89.5421	2.5871	0.028436	0.0167284		0.0189466	0.736047	0.330665	1.01369	62.3105	28.5809	1661.25	1.26713e+13		35.1667	0.588283	0.45411	0.00782621		1.78045	0.0427626	0.028436	0.000475689	0.696499		180.752	3.0237	4098.72	12.8069	1610.52	724.09	71422
Emerald Lake	MY08A154	ok	91.8361	2.27353	0.0260909	0.0149125		4.74476e-08	0.845633	0.343452	1.11496	84.8773	35.8626	2320.9	1.6784e+13		38.3275	0.571558	0.40728	0.00749667		1.46515	0.0347086	0.0260909	0.00038908	0.6295		166.036	2.47601	3936.17	13.8141	1833.94	745.426	88792.7
Emerald Lake	MY08A155	ok	90.9577	2.7319	0.0281599	0.0166239		0.011434	0.776465	0.338848	1.07845	72.1668	30.4783	1809.51	1.41291e+13		35.5115	0.59034	0.443888	0.00887165		1.72348	0.044804	0.0281599	0.000468129	0.639474		179.022	2.97604	4064.85	14.882	1697.33	741.273	76033.9
Emerald Lake	MY08A156	ok	91.6234	1.94599	0.0229896	0.0149163		0.0134194	0.923788	0.320578	1.19404	124.014	44.431	3273.04	2.20795e+13		43.4979	0.64883	0.348706	0.00657053		1.10533	0.0265634	0.0229896	0.000342921	0.620684		146.523	2.18558	3701.35	14.3586	2041.24	708.887	112000
Emerald Lake	MY08A157	ok	92.5932	2.68923	0.0280684	0.0175072		0.0165685	0.787158	0.337562	1.09597	82.8061	31.0085	1882.53	1.53058e+13		35.6273	0.623735	0.43524	0.0083119		1.68441	0.0436391	0.0280684	0.000491399	0.675753		178.447	3.12412	4035.53	14.2452	1735.52	744.796	77964.5
Emerald Lake	MY08A158	ok	88.3358	3.02428	0.0292831	0.0182767		0.0104271	0.684784	0.317499	1.0315	70.2238	25.9844	1858.76	1.22896e+13		34.1494	0.624138	0.470845	0.00962622		1.90106	0.0521326	0.0292831	0.000535197	0.666474		186.06	3.40055	4152.43	15.1448	1498.83	695.428	64833.8
Emerald Lake	MY08A159	ok	95.9724	2.58658	0.0287052	0.0169498		0.0267783	0.767227	0.328102	1.08496	70.8749	29.6859	1736.35	1.45689e+13		34.8369	0.59048	0.429731	0.00742494		1.70082	0.0411666	0.0287052	0.000486549	0.700293		182.44	3.09232	4016.51	12.903	1703.54	729.024	75111.6
Emerald Lake	MY08A160	ok	94.2758	2.80156	0.0281714	0.0195218		0.0129817	0.798405	0.339063	1.1382	83.5756	31.4703	1891.67	1.57841e+13		35.497	0.692967	0.42927	0.00815478		1.6674	0.045419	0.0281714	0.000549958	0.716678		179.094	3.49624	4014.91	14.1879	1765.76	750.384	79282
Emerald Lake	MY29A015	ok	95.4647	2.57774	0.0261786	0.0176704		0.034488	0.814829	0.313212	1.0756	87.5891	34.5084	2205.97	1.72287e+13		38.1991	0.674994	0.391387	0.008328		1.41271	0.0390739	0.0261786	0.000462587	0.638873		166.587	2.94367	3876.31	16.0295	1794.43	687.763	89126.3
Emerald Lake	MY29A013	ok	91.2561	2.75029	0.0261763	0.0198822		0.0124846	0.76106	0.307914	1.1353	105.553	32.2502	1788.55	1.70564e+13		38.2025	0.759549	0.411507	0.00883054		1.48521	0.0434481	0.0261763	0.000520442	0.679642		166.573	3.31183	3951.66	16.0893	1658.49	669.026	82445.5
Emerald Lake	MY29A012	ok	93.3831	2.66782	0.0262645	0.0205616		0.0149423	0.790912	0.3155	1.18362	109.126	33.7178	1852.24	1.8162e+13		38.0742	0.782866	0.402829	0.00769855		1.45878	0.0409504	0.0262645	0.000540038	0.732468		167.126	3.43638	3919.67	14.3576	1712.23	680.997	85643.7
Emerald Lake	MY29A014	ok	96.3073	3.02528	0.0298121	0.0192606		0.0205829	0.740465	0.322606	1.00994	60.0142	27.565	1661.67	1.31444e+13		33.5435	0.646066	0.444063	0.00880903		1.82531	0.0504689	0.0298121	0.000574197	0.696599		189.372	3.64741	4065.44	14.7706	1601.69	695.788	69937.9
Emerald Lake	MY29A016	ok	93.0009	2.16006	0.0231584	0.017961		0.0239612	0.897912	0.304111	1.22697	128.842	42.8797	3045.95	2.22885e+13		43.181	0.775575	0.344904	0.00645955		1.1013	0.0285779	0.0231584	0.000415948	0.692163		147.586	2.6508	3684.64	14.2879	1978.89	668.295	110815
Emerald Lake	MY29A011	ok	95.6861	2.89716	0.0289752	0.0185115		0.0151287	0.776326	0.335993	1.11371	69.7507	29.8828	1700	1.45037e+13		34.5123	0.638874	0.43492	0.00871489		1.73755	0.0474002	0.0289752	0.000536374	0.678576		184.131	3.40854	4034.43	14.9478	1652.33	712.992	74634.1
Emerald Lake	MY29A010	ok	95.4965	2.57834	0.0275665	0.018086		0.0289208	0.872062	0.359689	1.22027	95.4714	35.3622	1967.95	1.80823e+13		36.276	0.656087	0.41442	0.00745377		1.57515	0.0401772	0.0275665	0.000498566	0.709064		175.3	3.17046	3962.24	13.4765	1836.98	755.401	87422
Emerald Lake	OC30C107	ok	93.9262	2.4337	0.0230317	0.0200837		0.0236364	1.24171	0.41208	1.51566	154.763	61.1524	2639.68	3.00029e+13		43.4185	0.872005	0.337103	0.00759826		1.07051	0.032318	0.0230317	0.000462562	0.665257		146.788	2.94805	3649.69	17.2366	1450.65	486.646	89453.8
Emerald Lake	OC30C127	ok	93.6612	2.26912	0.0221888	0.0196394		0.0123736	1.29456	0.404831	1.54634	168.482	65.6914	2748.01	3.22998e+13		45.0678	0.885103	0.319178	0.00675332		0.976491	0.0281897	0.0221888	0.000435774	0.680307		141.474	2.77847	3565.88	16.275	1494.18	474.117	94986.3
Emerald Lake	OC30C150	ok	94.7355	2.37783	0.0228084	0.0197531		0.0218707	1.23831	0.393383	1.56952	163.594	60.5319	2671.34	3.07168e+13		43.8436	0.866045	0.327654	0.00731886		1.03041	0.0307252	0.0228084	0.000450535	0.662447		145.38	2.87171	3606.14	17.1332	1429.63	462.838	87601.7
Emerald Lake	OC30C173	ok	102.692	3.55544	0.0298833	0.0229629		0.0276857	0.746447	0.304862	1.02291	63.6959	28.1712	1657.11	1.45179e+13		33.4635	0.768419	0.418178	0.0102493		1.72302	0.057869	0.0298833	0.000686206	0.683709		189.818	4.35876	3975.76	18.3489	864.441	361.372	40920.4
Emerald Lake	OC30C174	ok	94.8485	2.65847	0.0251017	0.0207687		0.0276846	1.00308	0.369483	1.22179	100.628	45.1107	2184.41	2.13599e+13		39.8379	0.827382	0.374755	0.00797823		1.29704	0.038576	0.0251017	0.000521329	0.698303		159.818	3.31922	3810.75	16.1057	1162.12	438.233	65554.6
Emerald Lake	JA05B249	ok	88.7497	2.14221	0.0244539	0.0169674		0.0136046	1.1739	0.454949	1.56354	133.09	54.2525	2757.96	2.48532e+13		40.8933	0.693851	0.393404	0.00653193		1.32644	0.0314893	0.0244539	0.000414918	0.714727		155.743	2.64255	3884.06	25.0037	2177.1	853.998	128297
Emerald Lake	JA05B272	ok	93.6782	2.43839	0.0263874	0.0184359		0.0101083	1.05429	0.417481	1.38191	100.402	45.5781	2218.23	2.12214e+13		37.8969	0.698664	0.403516	0.00691117		1.46811	0.0369435	0.0263874	0.000486474	0.732628		167.898	3.09535	3922.23	25.7304	2192.41	878.955	122064
Emerald Lake	JA05B294	ok	97.5144	2.73564	0.0281529	0.0205109		0.0140901	0.904376	0.36968	1.24777	87.6861	36.5252	1843	1.82517e+13		35.5203	0.728553	0.414549	0.00700596		1.60917	0.0427661	0.0281529	0.000577443	0.771767		178.978	3.671	3962.7	25.3251	1933.56	800.393	101360
Emerald Lake	JA05B316	ok	89.1594	2.31229	0.0255106	0.0164709		0.0301301	0.884303	0.357173	1.25357	109.219	38.6611	1988.88	1.87826e+13		39.1994	0.645649	0.410331	0.00753803		1.4433	0.0356108	0.0255106	0.000420182	0.667561		162.389	2.67469	3947.37	27.5547	2061.56	843.381	117755

## Sheet: Kovdor
			207 cor 206Pb/238U		206Pb/238U			Pb204	Pb206	Pb207	Pb208	Th232	U238	140Ce	Radiation dose		Data for Tera-Wasserburg plot						Data for Wetherill plot					206Pb/238U		207Pb/206Pb		Pb206	Pb207	U238
	File ID	Comment	age	+/-1 ster	ratio	+/-1 RSE		ppm	ppm	ppm	ppm	ppm	ppm	ppm	decays / mg		238U/206Pb	1 std. error	207Pb/206Pb	1 std. error		207Pb/235U	1 std. error	206Pb/238U	1 std. error	Rho		age	+/-1 std err	age	+/-1 ster	raw cps	raw cps	raw cps
Kovdor	MY15B111	line at 3um/sec	370.936	7.12677	0.0820654	0.0172064		0.0187704	1.39261	0.391443	34.9696	1895.16	19.4753	6174.27	5.70751e+14		12.1854	0.209667	0.281165	0.00472443		3.18143	0.0765133	0.0820654	0.00141205	0.715442		508.439	8.74839	3369.41	13.1115	4359.25	1227.55	73757.3
Kovdor	MY15B099	line at 3um/sec	377.809	7.38979	0.084887	0.0167886		0.0279176	1.19915	0.348082	32.3729	1758.45	16.1459	5978.39	5.3705e+14		11.7804	0.197776	0.290357	0.00552213		3.3984	0.0862121	0.084887	0.00142513	0.661791		525.227	8.81783	3419.52	14.7847	3736.99	1087.16	61124.2
Kovdor	MY15B107	line at 3um/sec	377.445	6.65035	0.0849142	0.0147897		0.0212448	1.24365	0.353656	31.272	1710.34	16.9473	5861.39	5.23425e+14		11.7766	0.174172	0.291117	0.00513755		3.40839	0.07848	0.0849142	0.00125585	0.642315		525.388	7.77032	3423.58	13.715	3908.41	1113.6	64525
Kovdor	MY15B098	line at 3um/sec	374.285	7.55358	0.0884281	0.0161916		0.0147984	1.17342	0.367955	30.5347	1657.38	15.2773	5777.15	5.01488e+14		11.3086	0.183105	0.319433	0.00621418		3.89468	0.0985759	0.0884281	0.00143179	0.63972		546.234	8.84441	3567.11	14.9625	3628.35	1140.33	57405.5
Kovdor	MY15B106	line at 3um/sec	378.044	9.98486	0.0935285	0.0206672		0.0146954	1.15551	0.384707	29.5055	1583.92	14.4844	5778.43	4.83977e+14		10.6919	0.220972	0.345063	0.00841695		4.44983	0.142264	0.0935285	0.00193297	0.646442		576.371	11.912	3685.34	18.608	3546.71	1183.16	53880
Kovdor	MY15B110	line at 3um/sec	386.285	9.68988	0.0960749	0.01816		0.0353104	1.09486	0.377785	28.7399	1556.83	13.0835	5645.27	4.84682e+14		10.4085	0.189019	0.348052	0.00880688		4.61058	0.143599	0.0960749	0.00174472	0.58307		591.365	10.7392	3698.49	19.2856	3418.32	1181.68	49437.9
Kovdor	AP24C101	4 J/cm2	368.681	7.80331	0.0707918	0.0200657		0.0131204	1.64998	0.307347	38.4966	2247.43	25.263	6895.79	6.75367e+14		14.1259	0.283447	0.190739	0.00502063		1.86176	0.0616206	0.0707918	0.00142049	0.606251		440.924	8.84745	2748.54	21.6323	2117.57	384.976	30471.6
Kovdor	AP24C100	4 J/cm2	363.15	9.60617	0.0780992	0.0231241		0.0332906	1.0775	0.27214	36.9407	2175.13	14.9888	7004.71	6.32205e+14		12.8042	0.296086	0.264025	0.00792764		2.8431	0.107749	0.0780992	0.00180597	0.61016		484.767	11.2098	3270.88	23.6069	1438.54	354.815	18862.9
Kovdor	AP24C099	4 J/cm2	382.364	11.8311	0.0972085	0.0241227		0.0152963	0.885159	0.308758	29.1815	1686.89	9.88967	7212.26	5.14273e+14		10.2872	0.248154	0.3598	0.00981482		4.82244	0.175607	0.0972085	0.00234493	0.662445		598.029	14.426	3749.01	20.7208	1125.91	383.767	11892.9
Kovdor	AP24C070	Flow Restrictor	370.688	8.71416	0.0741527	0.0210506		1.15521e-07	1.49524	0.319882	34.2764	2043.46	22.1955	6329.91	6.16484e+14		13.4857	0.283882	0.218045	0.00710845		2.22933	0.0865125	0.0741527	0.00156096	0.54245		461.126	9.70698	2966.31	26.2782	1293.09	271.721	18849.3
Kovdor	AP24C069	Flow Restrictor	380.483	10.812	0.0806764	0.0239613		0.0214943	1.24181	0.300592	36.7017	2170.41	16.9323	7122.02	6.63777e+14		12.3952	0.297005	0.255161	0.00966922		2.83832	0.127255	0.0806764	0.00193311	0.534437		500.159	11.9845	3217.07	29.9194	1048.67	249.37	14046.3
Kovdor	AP24C071	Flow Restrictor	367.416	16.8691	0.0877041	0.0395067		0.0155751	0.974868	0.301356	31.4086	1914.34	12.4851	5632.03	5.62133e+14		11.402	0.450454	0.325188	0.0132719		3.93238	0.223368	0.0877041	0.0034649	0.695513		541.945	21.4105	3594.54	31.3301	876.54	266.107	11020.1
Kovdor	AP24C068	Flow Restrictor	367.253	15.1987	0.0951865	0.0307485		0.041375	0.868777	0.300526	26.6823	1541.5	10.0792	6761.9	4.52482e+14		10.5057	0.323034	0.369722	0.014071		4.85234	0.237413	0.0951865	0.00292684	0.628448		586.138	18.0228	3790.28	28.8305	738.718	251.075	8421.86
Kovdor	MA01G016	Flow Restrictor	398.611	8.17674	0.0729136	0.0196695		0.0151037	2.50282	0.387337	43.677	2631.58	40.0071	8821.6	8.69725e+14		13.7149	0.269764	0.156277	0.00487623		1.5711	0.0579496	0.0729136	0.00143417	0.533268		453.685	8.92374	2415.77	26.4857	2141.49	333.005	41042.7
Kovdor	MA01G014	Flow Restrictor	391.59	8.26216	0.0723251	0.0201465		0.019859	2.19054	0.350773	46.0561	2766.05	35.2634	8791.17	8.88931e+14		13.8265	0.278555	0.163314	0.00510164		1.6286	0.0605372	0.0723251	0.0014571	0.541992		450.149	9.06894	2490.27	26.317	1836.99	295.597	35454.3
Kovdor	MA01G013	Flow Restrictor	398.493	8.91505	0.0738781	0.0211469		0.0273509	1.88005	0.307887	42.5212	2554.99	29.9381	7627.42	832207180865116		13.5358	0.286241	0.165818	0.00582135		1.68907	0.0692248	0.0738781	0.00156229	0.51598		459.478	9.71653	2515.86	29.5011	1577.06	259.543	30107.9
Kovdor	MA01G015	Flow Restrictor	403.017	9.2696	0.0775043	0.0216438		0.022054	1.81226	0.3462	42.8796	2597.87	27.2504	7920.13	8.5156e+14		12.9025	0.27926	0.191143	0.00587447		2.04261	0.0767815	0.0775043	0.00167749	0.57579		481.209	10.4152	2752.03	25.2496	1544.77	296.529	27849.4
Kovdor	MA01G012	Flow Restrictor	401.264	10.9728	0.0806269	0.0249702		0.020391	1.46073	0.312052	39.5344	2397.96	21.4642	8162.31	777585993020380		12.4028	0.309701	0.220535	0.00778439		2.45166	0.106002	0.0806269	0.00201327	0.577519		499.863	12.4817	2984.6	28.4074	1213.12	260.448	21370.5
Kovdor	Ma01B014	No N2	378.547	9.8993	0.0695732	0.0249944		0.0110229	2.10238	0.325225	44.8225	2669.72	33.5096	7863.81	828418346133799		14.3733	0.359253	0.160141	0.0063473		1.53619	0.0719835	0.0695732	0.00173894	0.533402		433.584	10.8372	2457.15	33.5029	1360.33	211.173	27168.8
Kovdor	Ma01B004	No N2	373.172	9.97187	0.0725178	0.0246796		0.00720965	1.84433	0.360531	44.2272	2643.17	28.7125	7827.9	802814505503223		13.7897	0.340325	0.198762	0.00743449		1.98738	0.0890588	0.0725178	0.00178971	0.550733		451.307	11.1381	2816.06	30.5512	1171.91	229.24	22858.2
Kovdor	Ma01B023	No N2	374.067	11.0022	0.0728319	0.0273539		0.00850114	1.86849	0.356552	40.5775	2415.68	28.325	7145.82	7.38117e+14		13.7303	0.375576	0.200041	0.00792356		2.00883	0.0966986	0.0728319	0.00199223	0.568252		453.194	12.3966	2826.53	32.3223	1178.56	226.253	22389.4
Kovdor	Ma01B019	No N2	377.006	10.2496	0.0738943	0.0246483		0.0380498	1.99652	0.400632	42.9368	2556.16	29.6708	7715.9	786859986826647		13.5328	0.333561	0.204453	0.00814411		2.08308	0.0975776	0.0738943	0.00182137	0.52619		459.575	11.3277	2862.08	32.402	1263.87	254.858	23536.8
Kovdor	Ma01B005	No N2	371.089	12.2451	0.0762499	0.0299949		0.0294322	1.50751	0.337683	42.4847	2556.37	22.3327	7305.49	7.65295e+14		13.1148	0.393377	0.235398	0.0093068		2.47481	0.122817	0.0762499	0.00228711	0.604409		473.7	14.2086	3089.12	31.5406	955.778	214.3	17740.2
Kovdor	SE24A142	ok	388.725	7.91933	0.0734678	0.0196598		0.013262	0.888939	0.158037	22.6793	1282.99	12.212	5133.01	4.03848e+14		13.6114	0.267598	0.179479	0.00430815		1.81807	0.0564096	0.0734678	0.00144436	0.633632		457.014	8.98482	2648.06	19.9135	1794.26	313.061	22298
Kovdor	SE24A156	ok	373.85	6.97846	0.0707318	0.0178202		0.00688448	0.997071	0.176923	23.7263	1333.92	14.1914	4991.26	4.05523e+14		14.1379	0.25194	0.180522	0.00425011		1.76054	0.0519837	0.0707318	0.00126045	0.603519		440.563	7.85092	2657.67	19.5138	2044.67	355.002	25862.3
Kovdor	SE24A149	ok	370.015	7.40062	0.0700577	0.0191174		0.00263858	0.826142	0.146052	22.021	1248.86	11.8321	4552.3	3.73921e+14		14.274	0.272881	0.181107	0.00453105		1.74942	0.0550831	0.0700577	0.00133932	0.60716		436.503	8.3448	2663.04	20.726	1716.03	297.292	22037.1
Kovdor	SE24A162	ok	381.033	7.57523	0.0734236	0.0188648		0.00024191	0.838886	0.159184	24.3687	1362.05	11.4627	4462.16	4.18235e+14		13.6196	0.256932	0.192919	0.00465404		1.95305	0.0598112	0.0734236	0.00138512	0.616004		456.749	8.6165	2767.21	19.7922	1745.63	323.697	21034.3
Kovdor	SE24A144	ok	383.975	7.89978	0.0755882	0.0192364		0.00553952	0.783588	0.158474	20.9172	1160.6	10.3796	3984.43	3.59948e+14		13.2296	0.25449	0.207241	0.00516028		2.15989	0.0679608	0.0755882	0.00145405	0.61136		469.735	9.03603	2884.09	20.2149	1601.31	317.699	19139.9
Kovdor	SE24A167	ok	363.047	7.26114	0.0722532	0.0185117		0.0156957	0.7666	0.162017	20.0586	1133.55	10.6889	4158.16	3.32879e+14		13.8402	0.256206	0.214793	0.0051455		2.13982	0.0647825	0.0722532	0.00133753	0.611459		449.716	8.32502	2942.06	19.35	1620.95	334.411	19802.1
Kovdor	SE24A158	ok	367.168	7.79824	0.0735103	0.0192421		0.00443225	0.776737	0.168249	21.155	1196.81	10.6062	3983.55	3.5465e+14		13.6035	0.26176	0.218644	0.00605736		2.21609	0.074751	0.0735103	0.00141449	0.570458		457.27	8.79883	2970.73	22.3226	1612.24	341.564	19514
Kovdor	SE24A143	ok	374.068	8.5153	0.0754929	0.0212436		4.96701e-08	0.687543	0.150924	18.1577	1025.28	9.15142	3638.27	309670591676185		13.2463	0.281399	0.223767	0.00559312		2.32918	0.0764049	0.0754929	0.00160375	0.647607		469.164	9.96676	3008	20.076	1397.79	301.068	16809.3
Kovdor	SE24A159	ok	370.55	9.5175	0.075626	0.0237568		0.0128332	0.583605	0.131091	19.7682	1105.82	7.70794	3777.5	3.28133e+14		13.223	0.314136	0.231065	0.00660624		2.40939	0.089563	0.075626	0.00179663	0.639096		469.962	11.1648	3059.44	22.8645	1202.71	264.17	14062.2
Kovdor	SE24A148	ok	366.517	8.83078	0.0754012	0.0220806		4.93526e-08	0.600369	0.139221	17.8269	1006.42	8.01179	3721.51	2.96581e+14		13.2624	0.292841	0.236218	0.00635501		2.4558	0.0854721	0.0754012	0.0016649	0.634423		468.614	10.3473	3094.67	21.4524	1228.34	279.192	14716.5
Kovdor	SE24A157	ok	368.262	8.9803	0.0763321	0.0222113		0.00324203	0.614829	0.144113	19.4086	1096.65	8.0607	3808.48	3.23896e+14		13.1006	0.290983	0.240987	0.00655926		2.53631	0.0891028	0.0763321	0.00169544	0.632245		474.192	10.5324	3126.5	21.6471	1264.69	289.996	14716
Kovdor	SE24A165	ok	384.35	9.3153	0.0801171	0.0222294		0.00284835	0.612875	0.145244	18.7015	1046.3	7.71326	3855.7	3.22695e+14		12.4817	0.277461	0.244406	0.00629887		2.69984	0.0918878	0.0801171	0.00178095	0.653141		496.822	11.044	3148.89	20.4597	1278.69	295.936	14136.3
Kovdor	SE24A145	ok	367.626	7.78932	0.0768469	0.0194447		0.00683477	0.813096	0.200833	21.3346	1157.99	10.4285	4151.14	3.43783e+14		13.0129	0.253031	0.246335	0.00530086		2.61008	0.0756995	0.0768469	0.00149426	0.670443		477.275	9.28045	3161.36	17.0659	1574.32	381.387	18196.9
Kovdor	SE24A166	ok	368.077	7.91126	0.0773879	0.0193996		0.0122969	0.781442	0.192199	25.0715	1409.28	10.1263	4211.93	4.15735e+14		12.9219	0.250679	0.249966	0.00577622		2.6672	0.0804736	0.0773879	0.00150129	0.642975		480.513	9.32173	3184.55	18.2921	1632.49	392.029	18558.5
Kovdor	SE24A164	ok	380.789	11.7848	0.0836699	0.027784		0.00373726	0.55033	0.151468	19.4182	1058.47	6.42065	3337.77	3.21624e+14		11.9517	0.332067	0.277019	0.0084155		3.1958	0.131566	0.0836699	0.00232469	0.67489		517.991	14.3919	3346.21	23.7463	1047.38	281.58	10748
Kovdor	SE24A160	ok	360.649	13.7346	0.0901124	0.0295771		0.00585591	0.287372	0.0950067	3.51756	184.314	3.20025	2911.99	5.55339e+13		11.0973	0.328225	0.350193	0.01261		4.35105	0.202753	0.0901124	0.00266527	0.634722		556.202	16.4509	3707.84	27.4277	593.92	191.962	5847.63
Kovdor	SE24A163	ok	384.272	17.3502	0.103659	0.0337704		4.87602e-08	0.248856	0.0928542	15.757	880.641	2.40569	3777.91	2.66268e+14		9.647	0.325783	0.390676	0.0147261		5.58374	0.282587	0.103659	0.00350061	0.667281		635.818	21.4718	3873.57	28.401	515.241	187.828	4386.66
Kovdor	SE24A161	ok	391.222	14.9987	0.111063	0.0277206		0.00106274	0.382977	0.154612	16.9704	947.674	3.50184	2767.55	2.92972e+14		9.00393	0.249594	0.416297	0.0120904		6.37489	0.255943	0.111063	0.00307873	0.69045		678.916	18.82	3969.01	21.7519	789.307	311.457	6372.69
Kovdor	SE24A132	ok	373.771	6.3408	0.0669585	0.0166395		0.00143554	1.458	0.207114	28.8806	1641.35	21.9302	6288.7	5.04487e+14		14.9346	0.248505	0.141905	0.0031649		1.3101	0.0364551	0.0669585	0.00111416	0.597982		417.806	6.9521	2250.58	19.2624	2966.85	414.51	40876.4
Kovdor	SE24A138	ok	378.832	5.73731	0.0695606	0.014577		0.00955041	1.3603	0.213403	30.229	1721.5	19.661	6337.87	5.32112e+14		14.376	0.209559	0.159472	0.00330964		1.5295	0.0387904	0.0695606	0.00101399	0.57477		433.508	6.31925	2450.07	17.555	2752.57	424.163	36170.3
Kovdor	SE24A131	ok	379.398	5.96303	0.0703127	0.0151542		0.00559061	1.39311	0.229329	31.9435	1822.83	20.0333	6843.98	5.63284e+14		14.2222	0.215526	0.166002	0.00333047		1.60934	0.0404636	0.0703127	0.00106554	0.602722		438.039	6.63815	2517.73	16.8561	2798.02	453.113	36901.9
Kovdor	SE24A140	ok	374.325	6.41174	0.0693942	0.0163601		0.0126916	0.890394	0.146059	21.5902	1227.13	12.8848	5270.96	3.73321e+14		14.4104	0.235757	0.166337	0.0039886		1.59153	0.0461994	0.0693942	0.0011353	0.563591		432.505	7.07583	2521.12	20.1395	1808.83	291.332	23738.4
Kovdor	SE24A116	ok	368.059	6.2945	0.0683765	0.0166454		0.00528106	1.32721	0.220917	29.1918	1752.07	19.7415	6383.66	5.25667e+14		14.6249	0.243438	0.167958	0.00326057		1.58346	0.0404926	0.0683765	0.00113816	0.65092		426.367	7.09707	2537.39	16.2785	2592.22	425.827	36019.9
Kovdor	SE24A117	ok	370.634	6.78292	0.0688925	0.0175872		5.03273e-08	0.988435	0.165255	26.062	1500.82	14.5783	5530.12	4.50566e+14		14.5154	0.255285	0.168283	0.00404374		1.5985	0.0476001	0.0688925	0.00121163	0.590614		429.48	7.55336	2540.64	20.143	1983.92	327.273	27301.3
Kovdor	SE24A134	ok	371.788	7.5586	0.0711616	0.019364		5.02022e-08	0.876277	0.160324	21.5112	1189.61	12.4343	5055.13	3.59358e+14		14.0525	0.272114	0.188514	0.00466622		1.84965	0.058129	0.0711616	0.00137797	0.616157		443.15	8.58117	2729.24	20.3789	1762.81	317.078	22855.9
Kovdor	SE24A135	ok	370.182	7.31297	0.0710176	0.0186187		0.0157114	0.653837	0.121534	18.4334	1051.66	9.22637	5133.68	3.14105e+14		14.081	0.262171	0.190113	0.00485474		1.86157	0.0588311	0.0710176	0.00132226	0.589145		442.283	8.23476	2743.14	20.9969	1332.58	243.461	17160.3
Kovdor	SE24A124	ok	384.519	7.22266	0.0739545	0.0178722		0.0036781	0.944525	0.17836	22.7739	1280.05	12.9457	4503.18	3.995e+14		13.5218	0.241665	0.191559	0.00429504		1.9533	0.0560068	0.0739545	0.00132173	0.623313		459.936	8.22008	2755.59	18.4147	1920.7	357.334	24353
Kovdor	SE24A123	ok	390.763	7.07461	0.0756814	0.0172282		0.0203175	0.934527	0.183559	24.0551	1359.22	12.577	4918.81	4.29636e+14		13.2133	0.227641	0.196182	0.00407122		2.04715	0.0552149	0.0756814	0.00130385	0.638752		470.294	8.10231	2794.69	16.9831	1884.56	364.768	23491.5
Kovdor	SE24A136	ok	399.841	10.728	0.0777724	0.0255444		0.00542324	0.713564	0.140364	30.1899	1672.47	8.93063	6471.09	5.32255e+14		12.858	0.328451	0.198921	0.00629831		2.13308	0.086778	0.0777724	0.00198665	0.627905		482.813	12.3332	2817.37	25.8584	1316.92	254.565	15022.3
Kovdor	SE24A120	ok	384.761	9.50635	0.0778284	0.0229398		0.015162	0.607171	0.132477	25.9517	1484.74	7.93578	5151.14	4.54517e+14		12.8488	0.294748	0.225113	0.00632508		2.41568	0.0876229	0.0778284	0.00178537	0.632429		483.147	11.0833	3017.63	22.5492	1230.89	264.819	14955.7
Kovdor	SE24A139	ok	373.101	9.42615	0.0758612	0.0234058		0.0117884	0.577464	0.129001	12.5919	707.106	7.63833	4475.43	2.14675e+14		13.182	0.308534	0.228613	0.00647439		2.39124	0.0878553	0.0758612	0.00177559	0.637056		471.371	11.0328	3042.37	22.6808	1182.33	259.383	14200.8
Kovdor	SE24A141	ok	375.347	9.29198	0.0783702	0.0221467		0.013443	0.564646	0.135228	22.9834	1301.9	7.2462	4473.38	3.8906e+14		12.76	0.282591	0.245536	0.00712784		2.65318	0.0968757	0.0783702	0.00173564	0.606543		486.387	10.7719	3156.21	23.0321	1134.28	266.662	13184.5
Kovdor	SE24A122	ok	375.27	9.50872	0.0786191	0.0230476		0.000855543	0.511339	0.123605	17.7675	999.902	6.59583	4805.45	3.00048e+14		12.7195	0.293155	0.247665	0.00680349		2.68469	0.0962686	0.0786191	0.00181198	0.64274		487.875	11.2443	3169.9	21.771	1040.29	247.856	12444.1
Kovdor	SE24A119	ok	390.918	11.0585	0.0854891	0.0246713		4.99982e-08	0.451354	0.119523	15.4446	874.455	5.37956	5083.92	2.7295e+14		11.6974	0.288591	0.274114	0.00849713		3.23105	0.128008	0.0854891	0.00210913	0.622731		528.804	13.0463	3329.72	24.2612	911.869	238.155	10115.9
Kovdor	SE24A137	ok	367.407	12.1559	0.0808874	0.029368		0.0137478	0.396975	0.105827	12.0567	669.932	4.97154	4570.39	1.97459e+14		12.3629	0.363072	0.278233	0.00936045		3.10307	0.138575	0.0808874	0.0023755	0.657627		501.417	14.7256	3353.04	26.2838	808.201	211.678	9213.71
Kovdor	SE24A133	ok	385.317	14.8569	0.0978271	0.0310359		4.97436e-08	0.328528	0.111646	19.2099	1083.85	3.42629	3671.62	3.29213e+14		10.2221	0.317252	0.359127	0.0119167		4.84406	0.220087	0.0978271	0.00303615	0.68309		601.662	18.6731	3746.17	25.2101	667.002	222.892	6364.01
Kovdor	SE24A118	ok	401.671	16.8198	0.111675	0.0303467		0.0147505	0.350302	0.135814	26.3292	1507.82	3.23333	5702.07	4.75554e+14		8.95457	0.271742	0.406329	0.0136852		6.25653	0.283641	0.111675	0.00338896	0.669386		682.467	20.7106	3932.66	25.2822	705.864	269.967	6071.55
Kovdor	SE24A071	ok	542.071	40.1659	0.292155	0.0331359		0.0198174	0.321162	0.212808	0.951851	24.5557	1.1938	594.326	1.26025e+13		3.42284	0.113419	0.694397	0.0173332		27.9719	1.16044	0.292155	0.00968083	0.798731		1652.29	54.7502	4719.17	17.9441	676.561	446.659	2477.66
Kovdor	SE24A089	ok	557.991	50.4567	0.339217	0.0333326		4.76028e-08	0.30012	0.211638	0.880778	20.9776	0.940234	684.064	1.09371e+13		2.94796	0.0982632	0.741925	0.0202503		34.7008	1.49497	0.339217	0.011307	0.773705		1882.9	62.762	4814.14	19.533	637.082	445.917	1925.66
Kovdor	SE24A068	ok	545.742	52.6202	0.334923	0.0377164		0.0138315	0.286876	0.20178	0.8568	21.1075	0.943967	712.251	1.07544e+13		2.98576	0.112612	0.742871	0.0212174		34.3052	1.62299	0.334923	0.0126321	0.79721		1862.2	70.2354	4815.96	20.438	604.837	424.134	1967.54
Kovdor	SE24A074	ok	494.143	54.2469	0.317007	0.0356672		0.0203721	0.274057	0.191274	0.866319	23.2933	0.938094	1061	1.05512e+13		3.15451	0.112512	0.747592	0.0235755		32.6764	1.55569	0.317007	0.0113067	0.749169		1775.09	63.3127	4825.02	22.5565	581.443	404.069	1954.07
Kovdor	SE24A070	ok	608.297	63.5212	0.375877	0.0392931		0.0302474	0.305395	0.217281	0.882021	20.8338	0.890421	743.667	1.1773e+13		2.66044	0.104537	0.758515	0.0238791		39.3108	1.97926	0.375877	0.0147694	0.780415		2057	80.8257	4845.77	22.4964	641.557	454.876	1844.99
Kovdor	SE24A085	ok	-16689.8	7537.81	1.2653	0.0532178		0.0304614	0.246513	0.189368	0.554567	5.27053	0.228163	202.888	-5.03905e+13		0.790329	0.0420595	0.809314	0.0210641		141.192	8.36442	1.2653	0.0673362	0.898321		5271.27	280.525	4938.22	18.5208	519.564	396.49	466.149
Kovdor	SE24A072	ok	0	828.792	1.2789	0.0571132		0.0149869	0.241206	0.185434	0.551575	5.32387	0.22235	201.304	0		0.781923	0.0446581	0.822519	0.0245915		145.039	9.34998	1.2789	0.073042	0.88595		5309.86	303.263	4961.24	21.2534	510.621	391.034	463.208
Kovdor	SE24A069	ok	-4105.26	818.074	1.23129	0.0620284		0.00383053	0.230136	0.182218	0.55959	4.86233	0.229118	189.348	-1.61104e+13		0.812159	0.0503769	0.852588	0.0272461		144.744	10.0997	1.23129	0.0763747	0.888958		5173.75	320.919	5012.23	22.6662	486.293	383.791	478.076
Kovdor	SE24A075	ok	#NUM!	#VALUE!	2.46535	0.0806096		0.0314107	0.266882	0.217743	0.750528	13.5671	0.142495	1511.25	#NUM!		0.405622	0.032697	0.853879	0.0237263		290.252	24.7482	2.46535	0.198731	0.945409		8011.69	645.819	5014.37	19.7064	560.411	455.168	293.434
Kovdor	SE24A076	ok	6592.02	202.751	1.84334	0.0566906		0.0189956	0.259509	0.212064	0.585819	5.2225	0.170657	207.544	5.19821e+13		0.542493	0.0307543	0.8581	0.0215645		218.095	13.5243	1.84334	0.1045	0.914202		6736.38	381.889	5021.37	17.8173	550.159	447.458	354.392
Kovdor	SE24A084	ok	5221.9	80.6577	1.38176	0.0621275		0.0131974	0.233331	0.191698	0.550401	5.10822	0.205553	197.211	3.31124e+13		0.723712	0.0449624	0.860937	0.0244187		164.024	11.2021	1.38176	0.0858455	0.909686		5594.47	347.57	5026.05	20.1049	483.487	394.683	413.354
Kovdor	SE24A065	ok	5296.98	82.0642	1.41815	0.0551585		0.0195623	0.257872	0.207047	0.601304	4.81885	0.216832	188.223	3.31589e+13		0.705146	0.0388948	0.864651	0.0249808		169.068	10.5274	1.41815	0.0782228	0.885841		5692.19	313.973	5032.15	20.4739	551.355	441.621	459.898
Kovdor	SE24A042	ok	700.668	83.6636	0.410957	0.0761572		0.0202837	0.438054	0.320902	0.973029	13.082	1.24422	2961.79	1.02112e+13		2.43334	0.185317	0.756306	0.0251118		42.8544	3.56037	0.410957	0.0312974	0.916668		2219.3	169.015	4841.6	23.7313	841.998	618.301	2434.62
Kovdor	SE24A040	ok	1642.09	161.977	1.0418	0.0477675		0.00253139	0.263739	0.197125	0.603847	6.45059	0.306654	221.545	1.04451e+13		0.959873	0.0458507	0.798387	0.0233573		114.684	6.42393	1.0418	0.0497643	0.85277		4601.67	219.81	4918.86	20.8363	549.704	412.024	652.105
Kovdor	SE24A041	ok	1176.58	172.553	1.10589	0.0443886		0.0170664	0.26063	0.198979	0.591892	6.39347	0.282639	219.182	7.18191e+12		0.904247	0.0401383	0.81045	0.0221595		123.578	6.44259	1.10589	0.049089	0.851435		4800.9	213.105	4940.21	19.4549	540.594	413.799	597.465
Kovdor	SE24A048	ok	-2261.46	496.266	1.22112	0.0528744		0.0200427	0.251841	0.189656	0.573175	5.48342	0.250283	205.955	-1.05522e+13		0.818923	0.0433001	0.814927	0.0248899		137.207	8.37812	1.22112	0.0645658	0.865916		5144.3	272.002	4948.05	21.7244	521.79	393.4	524.384
Kovdor	SE24A049	ok	1159.17	94.9116	0.660848	0.0394384		0.0036858	0.249646	0.192177	0.56572	5.23551	0.4354	204.831	6.65266e+12		1.51321	0.0596785	0.820469	0.0230029		74.7593	3.61747	0.660848	0.0260628	0.815041		3270.45	128.981	4957.69	19.9333	517.066	398.412	910.903
Kovdor	SE24A060	ok	5120.77	63.8098	1.34863	0.0555393		0.029184	0.261279	0.202999	0.608119	5.81992	0.237202	214.961	3.66178e+13		0.741492	0.0411819	0.82312	0.0219522		153.059	9.43005	1.34863	0.0749021	0.901455		5504.16	305.697	4962.28	18.9577	528.158	409.793	478.365
Kovdor	SE24A059	ok	0	672.867	1.26988	0.0577299		0.0353391	0.254495	0.197342	0.597315	5.55928	0.243885	207.924	0		0.787473	0.0454607	0.827371	0.022672		144.866	9.2574	1.26988	0.0733103	0.903394		5284.31	305.063	4969.6	19.4723	513.947	398.07	491.923
Kovdor	SE24A051	ok	0	945.81	1.28529	0.0559077		0.0257723	0.251734	0.195679	0.555726	5.68299	0.239359	203.047	0		0.778036	0.0434982	0.830625	0.0240998		147.2	9.27181	1.28529	0.0718575	0.887593		5327.91	297.871	4975.18	20.6124	520.697	404.965	498.98
Kovdor	SE24A038	ok	-738.828	299.593	1.18791	0.0524233		0.0131248	0.270725	0.212422	0.639334	5.9753	0.279194	210.739	-3.96463e+12		0.841815	0.0441307	0.840914	0.0234634		137.732	8.17942	1.18791	0.0622741	0.88275		5047.2	264.59	4992.66	19.8073	564.958	444.729	595.759
Kovdor	SE24A061	ok	597.115	207.961	1.13291	0.0528146		0.0048493	0.24727	0.197126	0.576095	5.83717	0.259164	208.683	3.25644e+12		0.882685	0.0466186	0.844187	0.0243591		131.866	7.93613	1.13291	0.059834	0.877566		4883.07	257.897	4998.18	20.4787	500.226	398.159	522.465
Kovdor	SE24A063	ok	5974.84	161.662	1.66921	0.0615642		0.0119594	0.233371	0.185698	0.538546	4.22208	0.171958	194.647	3.58381e+13		0.599084	0.0368822	0.848084	0.0257805		195.187	13.4016	1.66921	0.102764	0.896651		6328.99	389.639	5004.71	21.5679	484.559	384.808	354.996
Kovdor	SE24A044	ok	1478.22	128.033	0.898485	0.0456777		0.0309533	0.261299	0.21106	0.608345	7.02799	0.345582	235.062	1.02365e+13		1.11299	0.0508387	0.855153	0.0230956		105.939	5.62162	0.898485	0.0410407	0.860793		4132.51	188.764	5016.49	19.1521	543.103	439.556	729.596
Kovdor	SE24A047	ok	-3055.49	564.691	1.22042	0.0462496		0.012331	0.272187	0.222478	0.639258	5.96673	0.268492	213.542	-1.51007e+13		0.819392	0.0378965	0.862246	0.0247217		145.091	7.89523	1.22042	0.0564438	0.849931		5142.27	237.828	5028.2	20.3216	583.128	477.282	582.319
Kovdor	SE24A050	ok	5911.57	180.872	1.64771	0.0716235		0.0151073	0.222448	0.179364	0.508264	4.51983	0.173783	204.341	3.67036e+13		0.606901	0.0434684	0.865576	0.0283592		196.648	15.4883	1.64771	0.118015	0.909372		6276.85	449.57	5033.67	23.2165	464.418	374.744	366.069
Kovdor	SE24A037	ok	904.688	205.674	1.0899	0.0664505		0.00761519	0.224984	0.182916	0.536222	5.99657	0.258573	211.14	5.10359e+12		0.917511	0.0609691	0.871384	0.0278712		130.948	9.65712	1.0899	0.0724248	0.901053		4751.77	315.758	5043.14	22.6556	463.369	378.027	545.146
Kovdor	SE24A045	ok	1313.05	155.526	0.979969	0.0508751		0.0186865	0.230144	0.191407	0.532345	5.52464	0.286218	209.869	7.16862e+12		1.02044	0.051915	0.884832	0.0260882		119.557	7.03008	0.979969	0.0498561	0.865207		4403.42	224.025	5064.83	20.8645	482.047	401.625	608.26
Kovdor	SE24A062	ok	5779.19	169.325	1.6015	0.073165		4.94403e-08	0.235528	0.193173	0.563731	5.38389	0.185101	220.883	4.01981e+13		0.624416	0.0456854	0.887773	0.0294626		196.033	15.7493	1.6015	0.117173	0.910693		6163.33	450.94	5069.52	23.4804	481.55	394.252	376.706
Kovdor	SE24A043	ok	6694.81	255.958	1.86895	0.067947		0.0105028	0.252676	0.206768	0.590538	4.75475	0.17591	230.749	5.20882e+13		0.535061	0.0363558	0.895177	0.0289459		230.678	17.3582	1.86895	0.126989	0.902965		6794.16	461.643	5081.27	22.8663	523.793	429.57	370.814
Kovdor	SE24A238	ok	381.391	16.3907	0.102826	0.0323387		0.0157393	0.247846	0.0923957	0.559872	20.3927	2.5962	3870.45	9.37652e+12		9.72518	0.3145	0.390329	0.0138486		5.53394	0.265663	0.102826	0.00332526	0.673638		630.949	20.4041	3872.24	26.7348	544.862	195.23	4537.57
Kovdor	SE24A013	ok	1739.99	249.224	1.01377	0.0766515		5.12405e-08	0.114167	0.0795385	0.282975	3.77526	0.152252	178.139	6.32027e+12		0.986417	0.0756104	0.794267	0.0379891		111.021	10.0308	1.01377	0.0777069	0.848386		4512.54	345.893	4911.49	34.076	225.358	158.333	315.788
Kovdor	SE24A035	ok	1067.31	265.472	1.0893	0.0743778		0.00517261	0.114307	0.0854923	0.275366	3.69733	0.136501	166.916	3.64745e+12		0.918019	0.0682803	0.847974	0.037083		127.36	10.9888	1.0893	0.0810199	0.862037		4749.91	353.288	5004.53	31.0279	230.481	173.047	282.364
Kovdor	SE24A023	ok	1024.41	294.568	1.07867	0.0951621		0.00813407	0.108265	0.081418	0.240115	3.83277	0.142316	154.047	3.62628e+12		0.927071	0.088222	0.867134	0.0420297		128.966	13.7729	1.07867	0.102648	0.891074		4717.01	448.88	5036.21	34.3424	225.885	170.954	308.648
Kovdor	SE24A036	ok	1308.7	192.665	0.851441	0.078927		4.93149e-08	0.113232	0.0880859	0.288216	4.07605	0.176548	182.883	5.10232e+12		1.17448	0.0926981	0.882555	0.0375054		103.609	9.28756	0.851441	0.0672017	0.880484		3970.76	313.4	5061.18	30.0777	232.174	181.275	370.973
Kovdor	SE24A022	ok	1211.64	274.491	1.02358	0.0692582		0.00990954	0.110602	0.082511	0.280519	4.04326	0.143117	182.007	4.52536e+12		0.976963	0.0676628	0.884048	0.0454785		124.767	10.7641	1.02358	0.0708913	0.802774		4543.87	314.701	5063.57	36.4064	226.346	169.97	304.776
Kovdor	SE24A010	ok	5729.24	235.768	1.58447	0.105404		0.0125732	0.139287	0.107712	0.319674	4.16864	0.129456	271.853	2.96915e+13		0.631127	0.0665236	0.886554	0.0377143		193.682	22.0149	1.58447	0.16701	0.927324		6120.99	645.18	5067.58	30.1005	271.6	211.941	266.095
Kovdor	JA23A010	ok	382.301	8.35014	0.0694061	0.0208487		0.0343735	2.13613	0.317308	46.3159	2810.32	35.0452	8039.57	8.80494e+14		14.408	0.300387	0.151298	0.00540866		1.44788	0.0599187	0.0694061	0.00144703	0.50379		432.577	9.01866	2360.65	30.5173	1592.13	241.017	32535.7
Kovdor	NO12B457	ok	381.173	5.17675	0.0692907	0.0132739		0.00406242	2.13759	0.323853	46.746	2861.44	34.0106	8598.87	8.91696e+14		14.432	0.191568	0.152252	0.00249521		1.45458	0.0306771	0.0692907	0.000919756	0.629394		431.881	5.73274	2371.37	13.975	4024.31	613.914	81496.8
Kovdor	Jl14C102	ok	387.599	7.24504	0.0709353	0.0178147		9.7145e-08	2.262	0.352386	47.6033	2804.8	36.2962	8207.47	8.928e+14		14.0974	0.25114	0.156908	0.00459809		1.53464	0.0526298	0.0709353	0.00126369	0.519461		441.788	7.87031	2422.61	24.8572	2364.89	369.351	39163.4
Kovdor	AP01B397	ok	404.56	6.07111	0.0743755	0.0143457		0.00436819	1.82161	0.287784	40.9295	2650.22	29.1611	7912.21	8.73939e+14		13.4453	0.192882	0.159724	0.00353239		1.63796	0.0431779	0.0743755	0.00106697	0.544204		462.463	6.63434	2452.75	18.7019	3226.81	505.889	63641.7
Kovdor	Jl14C140	ok	381.985	9.01741	0.0702315	0.0227149		0.0398081	2.21093	0.347132	45.4245	2703.47	36.3603	8062.97	849708852028548		14.2386	0.323429	0.160326	0.00540232		1.55251	0.0630899	0.0702315	0.0015953	0.558967		437.55	9.93889	2459.1	28.4766	2445.2	384.798	41227.2
Kovdor	MY08A135	ok	383.85	6.73527	0.0708345	0.0166863		0.0318468	1.98659	0.317489	45.0107	2642.01	30.1696	7768.73	8.2757e+14		14.1174	0.235568	0.162885	0.00429682		1.59084	0.0496564	0.0708345	0.00118197	0.534579		441.181	7.36169	2485.83	22.2336	3775.77	604.076	65930.9
Kovdor	MY05A008	ok	378.468	5.78777	0.0710124	0.0141852		0.0285608	1.67413	0.28613	35.4172	2105.98	25.8167	6509.9	6.52565e+14		14.082	0.199756	0.174665	0.00418631		1.71018	0.0476299	0.0710124	0.00100732	0.509328		442.252	6.27343	2602.86	19.9698	2703.84	463.176	50742.8
Kovdor	SE24A057	ok	372.211	5.01671	0.0701086	0.0127919		0.0325696	1.97952	0.346896	45.4148	2800.74	30.659	8293.48	8.48751e+14		14.2636	0.182458	0.177478	0.00305852		1.71561	0.0368203	0.0701086	0.00089682	0.596026		436.81	5.58762	2629.45	14.3221	4074.8	713.558	63177.4
Kovdor	MY20B270	ok	387.36	5.52167	0.0730693	0.0135002		0.0119374	1.67577	0.296222	37.9089	2031.46	25.8203	6206.15	6.45623e+14		13.6856	0.184759	0.178177	0.00335381		1.7951	0.0415811	0.0730693	0.000986448	0.582817		454.621	6.13746	2635.98	15.6335	3617.2	637.635	56456.3
Kovdor	JL17C027	ok	387.713	8.17134	0.0731395	0.0198047		0.0120712	2.10115	0.373844	42.7798	2542.24	31.9247	8292.24	8.08194e+14		13.6725	0.27078	0.178204	0.00550273		1.79709	0.0659249	0.0731395	0.00144851	0.539871		455.043	9.012	2636.23	25.646	1559.47	274.514	25201.9
Kovdor	JA17A193	ok	375.24	9.09971	0.0709445	0.0230599		0.0190332	2.06136	0.369256	44.612	2636.3	32.5915	7777.3	810196518068682		14.0955	0.325042	0.180004	0.00585236		1.76077	0.0701841	0.0709445	0.00163598	0.578525		441.843	10.1889	2652.91	26.9598	1911.28	351.628	38928.9
Kovdor	DE09A032	ok	372.165	7.06752	0.0703722	0.0177536		0.0211561	1.85577	0.328673	36.6591	2177.24	29.029		6.66215e+14		14.2102	0.252281	0.180157	0.00501089		1.74805	0.0576805	0.0703722	0.00124936	0.538035		438.397	7.78313	2654.32	23.0608	2104.6	382.443	41265.1
Kovdor	DE09A032	ok	372.339	7.10482	0.0704077	0.0178541		0.0211481	1.8546	0.328496	36.6317	2176.44	29.0197		6.66285e+14		14.203	0.253581	0.18018	0.00501226		1.74916	0.0578178	0.0704077	0.00125706	0.540138		438.612	7.831	2654.53	23.0637	2104.6	382.443	41265.1
Kovdor	MY14A078	ok	378.713	7.88132	0.0716288	0.0195368		0.0254186	1.64246	0.290529	39.6676	2358.74	25.0315	6967.5	7.26422e+14		13.9609	0.27275	0.1802	0.00541511		1.77969	0.0637894	0.0716288	0.0013994	0.545065		445.961	8.71265	2654.71	24.9142	1637.25	288.522	28775.4
Kovdor	SE24A202	ok	359.544	4.93556	0.0681038	0.0130985		0.0382988	1.91892	0.34584	39.9829	2375.72	28.8525	7443.08	698636874483747		14.6835	0.192331	0.181613	0.0029135		1.70537	0.0353193	0.0681038	0.000892058	0.632454		424.722	5.56322	2667.65	13.2841	3991.51	696.909	50185.5
Kovdor	AP24C004	ok	374.716	8.28262	0.0710569	0.0208159		0.0230623	1.82989	0.32582	38.2609	2260.09	28.4273	7192.21	694210877922545		14.0732	0.292946	0.18207	0.00563406		1.7838	0.0665256	0.0710569	0.00147911	0.558153		442.52	9.21145	2671.82	25.6138	1603.57	282.243	25717.2
Kovdor	Ma01D023	ok	399.638	9.12297	0.0759057	0.021321		0.00842325	1.76782	0.319154	37.5646	2247.05	25.6693	6573.78	733145446926796		13.1742	0.280888	0.182682	0.00618723		1.91193	0.0765174	0.0759057	0.00161839	0.532745		471.638	10.0558	2677.37	28.0197	1599.91	288.952	28222.6
Kovdor	SE18C034	ok	370.898	8.87089	0.0704489	0.0222003		0.0215366	1.85415	0.330256	44.2423	2708.45	29.6149	8621.03	8.17818e+14		14.1947	0.315127	0.183281	0.00663377		1.7803	0.0755924	0.0704489	0.00156399	0.522846		438.859	9.74283	2682.78	29.9285	1468.39	258.707	24562.1
Kovdor	Ma01D019	ok	369.931	9.48791	0.0702931	0.0240026		0.00691705	1.77284	0.324149	39.0643	2355.06	28.4578	6791.08	7.126e+14		14.2261	0.341464	0.183572	0.00682168		1.77918	0.0787084	0.0702931	0.00168722	0.542571		437.921	10.5112	2685.41	30.7199	1584.3	289.742	30870.8
Kovdor	JL17C050	ok	372.573	7.99461	0.070902	0.0204213		0.0134866	2.21689	0.398592	42.859	2541.45	34.4695	8387.94	7.79255e+14		14.104	0.288021	0.184554	0.00503641		1.8042	0.0614952	0.070902	0.00144791	0.599138		441.588	9.0178	2694.23	22.541	1656.87	294.975	27387.9
Kovdor	Fe06C008	ok	372.818	10.345	0.0711929	0.0262136		0.0140135	1.61775	0.299314	33.8822	2027.12	24.9796	7672.95	6.18817e+14		14.0463	0.368205	0.186903	0.00696243		1.83465	0.0835691	0.0711929	0.00186622	0.575486		443.338	11.6215	2715.1	30.7095	1200.66	218.33	20649.6
Kovdor	MY20B184	ok	394.449	6.03628	0.0754282	0.0144685		0.0222864	1.88694	0.349854	41.7576	2242.88	28.4763	7002.95	7.25968e+14		13.2576	0.191818	0.187432	0.003605		1.9493	0.0469158	0.0754282	0.00109133	0.60115		468.776	6.78247	2719.76	15.849	3902.21	723.02	61849.1
Kovdor	SE24A081	ok	385.124	6.26881	0.0736784	0.0153146		0.0215086	1.41271	0.265034	37.2788	2223.93	20.2262	6793.28	6.92254e+14		13.5725	0.207858	0.187924	0.0039899		1.90908	0.0499768	0.0736784	0.00112836	0.58501		458.279	7.01837	2724.08	17.4882	2966.15	553.265	41358
Kovdor	JL17C007	ok	375.404	8.46525	0.0718651	0.0211566		0.00737193	1.95368	0.352219	38.98	2319.65	30.1087	6888.57	7.15004e+14		13.915	0.294393	0.188551	0.00581425		1.86831	0.0698679	0.0718651	0.00152042	0.565739		447.383	9.46507	2729.57	25.3868	1354.97	241.5	22219.9
Kovdor	Ap19D427	ok	377.645	9.4983	0.0723401	0.023115		0.0205249	1.58496	0.292945	36.9713	2211.44	24.7673	7310.11	6.80768e+14		13.8236	0.319533	0.188942	0.00728564		1.88455	0.0847252	0.0723401	0.00167214	0.514151		450.239	10.4073	2732.97	31.7357	1418.66	258.958	22470.8
Kovdor	SE24A008	ok	372.825	5.01063	0.0714465	0.0126613		0.000409403	2.36526	0.445202	45.6581	2845.04	39.0558	9735.16	8.73524e+14		13.9965	0.177214	0.189318	0.00309006		1.86498	0.0385252	0.0714465	0.000904607	0.612927		444.864	5.63257	2736.25	13.4292	4549.81	864.532	79363.5
Kovdor	MY08A126	ok	391.642	5.33499	0.0752989	0.0126591		0.0249508	1.73391	0.334269	37.1868	2223.78	25.6513	7211.99	711201994344152		13.2804	0.168118	0.191195	0.0034638		1.98503	0.0438715	0.0752989	0.000953215	0.572779		468.001	5.92447	2752.47	14.8834	3741.68	722.206	63862.3
Kovdor	MY08A133	ok	389.836	5.54123	0.0750421	0.0134963		0.0157624	1.87962	0.35821	41.9074	2507.22	27.8307	6722.17	7.96683e+14		13.3259	0.17985	0.19205	0.00311806		1.9871	0.0419532	0.0750421	0.00101279	0.639251		466.461	6.29552	2759.8	13.3292	4048.08	772.316	68968.7
Kovdor	JL17C141	ok	376.504	8.67079	0.0725191	0.0214516		0.0042507	1.86779	0.351821	39.2018	2340.09	28.3554	7320.3	7.20885e+14		13.7895	0.295806	0.192705	0.00615086		1.92685	0.0741013	0.0725191	0.00155565	0.557804		451.314	9.68142	2765.39	26.1911	1408.54	263.477	22695.2
Kovdor	JA17A226	ok	377.935	10.2339	0.0728211	0.0249933		0.0282867	1.50484	0.280481	40.8447	2438.55	23.1654	7007.35	745997424357065		13.7323	0.343216	0.192925	0.0076595		1.93707	0.0908757	0.0728211	0.00182004	0.532748		453.129	11.3252	2767.25	32.5724	1390.22	266.011	27743.5
Kovdor	SE24A032	ok	389.203	5.80504	0.0750176	0.0139949		0.0264256	1.55323	0.298732	33.6764	2093.65	23.5013	5645.35	6.64517e+14		13.3302	0.186555	0.192946	0.00361278		1.99572	0.0466528	0.0750176	0.00104986	0.598676		466.314	6.52602	2767.44	15.3616	3215.83	621.282	50083.3
Kovdor	SE24A154	ok	358.311	6.72129	0.0690083	0.0178344		0.0203439	1.75056	0.332376	36.8648	2140.69	25.8664	7026.01	6.2718e+14		14.491	0.258439	0.192979	0.0042335		1.83617	0.0519128	0.0690083	0.00123072	0.630808		430.178	7.67197	2767.72	17.9973	3825.28	710.976	50359.5
Kovdor	MY20B229	ok	383.83	6.16825	0.0740414	0.0155516		0.0108825	1.83403	0.350371	45.4113	2445.07	27.9173	7758.91	7.65833e+14		13.506	0.21004	0.193591	0.00298398		1.97634	0.043274	0.0740414	0.00115146	0.710246		460.458	7.16087	2772.91	12.6393	3870.76	738.159	60728.3
Kovdor	AU28A011	ok	383.753	10.1604	0.0740792	0.0250654		0.00629052	1.44842	0.275269	34.9814	2052.2	21.4112	6792.38	640044483290862		13.4991	0.33836	0.194074	0.00647364		1.98228	0.0827097	0.0740792	0.00185683	0.600736		460.685	11.5473	2777	27.3421	1379.4	262.78	21641.1
Kovdor	SE24A128	ok	375.597	5.49752	0.0726145	0.0137087		0.0205418	1.57354	0.306442	34.0251	1950.99	21.8112	5445.38	5.97247e+14		13.7713	0.188787	0.195248	0.00351946		1.95484	0.0442697	0.0726145	0.000995448	0.60534		451.888	6.19478	2786.88	14.7621	3223.27	617.914	41128.4
Kovdor	SE30B439	ok	370.74	6.41227	0.0717177	0.0163925		0.000577723	1.47068	0.284245	36.8019	2215.5	22.1286	7097.65	6.66072e+14		13.9436	0.22857	0.195733	0.00393972		1.93549	0.0502428	0.0717177	0.00117563	0.631486		446.496	7.3192	2790.94	16.4778	2458.28	465.604	33161.7
Kovdor	MY05A132	ok	389.878	6.20372	0.0755278	0.0147296		0.0298951	1.82084	0.350184	43.0073	2572.35	27.3292		8.15861e+14		13.2402	0.195022	0.196356	0.00419868		2.04481	0.0530939	0.0755278	0.00111249	0.567281		469.373	6.91367	2796.15	17.4969	2971.5	571.815	52243.7
Kovdor	DE09A006	ok	386.127	7.94926	0.0748459	0.0195002		0.00814489	1.68632	0.328932	37.9418	2222.27	24.9092		6.99659e+14		13.3608	0.260538	0.196828	0.00487048		2.03121	0.0639934	0.0748459	0.00145951	0.618955		465.284	9.07315	2800.07	20.2406	1853.48	370.592	34341.8
Kovdor	DE09A006	ok	387.326	7.98192	0.0750861	0.019523		0.0081389	1.68426	0.328591	37.8873	2220.7	24.8937		7.01362e+14		13.318	0.260008	0.196876	0.00487258		2.03824	0.0642507	0.0750861	0.00146591	0.619331		466.725	9.11187	2800.47	20.2436	1853.48	370.592	34341.8
Kovdor	SE24A105	ok	378.048	5.60533	0.0732902	0.0136629		0.00912354	1.73327	0.327588	37.8442	2233.96	24.8396	6477.44	6.88211e+14		13.6444	0.186422	0.197066	0.00392826		1.9914	0.0481255	0.0732902	0.00100135	0.56536		455.948	6.22955	2802.05	16.3023	3543.07	662.41	48067.7
Kovdor	AP19E047	ok	380.802	9.79811	0.0739843	0.0236474		0.0131189	1.54102	0.297296	39.106	2332.59	23.7126	7989.72	7.21041e+14		13.5164	0.319628	0.19848	0.00733813		2.02469	0.0888582	0.0739843	0.00174954	0.538821		460.115	10.8805	2813.74	30.2044	1345.18	257.171	20767.1
Kovdor	MY20B209	ok	379.499	5.30022	0.0737464	0.0131867		0.022273	1.8161	0.357946	39.9524	2144.1	27.8053	6024.12	6.68148e+14		13.56	0.178811	0.198644	0.00308794		2.01984	0.041174	0.0737464	0.00097247	0.646888		458.687	6.04856	2815.08	12.6982	3759.15	739.966	59820.4
Kovdor	Ma01D004	ok	378.334	9.06305	0.0735487	0.0214858		0.0358552	1.60412	0.310053	42.7816	2611.07	25.0283	7443.55	799909432028067		13.5964	0.29213	0.198927	0.00750793		2.0173	0.0876099	0.0735487	0.00158025	0.494728		457.5	9.82974	2817.41	30.8237	1410.99	272.619	26640.3
Kovdor	SE24A283	ok	366.93	5.78297	0.0713241	0.0148242		0.0101162	1.55492	0.308906	34.7738	2210.09	25.6862	5905.65	6.61998e+14		14.0205	0.207842	0.199054	0.00367704		1.95753	0.0463646	0.0713241	0.00105732	0.62588		444.128	6.58383	2818.45	15.085	3375.9	638.206	41457.8
Kovdor	JA30A019	ok	373.257	9.23026	0.0726232	0.022431		0.0137973	1.97113	0.38212	38.7577	2374.19	31.8915	7328.11	7.28931e+14		13.7697	0.308869	0.199585	0.00741199		1.9985	0.0867062	0.0726232	0.00162901	0.517016		451.94	10.1375	2822.81	30.3147	1399.63	275.877	29163.9
Kovdor	SE18C033	ok	373.613	10.1775	0.0727565	0.0253004		0.0330535	1.74239	0.338818	40.4131	2442.65	27.0023	8155	7.43383e+14		13.7445	0.347741	0.200171	0.00735559		2.00805	0.0895873	0.0727565	0.00184077	0.567094		452.742	11.4546	2827.59	29.9831	1359.48	261.519	22059.2
Kovdor	MY05A031	ok	377.429	6.37729	0.073541	0.0155243		0.0041663	1.66903	0.328011	39.0041	2338.29	25.071	7207.5	7.17984e+14		13.5979	0.211098	0.200482	0.00460453		2.03286	0.0563545	0.073541	0.00114167	0.560003		457.454	7.10167	2830.12	18.7357	2651.45	522.108	48127.8
Kovdor	AU20B006	ok	368.466	8.42139	0.0717969	0.0201567		0.0159228	1.62945	0.31466	40.3435	2401.92	24.9962	7725.2	718888084773235		13.9282	0.280747	0.20066	0.00751621		1.9864	0.0844947	0.0717969	0.00144719	0.473869		446.973	9.00951	2831.57	30.5523	1553.39	300.354	24727.9
Kovdor	SE24A251	ok	358.805	5.48504	0.0700405	0.0142024		0.0220224	1.41748	0.282797	31.516	1906.26	22.1402	5202.54	5.582e+14		14.2775	0.202774	0.20203	0.00378998		1.95104	0.0459066	0.0700405	0.000994744	0.603606		436.4	6.19792	2842.67	15.286	3017.78	577.017	36772
Kovdor	AU20B008	ok	381.134	9.09693	0.0746102	0.0219401		0.00635293	1.56766	0.308621	34.8033	2017.99	23.1442	5884.91	6.27711e+14		13.403	0.294062	0.20355	0.00670105		2.09397	0.0828417	0.0746102	0.00163695	0.554574		463.871	10.1774	2854.87	26.7961	1513.55	298.322	23164.5
Kovdor	DE09A110	ok	371.983	7.25095	0.0728186	0.0177459		0.00710656	1.70986	0.341242	41.9468	2458.03	25.1273		742210876762582		13.7328	0.243701	0.2037	0.0055925		2.04519	0.0668585	0.0728186	0.00129223	0.542845		453.114	8.04094	2856.07	22.3444	1911.72	392.643	35157.9
Kovdor	DE09A110	ok	373.648	7.27924	0.0731526	0.0177352		0.00710178	1.70795	0.340917	41.8916	2456.43	25.1129		7.45084e+14		13.6701	0.242442	0.203746	0.00559294		2.05504	0.0671615	0.0731526	0.00129738	0.542671		455.121	8.07168	2856.44	22.3403	1911.72	392.643	35157.9
Kovdor	Ap19D384	ok	379.871	10.4801	0.0744503	0.0256724		0.0136231	1.43654	0.286369	35.4103	2114.58	21.9028	8227.73	6.52553e+14		13.4318	0.344826	0.204355	0.00734046		2.09775	0.0926181	0.0744503	0.00191132	0.581466		462.911	11.8841	2861.3	29.2206	1243.87	244.861	19274.2
Kovdor	DE09A209	ok	383.378	9.10759	0.07547	0.0224208		0.0204958	1.56083	0.322146	42.4167	2476.93	22.3949		7.67302e+14		13.2503	0.297082	0.207245	0.00570967		2.15655	0.0766019	0.07547	0.0016921	0.631204		469.027	10.516	2884.12	22.3667	1723.93	367.623	30904.5
Kovdor	MY08A128	ok	382.693	5.83789	0.0753361	0.0139795		0.0183925	1.52406	0.314757	35.5662	2121.63	22.4805	6833.76	6.60295e+14		13.2738	0.185562	0.207264	0.00406431		2.15292	0.0518472	0.0753361	0.00105316	0.580492		468.224	6.54556	2884.27	15.9196	3322.37	686.965	56496.4
Kovdor	DE09A209	ok	384.515	9.13316	0.0757121	0.0224157		0.0204549	1.55563	0.321238	42.2512	2472.11	22.3567		7.68113e+14		13.2079	0.296065	0.207387	0.00571275		2.16495	0.0768867	0.0757121	0.00169714	0.631174		470.478	10.5461	2885.23	22.3612	1723.93	367.623	30904.5
Kovdor	AP01B417	ok	397.031	7.45193	0.0782869	0.0175534		0.00951927	1.39543	0.287292	38.1715	2470.16	20.8797	7503.18	790812096253827		12.7735	0.224219	0.208127	0.0046564		2.24657	0.0638858	0.0782869	0.0013742	0.617272		485.889	8.52903	2891.02	18.1523	2385.89	487.133	44198.7
Kovdor	AP01B396	ok	390.026	7.19123	0.0769204	0.0173283		0.0305216	1.54368	0.318153	42.6334	2782	23.8046	8054.6	8.75143e+14		13.0005	0.225275	0.208367	0.00439891		2.2099	0.0603572	0.0769204	0.0013329	0.634451		477.715	8.27797	2892.89	17.1259	2702.65	552.784	51334.3
Kovdor	Ma01D014	ok	375.082	10.2431	0.0739512	0.0258007		0.0296276	1.53598	0.313881	38.357	2332.61	23.3129	7241.92	7.09599e+14		13.5224	0.348888	0.208407	0.0065613		2.125	0.0864972	0.0739512	0.00190799	0.633852		459.917	11.8662	2893.2	25.539	1270.22	259.578	23378.9
Kovdor	MY05A248	ok	395.488	11.6168	0.0780888	0.0276971		0.0230021	1.65617	0.343517	38.5599	2373.45	24.845	7369.43	7.63234e+14		12.8059	0.354687	0.209058	0.00724822		2.2509	0.0998852	0.0780888	0.00216283	0.624151		484.705	13.4249	2898.26	28.1124	3112.17	644.911	52775.2
Kovdor	SE30B423	ok	366.527	7.24984	0.0723759	0.018574		0.0220334	1.2496	0.257016	35.8789	2151.69	18.6122	6753.2	635921272101301		13.8167	0.256633	0.209563	0.00472867		2.09127	0.0611191	0.0723759	0.00134431	0.635536		450.454	8.36674	2902.17	18.2897	2047.45	412.33	27384.8
Kovdor	MY08A136	ok	385.413	5.57505	0.0761782	0.0133396		0.00262778	1.62303	0.340924	44.6407	2677.01	23.6547	8062.98	8.33021e+14		13.1271	0.17511	0.209904	0.00364873		2.20472	0.0483083	0.0761782	0.00101618	0.608797		473.27	6.31322	2904.8	14.0865	3480.94	731.957	58310.4
Kovdor	Jl14C179	ok	405.304	10.9234	0.080199	0.0241807		8.73859e-08	1.21981	0.25052	35.0225	2037.03	16.9727	6336.17	6.65553e+14		12.469	0.301508	0.210336	0.0083904		2.32586	0.108495	0.080199	0.00193927	0.518374		497.311	12.0253	2908.13	32.3167	1419.2	292.083	20136
Kovdor	MY08A134	ok	392.918	5.20421	0.0777953	0.012468		0.0312853	2.54461	0.531607	45.2982	2646.81	36.2641	9641.56	8.56863e+14		12.8542	0.160266	0.210931	0.00280462		2.26254	0.0412405	0.0777953	0.00096995	0.684017		482.95	6.0214	2912.71	10.7676	5421.57	1133.88	88872.2
Kovdor	JA30A018	ok	377.349	11.213	0.0750587	0.026733		0.0139617	1.59683	0.325173	42.7091	2615.07	24.9501	7822.4	7.9888e+14		13.3229	0.356161	0.214222	0.0090501		2.217	0.110837	0.0750587	0.00200654	0.534723		466.561	12.4726	2937.76	34.137	1138.74	235.801	22919.2
Kovdor	Ap19D399	ok	378.932	9.56884	0.0754404	0.0233424		0.00750174	1.64106	0.347853	41.8081	2501.04	24.8051	8831.88	7.68487e+14		13.2555	0.309415	0.214783	0.00676418		2.23412	0.0875785	0.0754404	0.00176096	0.595462		468.849	10.9441	2941.99	25.4385	1464.17	306.49	22472.2
Kovdor	DE05B035	ok	376.094	8.51085	0.0749389	0.0203079		0.0126184	1.3753	0.286735	37.4223	2301.53	21.2836	8278.83	6.99881e+14		13.3442	0.270993	0.215383	0.00681761		2.22546	0.0836948	0.0749389	0.00152185	0.539991		465.842	9.46028	2946.49	25.558	2217.76	458.965	36817.2
Kovdor	SE18C022	ok	363.969	9.94638	0.0726768	0.0250809		0.0114405	1.55065	0.333496	42.7226	2571.89	24.1776	7918.4	7.57111e+14		13.7595	0.345102	0.216952	0.00754468		2.174	0.0932141	0.0726768	0.0018228	0.584954		452.262	11.3432	2958.2	28.0509	1173.26	249.947	19103.4
Kovdor	NO05A006	ok	367.407	5.44736	0.0734423	0.0137296		0.0218184	1.57334	0.341475	39.0584	2525.53	23.5013	7891.03	7.5026e+14		13.6161	0.186944	0.217608	0.00353435		2.20355	0.0468634	0.0734423	0.00100833	0.645572		456.861	6.2725	2963.08	13.0954	4309.85	948.716	74714.7
Kovdor	JL17C206	ok	388.864	10.2171	0.078006	0.0241659		0.0194638	1.41822	0.29767	32.9002	1937.22	20.2483	6154.4	6.12368e+14		12.8195	0.309796	0.219619	0.00719437		2.36211	0.0961557	0.078006	0.00188509	0.593648		484.21	11.7014	2977.9	26.3788	1120.98	234.069	16968.8
Kovdor	AP19E009	ok	364.676	11.7766	0.0733186	0.0296242		0.0234421	1.34127	0.287159	34.5011	2084.95	20.839	8362.34	6.16486e+14		13.6391	0.404047	0.221421	0.00895291		2.23838	0.112198	0.0733186	0.00217201	0.591009		456.118	13.5121	2991.05	32.523	1200.6	255.282	18768.8
Kovdor	AU20B009	ok	385.385	9.3315	0.0776405	0.0218562		0.0265896	1.25936	0.279753	32.8397	1926.19	17.9381	6257.4	6.00528e+14		12.8799	0.281505	0.222474	0.00709244		2.38161	0.092055	0.0776405	0.00169693	0.565454		482.024	10.5352	2998.69	25.6259	1252.55	278.559	18486
Kovdor	DE09A081	ok	373.342	8.85482	0.0752343	0.0218359		0.0247503	1.38731	0.303314	34.4637	1993.93	19.8893		6.03679e+14		13.2918	0.290238	0.222807	0.00631701		2.31125	0.0827103	0.0752343	0.00164281	0.61018		467.614	10.2108	3001.09	22.7854	1532.21	344.353	27503.1
Kovdor	DE09A081	ok	374.587	8.91114	0.0754895	0.0219188		0.0247433	1.38666	0.303193	34.4446	1993.39	19.8845		6.05548e+14		13.2469	0.290355	0.222829	0.00631673		2.31931	0.0831089	0.0754895	0.00165464	0.611684		469.144	10.2831	3001.24	22.7819	1532.21	344.353	27503.1
Kovdor	JL17C093	ok	378.608	9.71051	0.0764056	0.0229421		1.35414e-07	1.4444	0.305565	38.0936	2276.14	20.9085	6941.18	696657808128517		13.088	0.300267	0.223677	0.00777116		2.35639	0.0981064	0.0764056	0.0017529	0.55104		474.632	10.8891	3007.35	27.9067	1084.71	227.546	16679.1
Kovdor	DE05B064	ok	378.546	9.06239	0.076422	0.0216201		0.0190125	1.15851	0.253683	33.8395	2046.08	17.5372	7371.04	6.24539e+14		13.0852	0.282904	0.223924	0.00695188		2.3595	0.0892649	0.076422	0.00165225	0.571476		474.731	10.2637	3009.12	24.9333	1910.79	415.602	31384.7
Kovdor	SE30B440	ok	368.318	7.27098	0.0743543	0.0183465		0.00169758	1.22005	0.267239	36.8817	2214.52	17.5892	7009.36	6.55782e+14		13.4491	0.246744	0.224035	0.00484088		2.2968	0.0651046	0.0743543	0.00136414	0.647236		462.336	8.48223	3009.92	17.3524	2056.82	441.525	26582.2
Kovdor	JL17C183	ok	371.336	9.07256	0.0750632	0.0224881		0.00424293	1.75841	0.386932	41.0085	2445.58	25.8829	7353.89	7.38257e+14		13.3221	0.299589	0.224857	0.00650012		2.32721	0.0852335	0.0750632	0.00168803	0.614014		466.588	10.4927	3015.8	23.2032	1357.51	296.995	21193.3
Kovdor	Fe06C026	ok	392.826	11.9468	0.0802117	0.027073		0.0275714	1.32291	0.295131	39.8022	2348.23	18.6604	5979.82	7.42157e+14		12.467	0.33752	0.23112	0.00938408		2.55609	0.12474	0.0802117	0.00217158	0.554765		497.386	13.4658	3059.82	32.47	1045.1	228.158	16222.4
Kovdor	MY08A130	ok	389.452	6.46044	0.0796831	0.0149875		0.0060404	1.31662	0.301546	35.0669	2083.02	18.3672	7134.88	6.55e+14		12.5497	0.188089	0.232457	0.00447164		2.55394	0.0622798	0.0796831	0.00119425	0.614602		494.231	7.4073	3069.04	15.3715	2840.27	651.256	45643.8
Kovdor	MY05A229	ok	388.681	7.07945	0.0796658	0.0166053		0.0131145	1.70089	0.388749	42.0789	2499.65	23.8193	7797.8	7.86761e+14		12.5524	0.208438	0.233603	0.00478688		2.56597	0.0676774	0.0796658	0.00132288	0.629587		494.128	8.20516	3076.9	16.3638	2771.85	633.084	44135.3
Kovdor	MY05A083	ok	386.169	7.25512	0.0792048	0.0173531		0.0153366	1.45619	0.33523	36.1552	2163.66	20.8142	6816.98	6.76815e+14		12.6255	0.219091	0.234069	0.00463007		2.55621	0.0672632	0.0792048	0.00137444	0.65947		491.374	8.52684	3080.08	15.7921	2320.72	534.922	39447.1
Kovdor	NO12B537	ok	392.389	6.988	0.0804918	0.0164602		0.0197118	1.12671	0.260827	31.9705	1930.54	15.4494	6579.48	6.09605e+14		12.4236	0.204496	0.234088	0.00432948		2.59796	0.0643228	0.0804918	0.00132491	0.664819		499.058	8.2146	3080.21	14.7655	2152.58	502.19	37646.6
Kovdor	SE30B422	ok	367.123	6.96558	0.075857	0.0173644		0.0269513	1.33991	0.314631	36.3795	2166.36	19.0934	7160.29	6.41745e+14		13.1827	0.228909	0.239001	0.00480512		2.49975	0.0664075	0.075857	0.00131721	0.653639		471.346	8.18463	3113.33	16.0071	2170.34	498.967	27774.7
Kovdor	JL17C162	ok	363.083	10.7561	0.0752237	0.0266426		1.26535e-07	1.40589	0.328104	40.7889	2481.34	21.0628	7421.65	7.259e+14		13.2937	0.354178	0.240745	0.00854182		2.49697	0.110791	0.0752237	0.00200416	0.600462		467.55	12.4568	3124.9	28.222	1121.82	260.151	17831.9
Kovdor	AP24C048	ok	393.471	10.2449	0.081919	0.0233214		0.0295111	1.37112	0.324653	34.7238	2015.55	19.3531	6821.67	6.42489e+14		12.2072	0.284688	0.243551	0.00758679		2.75091	0.107047	0.081919	0.00191046	0.599315		507.567	11.8372	3143.32	24.7407	1172.27	271.29	16475.1
Kovdor	MY08A127	ok	378.381	6.07326	0.0792441	0.0138141		0.0180833	1.20614	0.29899	35.6956	2130.85	16.8893	6337.25	648378510293855		12.6192	0.174323	0.247424	0.00488908		2.7034	0.0651785	0.0792441	0.00109468	0.572966		491.609	6.79113	3168.36	15.6621	2646.01	656.702	42730.3
Kovdor	NO12B614	ok	384.044	7.11579	0.0805098	0.0169938		0.0160421	1.24776	0.307406	32.9615	1994.65	17.022	6354.64	6.17682e+14		12.4208	0.211078	0.247999	0.00452067		2.75296	0.0686073	0.0805098	0.00136817	0.681899		499.165	8.48271	3172.04	14.4441	2464.03	612.283	42959.4
Kovdor	AP24C049	ok	388.421	9.56623	0.0816541	0.0218119		1.19551e-07	1.36415	0.333521	31.6241	1844.7	19.2849	6344.63	5.82453e+14		12.2468	0.267125	0.249712	0.00731649		2.81138	0.102691	0.0816541	0.00178103	0.597143		505.988	11.0366	3182.94	23.1963	1161.09	277.383	16329.9
Kovdor	AP24C005	ok	391.877	11.6292	0.0824592	0.026175		0.0068512	1.25136	0.297937	35.8656	2087.72	16.8939	7112.98	6.58614e+14		12.1272	0.317429	0.250283	0.00908184		2.84559	0.127316	0.0824592	0.00215837	0.585023		510.785	13.3698	3186.56	28.7193	1110.25	261.238	15461.3
Kovdor	MY05A180	ok	384.445	7.5314	0.0811087	0.017168		0.0193564	1.30298	0.328179	35.4039	2099.75	18.2207	6657.63	6.51303e+14		12.3291	0.211666	0.251997	0.00580214		2.81815	0.080939	0.0811087	0.00139247	0.597758		502.737	8.63099	3197.35	18.2075	2126.53	535.577	34323.8
Kovdor	MY14A229	ok	381.605	8.79606	0.0806157	0.0200463		0.0310289	1.30824	0.322208	35.6493	2096.54	17.949	7049.91	6.4514e+14		12.4045	0.248665	0.252844	0.00713607		2.81043	0.0972915	0.0806157	0.00161605	0.579071		499.797	10.0191	3202.66	22.309	1384.89	335.984	21538.5
Kovdor	NO12B511	ok	383.914	6.91324	0.0811301	0.0161806		0.0299012	1.21992	0.305326	34.2997	2085.44	16.5601	6875.18	6.43977e+14		12.3259	0.19944	0.253031	0.0047424		2.83046	0.070084	0.0811301	0.00131273	0.653481		502.865	8.13664	3203.83	14.8135	2376.73	599.321	41122.9
Kovdor	JA17A121	ok	374.528	11.2329	0.079319	0.0260576		0.0284125	1.69059	0.415606	38.9955	2378.67	24.0478	7366.27	7.22875e+14		12.6073	0.328517	0.25446	0.00947792		2.7829	0.126503	0.079319	0.00206686	0.573235		492.056	12.8218	3212.73	29.4184	1542.36	389.877	27762.4
Kovdor	JL17C072	ok	376.17	13.9592	0.0797045	0.0328667		0.00495489	1.1363	0.277916	32.9768	2039.43	16.4588	6860.44	6.17271e+14		12.5463	0.412357	0.254743	0.0111956		2.79954	0.153635	0.0797045	0.00261963	0.598897		494.359	16.248	3214.49	34.7063	983.148	238.276	15132.8
Kovdor	Ma01D005	ok	379.805	11.3284	0.0805172	0.0261847		0.00173606	1.27618	0.312452	39.7216	2394.15	18.1677	6944.07	7.30233e+14		12.4197	0.325206	0.255046	0.00914157		2.83145	0.125684	0.0805172	0.00210832	0.589897		499.209	13.0716	3216.36	28.3011	1109.28	271.495	19113.5
Kovdor	SE30B421	ok	370.338	7.44771	0.07852	0.0178067		0.0175233	1.2228	0.304608	35.2745	2079.4	16.7151	7016.09	619427629044926		12.7356	0.226779	0.255192	0.00568869		2.7628	0.0788245	0.07852	0.00139818	0.624123		487.283	8.67687	3217.27	17.6	1990.14	485.359	24433.8
Kovdor	MY20B165	ok	397.085	7.35636	0.0843371	0.0168909		0.0163404	1.12916	0.286425	36.9541	1989.86	15.1416	6322.59	6.34891e+14		11.8572	0.200279	0.256081	0.00457068		2.97782	0.0731764	0.0843371	0.00142453	0.687353		521.959	8.81636	3222.76	14.0859	2362.18	599.074	33530.7
Kovdor	Jl14C180	ok	378.4	11.8786	0.0804599	0.0276068		0.0230816	1.04661	0.263542	29.8688	1764.04	14.4983	6093.33	5.37447e+14		12.4286	0.343113	0.25692	0.00956273		2.85022	0.132083	0.0804599	0.00222124	0.595728		498.867	13.7721	3227.92	29.3622	1214.72	306.514	17156.4
Kovdor	AP19E048	ok	408.12	12.9427	0.0872767	0.0282046		0.0247906	1.28096	0.325522	33.462	1977.61	16.7233	7389.62	6.51015e+14		11.4578	0.323163	0.260278	0.00935714		3.1321	0.143118	0.0872767	0.0024616	0.617249		539.411	15.2139	3248.39	28.3146	1122.06	282.554	14696.1
Kovdor	AP01B416	ok	396.135	8.86685	0.0848983	0.0202156		0.0222024	1.15978	0.296808	38.8046	2502.74	15.9599	7320.06	7.92487e+14		11.7788	0.238115	0.261701	0.00592975		3.06341	0.0930227	0.0848983	0.00171627	0.665736		525.294	10.6191	3256.97	17.8338	1993.44	505.941	33954.4
Kovdor	NO12B482	ok	380.647	6.90305	0.0815857	0.0161328		0.0175087	1.08125	0.277474	31.1931	1887.99	14.5797	6735.39	5.77464e+14		12.2571	0.197741	0.261843	0.00484498		2.94548	0.072308	0.0815857	0.00131621	0.657174		505.581	8.15644	3257.83	14.5624	2155.45	557.115	37017.4
Kovdor	Ap19D428	ok	385.869	10.9705	0.0827583	0.0238395		0.0250543	1.16554	0.304316	32.0802	1909.52	15.9314	7127.33	5.93684e+14		12.0834	0.288062	0.262212	0.0096803		2.99202	0.131488	0.0827583	0.00197292	0.542473		512.566	12.2193	3260.04	29.0499	1057.53	272.693	14651.1
Kovdor	JA30A007	ok	362.364	12.0396	0.0778011	0.028425		0.00665868	1.18987	0.302357	32.6275	2001.98	17.9585	6787.96	5.85667e+14		12.8533	0.365355	0.263013	0.0107893		2.8214	0.140809	0.0778011	0.0022115	0.569553		482.984	13.7288	3264.85	32.267	899.506	232.722	17528.8
Kovdor	Jl14C067	ok	380.511	11.5689	0.0818968	0.0264346		0.00783	1.2155	0.304646	38.0732	2233.74	16.732	6953.09	6.82306e+14		12.2105	0.322779	0.26441	0.00942818		2.9857	0.132527	0.0818968	0.00216491	0.595543		507.434	13.4138	3273.18	28.0294	1291.73	324.67	18495.9
Kovdor	AU28A010	ok	376.322	12.0611	0.0812009	0.0274361		0.0156558	1.14689	0.288868	32.4587	1908.95	15.6941	6652.52	5.78376e+14		12.3151	0.33788	0.265991	0.0103575		2.97803	0.141856	0.0812009	0.00222784	0.575976		503.287	13.8083	3282.54	30.5869	1091.36	275.594	15850.3
Kovdor	MY20B249	ok	390.934	7.28343	0.0843968	0.0167731		0.0123103	1.13966	0.303443	35.1525	1864.53	15.2778	6412.55	5.87024e+14		11.8488	0.198741	0.266228	0.00471651		3.098	0.0755808	0.0843968	0.0014156	0.687518		522.313	8.76083	3283.95	13.9145	2399.5	637.444	32875.2
Kovdor	JA30A006	ok	380.852	13.5488	0.0825955	0.0305035		0.015602	1.21373	0.304494	38.6763	2404.62	17.2567	7059.56	7.34201e+14		12.1072	0.369312	0.269067	0.0114675		3.06421	0.160597	0.0825955	0.00251945	0.58201		511.596	15.6055	3300.6	33.4309	917.83	234.468	16852.7
Kovdor	Ap19D385	ok	386.671	11.9743	0.0840202	0.0262778		0.0315835	1.17125	0.306865	32.2985	1920.64	15.8284	7704.79	5.98143e+14		11.9019	0.312756	0.270227	0.0101564		3.1305	0.143564	0.0840202	0.00220787	0.573002		520.074	13.6664	3307.34	29.4663	1028.14	266.005	14120
Kovdor	JA17A100	ok	361.928	9.64851	0.0788123	0.0231756		0.0411183	1.48436	0.395503	32.9006	1994.49	20.6089	8029.58	5.86067e+14		12.6884	0.29406	0.27163	0.00799174		2.95171	0.11055	0.0788123	0.00182652	0.618791		489.03	11.3335	3315.46	23.0519	1288.8	353.25	22491.7
Kovdor	AU28A012	ok	371.784	11.2112	0.0814992	0.0250191		0.0285579	1.08487	0.288508	32.2787	1883.44	14.4931	6359.82	5.6246e+14		12.2701	0.306986	0.275624	0.010226		3.09722	0.138597	0.0814992	0.00203904	0.559101		505.065	12.6363	3338.31	29.0185	1049.87	279.814	14884.9
Kovdor	AP19E010	ok	383.876	12.9291	0.0841759	0.0286122		0.0101043	1.16506	0.302695	32.9828	1950.17	15.5787	7856.78	6.02267e+14		11.8799	0.33991	0.275773	0.0109456		3.20066	0.156604	0.0841759	0.00240846	0.584775		521	14.9069	3339.16	31.0417	1004.76	259.244	13517.3
Kovdor	MY14A052	ok	359.128	9.43031	0.0787605	0.0213067		0.00870667	1.30369	0.353146	34.4258	2061.34	18.4431	6917.33	597536218860430		12.6967	0.270525	0.275937	0.00916633		2.99654	0.118258	0.0787605	0.00167813	0.53989		488.72	10.413	3340.09	25.9785	1349.07	364.814	22077.5
Kovdor	AU20B007	ok	384.235	11.7329	0.0844194	0.0264359		0.0121203	1.11897	0.3018	32.0433	1864.67	14.6274	7205.38	5.76057e+14		11.8456	0.313149	0.276954	0.00935785		3.22368	0.1383	0.0844194	0.0022317	0.616203		522.448	13.8114	3345.84	26.4123	1085.7	293.185	14720.1
Kovdor	NO05A058	ok	386.883	6.63583	0.0852015	0.0151367		0.0275516	1.09737	0.305172	29.4751	1906.06	14.3279	6480.14	5.92135e+14		11.7369	0.177658	0.278369	0.00439787		3.27016	0.07155	0.0852015	0.00128967	0.691816		527.096	7.97849	3353.8	12.3423	3166.82	887.109	47849.5
Kovdor	AU28A013	ok	378.645	12.534	0.0839787	0.0285325		0.0174186	1.08785	0.293442	32.8751	1924.53	14.1396	6406.38	5.84595e+14		11.9078	0.339759	0.282634	0.0101936		3.27262	0.150501	0.0839787	0.00239613	0.620434		519.828	14.832	3377.54	28.1256	1029.34	278.221	14198.7
Kovdor	Fe06C007	ok	368.683	12.498	0.0821538	0.0289171		0.0204833	1.12829	0.316647	30.0655	1762.73	15.1821	6589.03	5.2398e+14		12.1723	0.351987	0.28545	0.0106474		3.23339	0.152605	0.0821538	0.00237565	0.612695		508.966	14.7178	3392.99	29.0541	825.509	227.75	12380.9
Kovdor	DE05B005	ok	375.869	10.1534	0.0844882	0.0224232		0.0253697	0.969476	0.274052	26.3686	1630.15	13.5779	6710.09	4.93528e+14		11.836	0.2654	0.290617	0.00879215		3.38547	0.127487	0.0844882	0.00189449	0.595455		522.857	11.7241	3420.91	23.5161	1711.34	479.776	25332
Kovdor	MA19a002	ok	396.854	11.9918	0.0894529	0.0256467		0.00652479	1.12059	0.321399	29.4927	1742.54	13.8163	7339.33	5.56395e+14		11.1791	0.286706	0.292261	0.0094807		3.60468	0.149064	0.0894529	0.00229417	0.620194		552.301	14.1647	3429.68	25.1987	1138.25	321.725	13982.7
Kovdor	MY08A129	ok	389.644	6.96015	0.0881644	0.0150976		0.0083033	0.966783	0.283218	33.0737	1984.13	12.1944	6635.07	6.17266e+14		11.3424	0.171244	0.294518	0.00509837		3.5802	0.0822357	0.0881644	0.00133107	0.657286		544.672	8.22323	3441.63	13.4352	2119.77	621.708	30812.4
Kovdor	SE18C021	ok	369.022	13.6902	0.0836284	0.0309985		0.020746	1.15661	0.316749	32.4448	1929.57	16.0175	7297.08	5.7336e+14		11.9577	0.37067	0.295417	0.0120641		3.40636	0.174644	0.0836284	0.00259236	0.604613		517.744	16.0493	3446.36	31.6837	850.308	230.693	12293.7
Kovdor	NO05A032	ok	375.401	7.34409	0.0853182	0.0167665		0.0166403	1.10551	0.318412	26.7094	1703.85	14.5349	7286.16	515623967509065		11.7208	0.196517	0.297104	0.00542295		3.49503	0.086623	0.0853182	0.00143049	0.676488		527.789	8.84918	3455.19	14.1522	3049.28	887.645	46460.1
Kovdor	MY08A131	ok	388.436	8.10975	0.0886552	0.0175205		0.00654319	1.00436	0.294608	35.0461	2098.16	12.5668	6973.02	6.50269e+14		11.2797	0.197626	0.299603	0.00624		3.66228	0.0996757	0.0886552	0.00155329	0.643738		547.579	9.59388	3468.17	16.1332	2176.22	639.076	31355.8
Kovdor	MY14A211	ok	361.064	10.1628	0.0834228	0.023636		0.0108788	1.22518	0.359477	33.9241	1987.32	16.1114	6523.29	5.77194e+14		11.9871	0.283328	0.306634	0.0085931		3.527	0.129302	0.0834228	0.00197178	0.644724		516.521	12.2085	3504.06	21.6512	1264.27	365.873	18883.4
Kovdor	AP19E022	ok	376.324	14.4592	0.0869909	0.0312857		0.00651275	0.979027	0.293179	34.7926	2077.23	12.5355	8168.49	623623687156847		11.4955	0.359643	0.306967	0.0129272		3.68186	0.193158	0.0869909	0.00272157	0.59635		537.716	16.8228	3505.74	32.532	831.039	246.96	10695.2
Kovdor	JA23A007	ok	396.854	14.8389	0.0932244	0.0304342		0.0279464	1.03244	0.311686	31.13	1853.84	12.6424	5916.11	5.89185e+14		10.7268	0.326462	0.316306	0.0124209		4.06573	0.201992	0.0932244	0.00283721	0.612584		574.579	17.4869	3551.97	30.2351	805.41	247.884	12269.2
Kovdor	MA19a056	ok	382.904	11.9145	0.0900494	0.0254566		0.00905824	1.02604	0.316901	26.8237	1595.29	13.0387	7647.61	4.91788e+14		11.105	0.282696	0.316873	0.0100201		3.9343	0.159714	0.0900494	0.00229235	0.627084		555.829	14.1495	3554.73	24.3425	1009.93	308.348	12744.2
Kovdor	JA17A101	ok	367.814	12.7956	0.0870491	0.0284908		0.0582418	1.23876	0.377283	30.6779	1792.89	15.5505	7026.23	5.31811e+14		11.4878	0.327296	0.320364	0.0111508		3.84511	0.172954	0.0870491	0.0024801	0.633407		538.061	15.3298	3571.58	26.7623	1082.26	339.069	17082.7
Kovdor	JA23A021	ok	379.426	14.3091	0.0916428	0.0302265		0.00629716	1.06396	0.338156	30.2242	1789.53	13.0033	6689.83	544536798199654		10.9119	0.329829	0.331856	0.0124108		4.19324	0.201636	0.0916428	0.00277004	0.628593		565.246	17.0854	3625.68	28.6463	811.597	262.536	12407.8
Kovdor	SE24A178	ok	375.112	8.71115	0.0906558	0.0186821		0.0159932	0.812213	0.265943	24.1945	1366.42	9.02495	5884.95	4.09874e+14		11.0307	0.206077	0.332153	0.00708991		4.15178	0.11777	0.0906558	0.00169364	0.658603		559.414	10.451	3627.05	16.3486	1689.53	538.73	16212.7
Kovdor	OC02B006	ok	389.383	15.9622	0.0941835	0.0329974		0.0103947	0.922827	0.297837	28.4067	1703.24	11.044	5624.27	5.30276e+14		10.6176	0.350352	0.332753	0.0134872		4.32113	0.225846	0.0941835	0.00310781	0.631341		580.232	19.1461	3629.81	31.0382	723.842	231.343	9132.66
Kovdor	JA23A012	ok	371.902	13.7535	0.08999	0.0288485		0.0201252	1.05353	0.339576	29.3389	1735.03	13.3184	7137.21	5.18265e+14		11.1123	0.320574	0.332803	0.0126445		4.12936	0.196992	0.08999	0.00259608	0.604726		555.478	16.0247	3630.04	29.094	811.164	266.385	12783.4
Kovdor	MY14A009	ok	398.085	14.2888	0.0967413	0.0288701		0.00688281	0.756978	0.247821	24.4731	1462.08	8.49258	6111.91	4.64154e+14		10.3368	0.298425	0.335449	0.0116796		4.47445	0.20238	0.0967413	0.00279293	0.638293		595.283	17.1859	3642.16	26.6396	760.039	249.256	9915.4
Kovdor	NO05A080	ok	390.374	7.63434	0.0949866	0.0157007		0.0218685	0.928945	0.307932	28.9017	1867.05	10.9269	6213.77	5.81224e+14		10.5278	0.165294	0.336067	0.00567208		4.40139	0.101459	0.0949866	0.00149136	0.681114		584.961	9.18431	3644.98	12.9109	2717.98	905.088	36956.1
Kovdor	OC02B007	ok	360.225	15.2678	0.0877835	0.0334324		0.0329283	1.00816	0.312212	25.5736	1523.68	13.0152	7011.91	4.42297e+14		11.3917	0.38085	0.336592	0.0142031		4.07398	0.219326	0.0877835	0.00293481	0.621007		542.415	18.1342	3647.37	32.2737	773.849	237.353	10537.6
Kovdor	DE05B021	ok	375.356	11.5304	0.0917213	0.0249576		0.0263451	0.862638	0.285807	25.438	1548.21	10.9704	6903.18	4.65647e+14		10.9026	0.272103	0.338256	0.00950512		4.27777	0.160773	0.0917213	0.00228914	0.66406		565.709	14.1187	3654.91	21.4811	1426.92	469.095	19340.4
Kovdor	OC02B025	ok	383.172	17.9225	0.0960744	0.0359029											10.4086	0.373699	0.352387	0.0160153		4.66798	0.270362	0.0960744	0.00344935	0.619889		591.362	21.2316	3717.35	34.5954	600.251	208.119	7550.23
Kovdor	MA19a016	ok	380.469	13.5751	0.0955682	0.0276027		0.00370725	0.865417	0.296582	25.2817	1490.17	10.1535	6623.62	4.53841e+14		10.4637	0.288827	0.353316	0.0118172		4.65563	0.201894	0.0955682	0.00263794	0.636511		588.385	16.241	3721.36	25.4529	887.732	300.038	10368.8
Kovdor	MY14A175	ok	390.723	33.8072	0.112118	0.0647566		1.12581e-07	0.679073	0.260843	22.5869	1190	6.24252	6100.48	3.69839e+14		8.91918	0.577576	0.4215	0.0273019		6.51589	0.596799	0.112118	0.00726038	0.707016		685.036	44.3606	3987.6	48.4572	607.109	230.62	6364.5
Kovdor	MA19a069	ok	375.816	21.4338	0.113101	0.0393956		0.00674045	0.708324	0.302777	23.275	1298.31	6.83174	7046.71	3.87978e+14		8.84164	0.348321	0.443521	0.0182096		6.91644	0.393549	0.113101	0.00445569	0.692358		690.734	27.2118	4063.62	30.5736	632.508	267.491	6052.23
Kovdor	SE24A056	ok	388.984	13.2011	0.122326	0.0222826		0.0209423	0.577574	0.261662	22.9199	1341.17	5.13117	6357.86	4.12454e+14		8.1749	0.182158	0.464212	0.010079		7.82951	0.243588	0.122326	0.00272574	0.716217		743.935	16.5768	4131.39	16.1035	1196.43	541.745	10652.3
Kovdor	OC30C105	ok	388.138	8.8321	0.0765518	0.021246		0.0245972	1.535	0.31247	38.2556	2308.24	22.6849	7146.62	7.26389e+14		13.0631	0.277538	0.208429	0.00581962		2.19996	0.0771867	0.0765518	0.00162642	0.605549		475.508	10.1026	2893.37	22.6494	1802.9	370.849	33359.6
Kovdor	OC30C128	ok	395.161	12.1855	0.0786734	0.0292478		0.0124367	1.43216	0.300718	37.5099	2318.3	21.1939	7154.23	740785591243365		12.7108	0.371763	0.214561	0.00726357		2.32745	0.104125	0.0786734	0.00230103	0.653761		488.199	14.2788	2940.32	27.3488	1873.36	399.211	34731.5
Kovdor	OC30C151	ok	390.935	6.84197	0.0710558	0.0169156		0.00528638	1.90357	0.282301	42.4308	2587.65	29.8568	7459.87	8.26071e+14		14.0735	0.238061	0.151913	0.00384586		1.48831	0.0453155	0.0710558	0.00120195	0.555566		442.513	7.48538	2367.57	21.5963	2188.47	330.816	43028.9
Kovdor	OC30C175	ok	382.647	6.11637	0.0695605	0.0154986		0.0229955	2.13131	0.322055	42.7683	2594.2	34.6261	8093.17	8.16455e+14		14.376	0.222808	0.152234	0.00334265		1.46008	0.0392414	0.0695605	0.00107809	0.576667		433.507	6.71876	2371.18	18.7238	2482.4	384.09	50588.1
Kovdor	OC30C176	ok	379.811	6.27225	0.0713029	0.0157942		0.0190581	2.30816	0.397576	43.4066	2622.37	36.5862	8663.5	8.21157e+14		14.0247	0.221508	0.175012	0.00370518		1.72058	0.0454465	0.0713029	0.00112617	0.597961		444.001	7.01264	2606.16	17.6341	2654.87	468.338	52787
Kovdor	OC30C177	ok	379.795	6.48897	0.0703776	0.0165735		0.0199005	2.03684	0.338681	43.3916	2625.22	32.7298	7999.52	8.17043e+14		14.2091	0.235493	0.165905	0.00344277		1.60989	0.0427547	0.0703776	0.0011664	0.624059		438.43	7.26631	2516.75	17.4363	2371.46	403.918	47801.9
Kovdor	JA05B250	ok	392.924	6.46284	0.080974	0.0152741		0.0202356	1.64319	0.390256	51.0139	2788.48	23.0612	7400.86	8.82714e+14		12.3496	0.18863	0.237043	0.00375176		2.64652	0.0582115	0.080974	0.00123681	0.694421		501.934	7.66661	3100.23	25.2296	3113.65	748.489	55747.1
Kovdor	JA05B273	ok	406.808	6.85626	0.0831946	0.0154025		0.0106259	1.54388	0.355064	46.7139	2553.34	21.2226	7150.09	8.37304e+14		12.02	0.185138	0.231951	0.00435936		2.66068	0.064653	0.0831946	0.0012814	0.633861		515.163	7.93478	3065.56	30.0453	3198.76	744.82	56651.3
Kovdor	JA05B295	ok	399.492	8.448	0.085881	0.0191721		0.0173297	1.10295	0.286446	36.1159	2021.07	14.9839	6213.98	6.48268e+14		11.644	0.22324	0.263582	0.00542413		3.12114	0.0877838	0.085881	0.00164652	0.681661		531.131	10.1829	3268.24	32.365	2549.7	670.578	44974.3
Kovdor	JA05B317	ok	382.629	5.96334	0.0734255	0.0147734		0.0222662	1.57456	0.295543	40.1757	2223.29	23.9161	6777.77	6.9228e+14		13.6192	0.201202	0.190061	0.00355806		1.92416	0.0458869	0.0734255	0.00108474	0.619488		456.76	6.74788	2742.69	30.787	3717.56	706.764	73793.5
Kovdor	JA05B322	ok	373.476	5.23607	0.0720159	0.0133153		0.0236991	1.69024	0.324413	40.8674	2246.69	25.9325	6558.1	684866627768014		13.8858	0.184895	0.193516	0.003004		1.92152	0.0392984	0.0720159	0.000958917	0.651065		448.289	5.96913	2772.27	25.4595	4094.93	796.099	82214.8
Kovdor	JA05B323	ok	387.442	5.66571	0.0759393	0.0136963		0.00963269	1.42126	0.287758	40.3538	2212.97	20.742	6127.33	6.93834e+14		13.1684	0.180358	0.204275	0.00342557		2.13886	0.0463102	0.0759393	0.00104008	0.632569		471.839	6.46243	2860.66	27.285	3422.81	701.959	65385.6
Kovdor	JA05B324	ok	371.972	5.12746	0.0731154	0.0128617		0.00768927	1.635	0.341125	40.8887	2286.12	24.7126	6800.18	6.91957e+14		13.677	0.17591	0.206433	0.00319763		2.08109	0.0418997	0.0731154	0.000940389	0.638819		454.897	5.85076	2877.75	25.165	4032.68	852.252	79804.7
Kovdor	JA05B340	ok	381.827	8.29684	0.0893254	0.0186209		0.0228412	0.854178	0.263471	35.6805	1970.49	10.3353	6219.41	5.98319e+14		11.195	0.208462	0.313867	0.00590039		3.86564	0.102286	0.0893254	0.00166332	0.703733		551.546	10.2703	3540.04	28.9733	2191.94	684.924	34860.8
Kovdor	Ap19D401	ok	382.855	8.83519	0.0724481	0.0215458		0.00714792	1.9299	0.343749	41.625	2494.08	30.3086	8571.38	7.81539e+14		13.803	0.297397	0.180457	0.00625443		1.80261	0.0735646	0.0724481	0.00156095	0.527955		450.888	9.71475	2657.08	28.7283	1674.33	294.511	26696.5
Kovdor	AP19E024	ok	395.378	9.51017	0.0753608	0.0226333		0.0236056	1.90365	0.34589	39.2234	2318.46	28.1376	8499.64	7.50489e+14		13.2695	0.300333	0.185186	0.00621981		1.92423	0.0779332	0.0753608	0.00170567	0.558832		468.372	10.6008	2699.88	27.7277	1656.44	298.637	24605.4
Kovdor	Ap19D400	ok	385.629	10.0621	0.0767219	0.0234958		0.0221305	1.60933	0.336472	38.5876	2283.84	23.7317	8018.75	7.15684e+14		13.0341	0.306247	0.214239	0.00788634		2.2663	0.0989704	0.0767219	0.00180264	0.538026		476.526	11.1964	2937.88	29.7446	1411.04	291.338	21126.8
Kovdor	AP19E050	ok	392.325	10.3577	0.0781538	0.0242112		0.0299432	1.49647	0.31179	41.9265	2523.53	21.7708	8735.25	7.988e+14		12.7953	0.30979	0.214983	0.00741031		2.31662	0.0975822	0.0781538	0.0018922	0.57478		485.093	11.7447	2943.49	27.8389	1314.06	271.272	19176.1
Kovdor	Ap19D418	ok	375.68	10.817	0.0768468	0.0262254		0.0438331	1.5204	0.341174	41.5949	2464	22.4748	8880.51	7.48062e+14		13.0129	0.341268	0.232462	0.00804141		2.46308	0.106922	0.0768468	0.00201533	0.604136		477.274	12.5167	3069.07	27.6423	1348.73	298.893	20220.5
Kovdor	AP19E049	ok	368.387	11.1392	0.0796244	0.0256496		0.0014655	1.25263	0.31811	36.416	2182.6	17.8412	8365.26	6.47079e+14		12.559	0.322132	0.267075	0.00991121		2.93211	0.132273	0.0796244	0.00204233	0.568578		493.881	12.6678	3288.93	29.1358	1099.62	276.705	15711.4
Kovdor	AP19E023	ok	382.062	12.1926	0.084742	0.0273438		0.0168448	1.00929	0.276968	35.0193	2095.9	13.4308	5860.74	6.39926e+14		11.8005	0.322672	0.282668	0.00996782		3.30275	0.147378	0.084742	0.00231717	0.612777		524.365	14.3381	3377.73	27.4989	874.861	238.229	11700.8
Kovdor	AP19E041	ok	374.626	12.7291	0.0832783	0.0290816		0.00888487	1.15822	0.316582	36.912	2225.76	15.6874	8635.12	6.68011e+14		12.0079	0.34921	0.284014	0.0106361		3.26116	0.154628	0.0832783	0.00242186	0.613343		515.661	14.9962	3385.14	29.1871	997.3	270.222	13557.9
Kovdor	Ap19D430	ok	381.958	13.4595	0.0856441	0.0304832		0.00977262	1.01164	0.286669	33.2076	1957.75	13.331	7463.4	5.9859e+14		11.6762	0.355929	0.289144	0.0106653		3.41439	0.163385	0.0856441	0.00261071	0.637035		529.724	16.1477	3413.01	28.6883	937.898	262.482	12525.4
Kovdor	Ap19D429	ok	394.396	17.3851	0.0993275	0.0349217		0.0195315	0.776158	0.264134	24.8784	1447.04	8.86206	6065.74	4.55683e+14		10.0677	0.351582	0.354939	0.0143264		4.86099	0.259446	0.0993275	0.00346868	0.654293		610.466	21.3185	3728.33	30.702	725.696	243.901	8397.75

## Sheet: McClureMountain
			207 cor 206Pb/238U		206Pb/238U			Pb204	Pb206	Pb207	Pb208	Th232	U238	140Ce	Radiation dose		Data for Tera-Wasserburg plot						Data for Wetherill plot					206Pb/238U		207Pb/206Pb		Pb206	Pb207	U238
	File ID	Comment	age	+/-1 ster	ratio	+/-1 RSE		ppm	ppm	ppm	ppm	ppm	ppm	ppm	decays / mg		238U/206Pb	1 std. error	207Pb/206Pb	1 std. error		207Pb/235U	1 std. error	206Pb/238U	1 std. error	Rho		age	+/-1 std err	age	+/-1 ster	raw cps	raw cps	raw cps
McCLure Mountain	MY15B088	line at 3um/sec	494.879	10.3504	0.115124	0.0179302		0.0149824	1.01953	0.309284	1.25628	27.445	10.2459	2737.05	2.78306e+13		8.68632	0.155747	0.311148	0.00596372		4.93892	0.129628	0.115124	0.00206419	0.683156		702.435	12.5948	3526.62	14.7842	3092.39	940.537	37894.6
McCLure Mountain	MY15B100	line at 3um/sec	488.742	9.59225	0.109616	0.0168597		0.0139743	0.942533	0.266149	1.05714	24.4605	9.94089	2054.46	2.58295e+13		9.12275	0.153807	0.289277	0.00582536		4.37209	0.114827	0.109616	0.0018481	0.641944		670.518	11.3048	3413.73	15.6615	2886.8	816.945	36974.3
McCLure Mountain	MY15B101	line at 3um/sec	497.393	9.44251	0.109855	0.016332		0.00825257	0.925151	0.253582	1.07829	24.802	9.71378	1966.19	2.60517e+13		9.10293	0.148669	0.279872	0.00574011		4.23915	0.111142	0.109855	0.00179415	0.62293		671.905	10.9736	3362.22	16.0125	2881.8	791.598	36732.3
McCLure Mountain	MY15B118	line at 3um/sec	498.755	9.77879	0.115301	0.0162606		0.0180798	0.927733	0.27962	1.15859	26.3627	9.29484	1880.09	2.60219e+13		8.67295	0.141027	0.307462	0.00608208		4.88794	0.125165	0.115301	0.00187486	0.635006		703.461	11.4387	3508.23	15.2786	2916.15	880.322	35265.2
McCLure Mountain	MY15B119	line at 3um/sec	502.668	8.88307	0.111525	0.0155106		0.0163567	0.901748	0.250614	1.00489	23.8743	9.3266	2231.19	2.53121e+13		8.96658	0.139077	0.282657	0.00488087		4.34644	0.100886	0.111525	0.00172983	0.668241		681.6	10.572	3377.67	13.4658	2812.5	782.863	35099.7
McCLure Mountain	MY15B122	line at 3um/sec	514.983	10.1386	0.121724	0.0160312		0.0163258	1.03766	0.326588	1.28726	26.7722	9.84535	2633.43	2.80299e+13		8.21529	0.131701	0.320613	0.00617194		5.38095	0.134801	0.121724	0.00195139	0.639928		740.481	11.8708	3572.78	14.8002	3204.66	1010.08	36651.9
McCLure Mountain	SE18C004	ok	504.322	13.5794	0.0920011	0.0260362		0.00859377	1.6173	0.236922	1.53132	53.2219	20.6762	2596.67	5.64219e+13		10.8694	0.282999	0.151741	0.00643071		1.92485	0.095739	0.0920011	0.00239536	0.523464		567.361	14.7719	2365.64	36.1594	1245.58	181.205	16543
McCLure Mountain	SE18C005	ok	508.181	20.4178	0.117387	0.0347703		0.0192776	0.933925	0.272074	1.03503	23.8232	9.32363	2370.39	2.55746e+13		8.51881	0.296202	0.307028	0.0123664		4.96936	0.264418	0.117387	0.00408159	0.653459		715.508	24.8784	3506.05	31.1139	704.656	203.83	7310.59
McCLure Mountain	SE18C035	ok	496.8	15.7242	0.106769	0.0276185		0.00918741	1.16961	0.295586	1.35029	33.5158	12.4843	2529.36	3.40759e+13		9.36599	0.258675	0.262871	0.0101626		3.86982	0.183862	0.106769	0.00294881	0.581299		653.958	18.0614	3264	30.4112	941.797	235.403	10530.1
McCLure Mountain	SE18C036	ok	493.337	21.6958	0.104772	0.039361		1.24085e-07	0.754641	0.177622	0.868636	23.9654	8.17264	2878.63	2.29252e+13		9.54454	0.375683	0.255365	0.0134162		3.68899	0.242169	0.104772	0.00412393	0.59959		642.314	25.2821	3218.34	41.4764	610.938	142.206	6932.14
McCLure Mountain	NO12B454	ok	495.519	8.74246	0.101269	0.0165033		0.0156594	1.4987	0.337371	1.76715	48.1748	16.2925	2825.54	4.60656e+13		9.87473	0.162966	0.230492	0.0042508		3.21833	0.0796484	0.101269	0.00167127	0.666847		621.839	10.2624	3055.46	14.7537	2839.59	643.617	39287.7
McCLure Mountain	NO12B481	ok	499.148	9.73958	0.114804	0.0167162		0.0209275	0.909553	0.272191	1.16124	26.0982	8.7242	2284.99	2.49714e+13		8.71053	0.145607	0.304425	0.005595		4.81878	0.119717	0.114804	0.00191908	0.672851		700.585	11.7111	3492.89	14.2109	1823.67	549.665	22278
McCLure Mountain	NO12B508	ok	492.794	13.02	0.122482	0.0222112		0.00989011	0.770443	0.266138	1.02694	19.7958	6.91465	2390.62	1.91896e+13		8.16446	0.181342	0.349095	0.00753277		5.89545	0.182564	0.122482	0.00272047	0.717256		744.834	16.5436	3703.05	16.4412	1488.78	518.117	17029.3
McCLure Mountain	NO12B613	ok	506.933	8.59125	0.0994913	0.0159502		0.0178899	1.17719	0.233475	1.16376	32.1679	12.993	3226.5	3.5141e+13		10.0511	0.160317	0.203212	0.00424937		2.78763	0.0733142	0.0994913	0.00158691	0.606476		611.427	9.75238	2852.17	17.0247	2340.35	468.164	33011.6
McCLure Mountain	NO05A005	ok	491.4	9.10676	0.107355	0.0168112		0.0211892	1.04597	0.286317	1.31295	33.139	10.7561	2606.94	3.06618e+13		9.31493	0.156595	0.273148	0.00464748		4.04315	0.0967074	0.107355	0.00180476	0.702845		657.366	11.0511	3324.19	13.3221	2817.88	782.433	33632.2
McCLure Mountain	NO05A031	ok	506.191	8.45141	0.112382	0.0147185		0.0207959	1.13909	0.321203	1.32517	28.4856	11.1933	2742.82	3.0533e+13		8.8982	0.130968	0.283063	0.00444915		4.38614	0.0944483	0.112382	0.0016541	0.683521		686.568	10.1052	3379.91	12.255	3090.3	880.837	35193.3
McCLure Mountain	NO05A057	ok	510.593	6.91678	0.0949966	0.0131456		3.52506e-08	1.69681	0.280868	1.34982	39.743	19.8739	2878.15	5.03856e+13		10.5267	0.138379	0.165799	0.00284752		2.17166	0.0469687	0.0949966	0.00124878	0.607803		585.02	7.69041	2515.68	14.4323	4804.77	801.233	65128.6
McCLure Mountain	NO05A081	ok	512.602	7.63147	0.11551	0.0132642		0.0361622	1.54112	0.451606	2.0879	49.9025	15.0011	3176.65	4.61468e+13		8.65723	0.114831	0.292144	0.00343906		4.65286	0.0825163	0.11551	0.00153215	0.74793		704.67	9.34689	3429.06	9.14476	4597.32	1353.18	51725.1
McCLure Mountain	NO05A082	ok	500.304	8.00082	0.112342	0.014111		0.0259428	1.28149	0.366611	1.71757	42.7148	12.7735	2611.1	3.84064e+13		8.90139	0.125608	0.289996	0.0040402		4.49195	0.0890742	0.112342	0.00158526	0.711608		686.335	9.68487	3417.59	10.832	3844.63	1104.64	44293.1
McCLure Mountain	NO05A083	ok	509.276	9.57824	0.10769	0.0173346		0.000822017	0.732601	0.182842	0.800471	18.9059	7.5844	2313.4	2.06623e+13		9.28591	0.160968	0.25249	0.00471525		3.74905	0.0955268	0.10769	0.00186677	0.680315		659.319	11.429	3200.45	14.7642	2190.99	549.125	26215.7
McCLure Mountain	MY08A166	ok	506.32	6.19103	0.0911593	0.0119825		0.0189868	2.22649	0.315912	2.55073	92.0492	27.0498	3228.54	8.29723e+13		10.9698	0.131446	0.142069	0.00243664		1.78567	0.0373603	0.0911593	0.00109232	0.572715		562.39	6.73885	2252.58	14.8098	4931.2	700.09	68092.3
McCLure Mountain	MY08A167	ok	509.423	5.95522	0.0917826	0.0113821		0.00623107	2.41668	0.342941	2.82743	101.219	29.1922	3183.69	9.08587e+13		10.8953	0.124012	0.142506	0.00249881		1.80342	0.0377004	0.0917826	0.00104468	0.54447		566.071	6.4431	2257.88	15.1323	5267.83	747.965	72297.2
McCLure Mountain	MY08A168	ok	509.763	8.71047	0.101969	0.0157716		0.00640282	1.16682	0.24968	1.37819	39.1729	12.6812	3177.13	3.7589e+13		9.80689	0.15467	0.216056	0.00463382		3.03764	0.0808679	0.101969	0.00160821	0.592427		625.938	9.87204	2951.53	17.3098	2584.51	553.352	31902.1
McCLure Mountain	MY08A169	ok	516.12	8.24282	0.0999336	0.0151242		0.0147091	1.3129	0.253371	1.48405	43.5767	14.5437	3210.9	4.31231e+13		10.0066	0.151342	0.193761	0.00392387		2.66981	0.0674804	0.0999336	0.00151141	0.598375		614.02	9.28654	2774.35	16.6036	2896.87	559.359	36433
McCLure Mountain	MY08A170	ok	513.559	6.59817	0.094206	0.0124497		0.0140392	2.04349	0.313351	2.32906	79.9941	24.2396	3156.79	7.44539e+13		10.615	0.132154	0.155536	0.00281657		2.02028	0.0443967	0.094206	0.00117284	0.566526		580.364	7.22536	2407.7	15.384	4477.77	686.989	60280.6
McCLure Mountain	MY08A171	ok	515.343	7.63735	0.102053	0.0135027		0.00648259	1.16331	0.241774	1.4248	39.3918	12.6237	3145.03	3.80021e+13		9.7988	0.13231	0.209183	0.00425887		2.94344	0.0719088	0.102053	0.00137799	0.552706		626.431	8.4585	2899.23	16.5068	2551.87	530.637	31416.2
McCLure Mountain	MY08A172	ok	507.97	7.08538	0.0956705	0.0131838		0.0126937	1.34566	0.232277	1.50396	46.7104	15.5153	3155.89	4.53398e+13		10.4525	0.137804	0.174553	0.00357354		2.30253	0.0560674	0.0956705	0.0012613	0.54142		588.986	7.76505	2601.78	17.0596	2917.78	503.895	38152.3
McCLure Mountain	MY08A173	ok	522.44	5.96897	0.0930066	0.0111378		0.023518	1.88414	0.251259	2.12039	75.4093	22.3893	3028.43	7.06222e+13		10.7519	0.119752	0.133282	0.00249785		1.70917	0.0372615	0.0930066	0.00103588	0.510884		573.294	6.38521	2141.65	16.3802	4149.34	553.602	55897.2
McCLure Mountain	MY08A174	ok	514.033	7.45834	0.0982693	0.0137737		0.0066317	1.24562	0.227072	1.30829	39.8476	13.9469	3217.31	4.0402e+13		10.1761	0.140162	0.184938	0.00353048		2.5058	0.0589871	0.0982693	0.00135353	0.58511		604.258	8.32285	2697.66	15.7632	2774.22	505.965	35201.2
McCLure Mountain	MY08A175	ok	516.686	6.78076	0.0954437	0.0124569		0.00349061	1.43272	0.22917	1.56445	51.3369	16.6207	3083.51	4.9957e+13		10.4774	0.130516	0.160512	0.00338346		2.1123	0.0517193	0.0954437	0.00118894	0.508762		587.652	7.32034	2461.06	17.8105	3172.96	507.76	41698.2
McCLure Mountain	MY08A176	ok	516.127	7.66525	0.10565	0.0136899		0.0284176	1.56275	0.359471	1.56001	36.5636	16.3352	3471.58	4.34501e+13		9.46521	0.129578	0.231318	0.00375052		3.36961	0.071504	0.10565	0.00144634	0.645135		647.436	8.86336	3061.19	12.9647	3495.35	804.367	41374.2
McCLure Mountain	MY08A177	ok	516.635	6.05626	0.099967	0.0111155		0.0174887	2.16233	0.41952	2.18021	65.4066	23.9153	3594.54	6.84647e+13		10.0033	0.111192	0.193293	0.00262895		2.66424	0.0467981	0.099967	0.00111118	0.632812		614.215	6.82732	2770.38	11.1553	4856.27	942.576	60799.9
McCLure Mountain	MY08A178	ok	511.67	7.86398	0.106338	0.0141043		0.00959785	1.56915	0.376435	1.61201	36.9033	16.263	3543.39	4.30702e+13		9.40396	0.132637	0.241292	0.00386814		3.5378	0.0755404	0.106338	0.00149983	0.660551		651.446	9.18821	3128.51	12.7476	3563.81	855.295	41796.2
McCLure Mountain	DE09A007	ok	511.096	13.0128	0.100397	0.0233409		0.0165952	1.08495	0.214459	1.08392	29.9777	12.0147		3.28644e+13		9.96048	0.232486	0.203746	0.00762664		2.8204	0.124416	0.100397	0.00234335	0.529115		616.734	14.3951	2856.44	30.4637	1212.39	245.617	16830.4
McCLure Mountain	DE09A059	ok	527.986	14.1714	0.116873	0.0237449		0.0159098	1.07233	0.295258	1.25508	25.145	10.0333		2.84324e+13		8.5563	0.203168	0.281198	0.00794232		4.53136	0.167205	0.116873	0.00277514	0.643501		712.54	16.9192	3369.6	22.039	1209.11	341.921	14169.7
McCLure Mountain	DE09A135	ok	503.725	12.8588	0.106133	0.0236376		8.90355e-08	1.21767	0.299522	1.3716	34.4079	12.4213		3.48107e+13		9.42212	0.222716	0.250223	0.006624		3.66168	0.129952	0.106133	0.00250873	0.66604		650.252	15.3704	3186.18	20.9525	1355.49	343.479	17297
McCLure Mountain	DE09A162	ok	505.613	10.3677	0.110194	0.0179609		0.0307721	1.76363	0.471275	2.20437	49.5069	17.1938		4.91135e+13		9.07492	0.162994	0.2716	0.0061125		4.12656	0.11882	0.110194	0.00197918	0.623774		673.873	12.1034	3315.29	17.6335	2000.27	551.222	24383.4
McCLure Mountain	DE09A225	ok	518.543	12.071	0.0962095	0.0223824		8.70057e-08	1.2975	0.208055	1.22325	36.5313	14.5868		4.05585e+13		10.394	0.232642	0.163639	0.00570665		2.17073	0.0899512	0.0962095	0.0021534	0.540139		592.157	13.2539	2493.61	29.3697	1472.75	244.152	20681.3
McCLure Mountain	Ap19D379	ok	534.79	19.6689	0.114272	0.0330321		0.00576241	1.05713	0.26247	1.18915	28.1063	10.5513	2144.59	3.09949e+13		8.75102	0.289064	0.258995	0.0110945		4.08069	0.220738	0.114272	0.00377465	0.610649		697.513	23.0403	3240.6	33.7586	932.143	228.54	9458.01
McCLure Mountain	Ap19D380	ok	529.137	17.0008	0.112334	0.0289044		1.16867e-07	1.11739	0.274773	1.31661	31.2989	11.3378	2505.06	3.3393e+13		8.90199	0.257306	0.25489	0.00961748		3.94791	0.187646	0.112334	0.00324696	0.608122		686.291	19.8368	3215.4	29.7949	982.259	238.522	10131.4
McCLure Mountain	Ap19D393	ok	496.276	18.7658	0.114445	0.0327838		0.0305663	0.920818	0.270894	1.09961	25.8375	9.20262	1998.22	2.55292e+13		8.73782	0.286459	0.305988	0.0115122		4.82839	0.240949	0.114445	0.00375194	0.656956		698.512	22.8999	3500.8	29.0742	809.78	235.254	8220.44
McCLure Mountain	Ap19D394	ok	534.491	19.9636	0.106993	0.0348853		1.14586e-07	0.897558	0.187706	0.91448	23.4934	9.69362	2104.68	2.74876e+13		9.34636	0.326051	0.216202	0.0102987		3.18946	0.188315	0.106993	0.0037325	0.590847		655.264	22.8591	2952.62	38.4417	797.584	164.717	8749.13
McCLure Mountain	Ap19D395	ok	509.347	14.4972	0.11562	0.0242531		0.0272808	1.48345	0.422626	1.7207	37.7087	14.7242	2589.27	4.05185e+13		8.64906	0.209767	0.29657	0.00906163		4.7278	0.184433	0.11562	0.00280414	0.62171		705.302	17.1058	3452.4	23.6953	1310.7	368.753	13213
McCLure Mountain	AP19E004	ok	492.161	19.6746	0.115684	0.0330417		0.0289935	0.848856	0.252863	0.97188	18.8422	8.3195	2067.1	2.11483e+13		8.64422	0.28562	0.317215	0.0133319		5.05975	0.2705	0.115684	0.0038224	0.61805		705.675	23.3167	3556.39	32.3493	740.261	219.075	7303.17
McCLure Mountain	AP19E005	ok	504.738	15.1209	0.102162	0.0273452		1.17352e-07	1.34345	0.29091	1.49141	41.3905	14.8551	3127.88	4.18129e+13		9.78837	0.267665	0.224002	0.00886505		3.15532	0.151784	0.102162	0.00279364	0.56846		627.067	17.1473	3009.68	31.7824	1159.64	249.453	12906.4
McCLure Mountain	AP19E018	ok	501.911	18.5231	0.110497	0.032464		0.0163011	0.979729	0.258163	1.26606	31.6796	9.92239	2144.21	2.93454e+13		9.05004	0.2938	0.277878	0.0113772		4.23356	0.22121	0.110497	0.00358717	0.621301		675.632	21.9337	3351.05	31.9923	843.115	220.519	8585.31
McCLure Mountain	AP19E019	ok	506.409	15.6333	0.100555	0.0285717		0.00983818	1.01422	0.208405	1.13479	30.9515	11.3636	2144.91	3.18142e+13		9.94485	0.284141	0.21114	0.00881536		2.92735	0.148099	0.100555	0.00287301	0.564752		617.658	17.6475	2914.32	33.8058	885.938	180.686	9979.51
McCLure Mountain	AP19E020	ok	509.636	13.2332	0.105352	0.0240667		0.0342497	1.91998	0.448706	2.3838	67.386	20.3934	3151.28	6.21785e+13		9.49201	0.228442	0.237835	0.00692145		3.45477	0.130466	0.105352	0.00253548	0.637292		645.696	15.5398	3105.54	23.1849	1623.82	376.636	17338.8
McCLure Mountain	DE09A007	ok	509.608	12.9845	0.100094	0.0233617		0.0166071	1.08625	0.214678	1.08545	29.9986	12.022		3.27862e+13		9.99064	0.233398	0.203697	0.00762417		2.8112	0.124034	0.100094	0.00233836	0.529486		614.958	14.3664	2856.05	30.4623	1212.39	245.617	16830.4
McCLure Mountain	DE09A059	ok	528.958	14.1567	0.117088	0.023657		0.0159101	1.07235	0.295264	1.25512	25.1454	10.0335		2.84872e+13		8.54057	0.202044	0.281197	0.00794116		4.53968	0.167241	0.117088	0.00276995	0.642155		713.782	16.8859	3369.59	22.0359	1209.11	341.921	14169.7
McCLure Mountain	DE09A135	ok	506.209	12.9045	0.106674	0.0236012		8.89457e-08	1.21563	0.299095	1.3689	34.3743	12.4107		3.49568e+13		9.37434	0.221246	0.250309	0.00662522		3.68161	0.130559	0.106674	0.00251764	0.665529		653.404	15.4211	3186.72	20.9483	1355.49	343.479	17297
McCLure Mountain	DE09A162	ok	508.039	10.4447	0.110747	0.018027		0.03073	1.75961	0.470362	2.19847	49.441	17.1737		4.92968e+13		9.0296	0.162777	0.271728	0.00611401		4.14922	0.119628	0.110747	0.00199644	0.625258		677.084	12.2058	3316.02	17.6286	2000.27	551.222	24383.4
McCLure Mountain	DE09A225	ok	519.595	12.1304	0.0964246	0.0224545		8.68135e-08	1.29271	0.207406	1.21797	36.4526	14.5592		4.05632e+13		10.3708	0.232871	0.163764	0.00571046		2.17724	0.0903	0.0964246	0.00216517	0.541406		593.422	13.325	2494.89	29.3633	1472.75	244.152	20681.3
McCLure Mountain	SE24A006	ok	523.551	8.50512	0.105527	0.0152335		0.00387846	1.40727	0.309019	1.53026	39.7442	15.8382	3211.65	4.45119e+13		9.47629	0.144357	0.220966	0.00394907		3.21506	0.0754999	0.105527	0.00160753	0.648696		646.716	9.85171	2987.74	14.3793	2742.58	608.218	32676.8
McCLure Mountain	SE24A030	ok	496.162	12.2333	0.115209	0.0212602		0.0217473	0.838598	0.252554	0.988034	21.8514	8.26557	2097.03	2.23999e+13		8.67987	0.184535	0.310064	0.00719179		4.92537	0.154972	0.115209	0.00244936	0.675698		702.929	14.9444	3521.24	17.8979	1722.61	521.335	17514.7
McCLure Mountain	SE24A055	ok	514.568	6.90216	0.0950501	0.012968		0.00668792	1.78532	0.282351	1.44892	43.8088	20.6536	3479.52	5.37923e+13		10.5208	0.136434	0.160543	0.00298329		2.104	0.0476768	0.0950501	0.00123261	0.572287		585.335	7.59065	2461.39	15.7005	3693.08	583.886	42865.2
McCLure Mountain	SE24A080	ok	515.305	9.44768	0.120729	0.014995		0.0162431	1.45714	0.45352	1.88883	41.2084	12.7747	2782.54	3.89946e+13		8.28303	0.124204	0.315431	0.00566958		5.25069	0.122906	0.120729	0.00181033	0.640603		734.757	11.0177	3547.7	13.8434	3018.31	934.209	25800.2
McCLure Mountain	SE24A104	ok	528.277	10.7446	0.131757	0.0165207		0.0304717	1.2586	0.439974	1.6736	30.4265	9.85502	2579.12	3.03049e+13		7.58974	0.125388	0.351522	0.00590399		6.38597	0.150446	0.131757	0.00217671	0.70125		797.88	13.1815	3713.61	12.7881	2560.47	885.601	19002.3
McCLure Mountain	SE24A129	ok	498.752	9.23723	0.0997057	0.017475		0.0204843	0.968999	0.205513	1.00138	25.481	9.79385	2741.78	2.65254e+13		10.0295	0.175266	0.2158	0.00446117		2.96669	0.0803057	0.0997057	0.00174236	0.64557		612.684	10.7067	2949.61	16.6874	1978.52	412.976	18385.5
McCLure Mountain	SE24A177	ok	482.387	9.49568	0.0972347	0.0180875		0.000345478	0.894764	0.196024	0.916015	23.1929	9.29471	2681.3	2.39467e+13		10.2844	0.186019	0.22154	0.00543611		2.97012	0.0905406	0.0972347	0.00175873	0.593348		598.183	10.8196	2991.92	19.7356	1871.13	399.288	16808.2
McCLure Mountain	SE24A281	ok	489.633	10.1318	0.101936	0.0190631		0.00188679	0.769409	0.183518	0.766576	19.5117	8.85807	2154.96	2.21874e+13		9.81008	0.187011	0.242629	0.00540713		3.41014	0.100008	0.101936	0.00194322	0.650028		625.744	11.9286	3137.3	17.7084	1659.13	376.747	14243.8
McCLure Mountain	OC02B031	ok	515.848	17.426	0.114042	0.0286472											8.76872	0.251199	0.280436	0.0114031		4.4096	0.219333	0.114042	0.00326697	0.57594		696.178	19.9435	3365.36	31.7383	901.844	239.349	9380.98
McCLure Mountain	OC02B032	ok	472.34	18.6704	0.101735	0.0339917											9.82942	0.334119	0.264378	0.0131948		3.7085	0.223937	0.101735	0.00345816	0.562919		624.571	21.2302	3272.98	39.2325	649.914	159.338	7604.29
McCLure Mountain	OC02B033	ok	504.826	11.4756	0.0926478	0.022049											10.7936	0.237987	0.156088	0.0052044		1.99392	0.0797041	0.0926478	0.00204279	0.551589		571.178	12.5939	2413.72	28.3082	1584.28	243.684	20304.9
McCLure Mountain	OC02B034	ok	509.417	12.0594	0.0897761	0.0233507											11.1388	0.2601	0.12608	0.00477507		1.56066	0.0694388	0.0897761	0.00209634	0.524815		554.213	12.9413	2044.01	33.4688	1559.4	195.193	20736.9
McCLure Mountain	MY05A007	ok	497.472	10.5826	0.102835	0.0190634		0.0151822	1.01324	0.237821	1.11196	30.0735	10.8562	2030.69	3.00338e+13		9.72433	0.185379	0.237943	0.00637617		3.37377	0.11095	0.102835	0.00196038	0.57968		631.001	12.029	3106.26	21.3474	1644.83	386.949	21453.7
McCLure Mountain	MY05A030	ok	511.824	11.4282	0.106483	0.0207216		0.0139705	1.22017	0.291855	1.46301	38.9246	12.7492	1738.86	3.77658e+13		9.39119	0.194601	0.241978	0.0057541		3.55269	0.112056	0.106483	0.0022065	0.656971		652.289	13.5165	3133.03	18.902	1951.54	467.717	24647.9
McCLure Mountain	MY05A057	ok	502.696	7.92083	0.0894841	0.0155286		0.0232165	1.82959	0.239046	2.04612	72.4489	22.9119	3460.95	6.75959e+13		11.1752	0.173535	0.133756	0.00307924		1.65029	0.045827	0.0894841	0.00138957	0.559207		552.485	8.57934	2147.86	20.1072	2971.28	388.837	44604.3
McCLure Mountain	MY05A107	ok	512.412	13.311	0.111943	0.0232271		0.0230682	0.822805	0.220955	0.940848	22.4641	8.36734	1721.09	2.35831e+13		8.93314	0.207491	0.273065	0.00747255		4.21467	0.151281	0.111943	0.00260011	0.647107		684.021	15.8878	3323.72	21.4275	1359.54	365.427	16320.2
McCLure Mountain	MY05A156	ok	543.584	10.5345	0.103358	0.0181046		0.00204506	1.1615	0.205011	1.22698	35.7713	12.7787	2530.28	3.89145e+13		9.67511	0.175164	0.180561	0.00552011		2.57317	0.0914263	0.103358	0.00187125	0.509549		634.058	11.4794	2658.03	25.3386	1910.73	337.346	24443.8
McCLure Mountain	MY05A204	ok	510.618	8.43769	0.0920673	0.016084		0.0129856	1.9233	0.272331	1.81191	59.3558	23.423	4360.91	6.4372e+13		10.8616	0.174698	0.143031	0.00369204		1.81567	0.0552214	0.0920673	0.00148081	0.528837		567.752	9.13171	2264.22	22.2613	3138.84	444.284	43798.8
McCLure Mountain	MY05A247	ok	489.648	11.4191	0.0987444	0.0218131		0.0106287	0.887576	0.194056	0.967477	27.4708	9.99327	2132.32	2.71155e+13		10.1272	0.220905	0.221756	0.00601352		3.01919	0.105074	0.0987444	0.00215392	0.626777		607.046	13.2416	2993.49	21.8076	1435.98	313.667	18281.7
McCLure Mountain	NO14A127	ok	501.746	14.8281	0.123481	0.0259782		0.0202194	1.15823	0.391138	1.65509	36.2414	10.2833		3.17366e+13		8.09839	0.210381	0.343666	0.00771626		5.85113	0.200907	0.123481	0.00320782	0.756577		750.57	19.4984	3679.15	17.1355	1571.26	531.968	16383.6
McCLure Mountain	NO14A128	ok	487.374	13.6024	0.103019	0.0260239		0.00940241	1.16174	0.292547	1.49274	41.7088	12.3637		3.63203e+13		9.70693	0.252613	0.252408	0.00697212		3.58527	0.136063	0.103019	0.00268096	0.685733		632.078	16.4492	3199.93	21.8388	1602.92	404.728	20032.3
McCLure Mountain	NO14A129	ok	509.813	11.7314	0.0949076	0.0223757		7.63649e-08	1.38866	0.223814	1.63728	55.1608	16.1543		4.99802e+13		10.5366	0.235763	0.166239	0.00505938		2.17538	0.0821742	0.0949076	0.00212362	0.592347		584.496	13.0785	2520.13	25.5638	1861.48	300.868	25426.3
McCLure Mountain	NO14A130	ok	490.113	11.614	0.0925847	0.023343		0.0106668	1.51917	0.265613	1.71679	57.1716	17.9425		5.17321e+13		10.8009	0.252126	0.177041	0.00432249		2.26003	0.0763407	0.0925847	0.0021612	0.691057		570.805	13.3243	2625.34	20.2989	2032.61	356.439	28185
McCLure Mountain	NO14A131	ok	504.168	16.8514	0.103461	0.0313916		0.00625242	0.842587	0.187151	0.941499	24.3208	8.90638		2.4845e+13		9.66546	0.303414	0.2331	0.00853635		3.32522	0.160389	0.103461	0.00324781	0.650817		634.661	19.923	3073.45	29.2527	1162.89	259.098	14430
McCLure Mountain	AU28A006	ok	511.543	11.3132	0.100274	0.0210875		0.027963	2.07836	0.410565	2.16077	64.9007	23.1397	3060.66	6.62121e+13		9.97263	0.210298	0.202307	0.0052914		2.79707	0.0939741	0.100274	0.00211454	0.627655		616.017	12.9903	2844.9	21.3081	1979.83	392.433	23397.2
McCLure Mountain	AU28A007	ok	488.219	14.974	0.124599	0.0254357		0.0427584	1.46571	0.522257	1.81065	31.4043	13.244	2569.54	3.39233e+13		8.02572	0.20414	0.363638	0.00892868		6.24721	0.22086	0.124599	0.00316928	0.71947		756.982	19.2544	3765.12	18.6312	1379.06	492.948	13226.3
McCLure Mountain	AU28A008	ok	521.733	17.0278	0.125599	0.0268819		0.00690817	1.28757	0.415566	1.60857	30.3081	11.4714	2693.7	3.27426e+13		7.96183	0.214029	0.331301	0.0106022		5.73735	0.239787	0.125599	0.00337634	0.643197		762.711	20.5031	3623.11	24.5172	1272.07	411.789	12029
McCLure Mountain	AU28A009	ok	503.516	17.4947	0.104993	0.0315002		0.0140886	0.830974	0.196938	0.829174	19.9386	8.74787	2289.44	2.28191e+13		9.5244	0.300021	0.243533	0.0102708		3.5255	0.185581	0.104993	0.00330731	0.598414		643.606	20.2737	3143.2	33.4961	785.828	186.757	8780.23
McCLure Mountain	DE05B006	ok	521.255	16.0274	0.117363	0.0261546		0.0135748	0.768193	0.217302	0.858442	17.1594	7.69105	3050.27	2.0646e+13		8.52059	0.222853	0.291644	0.0100404		4.71937	0.204043	0.117363	0.00306958	0.604938		715.366	18.7102	3426.4	26.7495	1308.13	366.999	13849.8
McCLure Mountain	DE05B022	ok	515.163	11.031	0.0958677	0.0204771		0.0133261	1.36717	0.222683	1.25698	39.4874	16.564	2599.28	4.49425e+13		10.431	0.213597	0.165853	0.00541066		2.19229	0.0844411	0.0958677	0.00196309	0.531633		590.147	12.0845	2516.22	27.413	2242	362.353	28964.4
McCLure Mountain	DE05B036	ok	519.031	10.7524	0.0965028	0.0196273		0.018742	1.11279	0.182253	1.07072	34.3776	13.3972	3829.27	3.76214e+13		10.3624	0.203386	0.165138	0.00558001		2.19729	0.0858632	0.0965028	0.00189409	0.502275		593.881	11.6563	2508.96	28.4139	1768.45	287.507	22849.2
McCLure Mountain	DE05B065	ok	503.399	12.82	0.102716	0.0234884		0.0284285	1.01545	0.23028	1.04193	27.4764	11.5036	4000.76	3.04937e+13		9.73559	0.228673	0.229356	0.00704562		3.24825	0.12561	0.102716	0.00241263	0.607406		630.306	14.8049	3047.56	24.5913	1618.21	364.516	19898.1
McCLure Mountain	MY29A042	ok	526.193	14.7336	0.119704	0.0246958		0.0299375	0.849657	0.250941	1.04255	22.7271	7.75276	3010.95	2.32464e+13		8.35391	0.206306	0.297914	0.0080986		4.91703	0.180587	0.119704	0.00295619	0.672415		728.862	17.9998	3459.41	21.0707	1638.31	482.73	17465.9
McCLure Mountain	MY29A041	ok	508.429	12.0268	0.125007	0.0186975		0.0121447	0.794864	0.267848	1.00317	18.6298	7.0661	2354.42	1.962e+13		7.99955	0.149572	0.34321	0.00767557		5.91556	0.172441	0.125007	0.00233733	0.641415		759.319	14.1974	3677.12	17.0701	1733.14	582.639	18003.7
McCLure Mountain	MY29A040	ok	514.1	10.1521	0.111973	0.0179582		0.0238683	0.966309	0.259468	1.04252	22.9672	9.59958	2139.86	2.60235e+13		8.93071	0.16038	0.271177	0.00507293		4.18666	0.108567	0.111973	0.00201084	0.69252		684.197	12.287	3312.84	14.6601	2102.34	563.162	24408.5
McCLure Mountain	MY29A039	ok	506.301	10.2923	0.112334	0.017894		0.0145622	0.948096	0.262449	1.03969	22.6695	9.26726	2233.06	2.49237e+13		8.90202	0.159293	0.282667	0.00577623		4.37813	0.118919	0.112334	0.00201011	0.658789		686.289	12.2805	3377.73	15.9353	2058.36	568.418	23517
McCLure Mountain	MY29A017	ok	527.886	8.90884	0.101459	0.0161685		0.00750125	1.38329	0.258729	1.56443	47.2123	15.1992	2374.38	4.68206e+13		9.85623	0.15936	0.18841	0.00391929		2.6357	0.0694414	0.101459	0.00164043	0.613686		622.952	10.0722	2728.34	17.1276	3037.24	566.46	39127.8
McCLure Mountain	MY29A018	ok	514.567	8.54336	0.101479	0.0155914		0.0152978	1.28249	0.261863	1.50395	43.1339	14.1247	2314.06	4.20764e+13		9.85421	0.153641	0.206388	0.00418391		2.88778	0.073853	0.101479	0.0015822	0.609649		623.073	9.71456	2877.39	16.4676	2831.04	576.411	36551.9
McCLure Mountain	MY29A019	ok	519.903	8.01765	0.0969975	0.0147744		0.0246652	1.34474	0.221456	1.45856	46.1401	15.4164	2463.61	4.60371e+13		10.3095	0.152317	0.167577	0.00372637		2.24118	0.0598338	0.0969975	0.00143308	0.5534		596.789	8.81718	2533.59	18.6533	2964.03	486.751	39829.4
McCLure Mountain	MY29A020	ok	514.731	7.28324	0.0946366	0.013624		0.0138611	1.55734	0.242709	1.74359	57.2051	18.3307	2666.37	5.51165e+13		10.5667	0.143962	0.157161	0.00332772		2.05071	0.0516336	0.0946366	0.00128933	0.5411		582.9	7.94145	2425.34	17.9556	3407.57	529.581	47006.3
McCLure Mountain	MY29A021	ok	503.521	7.37301	0.0944934	0.0138503		0.0433938	1.45594	0.24652	1.65625	51.6412	17.1162	2557.29	4.96084e+13		10.5828	0.146574	0.172107	0.00377811		2.24234	0.0582026	0.0944934	0.00130876	0.533601		582.057	8.06164	2578.24	18.3342	3155.05	532.732	43463.5
McCLure Mountain	OC30C104	ok	518.294	13.4476	0.103548	0.0241154		0.00270567	0.895613	0.188695	0.974628	26.82	9.76587	3584.69	2.80957e+13		9.65732	0.23289	0.21511	0.00716709		3.07118	0.126317	0.103548	0.00249711	0.586324		635.17	15.3174	2944.44	26.9071	1060.56	225.747	14479
McCLure Mountain	OC30C126	ok	513.397	12.8838	0.104066	0.0224883		0.0118015	0.928385	0.201994	0.908185	26.729	9.91665	3691.25	2.80477e+13		9.60926	0.216096	0.224863	0.0078886		3.22648	0.13445	0.104066	0.00234028	0.539666		638.195	14.3519	3015.84	28.1588	1057.74	233.473	14153.8
McCLure Mountain	OC30C149	ok	521.972	8.34882	0.0928071	0.0158547		0.00516289	2.24765	0.295098	2.03451	73.6264	27.2023	3333.33	7.83955e+13		10.775	0.170835	0.132361	0.00292259		1.69372	0.0460406	0.0928071	0.00147143	0.583258		572.117	9.07078	2129.52	19.3249	2621.98	350.755	39776.6
McCLure Mountain	OC30C171	ok	528.714	13.6153	0.112915	0.0239115		0.0237779	1.21222	0.304946	1.33109	30.1771	11.8687	2516.93	3.386e+13		8.8562	0.211765	0.2587	0.00653835		4.02763	0.140132	0.112915	0.00269998	0.687258		689.656	16.4907	3238.81	19.9206	1374.92	353.891	16883.9
McCLure Mountain	OC30C172	ok	521.016	15.1066	0.117635	0.0264678		0.0120756	0.984394	0.284507	1.14945	23.7098	9.42039	2517.86	2.63707e+13		8.50084	0.224999	0.293333	0.00746469		4.75774	0.17469	0.117635	0.00311355	0.72086		716.939	18.9758	3435.37	19.7596	1138.6	336.767	13666.6
McCLure Mountain	OC30C169	ok	528.44	13.3373	0.107095	0.0239782		0.0100732	0.978996	0.215458	1.02961	25.3757	10.2838	3280.08	2.90046e+13		9.33746	0.223895	0.224551	0.00602867		3.3158	0.119357	0.107095	0.00256795	0.666125		655.858	15.7263	3013.61	21.5536	1125.38	253.317	14826
McCLure Mountain	JA05B248	ok	504.033	6.74927	0.0926614	0.0130817		0.00530734	1.99	0.311186	1.9251	61.9652	24.3842	3973.03	6.61859e+13		10.792	0.141177	0.15735	0.00266714		2.01032	0.0430438	0.0926614	0.00121217	0.61097		571.258	7.47303	2427.38	28.742	3662.18	579.625	57191.9
McCLure Mountain	JA05B271	ok	517.986	9.74656	0.10875	0.0173984		0.0283025	1.04013	0.255286	1.13488	26.2965	10.9105	2864.37	2.98874e+13		9.19544	0.159986	0.247815	0.00472387		3.71583	0.0958994	0.10875	0.00189207	0.674141		665.482	11.5783	3170.86	30.2119	2155.19	535.538	29103.6
McCLure Mountain	JA05B293	ok	528.117	10.6509	0.111739	0.0187768		0.0272469	0.968426	0.240826	1.02038	23.69	9.90143	2741.66	2.76024e+13		8.94943	0.168041	0.252725	0.0049026		3.89363	0.10512	0.111739	0.0020981	0.695491		682.839	12.8215	3201.92	30.6695	2067.77	520.719	27432.1
McCLure Mountain	JA05B315	ok	516.908	11.5107	0.116837	0.0194756		0.0217689	0.75233	0.216834	0.864283	18.384	7.181	2375.48	2.00626e+13		8.55894	0.166691	0.294	0.00641716		4.73619	0.138546	0.116837	0.00227547	0.665772		712.332	13.8731	3438.9	33.8875	1736.47	506.911	21648.8
McCLure Mountain	JA05B339	ok	492.196	6.98277	0.105703	0.0128314		0.0359816	1.74009	0.452637	2.0423	49.1544	17.7535	2929.29	4.85662e+13		9.46042	0.121391	0.262441	0.00337559		3.82492	0.0694919	0.105703	0.00135633	0.706258		647.747	8.31152	3261.42	20.2399	4579.58	1206.78	61400.4

## Sheet: OD306
			207 cor 206Pb/238U		206Pb/238U			Pb204	Pb206	Pb207	Pb208	Th232	U238	140Ce	Radiation dose		Data for Tera-Wasserburg plot						Data for Wetherill plot						206Pb/238U		207Pb/206Pb		Pb206	Pb207	U238
	File ID	Comment	age	+/-1 ster	ratio	+/-1 RSE		ppm	ppm	ppm	ppm	ppm	ppm	ppm	decays / mg		238U/206Pb	1 std. error	207Pb/206Pb	1 std. error		207Pb/235U	1 std. error	206Pb/238U	1 std. error	Rho			age	+/-1 std err	age	+/-1 ster	raw cps	raw cps	raw cps
OD306	MY15B126	line at 3um/sec	1533.67	13.8332	0.270012	0.00919775		3.43068e-08	4.38233	0.436593	6.33736	91.0905	18.6467	7100.47	2.20811e+14		3.70354	0.0340643	0.0997999	0.00129966		3.71547	0.0592368	0.270012	0.0024835	0.576905			1540.86	14.1725	1620.36	12.1176	13310.6	1327.82	68179
OD306	MY15B084	line at 3um/sec	1527.72	13.6704	0.269523	0.00911295		0.00962603	4.65173	0.477829	6.5056	93.0316	19.7132	7304.57	2.28438e+14		3.71026	0.0338114	0.101687	0.00135522		3.77887	0.0610102	0.269523	0.00245615	0.56444			1538.38	14.0192	1655.14	12.3458	13543.4	1394.99	70080.8
OD306	MY15B085	line at 3um/sec	1533.29	13.3036	0.270801	0.0088439		0.00769127	4.9402	0.506474	6.54427	91.1087	20.8257	6923.07	2.33509e+14		3.69275	0.0326583	0.102516	0.00126745		3.82775	0.0581854	0.270801	0.00239494	0.581801			1544.87	13.6626	1670.17	11.4308	13971.1	1436.19	71889.3
OD306	MY15B103	line at 3um/sec	1531.1	14.7102	0.270416	0.00980408		3.48554e-08	3.95509	0.405137	4.40794	62.545	16.7016	5759.76	1.74078e+14		3.69801	0.0362556	0.102561	0.00134915		3.82399	0.0627371	0.270416	0.00265118	0.597585			1542.91	15.1268	1670.99	12.161	11786.6	1209.87	60381.7
OD306	MY15B112	line at 3um/sec	1537.91	12.6841	0.272008	0.00839105		0.0057323	4.62546	0.475782	5.42865	76.1394	19.4968	6383.36	2.08075e+14		3.67636	0.0308485	0.103665	0.00127542		3.88792	0.0578998	0.272008	0.00228243	0.563451			1550.99	13.0144	1690.76	11.3454	13997	1442.32	71356.9
OD306	MY15B097	line at 3um/sec	1527.05	13.4277	0.270158	0.0089615		0.0103361	4.54491	0.47404	5.38155	74.6699	19.2054	6365.18	2.02938e+14		3.70154	0.0331713	0.104085	0.00129697		3.8771	0.0595077	0.270158	0.00242102	0.583868			1541.6	13.8151	1698.2	11.4798	13588.3	1420.52	69800.9
OD306	MY15B102	line at 3um/sec	1517.89	13.3806	0.269272	0.00897483		3.46556e-08	4.3774	0.466211	6.39033	89.7481	18.5529	7061.72	2.16117e+14		3.71371	0.0333299	0.10658	0.00135098		3.95701	0.0614578	0.269272	0.00241667	0.577852			1537.11	13.7953	1741.72	11.6143	13118.6	1400.14	67475.2
OD306	MY15B125	line at 3um/sec	1527.91	14.2557	0.27312	0.00948891		4.424e-05	4.41795	0.499444	6.4777	90.8272	18.5857	6998.34	2.19213e+14		3.66139	0.0347426	0.11287	0.00145394		4.25043	0.0680034	0.27312	0.00259161	0.593086			1556.62	14.7706	1846.13	11.6521	13424.4	1519.67	68007.2
OD306	MY15B096	line at 3um/sec	1509.73	14.7549	0.26987	0.00990034		0.00589434	4.09159	0.455951	5.17699	73.6857	17.3237	6278.81	1.88379e+14		3.70549	0.0366856	0.113184	0.00171316		4.21153	0.0761714	0.26987	0.0026718	0.547392			1540.14	15.2479	1851.15	13.683	12186.6	1361.18	62744.7
OD306	MY15B113	line at 3um/sec	1512.69	15.2802	0.272703	0.010267		0.00823303	4.47394	0.533608	6.49593	90.3247	18.811	6924.19	2.17477e+14		3.667	0.037649	0.120291	0.00160152		4.52298	0.0760433	0.272703	0.00279983	0.61067			1554.51	15.9601	1960.54	11.8797	13400.8	1601.12	68124.2
OD306	AP24C088	4 J/cm2	1558.61	20.5449	0.274773	0.0133788		0.0134579	4.35856	0.432228	6.99445	97.3652	17.471	10511.6	2.25636e+14		3.63936	0.0486902	0.10051	0.00215877		3.8079	0.0963558	0.274773	0.00367613	0.528718			1564.99	20.9376	1633.54	19.9514	5721.46	558.182	22403.7
OD306	AP24C091	4 J/cm2	1542.57	19.9045	0.274581	0.013079		8.26161e-08	4.67103	0.511829	7.48513	103.127	18.5289	10876.5	2.36406e+14		3.64192	0.0476326	0.109039	0.00220247		4.12812	0.0993376	0.274581	0.00359124	0.543516			1564.01	20.4557	1783.42	18.4118	5788.55	622.835	22231
OD306	AP24C094	4 J/cm2	1523.03	21.1895	0.272219	0.0140248		0.010479	4.08214	0.460056	6.56273	91.3357	16.2014	9982.04	2.0523e+14		3.67351	0.0515204	0.112866	0.00270089		4.23625	0.117501	0.272219	0.00381783	0.505635			1552.06	21.7674	1846.06	21.6462	5294.14	584.799	20162
OD306	AP24C090	4 J/cm2	1532.94	21.4336	0.27526	0.0141339		0.0199764	4.62298	0.533775	7.60864	101.742	18.5224	10843.9	2.33035e+14		3.63293	0.0513476	0.116613	0.00254093		4.42581	0.114947	0.27526	0.0038905	0.544199			1567.44	22.1541	1904.95	19.5707	5736.9	650.838	22320.3
OD306	AP24C093	4 J/cm2	1505.96	21.4567	0.272107	0.0143119		0.0201537	6.349	0.769145	8.78388	114.544	24.1134	9794.71	2.75906e+14		3.67503	0.0525965	0.122314	0.00293611		4.589	0.12825	0.272107	0.00389435	0.512102			1551.49	22.2046	1990.26	21.3449	7362.42	874.74	26911.5
OD306	AP24C095	4 J/cm2	1556.09	40.8949	0.303736	0.0257642		0.0595114	5.15193	0.973234	8.6427	104.253	18.0676	11666	2.37363e+14		3.29234	0.0848245	0.185078	0.00675252		7.75089	0.346191	0.303736	0.00782551	0.576837			1709.81	44.0518	2698.91	30.1229	6393.83	1183.13	21452.3
OD306	AP24C092	4 J/cm2	1592.67	23.7513	0.316267	0.0144272		0.0360319	6.69945	1.32017	10.6301	120.697	22.9471	9244.33	2.9439e+14		3.16188	0.0456171	0.198596	0.00407222		8.66016	0.217127	0.316267	0.00456285	0.575433			1771.47	25.5574	2814.69	16.7504	6970.28	1347.91	23046
OD306	AP24C111	4 J/cm2	1561.54	21.5334	0.275156	0.0139642		8.09708e-08	4.08667	0.412125	3.99999	56.5262	17.3728	6273.06	1.74451e+14		3.6343	0.0507501	0.100044	0.00239506		3.79551	0.105193	0.275156	0.00384235	0.503848			1566.92	21.8809	1624.89	22.2633	5354.31	523.891	20770
OD306	AP24C108	4 J/cm2	1539.17	22.8949	0.272004	0.0151315		8.05804e-08	3.81196	0.395314	5.02453	69.6548	15.9193	6737.99	1.79272e+14		3.67642	0.0556297	0.102932	0.00231306		3.86036	0.104582	0.272004	0.00411582	0.558537			1550.96	23.4684	1677.66	20.7568	4992.29	503.193	19193.1
OD306	AP24C110	4 J/cm2	1527.51	20.1409	0.270196	0.0134021		8.02774e-08	4.1713	0.432853	4.28105	59.6349	17.7974	6482.91	1.76438e+14		3.70102	0.0496015	0.103942	0.00211912		3.87231	0.0944772	0.270196	0.00362119	0.549308			1541.8	20.6633	1695.67	18.7887	5502.76	554.347	21487
OD306	AP24C109	4 J/cm2	1536.35	30.7422	0.27641	0.0201373		0.00728386	3.5603	0.422825	4.62855	59.718	14.1836	6085.7	1.56519e+14		3.61781	0.0728529	0.118207	0.00397187		4.50503	0.176477	0.27641	0.00556615	0.514057			1573.26	31.6811	1929.29	30.0925	4301.38	496.212	15728.9
OD306	AP24C106	4 J/cm2	1525.41	19.4443	0.274507	0.0128233		0.00970706	4.28726	0.506686	4.55191	60.9408	17.4325	6587.39	1.7564e+14		3.6429	0.0467139	0.118586	0.00254999		4.48838	0.112373	0.274507	0.00352008	0.512184			1563.64	20.051	1935.03	19.2448	5520.11	634.833	20785.5
OD306	AP24C107	4 J/cm2	1535.15	23.8109	0.276384	0.0156513		0.0051231	3.03319	0.362803	2.9896	39.7823	12.375	5926.71	1.21305e+14		3.61815	0.0566288	0.118804	0.00291831		4.52737	0.131867	0.276384	0.00432578	0.537356			1573.13	24.6215	1938.32	21.9757	4034.96	469.362	15199.7
OD306	AP24C105	4 J/cm2	1569.19	20.1086	0.28394	0.0128546		0.00661988	5.21301	0.636222	5.77535	74.5911	20.6089	8853.05	2.17564e+14		3.52187	0.045272	0.122533	0.0026308		4.79713	0.120044	0.28394	0.00364993	0.513687			1611.18	20.7109	1993.43	19.0841	6856.65	814.782	25176.4
OD306	AP24C104	4 J/cm2	1500.58	21.4774	0.276359	0.0142537		0.00958283	5.0956	0.709044	5.63439	73.4924	20.4772	8937.64	2.04841e+14		3.61849	0.0515769	0.138314	0.00327808		5.27035	0.145759	0.276359	0.00393914	0.515387			1573	22.4211	2206.2	20.5679	6797.26	921.465	25445.3
OD306	AP24C064	Flow Restrictor	1493.62	25.2635	0.262702	0.0172195		1.18847e-07	4.21611	0.41339	6.75112	98.7799	17.7148	10908.9	2.18322e+14		3.80659	0.0655475	0.099709	0.00266794		3.6116	0.114918	0.262702	0.00452359	0.541166			1503.65	25.8921	1618.66	24.9032	3553.83	342.586	14693.9
OD306	AP24C059	Flow Restrictor	1500.7	24.5463	0.265279	0.0166128		1.17846e-07	4.34111	0.445602	7.01445	101.917	18.3634	10935.8	2.26924e+14		3.76961	0.0626239	0.103869	0.00273572		3.79919	0.118306	0.265279	0.00440704	0.533492			1516.8	25.1982	1694.38	24.2766	3699.1	373.612	15425.5
OD306	AP24C063	Flow Restrictor	1509.94	22.7815	0.267152	0.0152897		0.0115437	4.31151	0.438021	6.94222	99.374	17.7928	11025.5	2.22123e+14		3.74319	0.0572322	0.104462	0.00265465		3.84785	0.114118	0.267152	0.00408467	0.51554			1526.33	23.3371	1704.86	23.3925	3664.81	366.111	14887.9
OD306	AP24C060	Flow Restrictor	1473.22	21.7393	0.261188	0.0148517		1.18011e-07	4.3087	0.44926	7.13166	102.695	18.3263	10994.5	2.23055e+14		3.82865	0.0568622	0.106885	0.00302394		3.84923	0.122993	0.261188	0.0038791	0.464803			1495.92	22.217	1746.97	25.9052	3664.57	375.907	15359.7
OD306	AP24C057	Flow Restrictor	1589	28.1035	0.284277	0.0178737		0.0143843	4.43553	0.489386	7.1748	98.7692	17.6785	10612.3	2.33582e+14		3.51769	0.062874	0.112584	0.00313319		4.41287	0.145956	0.284277	0.00508108	0.540396			1612.87	28.8279	1841.54	25.1875	3754.49	407.736	14762.4
OD306	AP24C058	Flow Restrictor	1545.13	24.0221	0.278384	0.0157775		0.00037295	4.41803	0.521757	7.17596	99.8666	17.9716	10644.2	2.29521e+14		3.59216	0.0566752	0.11926	0.00254384		4.57761	0.12145	0.278384	0.00439219	0.594675			1583.22	24.9791	1945.16	19.0672	3851.18	447.593	15449
OD306	AP24C061	Flow Restrictor	1520.87	26.9639	0.279352	0.0174664		1.08623e-07	6.33326	0.88648	8.77409	120.765	25.6251	10514	2.95263e+14		3.57971	0.0625244	0.135811	0.00459442		5.23104	0.199158	0.279352	0.00487927	0.458766			1588.1	27.7383	2174.45	29.4607	5849.2	805.329	23313.7
OD306	AP24C062	Flow Restrictor	1582.8	23.3338	0.298549	0.0145255		0.0233818	6.47244	1.00735	9.10397	123.143	23.8991	10828	3.01238e+14		3.34953	0.0486537	0.156996	0.00365489		6.46256	0.177333	0.298549	0.00433659	0.529354			1684.11	24.4626	2423.56	19.7453	5604.85	857.907	20379.7
OD306	MA01G017	Flow Restrictor	1602.72	27.5039	0.282499	0.0173562		1.18888e-07	3.26413	0.322648	3.30932	46.9089	13.5254	5611.83	1.43607e+14		3.53983	0.0614382	0.0995992	0.00297355		3.87949	0.133973	0.282499	0.00490312	0.502589			1603.94	27.8383	1616.61	27.7938	2828.56	280.92	14053.1
OD306	MA01G004	Flow Restrictor	1585.31	26.9476	0.279578	0.0171053		0.0135732	3.75154	0.375629	4.02973	59.1546	15.6048	6173.1	1.70044e+14		3.57682	0.0611827	0.100351	0.00333618		3.86835	0.144628	0.279578	0.00478228	0.457515			1589.24	27.1845	1630.6	30.8938	3144.8	316.574	15678.7
OD306	MA01G019	Flow Restrictor	1602.53	29.1246	0.283907	0.0183498		0.00267979	3.76302	0.38509	4.33387	61.9227	15.404	6523.22	1.74448e+14		3.52229	0.0646331	0.103987	0.00327442		4.07058	0.148353	0.283907	0.00520962	0.503489			1611.01	29.5616	1696.47	29.0164	3275.76	336.785	16079
OD306	MA01G005	Flow Restrictor	1589.22	26.8769	0.282186	0.0170491		0.0137234	3.83801	0.402932	4.53163	63.7154	15.8626	6496.92	1.77899e+14		3.54376	0.0604178	0.106147	0.00317957		4.12993	0.142345	0.282186	0.00481102	0.494655			1602.36	27.3188	1734.26	27.4717	3248.07	342.816	16090.7
OD306	MA01G008	Flow Restrictor	1622.61	34.3639	0.288334	0.0214316		0.0257682	2.79792	0.294765	2.69366	38.2714	11.3783	5419.25	1.2096e+14		3.4682	0.074329	0.106267	0.00353478		4.22468	0.167169	0.288334	0.00617944	0.541615			1633.2	35.002	1736.33	30.4982	2251.83	238.463	10977.3
OD306	MA01G018	Flow Restrictor	1576.68	27.2489	0.284123	0.0174307		0.0185259	3.75947	0.445994	4.52547	61.9186	15.4037	6431.15	1.71279e+14		3.51961	0.0613494	0.118931	0.00321083		4.6591	0.149723	0.284123	0.00495247	0.542414			1612.09	28.1	1940.23	24.1472	3297.53	393.03	16200.3
OD306	MA01G009	Flow Restrictor	1587.59	47.1591	0.287165	0.0297586		0.000853335	1.27401	0.154303	1.2213	17.0248	5.23672	4024.86	5.35609e+13		3.48232	0.103629	0.121951	0.00620842		4.82857	0.284735	0.287165	0.00854565	0.504651			1627.35	48.4277	1984.97	45.2962	1032.04	125.638	5085.25
OD306	MA01G024	Flow Restrictor	1597.8	33.559	0.292889	0.0209129		0.0148727	2.43201	0.308423	2.31886	29.9441	9.53045	4459.43	9.68563e+13		3.41426	0.0714021	0.133049	0.00473446		5.37301	0.221768	0.292889	0.00612516	0.506678			1655.95	34.6307	2138.6	31.1119	2008.37	255.821	9438.39
OD306	AP24C074	Flow Restrictor	1526.41	22.3828	0.268577	0.0149136		1.15908e-07	4.926	0.485371	5.12098	73.9923	20.631	9037.97	2.10303e+14		3.72333	0.0555281	0.0994339	0.00232511		3.68217	0.102123	0.268577	0.00400544	0.537726			1533.57	22.8711	1613.52	21.7777	4238.25	409.938	17407.8
OD306	AP24C079	Flow Restrictor	1566.33	24.681	0.275974	0.0159872		0.0166186	4.03482	0.400476	3.99054	56.8248	17.0453	6229.83	1.73468e+14		3.62353	0.05793	0.0998733	0.00259055		3.80031	0.115793	0.275974	0.00441204	0.524695			1571.05	25.1167	1621.72	24.1314	3617	352.154	14960.8
OD306	AP24C075	Flow Restrictor	1546.48	25.0785	0.272726	0.0164477		0.0172299	4.09767	0.408796	4.12595	58.5757	16.9446	6450.14	1.72561e+14		3.66669	0.0603086	0.101013	0.00273276		3.79844	0.120262	0.272726	0.00448571	0.519494			1554.62	25.57	1642.81	25.1006	3575.79	350.13	14496.3
OD306	AP24C078	Flow Restrictor	1559.77	26.6216	0.27546	0.0173385		0.0108949	3.97461	0.402568	4.64734	65.9001	16.6274	7157.91	1.81489e+14		3.6303	0.0629439	0.101997	0.00271866		3.87387	0.123179	0.27546	0.00477606	0.545278			1568.46	27.1947	1660.77	24.6735	3434.33	341.258	14071.5
OD306	AP24C077	Flow Restrictor	1558.89	26.7413	0.275763	0.017348		1.14797e-07	3.41495	0.351764	4.24318	60.1239	14.2108	6329.27	1.5976e+14		3.62631	0.0629093	0.103436	0.00307542		3.93285	0.135383	0.275763	0.00478394	0.503958			1569.99	27.2362	1686.67	27.4322	2962.75	299.448	12079.2
OD306	AP24C073	Flow Restrictor	1512.85	24.6285	0.2686	0.0165421		1.11499e-07	4.93258	0.531297	5.2839	74.3298	20.6548	9038.7	2.08754e+14		3.72301	0.0615864	0.107372	0.00266095		3.97646	0.118484	0.2686	0.0044432	0.555174			1533.69	25.3704	1755.28	22.6688	4413.69	466.748	18131.1
OD306	AP24C076	Flow Restrictor	1552.33	26.7856	0.277099	0.0174552		1.15046e-07	3.61038	0.403536	3.88255	52.3441	14.8068	5957.79	1.52873e+14		3.60882	0.0629929	0.111277	0.00306806		4.25148	0.138736	0.277099	0.00483683	0.534907			1576.73	27.5223	1820.37	25.0181	3126.88	342.976	12568
OD306	AP24C080	Flow Restrictor	1581.4	38.4332	0.287418	0.024338		0.00191437	3.87985	0.479446	3.89039	51.3973	15.552	5581.22	1.59423e+14		3.47925	0.084678	0.126088	0.00510647		4.99677	0.236095	0.287418	0.00699517	0.515094			1628.61	39.6372	2044.13	35.7888	3246.71	393.493	12738
OD306	MY29A074	Hi U and Th	1613.59	30.1964	0.283928	0.0189911		4.83353e-08	1.21329	0.120371	1.42037	18.7685	4.71033	2814.4	5.35432e+13		3.52202	0.066887	0.0979393	0.00291603		3.83413	0.135402	0.283928	0.0053921	0.537764			1611.11	30.5968	1585.25	27.8313	2600.89	257.596	11745.6
OD306	MY08A100	lowest common Pb	1565.06	27.3479	0.287811	0.0173587		0.027044	4.42365	0.601783	6.32521	85.2431	17.8112	7560.77	2.13515e+14		3.4745	0.060313	0.136182	0.00408611		5.40417	0.187331	0.287811	0.00499604	0.500768			1630.58	28.3048	2179.2	26.1161	10348.2	1410.04	48550.2
OD306	Ma01B012	No N2	1542.42	31.2945	0.271665	0.0205154		1.51783e-07	3.60465	0.355869	3.90109	55.0829	14.8028	6074.94	1.55133e+14		3.681	0.0755174	0.0999976	0.00369898		3.74563	0.158436	0.271665	0.00557333	0.485012			1549.25	31.7835	1624.04	34.4036	2389.31	236.579	12294.5
OD306	Ma01B013	No N2	1556.8	30.7207	0.27497	0.0199087		0.0100602	3.74282	0.382941	4.36701	61.4103	15.2169	6325.35	1.6711e+14		3.63676	0.0724031	0.102155	0.00373798		3.87299	0.161336	0.27497	0.00547429	0.477924			1565.98	31.1766	1663.64	33.8593	2470.47	253.577	12585.4
OD306	Ma01B024	No N2	1547.76	30.6163	0.275044	0.0199535		1.57602e-07	3.62216	0.397492	3.81028	54.2538	14.5235	6040.9	1.53059e+14		3.63578	0.0725464	0.107523	0.00376499		4.07759	0.164335	0.275044	0.0054881	0.4951			1566.36	31.2543	1757.85	32.0189	2320.99	256.308	11662.6
OD306	Ma01B018	No N2	1520.82	32.228	0.271305	0.0214437		0.0113556	3.72546	0.413579	4.44312	61.3825	15.1317	6301.31	1.62267e+14		3.68588	0.0790391	0.111282	0.00381503		4.16279	0.16833	0.271305	0.0058178	0.530303			1547.42	33.1826	1820.46	31.1075	2375.63	264.948	12091.3
OD306	Ma01B006	No N2	1526.09	30.2203	0.272539	0.019976		1.53789e-07	3.35882	0.372431	3.56037	50.4371	14.1055	6201.76	1.43566e+14		3.6692	0.0732959	0.112109	0.00379499		4.2128	0.165586	0.272539	0.00544425	0.508225			1553.68	31.0363	1833.88	30.6654	2193.19	243.486	11539.9
OD306	Ma01B025	No N2	1538.73	31.1091	0.277484	0.0203241		1.55392e-07	3.36223	0.401441	3.44314	47.8572	13.3744	5676.3	1.37434e+14		3.60381	0.0732443	0.120132	0.00407951		4.59617	0.181898	0.277484	0.00563961	0.513547			1578.68	32.0852	1958.18	30.3094	2185.76	262.691	10896
OD306	Ma01B028	No N2	1549.46	36.0521	0.281448	0.0233159		0.0193512	2.94878	0.364624	3.0328	40.8668	11.5568	5686.74	1.19085e+14		3.55306	0.0828427	0.126059	0.00490544		4.89185	0.221915	0.281448	0.0065622	0.51397			1598.65	37.2739	2043.72	34.3893	1945.92	242.402	9557.73
OD306	Ma01B007	No N2	1558.32	38.6576	0.291774	0.0244721		0.0180531	2.98066	0.450726	3.19306	39.1215	11.4532	5432.49	1.17057e+14		3.42731	0.0838734	0.151201	0.00621475		6.08279	0.290978	0.291774	0.00714032	0.511581			1650.39	40.3884	2359.56	35.0921	1942.07	294.121	9349.98
OD306	Ma01B017	No N2	1537	31.6361	0.287896	0.0204763		0.0244521	3.7526	0.567348	4.62432	58.6433	14.4626	6056.66	156906966198938		3.47348	0.0711241	0.151783	0.00469505		6.02505	0.223504	0.287896	0.00589504	0.551983			1631.01	33.397	2366.11	26.3913	2416.34	366.908	11669.5
OD306	JA17A102	ok	1508	21.0345	0.263498	0.0141827		0.00729681	5.12122	0.481218	5.33941	77.0546	21.3254	9418.45	2.15133e+14		3.7951	0.0538247	0.0938122	0.00226749		3.40829	0.0955152	0.263498	0.0037371	0.506085			1507.71	21.3834	1504.34	22.8363	4585.59	443.234	24018
OD306	JA17A122	ok	1502.13	22.8142	0.263987	0.0154122		0.0136786	4.98689	0.495957	5.22265	72.8775	20.8164	9084.66	2.06275e+14		3.78806	0.0583822	0.0988597	0.00260715		3.59835	0.109914	0.263987	0.00406861	0.504563			1510.21	23.2756	1602.72	24.5956	4442.89	454.329	23475
OD306	JA17A147	ok	1519.96	23.9336	0.270601	0.0159745		0.0123777	4.60221	0.50022	4.85482	69.2723	18.8251	6787.69	1.93121e+14		3.69548	0.0590334	0.109573	0.00266897		4.08823	0.119085	0.270601	0.00432271	0.548408			1543.85	24.6622	1792.33	22.1783	4268.39	476.816	22254.5
OD306	JA17A227	ok	1543.97	22.1277	0.275405	0.0144928		1.04519e-07	4.64733	0.514423	5.01772	70.0873	19.0803	8603.29	1.99059e+14		3.63101	0.0526234	0.110794	0.00258202		4.20715	0.11546	0.275405	0.00399138	0.528092			1568.18	22.7273	1812.47	21.167	4456.82	506.453	23725.3
OD306	JA17A103	ok	1483.62	23.9201	0.265663	0.0163551		0.0277629	4.91765	0.563163	5.03691	69.8296	20.2645	8848.11	1.96715e+14		3.76417	0.0615635	0.115102	0.00278042		4.21613	0.122993	0.265663	0.00434495	0.560643			1518.75	24.8394	1881.48	21.7575	4430.52	521.906	22971.8
OD306	JA17A194	ok	1558.05	24.4461	0.307323	0.0151606		0.0468203	5.24612	1.01981	6.29155	71.0183	19.108	8510.39	2.02428e+14		3.25391	0.0493314	0.19345	0.00439044		8.19719	0.223729	0.307323	0.00465921	0.555469			1727.52	26.1903	2771.72	18.6123	5031.15	1004.45	23612
OD306	Jl14C068	ok	1501.86	25.8421	0.265206	0.0173401		9.14965e-08	3.82724	0.389937	3.35943	47.3785	16.379	5875.5	1.50305e+14		3.77065	0.0653836	0.102958	0.00342372		3.76482	0.141193	0.265206	0.00459871	0.462365			1516.42	26.295	1678.12	30.7141	4245.52	433.775	18894.4
OD306	Jl14C136	ok	1603.62	27.288	0.285387	0.0173007		0.0147713	4.37983	0.470836	4.52246	59.5674	17.5115	7164.68	1.84548e+14		3.50401	0.0606219	0.107856	0.00251195		4.24406	0.123131	0.285387	0.0049374	0.596318			1618.44	28.0001	1763.51	21.2815	4168.98	449.211	17099.6
OD306	Jl14C069	ok	1511.75	22.6767	0.26895	0.0151693		9.7022e-08	4.30642	0.466534	5.31286	74.5422	17.9744	7190.25	1.93436e+14		3.71817	0.0564022	0.109118	0.00275461		4.04641	0.119172	0.26895	0.00407979	0.515065			1535.47	23.292	1784.75	23.0069	4505.12	489.434	19549.4
OD306	Jl14C137	ok	1542.92	23.6137	0.276004	0.0155335		0.00821496	5.11984	0.579444	5.57707	77.3078	21.196	8564.07	2.20282e+14		3.62314	0.0562802	0.113236	0.0025136		4.30924	0.116751	0.276004	0.00428732	0.573339			1571.2	24.4064	1851.98	20.0649	5369.56	609.117	22801.2
OD306	Jl14C099	ok	1512.69	27.9636	0.270651	0.0186574		9.17493e-08	4.51714	0.51318	4.87567	68.9349	19.6135	6534.15	1.96213e+14		3.6948	0.0689353	0.113919	0.00352344		4.25114	0.153556	0.270651	0.00504964	0.516524			1544.1	28.809	1862.84	27.9208	5000.08	569.502	22419.6
OD306	Jl14C177	ok	1599.62	40.9298	0.287721	0.0258001		0.0167655	2.47888	0.290739	2.47326	32.2061	9.38516	4628.41	9.89888e+13		3.47559	0.0896707	0.117006	0.00472013		4.64173	0.222273	0.287721	0.00742324	0.538785			1630.13	42.0576	1910.98	36.2073	2500.86	293.939	9657.37
OD306	Jl14C178	ok	1583.55	54.83	0.313218	0.034272		0.0108886	2.39757	0.466567	2.61043	25.2807	8.35879	4281.91	8.28436e+13		3.19267	0.109419	0.195498	0.00798821		8.44287	0.450265	0.313218	0.0107346	0.64263			1756.52	60.1994	2788.98	33.4567	2421.49	472.216	8609.59
OD306	Ap19D423	ok	1524.97	22.3723	0.268612	0.0149302		1.14422e-07	6.04552	0.606675	8.42046	119.971	25.4631	11369.4	2.9424e+14		3.72285	0.0555828	0.100378	0.00228211		3.71762	0.101116	0.268612	0.00401042	0.54892			1533.75	22.8992	1631.1	21.1257	5277.5	523.034	22537.1
OD306	Ap19D398	ok	1554.61	21.9544	0.275183	0.014256		0.0205562	6.24867	0.641712	8.5866	122.338	25.8864	11641.7	3.06077e+14		3.63395	0.0518054	0.104062	0.00264176		3.94834	0.114957	0.275183	0.003923	0.489637			1567.06	22.3399	1697.79	23.3893	5456.99	553.423	22956.1
OD306	Ap19D434	ok	1503.5	20.7123	0.266393	0.0139593		0.0108035	6.09504	0.640458	8.77937	124.958	25.7941	11581.8	2.97525e+14		3.75385	0.0524013	0.105798	0.00243391		3.88599	0.104569	0.266393	0.00371867	0.518757			1522.47	21.2526	1728.22	21.1144	5409.11	561.348	23192.7
OD306	Ap19D422	ok	1525.31	20.5747	0.270663	0.0136437		0.0069454	5.99598	0.639855	8.28019	118.712	25.174	11367.2	2.91097e+14		3.69463	0.0504082	0.106683	0.00245282		3.98131	0.106441	0.270663	0.00369284	0.510328			1544.17	21.0681	1743.5	21.0615	5241.52	552.403	22313.5
OD306	Ap19D421	ok	1544.31	23.1769	0.274492	0.0152311		0.00819147	6.56163	0.708463	9.22399	129.159	27.2576	11140.4	3.20333e+14		3.64309	0.0554884	0.107772	0.00247956		4.07886	0.112544	0.274492	0.00418083	0.55201			1563.56	23.8149	1762.09	21.0272	5845.35	623.294	24622.6
OD306	AP24C014	ok	1560.46	22.1867	0.277554	0.014364		1.14712e-07	4.34207	0.462898	6.95248	99.299	17.706	10626.9	2.29752e+14		3.6029	0.051752	0.108087	0.00259705		4.13641	0.115792	0.277554	0.00398678	0.513118			1579.03	22.6812	1767.42	21.9448	3831.9	402.792	16001.8
OD306	Ap19D432	ok	1551.31	20.744	0.27597	0.0135137		0.00359476	6.06196	0.653718	8.753	123.589	24.8202	11412.3	3.00588e+14		3.62359	0.0489681	0.108373	0.00243707		4.12369	0.108188	0.27597	0.00372937	0.515087			1571.03	21.2305	1772.25	20.5263	5498.98	585.666	22814.7
OD306	Ap19D397	ok	1562.94	21.5505	0.27822	0.0139466		0.0210126	6.21397	0.667741	8.64223	123.041	25.5357	11700.8	3.06689e+14		3.59428	0.0501278	0.108736	0.00244514		4.17122	0.110373	0.27822	0.00388021	0.527067			1582.39	22.0689	1778.35	20.5102	5407.57	573.841	22566.7
OD306	AP24C011	ok	1528.2	21.6572	0.2727	0.0143577		0.0332948	5.92798	0.651505	8.29139	115.067	24.5338	8925.6	2.83525e+14		3.66703	0.0526502	0.111401	0.00246627		4.18868	0.110526	0.2727	0.00391536	0.544125			1554.49	22.319	1822.4	20.0835	4984.79	540.591	21178.3
OD306	AP24C013	ok	1547.23	24.8216	0.284344	0.0159282		0.0126796	4.52757	0.623602	7.36414	99.3139	18.0902	10616.1	2.29882e+14		3.51687	0.0560173	0.135871	0.00379241		5.32686	0.171189	0.284344	0.00452908	0.495635			1613.2	25.6954	2175.22	24.3052	3966.77	538.85	16244.2
OD306	AP24C012	ok	1518.32	27.506	0.279185	0.0182698		0.0102466	6.32942	0.882737	9.11601	123.208	25.516	11045.8	297048870433594		3.58186	0.06544	0.136745	0.00341416		5.26385	0.162853	0.279185	0.00510066	0.590531			1587.26	28.9989	2186.38	21.7146	5351.87	736.33	22130.4
OD306	AP24C010	ok	1557.58	23.5611	0.286805	0.0152114		0.0201491	4.7438	0.642987	6.84277	91.1252	18.5755	7776.24	2.24265e+14		3.48668	0.0530375	0.13736	0.00294284		5.43185	0.142723	0.286805	0.00436272	0.578926			1625.55	24.7269	2194.18	18.6172	4092.07	547.444	16462.3
OD306	Ap19D433	ok	1594	31.9734	0.296287	0.0199928		1.25898e-07	6.91834	0.979575	10.3612	134.762	25.4025	10761.2	327662203467523		3.37511	0.0674777	0.144735	0.00441143		5.91274	0.215527	0.296287	0.00592359	0.548479			1672.87	33.4453	2284.64	26.2283	5451.31	762.303	20280.8
OD306	Ap19D435	ok	1548.52	35.134	0.316194	0.0221526		0.0150394	4.07804	0.912001	26.467	496.131	14.9058	9414.55	7.03183e+14		3.16261	0.0700602	0.220784	0.00574944		9.62551	0.329084	0.316194	0.00700454	0.647951			1771.12	39.2349	2986.42	20.9543	3801.56	839.651	14077.3
OD306	AP24C009	ok	1582	26.4099	0.329957	0.0161558		0.0621414	6.13838	1.43836	13.8304	171.921	20.912	9892.46	344775739300068		3.03069	0.0489634	0.237202	0.004292		10.7914	0.261769	0.329957	0.00533074	0.666021			1838.17	29.6973	3101.29	14.4204	4459.85	1031.72	15622.3
OD306	Ma01D007	ok	1583.07	29.1088	0.277257	0.0185412		0.000473907	2.92187	0.270362	2.83718	41.0101	12.0437	5607.08	1.25138e+14		3.60676	0.0668735	0.0944139	0.00347987		3.60928	0.148913	0.277257	0.00514068	0.449391			1577.53	29.2493	1516.41	34.767	2500.89	231.349	12482.2
OD306	Ma01D024	ok	1531.53	23.9575	0.268964	0.0158018		0.0294033	3.18617	0.312185	3.46535	49.1046	13.0943	5608.26	1.36606e+14		3.71797	0.0587506	0.0976998	0.00293727		3.62317	0.123058	0.268964	0.00425011	0.465251			1535.54	24.2643	1580.67	28.1196	2880.22	282.328	14383.1
OD306	Ma01D025	ok	1599.87	30.9722	0.281917	0.0196196		0.0432503	3.58415	0.349579	3.96671	55.2606	14.2086	5821.25	1.58228e+14		3.54715	0.0695934	0.0994049	0.00318589		3.86394	0.145199	0.281917	0.00553108	0.522102			1601.01	31.4111	1612.97	29.8508	2820.4	275.214	13588.5
OD306	Ma01D012	ok	1530.43	28.565	0.26944	0.0188918		1.27966e-07	3.8026	0.379998	4.15294	59.7408	15.9592	6376.48	1.66228e+14		3.7114	0.0701151	0.0998552	0.00335035		3.70966	0.142841	0.26944	0.00509021	0.490632			1537.96	29.0549	1621.39	31.2161	3074.83	307.255	15642.5
OD306	Ma01D028	ok	1538.99	31.1503	0.271401	0.0205942		0.0132363	2.77572	0.280049	2.77867	39.3969	11.3443	5456.7	1.15122e+14		3.68458	0.0758808	0.101138	0.00313234		3.78468	0.140763	0.271401	0.00558928	0.553712			1547.91	31.8779	1645.11	28.7266	2506.65	253.049	12457.9
OD306	Ma01D013	ok	1525.67	28.0219	0.274379	0.0185997		0.000268007	3.92664	0.458882	4.66902	65.7656	16.0724	6654.85	1.73661e+14		3.6446	0.0677883	0.11804	0.00322079		4.46562	0.147463	0.274379	0.00510335	0.563252			1562.99	29.0711	1926.77	24.4437	3108.13	363.224	15424.2
OD306	Ma01D006	ok	1595.66	29.2924	0.287698	0.0183447		0.00749473	3.55196	0.418522	3.80279	52.0988	14.1591	6023.99	1.53412e+14		3.47587	0.0637639	0.119107	0.00398009		4.7247	0.180108	0.287698	0.00527773	0.481231			1630.01	29.9021	1942.87	29.879	3066.1	361.165	14796.6
OD306	Ma01D017	ok	1513.56	26.6447	0.276567	0.0175085		0.0161821	3.52818	0.457315	4.13192	56.8553	14.3806	6140.19	1.51598e+14		3.61576	0.0633067	0.131585	0.00413484		5.01775	0.180498	0.276567	0.00484228	0.486729			1574.05	27.5593	2119.23	27.5334	3082.39	399.592	15244.5
OD306	Ma01D026	ok	1515.62	29.4866	0.280655	0.0193306		1.13963e-07	2.86052	0.399036	3.54116	45.8763	11.3034	4690.28	1.20779e+14		3.56309	0.0688767	0.142609	0.00457143		5.51852	0.206575	0.280655	0.00542523	0.516405			1594.66	30.8257	2259.13	27.66	2626.37	366.557	12615.4
OD306	Ma01D018	ok	1628.79	29.0685	0.304764	0.0177879		0.0375769	3.91448	0.592401	4.76939	59.1897	14.3194	6001.38	1.67291e+14		3.28123	0.0583663	0.14985	0.00383696		6.29683	0.19632	0.304764	0.00542112	0.570536			1714.89	30.5043	2344.22	21.896	3180.67	481.441	14120.9
OD306	AU28A031	ok	1505.34	28.73	0.264198	0.0192998		9.59678e-08	4.08598	0.396274	4.19825	59.2286	17.1628	8140.2	1.69445e+14		3.78504	0.0730506	0.0976534	0.00355249		3.55728	0.146493	0.264198	0.00509897	0.468657			1511.28	29.1675	1579.79	34.0295	4293.44	416.061	19131.9
OD306	JL17C089	ok	1567.03	26.3776	0.275447	0.0171184		6.03625e-05	3.54432	0.349691	2.97781	41.6503	14.254	5277.75	1.37768e+14		3.63046	0.0621476	0.0978338	0.00257989		3.7156	0.116815	0.275447	0.00471521	0.544492			1568.39	26.8483	1583.24	24.6561	2653.63	259.583	11337
OD306	DE09A207	ok	1558.46	23.9319	0.273928	0.0155866		8.77639e-08	3.54746	0.351172	3.54852	49.5335	14.0342		1.45442e+14		3.65059	0.0569002	0.0979441	0.00251558		3.69927	0.111138	0.273928	0.00426959	0.518803			1560.71	24.3261	1585.35	24.0079	3994.7	408.541	19745.9
OD306	SE24A102	ok	1556.13	16.0187	0.273517	0.0105137		0.00668216	4.31526	0.421074	4.32621	58.5231	16.3083	6431.72	1.69925e+14		3.65608	0.038439	0.0979839	0.00135718		3.69522	0.0642576	0.273517	0.00287569	0.604607			1558.63	16.387	1586.1	12.9459	8488.74	819.896	30479
OD306	DE09A207	ok	1563.35	23.9868	0.274836	0.0155704		8.75909e-08	3.5358	0.350195	3.53485	49.4385	14.0106		1.45696e+14		3.63854	0.0566535	0.0980105	0.00251686		3.71404	0.111537	0.274836	0.0042793	0.518474			1565.3	24.3724	1586.61	23.9998	3994.7	408.541	19745.9
OD306	SE24A106	ok	1548.42	17.2408	0.272137	0.0113627		5.12282e-08	3.89222	0.382352	3.74433	50.5715	14.6629	5948.16	1.49392e+14		3.67462	0.0417535	0.0980421	0.00153605		3.67876	0.0711983	0.272137	0.0030922	0.5871			1551.64	17.6308	1587.21	14.6413	7675.88	745.743	27341.7
OD306	MY08A181	ok	1558.83	13.782	0.27412	0.00902928		0.0046568	5.18097	0.512873	6.35593	89.0983	20.9163	7785.73	2.35889e+14		3.64804	0.0329392	0.0983369	0.00116516		3.71671	0.0553676	0.27412	0.00247511	0.606116			1561.68	14.1009	1592.82	11.0647	11317.6	1120.76	51646.3
OD306	Ap19D425	ok	1586.47	25.2326	0.279224	0.0160968		1.12097e-07	4.41327	0.432838	4.56929	64.7653	17.9526	7378.51	1.91609e+14		3.58135	0.0576483	0.0986056	0.0027492		3.79626	0.122216	0.279224	0.00449462	0.499996			1587.45	25.553	1597.92	26.0188	3927.16	380.386	16195
OD306	SE24A053	ok	1543.23	18.466	0.271396	0.0122054		0.00587408	3.2522	0.319186	3.2602	45.8303	13.067	5645.02	1.33571e+14		3.68466	0.0449727	0.0986829	0.00169118		3.69272	0.0776934	0.271396	0.0033125	0.580116			1547.88	18.8926	1599.38	15.9899	6485.41	636.576	26202.9
OD306	AP24C024	ok	1589.66	29.2642	0.279835	0.0186468		1.07397e-07	4.26144	0.417195	4.64758	65.7848	17.7098	8733.46	1.9186e+14		3.57354	0.066635	0.0987052	0.00310498		3.8084	0.139268	0.279835	0.00521802	0.509914			1590.53	29.6583	1599.8	29.3491	4022.76	387.322	16981.6
OD306	DE09A133	ok	1509.81	18.6533	0.265344	0.0125773		0.00997736	5.93698	0.587266	6.99168	97.7923	24.0929		2.56344e+14		3.76869	0.0473998	0.0987404	0.00192822		3.61248	0.0839107	0.265344	0.00333731	0.541471			1517.13	19.0813	1600.47	18.218	6661.23	678.726	33816.3
OD306	DE09A133	ok	1517.2	18.762	0.266697	0.0125869		0.00996756	5.92728	0.586451	6.97826	97.6992	24.0727		2.57517e+14		3.74957	0.0471956	0.0987735	0.0019283		3.63212	0.0843683	0.266697	0.0033569	0.541877			1524.02	19.1827	1601.09	18.2112	6661.23	678.726	33816.3
OD306	DE09A005	ok	1551.28	21.0403	0.272904	0.0137301		0.0155053	3.59744	0.355629	3.25866	46.397	14.6126		1.44219e+14		3.66429	0.050311	0.0988272	0.00239539		3.71867	0.10359	0.272904	0.00374699	0.49288			1555.53	21.3575	1602.11	22.6071	4079.19	413.336	20784.2
OD306	DE09A005	ok	1556.13	21.1023	0.273793	0.0137253		0.0154937	3.59297	0.355253	3.25389	46.3636	14.6033		1.44632e+14		3.65239	0.0501301	0.0988521	0.00239645		3.73172	0.10396	0.273793	0.00375788	0.492678			1560.03	21.4118	1602.58	22.61	4079.19	413.336	20784.2
OD306	MY08A165	ok	1551.82	20.6953	0.273089	0.0135331		4.1572e-08	3.57878	0.350672	3.91707	55.8558	14.8941	6338.15	1.57697e+14		3.6618	0.0495556	0.0991022	0.00221019		3.73155	0.0973449	0.273089	0.00369575	0.518769			1556.46	21.0638	1607.29	20.7874	8852.45	867.947	41889.7
OD306	MY08A164	ok	1531.55	18.8825	0.269456	0.0125465		0.0110109	3.49849	0.347254	4.07246	57.8338	14.3512	7789.73	1.54643e+14		3.71118	0.0465624	0.0992555	0.00191089		3.6876	0.0847396	0.269456	0.00338074	0.545985			1538.04	19.2971	1610.17	17.9379	7473.87	742.304	34872.1
OD306	OC30C165	ok	1608.87	26.4419	0.283554	0.0167278		8.34325e-08	5.01742	0.49935	6.07861	85.6495	20.6196	7422.03	238115769527421		3.52666	0.0589932	0.0994096	0.00232308		3.88656	0.111695	0.283554	0.00474323	0.582062			1609.24	26.9189	1613.06	21.7653	6149.96	625.535	31694
OD306	SE24A130	ok	1520.88	15.5685	0.267585	0.0104354		0.00601648	4.07319	0.405008	4.54228	60.8742	15.3641	6341.97	1.63e+14		3.73712	0.0389984	0.0994796	0.0015106		3.67027	0.067625	0.267585	0.00279237	0.56637			1528.53	15.9509	1614.37	14.1407	8257.45	807.884	28601.4
OD306	JA05B321	ok	1533.48	14.976	0.269964	0.0099753		4.20645e-08	3.91543	0.391622	4.10762	57.1298	16.1232	6060.9	1.64354e+14		3.7042	0.0369505	0.0997609	0.00131947		3.71336	0.0615167	0.269964	0.00269297	0.602144			1540.62	15.3681	1619.63	24.6166	9525.68	965.054	51317.2
OD306	MY08A143	ok	1553.32	17.073	0.273662	0.0111723		0.00731483	3.95943	0.393729	3.87158	53.541	15.8658	7277.11	1.60757e+14		3.65415	0.0408252	0.100042	0.0017315		3.77485	0.0777633	0.273662	0.00305743	0.542335			1559.36	17.4217	1624.87	16.0954	8129.05	809.124	37341
OD306	JL17C069	ok	1538.21	24.7193	0.270924	0.0162569		1.33223e-07	4.00287	0.397245	4.7498	67.131	16.2974	7150.98	1.78259e+14		3.69107	0.0600053	0.100075	0.00290641		3.73828	0.124421	0.270924	0.00440438	0.488446			1545.49	25.1248	1625.47	27.0062	3063.86	301.268	13256.7
OD306	JA05B270	ok	1553.23	15.1195	0.273675	0.00993949		5.16624e-08	5.80349	0.58012	5.67062	77.6095	24.2708	7251.34	2.40562e+14		3.65397	0.0363186	0.100134	0.00130156		3.77849	0.0618272	0.273675	0.00272019	0.607439			1559.43	15.4999	1626.57	24.1702	11525.6	1166.41	62028.1
OD306	AP19E055	ok	1587.89	27.9709	0.279999	0.0177629		0.00361276	3.3029	0.327519	3.93437	55.0639	13.5455	6529.63	1.52603e+14		3.57144	0.0634392	0.1002	0.00330847		3.86834	0.145037	0.279999	0.00497359	0.473761			1591.36	28.2671	1627.8	30.6944	2870.56	281.964	11804.9
OD306	JA05B319	ok	1536.45	14.2524	0.270645	0.00948711		0.00537911	4.49327	0.452035	4.35318	61.1205	18.5007	6567.1	1.83549e+14		3.69487	0.0350537	0.100205	0.00117868		3.7393	0.0565076	0.270645	0.00256764	0.627795			1544.08	14.6488	1627.89	21.8692	10639.5	1084.15	57280.7
OD306	JL17C023	ok	1587.26	25.5392	0.27989	0.0163126		0.010711	4.41565	0.438265	6.12068	83.4802	17.4655	6520.38	2.12552e+14		3.57283	0.0582821	0.10022	0.00265145		3.86762	0.12021	0.27989	0.00456573	0.52484			1590.81	25.9502	1628.17	24.5928	3130.93	307.401	13172.9
OD306	SE24A250	ok	1482.45	15.8022	0.260832	0.0108739		0.004834	3.9798	0.397884	4.39327	62.4283	16.8302	6303.42	1.68484e+14		3.83388	0.0416892	0.100237	0.00158636		3.60487	0.0692198	0.260832	0.00283626	0.566296			1494.1	16.2466	1628.48	14.7108	8366.39	801.812	27642
OD306	DE09A226	ok	1551.96	21.6799	0.273483	0.0141921		0.00385356	4.12745	0.408633	4.14884	56.9229	16.5324		1.68752e+14		3.65654	0.0518939	0.100259	0.00223798		3.78055	0.100001	0.273483	0.00388129	0.536531			1558.46	22.1177	1628.89	20.7477	4728.02	483.957	23654.7
OD306	DE09A226	ok	1555.05	21.6725	0.274069	0.0141563		0.003845	4.11213	0.40735	4.13082	56.7995	16.5009		1.6879e+14		3.64871	0.0516524	0.100336	0.00223919		3.79156	0.100204	0.274069	0.00387982	0.535654			1561.42	22.1041	1630.32	20.7393	4728.02	483.957	23654.7
OD306	OC30C147	ok	1564.97	21.9942	0.275883	0.0143837		0.00147909	5.15717	0.515907	6.29656	89.5965	21.0786	7406.58	2.38526e+14		3.62473	0.0521371	0.100361	0.00164754		3.81761	0.0833237	0.275883	0.00396823	0.659014			1570.59	22.591	1630.78	15.2547	6057.86	617.236	31034.8
OD306	MY08A030	ok	1564.26	14.648	0.275765	0.00951994		0.000919201	4.42387	0.444996	6.05454	86.0062	17.9979	7541.77	2.15467e+14		3.62628	0.034522	0.100399	0.001452		3.81741	0.0660961	0.275765	0.00262527	0.549829			1570	14.9463	1631.49	13.4379	8853.35	893.069	43146.4
OD306	OC30C123	ok	1553.69	20.0405	0.273996	0.0131273		9.25109e-08	4.57283	0.459919	4.65298	66.3577	18.6862	6659.33	1.9349e+14		3.64969	0.0479106	0.100877	0.00195148		3.81099	0.0890956	0.273996	0.00359683	0.56151			1561.05	20.4924	1640.31	17.9544	5057.38	515.732	25887.4
OD306	Ap19D424	ok	1532.99	21.9782	0.270288	0.0144409		0.00156614	4.91718	0.493361	5.06897	70.9863	20.6513	9759.45	2.07752e+14		3.69976	0.0534278	0.101069	0.00284279		3.76656	0.11909	0.270288	0.00390319	0.456733			1542.26	22.2716	1643.83	26.0934	4430.27	438.994	18863.6
OD306	JL17C068	ok	1512.34	25.8052	0.266551	0.0172417		1.33734e-07	3.55068	0.351078	3.61861	51.11	14.6361	5935.22	1.45981e+14		3.75162	0.0646843	0.101139	0.00320835		3.71706	0.134205	0.266551	0.00459579	0.477541			1523.27	26.2638	1645.12	29.4236	2707.68	265.26	11861.5
OD306	SE24A155	ok	1498.98	14.5115	0.264136	0.0098777		4.93175e-08	4.69251	0.475536	4.54291	61.1965	17.853	6884.77	1.7493e+14		3.78593	0.0373963	0.101193	0.00140956		3.68536	0.0629319	0.264136	0.00260905	0.578449			1510.97	14.9249	1646.12	12.9184	9606.75	952.792	32522.6
OD306	OC30C102	ok	1619.81	20.062	0.286157	0.012588		0.0218783	4.46663	0.453937	4.16371	59.2932	17.7235	6314.54	1.87629e+14		3.49459	0.0439899	0.10127	0.00181711		3.99564	0.0875781	0.286157	0.00360214	0.574312			1622.3	20.4215	1647.52	16.6379	5116.17	525.1	25415.7
OD306	AU28A035	ok	1584.32	30.1392	0.279702	0.0192376		1.04038e-07	2.81251	0.277638	2.71386	37.4642	11.0668	5334.56	1.14812e+14		3.57524	0.0687789	0.101283	0.00335552		3.90602	0.149641	0.279702	0.00538078	0.502151			1589.86	30.585	1647.77	30.7189	2728.76	269.018	11390.1
OD306	DE09A227	ok	1545.93	20.0244	0.272747	0.0131991		8.7347e-08	6.02019	0.614317	6.98822	97.4327	24.1517		2.63115e+14		3.6664	0.0483933	0.101391	0.00189088		3.81296	0.0871171	0.272747	0.00360003	0.577703			1554.73	20.5211	1649.74	17.2877	6806.12	718.084	34104.8
OD306	DE09A227	ok	1548.81	20.0665	0.273295	0.0132012		8.71517e-08	5.99773	0.612377	6.95768	97.2203	24.1055		2.63126e+14		3.65905	0.0483036	0.10147	0.00189173		3.82357	0.0873451	0.273295	0.00360781	0.577886			1557.51	20.5609	1651.17	17.2789	6806.12	718.084	34104.8
OD306	OC30C146	ok	1592.99	21.2623	0.281343	0.0135614		9.31823e-08	4.72409	0.474616	5.74361	80.0053	18.7175	7049.99	2.16634e+14		3.55439	0.0482023	0.101474	0.00204607		3.93632	0.0956516	0.281343	0.00381539	0.558086			1598.12	21.6727	1651.25	18.6877	5185.68	530.543	25752.8
OD306	JA05B318	ok	1530.66	13.0421	0.270065	0.00870634		4.35839e-08	4.90576	0.496869	4.90777	69.1896	20.2845	6777.2	2.03057e+14		3.70282	0.032238	0.101709	0.00113492		3.78728	0.0536021	0.270065	0.00235128	0.615151			1541.13	13.4176	1655.54	20.6722	11520.4	1181.85	62269.1
OD306	NO12B483	ok	1523.44	17.3226	0.268791	0.0115854		0.00215431	3.14946	0.318128	3.64075	51.4369	12.8792	5933.87	1.37393e+14		3.72036	0.0431018	0.101836	0.00170244		3.77415	0.0767642	0.268791	0.00311405	0.569601			1534.66	17.7797	1657.86	15.4808	6311.12	642.079	32871.2
OD306	MY14A150	ok	1552.91	18.3	0.274168	0.0119802		0.00705258	5.4022	0.549886	6.55842	91.5208	21.6247	7454.5	242101382462177		3.6474	0.0436965	0.10186	0.00184631		3.85055	0.0836617	0.274168	0.00328458	0.55139			1561.92	18.7121	1658.29	16.7841	5682.47	573.081	26013.6
OD306	JL17C138	ok	1523.11	21.6452	0.268756	0.014349		0.0107788	4.66176	0.465413	6.27741	88.8613	19.0917	6844.41	2.18986e+14		3.72084	0.0533902	0.101921	0.0026982		3.7768	0.113727	0.268756	0.00385637	0.476519			1534.49	22.0183	1659.4	24.5102	3521.19	349.074	15306
OD306	AU20B031	ok	1564.37	27.8475	0.276292	0.0180513		0.00322879	3.18491	0.320048	3.40985	47.5209	12.9746	5631.98	1.372e+14		3.61936	0.0653341	0.101973	0.00297134		3.88467	0.133154	0.276292	0.00498742	0.526632			1572.66	28.3885	1660.34	26.9744	3385.64	340.313	14152.5
OD306	SE24A151	ok	1501.76	15.3139	0.264928	0.0104158		0.00091265	4.74768	0.485579	4.78266	64.0152	17.9723	6934.18	1.79357e+14		3.77461	0.0393157	0.10212	0.00142137		3.73025	0.0648485	0.264928	0.00275945	0.599146			1515.01	15.7801	1663	12.8806	9503.8	952.126	32176.5
OD306	JL17C203	ok	1551.86	21.9394	0.274087	0.0143597		0.0252987	5.54176	0.567407	6.18635	87.8812	22.5017	7514.59	2.42595e+14		3.64848	0.0523912	0.102209	0.00227691		3.86261	0.102375	0.274087	0.00393582	0.541795			1561.51	22.4229	1664.63	20.6111	4318.84	439.882	18593.6
OD306	SE24A126	ok	1543.37	16.1526	0.272589	0.0106415		0.00551653	4.00953	0.408775	3.89926	52.1268	14.9418	6166.95	1.52407e+14		3.66853	0.0390385	0.102362	0.00164452		3.84721	0.0741376	0.272589	0.00290074	0.552216			1553.93	16.5361	1667.38	14.8592	7983.39	801.535	27454.3
OD306	MY08A077	ok	1559.51	30.545	0.27557	0.0198713		0.000276113	2.85947	0.291118	4.13097	61.5917	12.1773	6103.78	1.49537e+14		3.62884	0.0721098	0.102485	0.00323801		3.89399	0.145341	0.27557	0.00547595	0.532395			1569.01	31.1784	1669.61	29.2138	6802.85	693.979	34060.4
OD306	Ap19D406	ok	1584.19	30.2592	0.280096	0.0193062		0.000943985	2.92765	0.3029	2.93765	41.1494	11.9516	6146.4	1.24856e+14		3.57021	0.0689271	0.10257	0.0034075		3.96122	0.152205	0.280096	0.00540759	0.502456			1591.85	30.7325	1671.14	30.7115	2574.63	263.06	10667.7
OD306	DE09A185	ok	1536.61	25.145	0.27143	0.0166196		0.0283956	2.95663	0.302461	2.90952	40.3486	11.7983		1.18753e+14		3.68419	0.0612296	0.102593	0.00267519		3.83952	0.118725	0.27143	0.00451105	0.53747			1548.06	25.7281	1671.55	24.1047	3339.33	352.615	16655.6
OD306	JA05B341	ok	1524.9	16.6092	0.269296	0.0110992		4.1081e-08	3.60441	0.367918	3.92792	52.8018	14.4505	5742.71	1.48329e+14		3.71339	0.0412157	0.102595	0.0016198		3.8094	0.0735189	0.269296	0.00298897	0.575108			1537.23	17.062	1671.59	29.1895	8972.03	927.766	47290.3
OD306	DE09A185	ok	1543.01	25.2491	0.272615	0.016616		0.028348	2.94836	0.301744	2.89998	40.2828	11.7814		1.19129e+14		3.66818	0.0609503	0.102652	0.00267629		3.85849	0.11929	0.272615	0.00452976	0.537451			1554.06	25.8222	1672.62	24.0974	3339.33	352.615	16655.6
OD306	JA05B247	ok	1510.27	13.5116	0.266645	0.009132		5.58662e-08	6.41461	0.657291	6.46596	89.1381	27.2318	7738.66	2.63998e+14		3.7503	0.0342478	0.102654	0.00126866		3.77407	0.0579943	0.266645	0.00243501	0.594279			1523.75	13.9149	1672.65	22.8457	11799	1223.68	63808.7
OD306	AP24C017	ok	1565.21	24.438	0.276677	0.0157921		0.00880795	3.61985	0.368373	4.18763	59.3919	14.942	6498.71	1.63947e+14		3.61432	0.0570777	0.102695	0.00277852		3.91764	0.12273	0.276677	0.00436931	0.504096			1574.61	24.8663	1673.4	25.0048	3307.55	331.625	13947.6
OD306	MY08A005	ok	1496.48	19.7742	0.264229	0.0134127		5.04199e-08	3.28004	0.335812	3.74937	55.7525	14.1283	6173.81	1.46936e+14		3.78459	0.0507617	0.102969	0.00225168		3.75137	0.096235	0.264229	0.00354404	0.522847			1511.44	20.2726	1678.32	20.1971	6759.91	694.343	35236.9
OD306	MY08A142	ok	1543.36	13.8199	0.272787	0.00906607		4.83929e-08	4.77659	0.487953	5.59804	77.3634	19.4316	7124.68	2.10029e+14		3.66586	0.033235	0.102989	0.00157759		3.87362	0.06895	0.272787	0.00247311	0.509333			1554.93	14.0971	1678.68	14.1472	10164.1	1039.31	47417.4
OD306	JL17C110	ok	1514.36	27.7587	0.26754	0.0184783		0.00636891	2.82298	0.288282	2.87193	40.0334	11.5918	5542.81	1.1525e+14		3.73775	0.0690671	0.103128	0.00360566		3.80422	0.150441	0.26754	0.00494368	0.467263			1528.31	28.2404	1681.16	32.2806	2106.87	213.461	9186.91
OD306	AP24C022	ok	1571.32	21.4282	0.277951	0.0137583		0.0177277	4.99918	0.507923	5.29063	74.7878	20.6744	9013.28	2.1854e+14		3.59776	0.0494991	0.103186	0.00255712		3.95448	0.112089	0.277951	0.00382413	0.485393			1581.03	21.7523	1682.2	22.8773	4461.4	446.025	18772.2
OD306	MY14A209	ok	1534.03	29.8523	0.271203	0.0195126		1.01099e-07	1.86765	0.190118	2.3392	31.934	7.59121	4560.05	8.35954e+13		3.68727	0.0719481	0.103365	0.00416626		3.86516	0.173087	0.271203	0.00529187	0.435731			1546.91	30.1841	1685.39	37.194	1854.69	186.244	8564.28
OD306	OC30C124	ok	1568.66	19.8087	0.277551	0.0128513		9.37265e-08	4.95945	0.513439	5.73974	81.412	19.9243	7243.29	2.21941e+14		3.60294	0.0463024	0.103453	0.00187994		3.95903	0.0881159	0.277551	0.00356689	0.577406			1579.02	20.2924	1686.98	16.7652	5413.78	568.381	27245.1
OD306	SE24A179	ok	1485.89	16.1516	0.262513	0.0111205		0.00894919	4.61878	0.478476	4.40039	59.3324	17.7325	6791.17	1.70326e+14		3.80933	0.0423617	0.103669	0.00144028		3.75235	0.0667751	0.262513	0.00291928	0.624903			1502.69	16.7106	1690.83	12.8114	9459.84	954.132	31323.4
OD306	AP19E012	ok	1536.78	23.7942	0.271861	0.0156287		0.00231152	4.50818	0.463662	6.36817	89.1923	18.5753	8396.68	2.18556e+14		3.67836	0.0574877	0.103854	0.00293214		3.89288	0.125624	0.271861	0.00424882	0.484304			1550.24	24.2282	1694.11	26.0244	3824.96	390.626	15853.7
OD306	Ap19D404	ok	1562.32	24.8511	0.276675	0.0161465		0.0134764	5.03611	0.528349	5.12929	72.3898	20.7661	9970.62	2.14677e+14		3.61435	0.0583593	0.104322	0.00258139		3.97967	0.117586	0.276675	0.00446734	0.546478			1574.59	25.4242	1702.4	22.7845	4509.59	467.218	18875.6
OD306	AP19E028	ok	1545.02	25.8361	0.273528	0.0169676		0.00612494	4.92054	0.507737	6.43513	90.5295	20.1334	8231.02	2.30705e+14		3.65593	0.0620323	0.104362	0.00278349		3.93594	0.124419	0.273528	0.00464112	0.53676			1558.69	26.4472	1703.11	24.5567	4172.45	427.103	17152.1
OD306	MY14A173	ok	1513.24	20.1348	0.267745	0.0134866		0.0075282	4.26283	0.440389	6.07019	85.0951	17.5651	7146.76	2.04065e+14		3.7349	0.0503713	0.104433	0.00232479		3.85531	0.100345	0.267745	0.00361098	0.518164			1529.34	20.6257	1704.35	20.4928	4312.88	440.694	20270.8
OD306	NO12B539	ok	1515.96	17.0497	0.268256	0.0114597		0.0223197	3.51384	0.366118	5.07635	70.6985	14.4359	7095.87	1.68973e+14		3.72779	0.0427193	0.104474	0.00168805		3.86418	0.0765452	0.268256	0.00307413	0.578512			1531.94	17.5556	1705.07	14.8728	6755.45	709.367	35400.3
OD306	SE24A033	ok	1535.72	16.6622	0.272045	0.0110239		0.00564934	3.64892	0.384441	3.732	53.5591	15.1602	5972.58	1.54596e+14		3.67586	0.0405222	0.105043	0.00174917		3.94011	0.0786853	0.272045	0.00299898	0.552011			1551.17	17.0999	1715.06	15.3086	7359.01	778.654	31436
OD306	Ap19D388	ok	1567.07	31.373	0.277953	0.0202096		1.13963e-07	2.47531	0.258555	1.97165	28.1318	10.188	4759.68	9.64168e+13		3.59774	0.0727087	0.105586	0.00371397		4.04648	0.164154	0.277953	0.0056173	0.498175			1581.04	31.9522	1724.54	32.2986	2220.15	229.005	9284.5
OD306	MY08A116	ok	1542.48	15.8757	0.273532	0.010474		0.00143366	4.5808	0.485489	6.60933	91.628	18.4737	7977.39	2.21867e+14		3.65588	0.0382917	0.105826	0.00157078		3.99119	0.0725056	0.273532	0.00286497	0.576558			1558.7	16.3259	1728.71	13.6221	9346.69	991.955	43653.4
OD306	JA05B296	ok	1553.51	16.0649	0.275626	0.0105661		0.0125875	4.02733	0.426892	4.47808	60.7411	16.6923	5925.58	1.74641e+14		3.62811	0.038335	0.106066	0.00133638		4.03086	0.0662816	0.275626	0.0029123	0.642569			1569.3	16.5814	1732.87	23.1143	8396.93	901.358	45202.7
OD306	JL17C159	ok	1556.64	26.9049	0.276219	0.0174685		1.35698e-07	3.86917	0.407682	4.05058	55.4951	15.4742	5790.94	1.6125e+14		3.62031	0.0632415	0.106126	0.00314183		4.0418	0.138934	0.276219	0.00482514	0.508184			1572.29	27.4656	1733.9	27.1521	2879.77	301.484	12220.1
OD306	AP19E045	ok	1597.62	27.7493	0.283764	0.0175011		1.21672e-07	3.84871	0.40916	4.26418	57.7066	15.3525	6160.66	1.68132e+14		3.52405	0.0616749	0.10627	0.00328051		4.15785	0.147544	0.283764	0.0049662	0.493191			1610.29	28.1819	1736.39	28.3033	3195.46	336.682	12790.4
OD306	MY08A028	ok	1575.86	15.9915	0.279801	0.0103611		0.00649759	5.25666	0.55865	6.26392	87.9568	21.0376	7581.7	2.38068e+14		3.57397	0.0370301	0.106329	0.0013136		4.10205	0.0661406	0.279801	0.00289903	0.642594			1590.36	16.4778	1737.4	11.3257	10498.6	1118.92	50371.5
OD306	AP24C018	ok	1623.79	28.4572	0.288614	0.0177117		1.13748e-07	3.29859	0.349513	3.21743	43.38	13.1322	5612.74	1.3869e+14		3.46483	0.0613682	0.106463	0.00302294		4.23661	0.14178	0.288614	0.00511186	0.529254			1634.6	28.9516	1739.72	26.0229	2937.42	306.573	11937.1
OD306	MY14A005	ok	1507.79	27.062	0.26741	0.0182141		1.05884e-07	2.81418	0.294849	2.88195	40.1164	11.5471	5439.65	1.14534e+14		3.73957	0.0681129	0.106538	0.00304902		3.92811	0.133255	0.26741	0.00487065	0.536917			1527.64	27.8247	1741	26.2247	2711.41	284.666	12943.3
OD306	SE24A003	ok	1549.89	15.3452	0.275134	0.0100565		5.2954e-08	4.5902	0.487492	5.304	75.8002	19.8806	6882.86	2.11743e+14		3.6346	0.0365514	0.106593	0.00158955		4.04366	0.0727308	0.275134	0.00276689	0.55912			1566.81	15.7566	1741.96	13.663	8768.68	941.085	40333.5
OD306	AP19E044	ok	1540.8	24.3277	0.273476	0.0159777		1.19818e-07	5.10908	0.547228	5.03758	72.0477	21.1294	9926	2.13063e+14		3.65663	0.0584245	0.106612	0.00281568		4.02	0.124088	0.273476	0.00436951	0.517621			1558.42	24.9	1742.28	24.1971	4307.8	457.313	17877.9
OD306	AP19E054	ok	1576.49	32.3098	0.280036	0.0206668		0.0143256	3.06505	0.320371	2.82932	41.7588	12.6986	5691.7	1.29452e+14		3.57097	0.0738005	0.106696	0.00386226		4.11967	0.17172	0.280036	0.00578745	0.495809			1591.54	32.8921	1743.72	33.159	2683.98	277.909	11151.2
OD306	Ap19D407	ok	1576.04	28.4982	0.279965	0.01812		1.13761e-07	2.88755	0.296944	2.85294	39.8694	11.7935	5976.31	1.2156e+14		3.57188	0.0647225	0.106727	0.00382598		4.11981	0.165483	0.279965	0.00507297	0.451109			1591.19	28.8323	1744.25	32.8359	2562.71	260.259	10622.8
OD306	Ap19D438	ok	1546.88	27.0507	0.274688	0.0176176		0.0150563	3.45286	0.360491	3.15564	44.4546	14.1091	6081.2	1.38378e+14		3.64049	0.0641368	0.10692	0.0034152		4.04949	0.147718	0.274688	0.00483934	0.482965			1564.55	27.5637	1747.57	29.2453	3039.29	313.39	12579.4
OD306	AU20B039	ok	1618.69	23.5847	0.287908	0.0147708		0.0138837	5.46598	0.588813	6.55934	88.2455	21.7928	8403.73	2.50439e+14		3.47333	0.0513039	0.107137	0.0023197		4.25298	0.111471	0.287908	0.00425264	0.563552			1631.07	24.0922	1751.27	19.8149	5222.6	562.6	21301
OD306	OC30C178	ok	1602.87	19.9358	0.285045	0.0126131		9.08707e-08	4.40751	0.47091	6.28994	87.2728	17.5063	7377.84	2.20018e+14		3.50822	0.0442495	0.107236	0.00199274		4.21459	0.0946557	0.285045	0.0035953	0.561604			1616.72	20.3918	1752.97	17.0027	4959.43	542.879	24710.8
OD306	MY08A004	ok	1566.02	17.4371	0.278305	0.011301		5.2714e-08	3.87519	0.413966	4.24768	59.6137	15.6316	6055.2	1.68453e+14		3.59318	0.0406067	0.107264	0.00180301		4.11601	0.0833691	0.278305	0.00314513	0.557943			1582.82	17.8875	1753.45	15.3789	7639.44	818.762	37307.6
OD306	MY08A052	ok	1566.55	14.863	0.278479	0.00963448		0.0104995	4.53734	0.488132	6.62251	92.0938	18.2805	7691.82	2.25151e+14		3.59094	0.0345968	0.1075	0.00151092		4.12763	0.0703356	0.278479	0.002683	0.565397			1583.7	15.2581	1757.46	12.8528	9071.65	978.314	43396.3
OD306	AU28A034	ok	1573.58	32.0933	0.27977	0.0205993		0.0250989	2.89953	0.310549	2.87252	38.0035	11.3365	5252.92	1.16239e+14		3.57436	0.0736294	0.10751	0.00371717		4.14718	0.166908	0.27977	0.00576307	0.511831			1590.2	32.7571	1757.64	31.6167	2822.16	301.904	11705.1
OD306	AP19E037	ok	1550.5	24.2487	0.275556	0.0158064		0.0154285	4.50324	0.480567	4.5119	61.5967	18.3558	9074.34	1.85174e+14		3.62903	0.0573621	0.107554	0.00284978		4.08638	0.126076	0.275556	0.00435555	0.51232			1568.94	24.7994	1758.39	24.2268	3719.9	393.601	15223.4
OD306	AU28A004	ok	1515.98	29.4552	0.269251	0.019678		1.09868e-07	3.02199	0.32092	3.004	42.9415	12.6644	5699.38	1.251e+14		3.71401	0.0730842	0.10762	0.0034495		3.9953	0.150268	0.269251	0.00529832	0.523195			1537	30.2451	1759.5	29.3035	2749.21	293.073	12229.9
OD306	DE09A057	ok	1520.07	21.9869	0.270029	0.0145914		0.00145724	3.49743	0.373251	3.78519	52.765	14.2058		1.46342e+14		3.70331	0.0540364	0.107711	0.00278766		4.01025	0.119148	0.270029	0.0039401	0.491114			1540.95	22.4846	1761.05	23.6565	3987.33	437.009	20286.4
OD306	DE09A057	ok	1517.44	21.9647	0.269548	0.0146032		0.00145718	3.49719	0.373229	3.78487	52.7628	14.2053		1.46053e+14		3.70991	0.0541764	0.107713	0.00278817		4.00317	0.118976	0.269548	0.00393626	0.491352			1538.51	22.4671	1761.08	23.6604	3987.33	437.009	20286.4
OD306	SE24A004	ok	1538.97	16.153	0.273507	0.0107034		0.00102573	4.79776	0.516844	6.2393	88.7981	20.9215	7330.79	2.3219e+14		3.65621	0.0391339	0.107754	0.00149297		4.06354	0.0711449	0.273507	0.00292746	0.61134			1558.58	16.6821	1761.79	12.6633	9169.22	997.982	42418.8
OD306	MY08A029	ok	1579.48	18.3727	0.281027	0.011852		5.15343e-08	3.88333	0.416612	4.67653	65.5696	15.4882	6560.69	176753047674733		3.55837	0.0421739	0.108044	0.00163224		4.18649	0.0803868	0.281027	0.00333074	0.617245			1596.53	18.9221	1766.69	13.799	7816.96	840.999	37361.7
OD306	AU20B030	ok	1557.61	24.9041	0.27708	0.0161605		0.00293813	3.55598	0.384355	4.13363	57.0711	14.4199	6090.25	1.5705e+14		3.60906	0.0583244	0.108239	0.00289504		4.13516	0.129223	0.27708	0.00447777	0.517143			1576.64	25.4794	1769.99	24.4206	3761.98	406.747	15659.8
OD306	AP19E027	ok	1515.35	22.8987	0.269907	0.0152723		0.00360264	4.91571	0.545172	5.06721	71.2728	20.3888	9974.01	2.03902e+14		3.70497	0.0565835	0.110055	0.00280375		4.09569	0.121654	0.269907	0.00412211	0.51417			1540.33	23.5244	1800.32	23.1734	4220.71	464.379	17589.1
OD306	JL17C109	ok	1503.08	35.2785	0.267752	0.0237709		1.337e-07	2.37904	0.254916	2.31378	32.738	9.8878	5136.6	9.5792e+13		3.73479	0.0887793	0.110366	0.00418818		4.07446	0.182448	0.267752	0.0063647	0.530855			1529.38	36.3547	1805.44	34.4968	1806.35	192.024	7972.55
OD306	JA05B314	ok	1529.6	15.7067	0.272701	0.010446		4.53397e-08	4.00105	0.441107	4.45139	60.2213	16.5026	6068.78	1.69882e+14		3.66702	0.0383058	0.1106	0.00159281		4.15855	0.0739856	0.272701	0.00284865	0.587147			1554.5	16.2384	1809.29	26.1713	9033.52	1008.72	48652.5
OD306	JL17C090	ok	1539.97	27.6488	0.274612	0.0181375		1.33321e-07	3.69379	0.405832	3.10739	42.911	14.7461	5411.44	1.39521e+14		3.6415	0.0660476	0.110617	0.00331914		4.18834	0.14685	0.274612	0.00498077	0.517304			1564.17	28.3701	1809.57	27.263	2818.45	307.031	11952.6
OD306	SE24A253	ok	1486.7	16.3966	0.264978	0.0112646		4.70022e-08	4.29763	0.476727	5.37565	75.9428	17.9676	6949.98	1.91493e+14		3.77389	0.0425113	0.111122	0.00154498		4.05986	0.0726475	0.264978	0.00298487	0.629513			1515.26	17.0688	1817.84	12.6199	9220.29	979.794	29984.2
OD306	JA23C002	ok	1584.12	26.0019	0.282925	0.0165427		0.00686985	5.20646	0.567023	5.42622	73.3343	21.189	9175.87	2.21829e+14		3.5345	0.0584701	0.111218	0.00310192		4.33858	0.140689	0.282925	0.00468034	0.510145			1606.08	26.5688	1819.41	25.3106	4451.89	486.383	21266.2
OD306	JL17C046	ok	1566.87	25.6985	0.279789	0.0165294		0.0165262	3.66177	0.410359	3.64279	51.686	14.3702	5995.15	1.51043e+14		3.57412	0.0590779	0.111326	0.00313358		4.29466	0.140187	0.279789	0.00462474	0.50638			1590.3	26.2866	1821.18	25.5385	2778.64	308.288	11593.7
OD306	MY14A076	ok	1564.44	22.3865	0.279424	0.014502		0.00755607	5.69031	0.624423	6.78107	94.1624	22.7603	7748.82	2.54223e+14		3.57879	0.0518998	0.111573	0.00240872		4.29857	0.111794	0.279424	0.00405222	0.557614			1588.46	23.0359	1825.2	19.5779	5490.46	600.33	25331.9
OD306	MY08A117	ok	1533.89	15.9138	0.273893	0.0104987		0.00431281	4.62889	0.515998	6.49939	90.001	18.6676	7733.79	2.19631e+14		3.65106	0.0383315	0.111854	0.00184427		4.22411	0.0825685	0.273893	0.00287553	0.537104			1560.53	16.3836	1829.76	14.9441	9417.62	1051.24	43967.7
OD306	MY08A051	ok	1588.71	18.4816	0.284135	0.0117819		0.00307539	4.5483	0.506522	6.66007	90.7251	18.1779	7502.27	2.26337e+14		3.51945	0.041466	0.112319	0.00194918		4.40026	0.0922981	0.284135	0.00334766	0.561698			1612.15	18.9943	1837.27	15.7145	9869.49	1101.81	46853.7
OD306	DE09A160	ok	1553.44	22.7981	0.277681	0.0147581		8.49404e-08	2.83434	0.317242	2.86171	38.6469	11.0827		1.13855e+14		3.60126	0.0531477	0.112433	0.00294117		4.30466	0.129292	0.277681	0.00409803	0.491358			1579.67	23.3129	1839.1	23.6828	3303.96	381.338	16154.2
OD306	DE09A160	ok	1560.95	22.8473	0.279079	0.0147133		8.48263e-08	2.828	0.31664	2.85419	38.5964	11.07		1.14336e+14		3.58321	0.0527209	0.112484	0.00294204		4.32833	0.129891	0.279079	0.00410618	0.490287			1586.72	23.3459	1839.94	23.6765	3303.96	381.338	16154.2
OD306	OC30C179	ok	1616.76	19.1842	0.289482	0.0119301		0.00683622	5.06855	0.57385	6.14267	82.371	19.8485	7218.06	2.30379e+14		3.45445	0.0412119	0.112865	0.00229707		4.50488	0.106275	0.289482	0.00345355	0.505702			1638.94	19.5527	1846.06	18.4099	5600.14	649.715	27511.2
OD306	DE09A030	ok	1549.55	24.4998	0.277343	0.0160762		0.00907176	3.72133	0.417656	4.28331	57.9961	14.7691		1.59354e+14		3.60565	0.057965	0.113594	0.00245221		4.34384	0.116918	0.277343	0.00445861	0.597275			1577.97	25.3676	1857.69	19.4997	4178.38	481.12	20787.1
OD306	DE09A030	ok	1550.31	24.4006	0.277488	0.0160003		0.00906805	3.71881	0.417414	4.27988	57.9733	14.764		1.59383e+14		3.60376	0.0576611	0.11361	0.00245314		4.34671	0.116817	0.277488	0.00443987	0.595364			1578.7	25.2596	1857.94	19.5038	4178.38	481.12	20787.1
OD306	AU28A005	ok	1539.07	23.5017	0.275429	0.0154561		0.0105605	5.06684	0.57797	5.27229	71.604	20.6789	8861.87	2.09602e+14		3.6307	0.0561163	0.113653	0.0026948		4.3161	0.122161	0.275429	0.00425705	0.546082			1568.3	24.2397	1858.63	21.4152	4551.96	521.116	19719.6
OD306	DE09A108	ok	1524.08	20.5502	0.272978	0.0136224		8.69389e-08	4.8663	0.55422	4.82539	66.0278	19.1831		1.9183e+14		3.6633	0.049903	0.11462	0.00249672		4.31409	0.110835	0.272978	0.00371863	0.530232			1555.9	21.1952	1873.92	19.6374	5553.72	650.886	27398.8
OD306	DE09A108	ok	1530.77	20.6752	0.27422	0.0136443		8.68827e-08	4.86107	0.553714	4.81929	65.9865	19.1725		1.92664e+14		3.6467	0.0497566	0.114645	0.00249668		4.33468	0.111396	0.27422	0.00374153	0.530932			1562.19	21.3149	1874.32	19.6319	5553.72	650.886	27398.8
OD306	Ap19D414	ok	1558.76	24.1927	0.279534	0.0156267		1.1624e-07	4.64569	0.526641	4.75617	66.1186	18.9137	9694.85	1.95257e+14		3.57738	0.0559025	0.115099	0.00302516		4.43615	0.135647	0.279534	0.00436818	0.511047			1589.01	24.831	1881.43	23.6734	4016.39	449.644	16588.2
OD306	JA05B320	ok	1534.11	18.8642	0.275033	0.0125133		4.25288e-08	2.69507	0.310563	3.22768	43.5589	10.9421	4513.76	1.17469e+14		3.63592	0.0454974	0.115252	0.00187414		4.37054	0.0896772	0.275033	0.00344157	0.609853			1566.3	19.5996	1883.83	29.2848	6485.42	756.978	34438.9
OD306	MY14A226	ok	1504.74	45.4802	0.269681	0.0303073		9.64247e-08	1.85809	0.204347	2.25884	31.4557	7.7081	4592.56	8.19092e+13		3.70808	0.112382	0.115474	0.00647488		4.29375	0.273678	0.269681	0.00817332	0.475494			1539.18	46.6486	1887.29	50.4691	1932.26	209.37	9089.38
OD306	Ap19D386	ok	1556.53	24.5543	0.279255	0.0159677		1.15626e-07	5.36029	0.623632	6.57839	90.2326	21.9249	8481.46	2.42914e+14		3.58096	0.0571796	0.115496	0.00274592		4.44703	0.12736	0.279255	0.00445904	0.557542			1587.61	25.3504	1887.64	21.3983	4744.62	545.104	19720.5
OD306	MY14A119	ok	1547.01	27.9387	0.277675	0.018219		0.00569077	2.16769	0.247731	3.14137	42.5971	8.58371	5054.32	1.03455e+14		3.60133	0.0656127	0.116043	0.00340724		4.44281	0.153522	0.277675	0.00505898	0.527246			1579.64	28.7796	1896.13	26.3999	2276.46	258.369	10345.9
OD306	NO12B616	ok	1539.42	15.8058	0.276352	0.0102929		0.000900574	3.74973	0.439615	5.60474	76.9569	14.9329	7832.76	1.82509e+14		3.61858	0.0372458	0.116289	0.0021673		4.43101	0.0943389	0.276352	0.00284447	0.48345			1572.96	16.1904	1899.94	16.7495	7386.28	873.443	37594.7
OD306	AU20B033	ok	1562.5	22.4446	0.280642	0.0143869		9.71232e-08	4.01917	0.470857	4.08284	54.2267	16.2666	6431.11	1.65084e+14		3.56326	0.0512644	0.116359	0.00305695		4.50248	0.134863	0.280642	0.00403758	0.480315			1594.59	22.9413	1901.02	23.6078	4191.98	491.204	17395.4
OD306	JL17C179	ok	1563.22	27.5677	0.280792	0.0177732		1.36895e-07	3.90495	0.454609	4.83443	66.8223	15.4617	6670.92	1.76123e+14		3.56135	0.0632967	0.116414	0.00336213		4.50706	0.152841	0.280792	0.00499059	0.524107			1595.35	28.3545	1901.88	25.9495	2875.48	332.794	12076.5
OD306	MY14A006	ok	1524.78	37.3747	0.273833	0.0245604		1.06581e-07	1.19666	0.130893	1.07624	15.1681	4.80333	3708.55	4.63928e+13		3.65186	0.0896913	0.116865	0.00526673		4.41238	0.226464	0.273833	0.00672546	0.478531			1560.23	38.3199	1908.83	40.4591	1145.32	125.526	5347.81
OD306	AP19E011	ok	1570.25	23.6355	0.282343	0.0152249		0.0013375	5.40756	0.633615	6.47643	85.0567	21.5409	7992.75	2.36496e+14		3.54179	0.0539234	0.117172	0.00263557		4.56143	0.123895	0.282343	0.00429866	0.560534			1603.15	24.4079	1913.52	20.1823	4514.32	525.264	18090.9
OD306	JL17C158	ok	1550.72	26.6945	0.278753	0.0173582		1.37337e-07	3.64354	0.42451	4.24391	58.7314	14.4372	6242.33	1.58435e+14		3.5874	0.0622707	0.11724	0.00326682		4.50606	0.147929	0.278753	0.00483865	0.528749			1585.08	27.5141	1914.57	24.9984	2679.72	310.202	11266.3
OD306	SE24A058	ok	1567.24	17.2056	0.281837	0.0111324		0.00720581	3.42694	0.403978	3.70575	50.8871	13.1905	5469.1	1.43004e+14		3.54815	0.0394994	0.117319	0.0017995		4.55899	0.0864045	0.281837	0.00313751	0.587381			1600.61	17.8185	1915.78	13.7589	6898.5	812.451	26550.5
OD306	OC30C108	ok	1656.07	23.4851	0.298311	0.014374		9.24096e-08	3.89644	0.454012	3.88144	49.728	14.8076	5281.77	1.61011e+14		3.35221	0.0481846	0.117456	0.00215407		4.83108	0.11257	0.298311	0.00428792	0.616877			1682.93	24.1904	1917.87	16.4468	4314.78	508.312	20532
OD306	JL17C137	ok	1506.12	18.7784	0.270735	0.0124959		0.0269515	5.68114	0.6652	6.73786	96.3024	23.1278	8022.19	2.48329e+14		3.69364	0.0461555	0.11797	0.00267284		4.40372	0.113943	0.270735	0.00338309	0.482947			1544.53	19.3004	1925.71	20.2997	4302.78	500.256	18592.3
OD306	AP19E013	ok	1510.35	37.0873	0.271804	0.0246731		1.3897e-05	2.73386	0.328322	2.36936	31.2481	11.1044	5315.14	1.01498e+14		3.67912	0.0907755	0.118853	0.00506313		4.45418	0.219275	0.271804	0.00670625	0.50119			1549.95	38.2422	1939.05	38.1077	2299.86	274.241	9396.27
OD306	AU20B040	ok	1587.39	21.7391	0.286163	0.0137107		0.00570154	5.25216	0.623165	6.25266	85.2702	21.1067	8666.87	2.37029e+14		3.49451	0.0479123	0.119096	0.00289103		4.69909	0.131007	0.286163	0.00392351	0.491791			1622.33	22.2433	1942.71	21.7056	5355.93	635.462	22010.4
OD306	NO12B456	ok	1506.68	17.8515	0.271221	0.0119614		0.00463618	3.93651	0.47263	5.75666	74.2002	15.6265	7535.57	1.78859e+14		3.68703	0.0441021	0.119159	0.00222971		4.45604	0.0989622	0.271221	0.00324418	0.538594			1546.99	18.5042	1943.64	16.7299	6764.9	817.826	34179.3
OD306	SE24A028	ok	1559.62	17.1668	0.28104	0.0111605		0.00380275	3.56785	0.424203	4.0205	54.4883	14.4737	5908.9	1.54373e+14		3.55822	0.0397115	0.119167	0.0018147		4.61768	0.0871821	0.28104	0.00313655	0.591127			1596.6	17.8188	1943.77	13.6148	7044.25	842	29542.9
OD306	MY08A078	ok	1568.6	26.0187	0.282955	0.016873		0.0250744	4.73807	0.579315	6.94522	90.9458	18.1103	7506.68	2.23015e+14		3.53413	0.0596314	0.119918	0.0024785		4.67847	0.124826	0.282955	0.00477429	0.632397			1606.23	27.1018	1955	18.4541	8204.6	1005.16	36855.6
OD306	AP24C020	ok	1581.02	35.4835	0.28531	0.0227673		1.06121e-07	4.11454	0.483399	4.50281	62.2409	16.8726	6499.3	1.81122e+14		3.50496	0.0797985	0.120068	0.00361283		4.72331	0.178222	0.28531	0.00649572	0.603386			1618.05	36.8385	1957.24	26.8592	3928.49	454.383	16417.4
OD306	AU28A016	ok	1501.68	35.2632	0.27078	0.0236697		0.00116834	3.98768	0.472772	4.2596	59.8181	16.5062	5967.32	1.65947e+14		3.69304	0.0874131	0.120667	0.00458672		4.50514	0.201733	0.27078	0.00640928	0.528596			1544.76	36.564	1966.12	33.8949	4125.07	489.785	18119.6
OD306	AU20B037	ok	1571.45	23.3409	0.284086	0.0149029		0.0292039	5.66967	0.697798	6.53977	89.2677	22.8572	8428.68	2.49922e+14		3.52006	0.052459	0.121713	0.00304108		4.76746	0.138698	0.284086	0.00423369	0.512256			1611.91	24.022	1981.49	22.2399	5892.57	725.285	24319.8
OD306	MY08A006	ok	1568.47	15.672	0.283597	0.0100254		0.0237978	4.298	0.522904	4.44294	58.2218	17.009	6041.56	1.75273e+14		3.52613	0.0353509	0.121907	0.00203728		4.76684	0.0928974	0.283597	0.00284317	0.514432			1609.45	16.1354	1984.32	14.8704	8533.49	1041.57	40851.4
OD306	AP24C019	ok	1538.52	26.3047	0.278369	0.0172653		1.16477e-07	3.21066	0.38858	4.6909	64.8002	13.2739	5898.7	1.57686e+14		3.59235	0.0620232	0.122935	0.00315232		4.71843	0.145861	0.278369	0.00480613	0.558514			1583.14	27.3335	1999.25	22.7772	2792.53	332.819	11775.3
OD306	Ap19D439	ok	1558.63	30.9205	0.282262	0.0200619		1.12953e-07	3.6556	0.451527	4.37492	59.6492	14.5893	7008.32	1.61393e+14		3.54281	0.0710755	0.123388	0.00350544		4.80203	0.167012	0.282262	0.00566271	0.576833			1602.74	32.1541	2005.78	25.2166	3197.14	390.018	12923.4
OD306	AU20B032	ok	1566.18	27.9844	0.28369	0.0181113		9.74116e-08	3.92221	0.481047	3.87264	50.8049	15.7081	5985.31	157882691898414		3.52497	0.0638417	0.123453	0.00296301		4.82888	0.145194	0.28369	0.00513798	0.602347			1609.92	29.1577	2006.72	21.3011	4079.37	500.442	16757.5
OD306	DE09A079	ok	1526.73	20.2955	0.276471	0.0133317		9.06113e-08	4.37117	0.540983	5.51833	73.4789	17.1519		1.89496e+14		3.61702	0.0482209	0.123836	0.00278418		4.72061	0.123389	0.276471	0.00368582	0.510044			1573.56	20.9783	2012.22	19.9408	4792.04	609.593	23543.4
OD306	DE09A079	ok	1531.52	20.2812	0.277367	0.013276		9.05882e-08	4.36932	0.540788	5.51558	73.4608	17.1482		1.90116e+14		3.60533	0.0478644	0.123847	0.00278381		4.73633	0.123645	0.277367	0.00368233	0.50855			1578.09	20.9507	2012.37	19.936	4792.04	609.593	23543.4
OD306	MY14A225	ok	1538.43	23.6496	0.27876	0.0155861		9.5222e-08	3.66002	0.455563	3.48387	45.3726	14.4914	5536.06	1.40899e+14		3.58731	0.0559124	0.124169	0.00257483		4.77248	0.123802	0.27876	0.0043448	0.600833			1585.12	24.7058	2016.98	18.3819	3854.47	472.723	17307.2
OD306	Ap19D405	ok	1559.15	27.6924	0.283061	0.0177198		0.00800918	3.37493	0.425802	4.86628	67.1331	13.653	6512.36	1.65215e+14		3.53281	0.0626005	0.125482	0.00397894		4.89735	0.177894	0.283061	0.00501577	0.487818			1606.76	28.4714	2035.6	28.0486	2934	365.562	12047.6
OD306	AP24C023	ok	1600.03	23.4809	0.29092	0.0146245		0.0161592	4.51047	0.567592	4.79289	62.5874	17.8364	8504.92	1.89952e+14		3.43738	0.0502701	0.126157	0.00327928		5.06042	0.150928	0.29092	0.00425457	0.490342			1646.12	24.0738	2045.1	22.9677	3944.03	488.239	15855.5
OD306	SE24A082	ok	1557.08	25.7969	0.28292	0.0168685		0.00710644	2.18647	0.276295	1.95568	24.4088	8.20508	4184.49	7.92738e+13		3.53457	0.059623	0.126208	0.00241166		4.92323	0.125488	0.28292	0.00477244	0.661797			1606.05	27.0917	2045.8	16.8829	4651.78	584.32	16980.8
OD306	JL17C003	ok	1513.99	26.1494	0.274926	0.0172997		1.47451e-07	3.93329	0.47831	5.25406	73.2019	15.9804	6652.65	1.80652e+14		3.63735	0.0629251	0.126368	0.00370559		4.7902	0.16309	0.274926	0.00475614	0.508121			1565.76	27.0871	2048.05	25.9015	2742.76	329.686	11858.5
OD306	AU20B041	ok	1614.85	29.853	0.293826	0.0185761		0.00313714	2.58674	0.325016	3.08547	39.7728	10.0925	4178.67	1.14254e+14		3.40337	0.0632214	0.126565	0.00358654		5.12751	0.173738	0.293826	0.00545815	0.548236			1660.62	30.8479	2050.8	25.0224	2575.12	323.539	10270.6
OD306	AU20B035	ok	1544.03	23.8664	0.281004	0.0156192		9.71902e-08	4.9537	0.635198	5.66904	76.3547	20.0659	7189.59	2.12621e+14		3.55866	0.0555835	0.12777	0.00278333		4.95045	0.132696	0.281004	0.00438907	0.582702			1596.42	24.9348	2067.52	19.1989	5161.59	661.948	21420.6
OD306	SE24A284	ok	1518.14	17.8117	0.276172	0.0119281		0.0106179	3.56756	0.456679	5.32648	76.0031	15.3162	6946.45	1.80768e+14		3.62094	0.0431908	0.127796	0.00182414		4.86628	0.0905211	0.276172	0.0032942	0.641236			1572.05	18.7516	2067.87	12.5796	7501.29	913.547	23903.9
OD306	SE24A009	ok	1542.9	15.6017	0.281198	0.0101707		5.18445e-08	3.95814	0.510734	4.70194	62.7859	16.5754	6339.76	175137181010517		3.55621	0.0361691	0.12898	0.00197318		5.00078	0.0918676	0.281198	0.00285999	0.553639			1597.4	16.2466	2084.12	13.4575	7722.48	1005.73	34126.3
OD306	AP19E029	ok	1540.05	35.1379	0.280708	0.0231102		0.00300873	2.97464	0.383788	3.07917	41.6277	12.1296	6391.19	1.22574e+14		3.56243	0.0823286	0.129106	0.00391319		4.99693	0.190459	0.280708	0.00648722	0.606326			1594.92	36.8591	2085.84	26.6577	2623.35	335.74	10746.2
OD306	SE24A285	ok	1547.96	18.2678	0.282872	0.0119983		0.0109804	4.38462	0.573002	4.58211	62.3318	18.4407	6230.92	1.86246e+14		3.53516	0.0424159	0.131133	0.00178204		5.11451	0.0927174	0.282872	0.00339398	0.661853			1605.81	19.267	2113.19	11.9154	9439.33	1173.34	29421.6
OD306	AU20B034	ok	1549.09	25.0184	0.2832	0.0162761		0.00959483	3.45203	0.451248	4.37212	58.3654	13.8055	6297.08	1.54058e+14		3.53107	0.0574719	0.131475	0.00305455		5.13379	0.14563	0.2832	0.00460939	0.57377			1607.46	26.1631	2117.76	20.3603	3622.28	473.586	14847.3
OD306	OC30C166	ok	1603.11	27.2349	0.294065	0.0170031		0.00707495	4.34927	0.58285	6.43391	87.7282	17.1744	7179.07	218594506190851		3.40061	0.057821	0.13356	0.00353081		5.4153	0.170214	0.294065	0.00500003	0.54095			1661.81	28.256	2145.3	23.0963	5338.67	731.327	26437.3
OD306	NO12B510	ok	1509.79	16.7201	0.276738	0.011114		0.0167015	3.9084	0.525733	5.65339	77.5231	15.5572	7793.98	1.82884e+14		3.61352	0.0401607	0.134237	0.00225948		5.12205	0.103313	0.276738	0.00307567	0.551012			1574.91	17.5036	2154.13	14.6911	7575.59	1026.65	38433.6
OD306	JL17C004	ok	1543.69	36.4019	0.284103	0.0232151		0.0246027	3.21621	0.496506	3.65707	45.4153	12.5067	5983.36	1.29803e+14		3.51985	0.0817138	0.137126	0.00613227		5.37153	0.270653	0.284103	0.00659548	0.46074			1611.99	37.4226	2191.22	38.8729	2237.87	341.502	9260.55
OD306	AP19E030	ok	1566.72	37.1124	0.289224	0.0235325		0.00173661	2.85882	0.409055	2.87644	36.0278	11.0378	5552.8	1.11395e+14		3.45752	0.0813643	0.139364	0.00553261		5.55759	0.256481	0.289224	0.00680619	0.509917			1637.65	38.5381	2219.32	34.403	2458.14	348.872	9533.57
OD306	AP19E038	ok	1569.82	28.3117	0.290656	0.0182038		1.18576e-07	5.1999	0.750442	5.83393	74.7849	20.1043	9696.54	214873738913926		3.44049	0.0626302	0.141785	0.00323343		5.68213	0.165803	0.290656	0.00529106	0.623852			1644.81	29.9418	2249.12	19.6993	4431.97	634.148	17202.5
OD306	JL17C202	ok	1575.06	33.9832	0.292432	0.0217739		0.0300845	5.11985	0.735175	6.13291	81.4669	20.2828	7321.85	2.25189e+14		3.4196	0.074458	0.144016	0.00387702		5.80681	0.201055	0.292432	0.00636737	0.628866			1653.67	36.0068	2276.06	23.1872	4562.97	651.766	19167
OD306	AU20B038	ok	1552.71	21.8201	0.289788	0.0140328		0.00872176	5.83406	0.857711	7.03772	90.4686	23.0652	8308.75	2.49303e+14		3.45079	0.0484242	0.148612	0.0030134		5.93793	0.146425	0.289788	0.00406653	0.569068			1640.47	23.0204	2330.01	17.3654	5964.17	876.875	24130.5
OD306	Ap19D387	ok	1556.79	27.932	0.290648	0.0179629		0.0204117	5.04108	0.754816	6.58155	84.2189	19.7447	6757.47	2.22488e+14		3.44059	0.061803	0.148836	0.00372308		5.96454	0.183685	0.290648	0.00522089	0.583286			1644.77	29.5448	2332.6	21.417	4490.47	663.971	17871.6
OD306	AU20B036	ok	1538.77	23.5579	0.29114	0.0153099		0.0139428	5.43638	0.870482	6.31818	78.9932	21.258	7797.86	2.22056e+14		3.43478	0.0525862	0.160006	0.00318139		6.42303	0.161181	0.29114	0.00445733	0.610097			1647.22	25.2189	2455.73	16.8088	5732.39	917.979	22956.4
OD306	MY08A099	ok	1561.66	15.8894	0.296452	0.0102196		0.00953772	4.84038	0.787868	7.20216	91.6612	18.2017	7820.55	2.23357e+14		3.37322	0.0344729	0.162469	0.00186028		6.64089	0.101921	0.296452	0.00302961	0.66588			1673.69	17.1044	2481.52	9.65474	9722.08	1585.07	42615.8
OD306	OC30C103	ok	1609.37	23.0886	0.305902	0.0143528		0.0117964	4.63982	0.7595	4.93435	57.0576	17.1467	5922.51	1.79801e+14		3.26902	0.0469196	0.163046	0.00285801		6.87693	0.155799	0.305902	0.00439057	0.633529			1720.51	24.6942	2487.5	14.7715	5218.77	862.896	24146.1
OD306	SE24A078	ok	1607.28	39.4216	0.308954	0.0243321		0.00172132	3.10964	0.524201	2.89443	30.5417	10.2196	4730.31	1.0254e+14		3.23673	0.0787563	0.172254	0.00556345		7.33776	0.296722	0.308954	0.00751748	0.601717			1735.56	42.2297	2579.66	26.9712	5405.74	906.588	17362
OD306	Ap19D415	ok	1543.92	24.0075	0.298548	0.014977		0.0253288	5.10279	0.912735	6.09366	70.7338	19.4557	9321.85	2.02062e+14		3.34955	0.0501663	0.17764	0.00456045		7.31231	0.217335	0.298548	0.00447136	0.503907			1684.1	25.2229	2630.96	21.3327	4426.04	781.848	17118.5
OD306	JA23C004	ok	1609.96	34.2844	0.314207	0.0204928		1.07671e-07	4.58478	0.853362	5.68034	66.2038	16.6564	6873.34	1.88644e+14		3.18262	0.0652208	0.184573	0.00624689		7.99621	0.316376	0.314207	0.00643898	0.517943			1761.37	36.0955	2694.39	27.9554	4371.23	812.211	18513.8
OD306	JA23C006	ok	1601.93	30.955	0.316107	0.0189312		0.0550105	5.86752	1.14407	7.59002	88.0843	21.5188	7101.85	2.45625e+14		3.16349	0.0598885	0.193502	0.00485235		8.43375	0.264989	0.316107	0.00598428	0.602519			1770.69	33.5212	2772.16	20.564	5626.09	1089.79	23893.2
OD306	JL17C180	ok	1530.72	50.7129	0.31133	0.0323306		0.0456866	5.30423	1.10172	6.9368	68.5775	17.6016	5521.62	186667457652457		3.21203	0.103847	0.217774	0.00860935		9.3482	0.477414	0.31133	0.0100655	0.633063			1747.25	56.4896	2964.3	31.8717	3116.21	643.476	10968.3
OD306	NO12B592	ok	1537.6	23.4725	0.313894	0.0150177		0.0247848	3.07808	0.683846	3.86758	41.0333	10.8092	5247.39	1.13881e+14		3.18579	0.0478434	0.220643	0.00345881		9.54934	0.207305	0.313894	0.00471397	0.691782			1759.84	26.4288	2985.39	12.6151	5851.4	1310.88	26245.8
OD306	JA23A019	ok	1536.03	23.2525	0.272251	0.0152878		0.00862119	5.65011	0.59888	6.62861	91.6083	23.3352	8370.59	2.49285e+14		3.67309	0.0561533	0.105509	0.00283493		3.96059	0.122437	0.272251	0.0041621	0.494529			1552.22	23.7299	1723.21	24.6761	4460.71	481.329	23028.6
OD306	JA23A016	ok	1503.22	24.577	0.266621	0.0166237		1.37006e-07	5.475	0.583586	6.58944	96.841	23.3546	8344	2.49739e+14		3.75064	0.0623495	0.106689	0.00264393		3.92205	0.117038	0.266621	0.00443223	0.557077			1523.63	25.3283	1743.6	22.7011	4103.37	445.415	21854.7
OD306	JA23A011	ok	1569.81	27.2505	0.279499	0.0172523		0.00355521	3.73518	0.395424	4.25176	59.4607	15.3361	7486.77	1.66944e+14		3.57783	0.0617256	0.108793	0.00413902		4.19261	0.175141	0.279499	0.00482199	0.412993			1588.84	27.4111	1779.31	34.6962	2858.12	308.315	14623.2
OD306	JA23A022	ok	1471.16	27.6859	0.263892	0.0189358		1.34885e-07	5.19625	0.59142	6.47369	87.92	21.5333	8190.58	2.23193e+14		3.78942	0.0717559	0.116797	0.00384253		4.24973	0.161317	0.263892	0.00499702	0.498844			1509.73	28.5879	1907.78	29.5393	3960.76	458.77	20539.2
OD306	JA23A004	ok	1542.34	27.8476	0.277941	0.018135		0.0134985	4.28117	0.512374	4.70135	66.337	17.9941	6201.74	1.878e+14		3.59788	0.0652477	0.119486	0.00369257		4.57902	0.164075	0.277941	0.00504048	0.506115			1580.99	28.6712	1948.56	27.614	3452	421.351	18026.4
OD306	JA23A023	ok	1546.35	25.5761	0.278785	0.0167335		0.00916132	5.58045	0.671404	6.48548	86.7262	22.5068	7544.29	2.4023e+14		3.587	0.0600229	0.11979	0.00292075		4.6046	0.136167	0.278785	0.00466504	0.565856			1585.24	26.5266	1953.09	21.7751	4264.66	522.111	21531.3
OD306	JA23A015	ok	1530.08	27.8508	0.275815	0.0183143		0.0312687	5.81116	0.686363	7.06134	99.1409	24.1687	9065.63	2.62286e+14		3.62562	0.0664007	0.119939	0.00362871		4.5612	0.161312	0.275815	0.00505136	0.517849			1570.25	28.7581	1955.31	27.0126	4501.34	541.485	23365.7
OD306	JA23A026	ok	1528.54	24.4665	0.278135	0.0160968		1.32316e-07	5.3495	0.682785	6.51766	86.0684	21.3854	8058.98	2.29795e+14		3.59538	0.0578742	0.127851	0.00319149		4.903	0.145631	0.278135	0.00447709	0.541937			1581.96	25.4646	2068.64	21.9975	4160.08	540.129	20840.3
OD306	JA23A002	ok	1556.55	25.5573	0.283605	0.0164992		0.0159506	4.87179	0.630808	5.13898	68.6714	20.0356	8852.96	2.04803e+14		3.52603	0.0581768	0.128538	0.00327712		5.02628	0.15264	0.283605	0.00467927	0.543304			1609.49	26.5554	2078.07	22.443	3937.32	520.084	20100.1
OD306	JA23A020	ok	1578.01	35.217	0.304019	0.0221938		0.0422245	5.77643	1.0331	7.25285	85.8075	21.4198	7177.63	2.38028e+14		3.28926	0.0730012	0.174359	0.00493241		7.30883	0.262795	0.304019	0.00674734	0.617253			1711.21	37.9782	2599.93	23.5769	4553.3	828.928	21113.1
OD306	MY05A004	ok	1524.85	17.7435	0.26849	0.01183		0.00405375	4.89474	0.488497	5.64878	80.6408	19.9575	7213.54	2.14263e+14		3.72454	0.0440614	0.100061	0.00186733		3.70421	0.0818467	0.26849	0.00317624	0.535402			1533.13	18.137	1625.23	17.354	7554.55	755.711	37532.2
OD306	MY05A003	ok	1544.42	18.3807	0.272198	0.012099		6.54741e-08	3.66168	0.36664	3.65892	51.4263	14.7184	5937.45	1.50341e+14		3.6738	0.0444493	0.100528	0.00188122		3.77289	0.0840749	0.272198	0.00329333	0.542948			1551.95	18.777	1633.88	17.3824	5752.05	577.301	28180.8
OD306	MY05A053	ok	1557.71	16.9056	0.274736	0.0110594		0.0185573	5.44277	0.547399	6.60324	94.1202	22.1749	7349.23	2.49457e+14		3.63986	0.0402548	0.100906	0.001563		3.82237	0.0727498	0.274736	0.00303842	0.581077			1564.8	17.3057	1640.84	14.3752	8415.24	847.756	41149.7
OD306	MY05A227	ok	1534.83	16.8479	0.271011	0.0111436		6.52525e-08	5.15347	0.529122	6.30603	90.7805	21.2259	7983.9	2.35709e+14		3.68989	0.0411188	0.102293	0.00181825		3.82236	0.0801904	0.271011	0.00302005	0.531174			1545.93	17.2273	1666.13	16.4427	8139.43	835.144	38140.9
OD306	MY05A054	ok	1523.63	18.8786	0.269068	0.0126277		0.00789064	4.73987	0.483379	6.10609	86.9442	19.7155	7460.38	2.20351e+14		3.71653	0.046931	0.102612	0.00183858		3.80683	0.0834472	0.269068	0.00339771	0.57607			1536.07	19.397	1671.9	16.5625	7306.06	746.308	36462.9
OD306	MY05A202	ok	1571.04	17.9406	0.278436	0.0115695		6.9143e-08	5.13251	0.536248	5.06421	68.6512	20.7677	8243.46	2.11334e+14		3.59149	0.0415519	0.10484	0.00193767		4.02489	0.0877615	0.278436	0.00322137	0.530599			1583.48	18.3201	1711.51	16.9987	7648.54	798.854	35481.5
OD306	MY05A252	ok	1527.16	16.5422	0.270816	0.0109834		0.0227248	5.00531	0.530477	6.02861	85.098	20.4441	7132.09	2.22902e+14		3.69254	0.0405567	0.106102	0.00185456		3.96185	0.0817864	0.270816	0.00297449	0.532053			1544.94	16.9688	1733.48	16.0318	8412.18	890.666	38792.3
OD306	MY05A179	ok	1549.89	18.5969	0.27503	0.012194		0.0057885	4.84284	0.508224	4.69309	65.223	19.9894	7929.09	1.99263e+14		3.63596	0.0443367	0.106272	0.00189903		4.02997	0.0871827	0.27503	0.00335371	0.563658			1566.29	19.0992	1736.43	16.3839	7632.73	800.975	36375.7
OD306	MY05A028	ok	1519.98	16.8414	0.269586	0.0112573		6.67581e-08	5.15007	0.542016	6.12317	86.7526	21.1924	7709.63	2.28073e+14		3.70939	0.0417576	0.106365	0.00180714		3.95365	0.0805793	0.269586	0.00303481	0.552342			1538.7	17.3216	1738.03	15.5743	7936.37	836.932	39499.7
OD306	MY05A029	ok	1524.96	17.466	0.270657	0.0116255		0.00480979	4.59747	0.487212	6.55024	94.675	18.8681	7893.9	2.25077e+14		3.69471	0.042953	0.106866	0.00191055		3.98805	0.0850469	0.270657	0.00314653	0.545148			1544.14	17.9514	1746.64	16.3707	7017.7	745.175	34823.8
OD306	MY05A131	ok	1549.21	19.1042	0.27525	0.012521		6.49288e-08	3.64841	0.389465	3.94831	55.9918	15.0769	6105.72	1.58649e+14		3.63307	0.0454897	0.107339	0.00200206		4.07366	0.0915137	0.27525	0.00344641	0.557364			1567.39	19.6254	1754.72	17.062	5786.13	618.037	28017.8
OD306	MY05A082	ok	1619.5	26.6367	0.289944	0.0167017		0.0212799	4.05358	0.454332	5.36722	68.3323	15.9491	6079.76	1.88258e+14		3.44894	0.057603	0.112737	0.00247448		4.50697	0.124306	0.289944	0.00484255	0.605551			1641.25	27.4116	1844.01	19.8592	6657.21	747.095	31158.2
OD306	MY05A154	ok	1566.05	17.6385	0.282759	0.0113553		0.00780048	4.50234	0.545139	6.59569	88.9299	18.1345	7304.92	2.20228e+14		3.53658	0.040159	0.120751	0.00210934		4.70769	0.098084	0.282759	0.00321082	0.545015			1605.24	18.228	1967.35	15.5745	7148.82	865.827	33501.8
OD306	MY05A105	ok	1581.26	21.4181	0.285701	0.0136254		6.68325e-08	3.86066	0.464175	3.97229	53.2022	15.3432	6001.65	1.60429e+14		3.50016	0.0476912	0.121098	0.00263375		4.77037	0.122429	0.285701	0.00389279	0.530906			1620.01	22.0733	1972.47	19.3792	5946.95	715.693	27916.4
OD306	MY05A081	ok	1608.29	28.1477	0.293796	0.0176337		7.56453e-08	4.1379	0.533461	5.24658	68.7764	15.5341	5776.32	1.84797e+14		3.40372	0.0600202	0.130006	0.00322023		5.26635	0.160126	0.293796	0.00518071	0.579951			1660.47	29.2803	2098.04	21.7553	5630.19	726.775	25150.4
OD306	MY05A251	ok	1533.94	19.3456	0.296823	0.0122954		0.0168507	4.3745	0.789369	6.22481	74.7992	16.305	6690.11	1.87164e+14		3.36902	0.0414235	0.178282	0.00333108		7.29636	0.163198	0.296823	0.00364957	0.549714			1675.53	20.6014	2636.96	15.5169	7232.67	1303.85	30445.7
OD306	MY29A031	ok	1545.09	17.4577	0.271519	0.0115309		0.0183401	3.79917	0.373048	5.75269	79.5532	15.5642	7375.4	1.90191e+14		3.68299	0.0424683	0.0980001	0.00156203		3.66883	0.0721759	0.271519	0.00313086	0.586138			1548.51	17.8557	1586.41	14.8969	7796.28	763.566	37374.3
OD306	MY29A104	ok	1539.12	16.7193	0.271009	0.0110936		5.11841e-08	3.86519	0.384611	5.4363	76.3298	15.7673	7007.78	1.86596e+14		3.68992	0.0409346	0.0998214	0.00146956		3.72999	0.0687578	0.271009	0.00300647	0.60181			1545.92	17.1499	1620.76	13.6981	7829.07	778.183	36999.3
OD306	MY29A128	ok	1546.17	16.924	0.272563	0.0111427		0.0132894	3.75794	0.377606	5.36392	73.6854	15.1964	6822.67	180904346983597		3.66888	0.0408811	0.100678	0.00165421		3.78358	0.0751138	0.272563	0.00303708	0.561271			1553.8	17.3134	1636.64	15.2566	8019.76	805.327	37449.8
OD306	MY29A055	ok	1520.96	15.9237	0.268162	0.0106564		0.00623016	3.95502	0.401939	5.66673	78.3821	16.3127	7066.07	1.89804e+14		3.72909	0.0397388	0.101274	0.00162377		3.74451	0.0720886	0.268162	0.00285765	0.553529			1531.47	16.32	1647.59	14.867	8045.81	815.975	38703.2
OD306	MY29A009	ok	1555.65	17.346	0.274502	0.0113791		4.91204e-08	3.94134	0.397673	5.45347	76.5061	16.0432	6746.45	1.90689e+14		3.64296	0.0414535	0.101349	0.00152104		3.83589	0.0722454	0.274502	0.00312358	0.604175			1563.61	17.7925	1648.97	13.9136	8303.11	835.233	39671.2
OD306	MY29A032	ok	1531.69	18.0469	0.270177	0.0120024		0.0109018	3.82689	0.389538	5.38342	75.0684	15.7353	6772.5	1.83861e+14		3.70128	0.0444243	0.101469	0.00176358		3.77992	0.0798396	0.270177	0.00324278	0.568241			1541.7	18.5041	1651.16	16.1086	7967.12	808.904	38328.1
OD306	MY29A007	ok	1572.38	22.1217	0.278439	0.0142682		4.99624e-08	2.91588	0.300163	2.48956	34.1058	11.5257	4551.28	1.12369e+14		3.59145	0.0512435	0.104097	0.00232184		3.99639	0.105816	0.278439	0.00397283	0.538872			1583.5	22.5937	1698.41	20.5484	6039.04	619.756	28026.8
OD306	MY29A153	ok	1610.16	35.4285	0.28537	0.0220423		5.36871e-08	1.28119	0.130409	0.732564	10.1547	4.84157	3517.45	4.31076e+13		3.50422	0.0772411	0.104204	0.00460375		4.10008	0.202437	0.28537	0.00629022	0.446438			1618.35	35.6722	1700.3	40.6918	2476.4	252.028	10770.9
OD306	MY29A127	ok	1544.27	20.9364	0.273778	0.0138179		4.90236e-08	2.85774	0.300259	2.86134	38.6877	11.482	4978.81	1.15502e+14		3.65259	0.0504711	0.10557	0.001963		3.98511	0.0923206	0.273778	0.00378303	0.596462			1559.95	21.5552	1724.26	17.0744	6046.2	634.849	28056.4
OD306	MY29A079	ok	1516.04	17.5034	0.269006	0.0116785		0.0259244	3.76108	0.399981	5.4332	75.6721	15.4997	6936.82	1.81148e+14		3.71738	0.0434133	0.10681	0.00210638		3.96164	0.0907983	0.269006	0.00314158	0.509546			1535.76	17.9353	1745.68	18.0604	7858.34	834.377	37645.4
OD306	MY29A103	ok	1541.69	15.8195	0.274383	0.0104409		0.0198379	3.9691	0.430386	5.0877	69.3921	15.9529	6387.23	1.79473e+14		3.64455	0.0380523	0.108928	0.0015683		4.12096	0.0732906	0.274383	0.0028648	0.587067			1563.01	16.3192	1781.57	13.1266	8102.85	877.638	37734.5
OD306	MY29A165	ok	1568.38	19.2827	0.279513	0.012496		4.76679e-08	2.86271	0.312459	2.93841	39.5982	11.3328	5078.82	1.17786e+14		3.57765	0.0447063	0.109639	0.00190116		4.22542	0.0903123	0.279513	0.0034928	0.584648			1588.91	19.855	1793.43	15.7864	6233.43	680.413	28356.9
OD306	MY29A008	ok	1572.56	16.6413	0.28198	0.0106248		0.0154517	4.70997	0.54459	5.89824	78.5363	18.6192	6335.91	2.11077e+14		3.54634	0.037679	0.114789	0.00215125		4.46294	0.0961458	0.28198	0.00299597	0.493185			1601.33	17.0137	1876.58	16.8899	9983.04	1150.77	46329.1
OD306	MY29A152	ok	1565.46	23.853	0.282382	0.015481		0.0092293	3.89382	0.462618	5.49251	74.2959	14.8735	6796.95	1.82252e+14		3.54131	0.054823	0.119948	0.00236942		4.67016	0.117208	0.282382	0.00437155	0.616842			1603.35	24.8214	1955.45	17.6366	7758.21	921.575	34112.6
OD306	MY29A166	ok	1556.77	22.543	0.281278	0.0145715		0.0104873	2.25976	0.275885	1.84917	23.7111	8.90418	4121.5	8.25463e+13		3.5552	0.0518046	0.121477	0.00283556		4.71119	0.129639	0.281278	0.00409864	0.529542			1597.79	23.2823	1978.03	20.7856	4875.91	595.334	22075.1
OD306	MY29A167	ok	1627.29	25.528	0.299385	0.0155138		0.00616836	2.50958	0.331271	2.32569	27.4153	9.08286	4008.79	9.27818e+13		3.34018	0.051819	0.135744	0.00378867		5.60343	0.17893	0.299385	0.00464462	0.485837			1688.26	26.1914	2173.6	24.3082	4935.35	651.548	20520.9
OD306	MY29A081	ok	1539.82	17.1293	0.272145	0.011344		5.03225e-08	4.53162	0.464271	6.5974	90.721	18.402	7401.32	2.19903e+14		3.67451	0.0416835	0.103002	0.00158922		3.86498	0.074016	0.272145	0.0030872	0.592361			1551.68	17.6022	1678.91	14.2493	9331.96	954.58	44038.6
OD306	MY29A073	ok	1563.83	19.7385	0.275812	0.0128671		0.00564654	3.4945	0.350015	4.07029	56.5864	13.9706	7281.97	1.5446e+14		3.62566	0.0466518	0.100785	0.0017791		3.83276	0.0837236	0.275812	0.0035489	0.58904			1570.24	20.2044	1638.62	16.3869	7390.79	739.002	34375.3
OD306	MY29A084	ok	1527.39	15.3493	0.270947	0.0102269		5.04886e-08	5.3475	0.567161	6.29398	88.9073	21.7693	7113.01	2.35306e+14		3.69076	0.0377449	0.106376	0.00155158		3.97399	0.0707924	0.270947	0.00277093	0.574094			1545.6	15.8067	1738.21	13.3702	10976.5	1162.43	51907.7
OD306	MY29A083	ok	1530.46	16.3472	0.270876	0.0108795		5.04498e-08	4.4411	0.464008	6.32693	86.4893	18.076	7109.43	2.11335e+14		3.69173	0.0401643	0.104386	0.00160208		3.89866	0.0733438	0.270876	0.00294701	0.578313			1545.25	16.8116	1703.53	14.1299	9122.81	951.708	43139.4
OD306	MY29A085	ok	1537.94	17.2391	0.273515	0.0114022		4.99848e-08	3.89431	0.423245	4.26318	58.5686	15.7284	5818.18	1.64348e+14		3.6561	0.0416877	0.108365	0.00173684		4.0867	0.0803841	0.273515	0.00311869	0.579686			1558.62	17.7718	1772.11	14.63	8074.36	876.246	37877
OD306	MY29A072	ok	1536.75	16.3009	0.271757	0.0108035		4.84916e-08	3.49904	0.359677	3.82725	53.2836	14.1985	5819.94	1.48739e+14		3.67975	0.0397542	0.103545	0.00158712		3.87984	0.0727565	0.271757	0.00293593	0.576111			1549.72	16.7424	1688.62	14.1383	7476.3	767.175	35299.3
OD306	MY29A082	ok	1539.95	21.6677	0.282447	0.0142203		0.0194238	4.83707	0.636105	7.25145	91.9215	18.341	7107.47	2.21046e+14		3.54049	0.0503469	0.134324	0.0025016		5.23109	0.122575	0.282447	0.00401649	0.606878			1603.67	22.8048	2155.26	16.2528	8672.86	1138.78	38211.5
OD306	MY29A075	ok	1530.42	16.2046	0.271009	0.0107436		4.85165e-08	3.34172	0.350745	4.84327	67.784	13.4955	6109.03	1.6171e+14		3.68991	0.039643	0.104827	0.00177935		3.91706	0.0786876	0.271009	0.00291162	0.534817			1545.92	16.6088	1711.29	15.6121	7136.92	747.83	33522.6
OD306	MY29A080	ok	1541.76	16.3154	0.271809	0.0107979		5.02503e-08	4.55443	0.460441	6.60331	91.3579	18.5151	7394.52	2.21662e+14		3.67905	0.0397262	0.100833	0.00147617		3.77893	0.068743	0.271809	0.00293498	0.593583			1549.98	16.7366	1639.5	13.5887	9392.23	948.029	44378.2
OD306	MA19a088	ok	1520.09	22.6488	0.268225	0.0151436		1.03122e-07	5.44318	0.550685	6.82067	96.0475	22.603	8442.18	2.47555e+14		3.72822	0.0564587	0.101977	0.00241572		3.77141	0.106036	0.268225	0.00406189	0.538619			1531.78	23.1968	1660.42	21.9292	5251.6	526.327	21604.1
OD306	MA19a070	ok	1506.45	22.6165	0.266034	0.0152992		1.02958e-07	5.25614	0.533184	6.0315	88.0188	22.2479	9213.57	2.33375e+14		3.75892	0.0575083	0.102923	0.00226712		3.77528	0.10125	0.266034	0.0040701	0.570455			1520.64	23.2645	1677.48	20.3469	5098.64	511.734	21408.9
OD306	MA19a058	ok	1497.23	19.7058	0.26518	0.0132963		0.00843821	5.38671	0.567218	6.29918	90.4445	23.0031	9226.58	2.38975e+14		3.77103	0.0501407	0.105588	0.00249379		3.8606	0.104637	0.26518	0.00352591	0.490571			1516.29	20.161	1724.57	21.6869	5280.75	549.752	22389.6
OD306	MA19a071	ok	1514.95	21.1266	0.26955	0.0141116		0.0291009	5.50263	0.604856	6.42739	90.6543	23.0177	9220	2.42476e+14		3.70989	0.0523523	0.109157	0.00251989		4.05689	0.109765	0.26955	0.00380377	0.52156			1538.52	21.7109	1785.4	21.0373	5225.68	568.373	21683.1
OD306	MA19a003	ok	1555.73	22.0908	0.27767	0.0143124		1.06487e-07	4.8182	0.527906	4.87641	65.9688	19.2155	9246.94	1.96437e+14		3.6014	0.0515446	0.111111	0.00272285		4.2539	0.120722	0.27767	0.00397411	0.504328			1579.62	22.608	1817.67	22.2436	4574.71	493.98	18176.7
OD306	MA19a057	ok	1513.94	23.1389	0.271081	0.0154895		0.02123	5.08603	0.581083	6.17743	85.8817	21.1791	9083.12	2.2593e+14		3.68893	0.0571397	0.114544	0.00265461		4.28127	0.119341	0.271081	0.00419891	0.555674			1546.29	23.9512	1872.72	20.8961	4994.02	564.062	20648.9
OD306	MA19a039	ok	1505.42	25.7418	0.274251	0.01725		0.0187733	5.08068	0.649798	6.13917	83.931	21.4161	8662.47	2.23518e+14		3.6463	0.0628988	0.129192	0.00324494		4.88523	0.148854	0.274251	0.00473084	0.566128			1562.34	26.9505	2087.01	22.0878	5232.87	660.904	21927.9
OD306	MA19a087	ok	1557.67	21.0081	0.287207	0.0134322		0.0193887	5.80259	0.804919	7.11458	92.0345	22.59	8922.68	2.49321e+14		3.48181	0.0467682	0.138475	0.0030359		5.48362	0.140992	0.287207	0.00385781	0.52242			1627.56	21.8616	2208.22	19.022	5616.89	771.806	21664.8

## Sheet: Plesovice Apatite
			207 cor 206Pb/238U		206Pb/238U			Pb204	Pb206	Pb207	Pb208	Th232	U238	140Ce	Radiation dose		Data for Tera-Wasserburg plot						Data for Wetherill plot					206Pb/238U		207Pb/206Pb		Pb206	Pb207	U238
	File ID	Comment	age	+/-1 ster	ratio	+/-1 RSE		ppm	ppm	ppm	ppm	ppm	ppm	ppm	decays / mg		238U/206Pb	1 std. error	207Pb/206Pb	1 std. error		207Pb/235U	1 std. error	206Pb/238U	1 std. error	Rho		age	+/-1 std err	age	+/-1 ster	raw cps	raw cps	raw cps
Plesovice-apatite	OC30C109	ok	327.484	12.322	0.106649	0.0237364		0.022582	0.840826	0.390519	0.876143	0.150516	8.8682	1431.39	9.75e+12		9.37653	0.222565	0.476463	0.0110043		7.0063	0.232038	0.106649	0.00253147	0.716712		653.259	15.506	4169.99	17.0914	966.711	454.033	12767.1
Plesovice-apatite	OC30C110	ok	312.288	18.398	0.128119	0.0295639		0.0212491	0.671229	0.361139	0.777646	0.0449308	5.88464	1366.24	6.14709e+12		7.80522	0.230753	0.566011	0.0157449		9.99865	0.405879	0.128119	0.00378771	0.728294		777.128	22.975	4423.08	20.2987	773.699	421.029	8493.75
Plesovice-apatite	OC30C111	ok	337.81	18.6986	0.130785	0.0332724		0.0143109	0.689631	0.360238	0.850785	0.011418	5.96456	1595.87	6.74767e+12		7.64612	0.254405	0.546895	0.0145172		9.86198	0.419764	0.130785	0.00435154	0.781706		792.344	26.3632	4372.87	19.4223	783.452	414.003	8485.23
Plesovice-apatite	OC30C112	ok	365.955	23.7875	0.13698	0.0378596		0.0314352	0.677401	0.356735	0.825328	0.0222191	5.80351	1600.23	7.13534e+12		7.30033	0.276388	0.536148	0.0186007		10.1261	0.519992	0.13698	0.00518602	0.737265		827.564	31.3313	4343.81	25.4244	847.352	451.507	9090.97
Plesovice-apatite	OC30C113	ok	354.292	16.3101	0.129914	0.0263006		0.0120199	0.836165	0.426498	0.994988	0.0413843	7.2896	1851.7	8.67059e+12		7.69742	0.202447	0.527113	0.0129488		9.44191	0.339802	0.129914	0.00341681	0.730802		787.373	20.7084	4318.88	18.0271	954.849	492.881	10424.6
Plesovice-apatite	OC30C114	ok	345.884	14.37	0.118494	0.0251999		0.020717	0.831562	0.404864	0.871694	0.0832097	7.88737	1758.66	9.16174e+12		8.43921	0.212668	0.498912	0.0120099		8.15123	0.284069	0.118494	0.00298605	0.723101		721.892	18.1916	4238	17.7449	950.104	468.22	11285.8
Plesovice-apatite	OC30C115	ok	326.459	23.2493	0.140935	0.0319695		0.0171506	0.566136	0.312299	0.749516	0.0268057	4.50333	1219.33	4.92253e+12		7.09548	0.226839	0.585561	0.0191811		11.3787	0.520823	0.140935	0.00450562	0.698454		849.947	27.1724	4472.57	23.8409	642.211	358.652	6397.72
Plesovice-apatite	OC30C116	ok	326.292	15.8674	0.118216	0.0280173		0.0179323	0.686431	0.341294	0.807118	0.0427063	6.51565	1398.68	7.11942e+12		8.45907	0.237	0.520289	0.0138072		8.48054	0.327266	0.118216	0.0033121	0.72602		720.289	20.1805	4299.75	19.4947	790.366	397.913	9395.84
Plesovice-apatite	OC30C117	ok	308.288	14.4569	0.109107	0.0274108		0.0250149	0.731734	0.360002	0.798246	0.0578721	7.54627	1525.2	7.77887e+12		9.16533	0.251229	0.509724	0.0134194		7.66812	0.291434	0.109107	0.0029907	0.721224		667.559	18.2983	4269.58	19.3724	836.136	416.619	10799.7
Plesovice-apatite	OC30C118	ok	378.183	20.3948	0.125182	0.0321982		0.0211561	0.733046	0.345603	0.777686	0.0451293	6.35324	1518.44	8.08806e+12		7.98838	0.257211	0.486262	0.0171827		8.39291	0.401228	0.125182	0.00403063	0.673524		760.32	24.4809	4200.09	26.1043	753.388	359.796	8178.09
Plesovice-apatite	OC30C119	ok	349.687	17.5342	0.12341	0.0296937		0.0164747	0.634344	0.311012	0.686188	0.0546063	5.79718	1531.32	6.80863e+12		8.10307	0.24061	0.511386	0.0146571		8.70164	0.359115	0.12341	0.0036645	0.719501		750.161	22.275	4274.37	21.0848	713.263	354.303	8164.36
Plesovice-apatite	OC30C120	ok	337.688	16.7027	0.120317	0.028445		0.0136406	0.590196	0.290175	0.694724	0.0530533	5.52364	1257.71	6.25766e+12		8.31135	0.236417	0.514428	0.0144416		8.53404	0.341065	0.120317	0.00342244	0.711744		732.391	20.8329	4283.09	20.6419	683.25	340.408	8009.41
Plesovice-apatite	OC30C121	ok	305.895	18.8759	0.116625	0.0338817		0.0249928	0.510911	0.257724	0.589448	0.0545047	4.93458	1250.55	5.04999e+12		8.57452	0.290519	0.538429	0.0173435		8.65805	0.404762	0.116625	0.00395144	0.724746		711.106	24.0935	4350.03	23.5976	599.356	306.432	7250.92
Plesovice-apatite	OC30C129	ok	356.838	31.2083	0.210071	0.0314938		0.0246357	0.569364	0.378506	0.864876	0.025543	3.05708	881.323	3.66555e+12		4.76029	0.14992	0.691313	0.0183426		20.0236	0.82459	0.210071	0.00661596	0.76477		1229.2	38.7122	4712.77	19.0796	646.984	436.586	4352.16
Plesovice-apatite	OC30C130	strange Pb/U @ beginning	357.844	76.6663	0.258842	0.0583018		0.0296084	0.558752	0.380846	0.978682	0.0126763	2.31786	796.543	2.78545e+12		3.86336	0.225241	0.753394	0.0408899		26.888	2.14174	0.258842	0.015091	0.731936		1483.92	86.5149	4836.08	38.8014	551.712	381.785	2867.39
Plesovice-apatite	OC30C131	older in 2nd half	348.556	75.631	0.301868	0.0478565		0.027638	0.479309	0.360214	0.870866	0.00198023	1.87324	968.902	2.18847e+12		3.3127	0.158535	0.802981	0.0355442		33.4213	2.17872	0.301868	0.0144464	0.734115		1700.57	81.3832	4927.03	31.5149	614.447	468.909	3008.71
Plesovice-apatite	JA05B280	ok	356.504	11.0086	0.123318	0.0180639		0.028294	0.998724	0.496503	1.17489	0.645715	9.21998	2002.97	1.12019e+13		8.1091	0.146482	0.503594	0.00830509		8.56267	0.209441	0.123318	0.00222761	0.738515		749.635	13.5413	4251.76	24.2949	1994.04	1003.74	23779.3
Plesovice-apatite	JA05B281	ok	342.267	11.7187	0.122397	0.0195681		0.049046	0.927033	0.470568	1.09204	0.0429149	8.62462	1912.47	9.89706e+12		8.17015	0.159874	0.51622	0.00916773		8.71176	0.230212	0.122397	0.00239507	0.740501		744.344	14.5654	4288.21	26.1091	1879.19	965.85	22591.8
Plesovice-apatite	JA05B282	ok	356.372	16.7844	0.157803	0.0217733		0.0222333	0.660636	0.385708	0.989018	0.00955825	4.79172	1113.68	5.72924e+12		6.33702	0.137978	0.59779	0.0114134		13.0066	0.376655	0.157803	0.00343589	0.751874		944.555	20.5661	4502.64	27.7484	1374.3	812.445	12885.5
Plesovice-apatite	JA05B283	ok	375.698	18.5896	0.172503	0.0242958		0.0274213	0.654824	0.392309	0.896985	0.0131424	4.334	1217.9	5.47471e+12		5.79701	0.140843	0.612798	0.0114375		14.5752	0.446544	0.172503	0.00419109	0.793013		1025.89	24.9247	4538.64	27.0759	1359.58	824.764	11636.3
Plesovice-apatite	JA05B284	ok	348.44	14.1279	0.143756	0.0202655		0.0150393	0.838048	0.472585	1.08605	0.0418808	6.67174	1697.78	7.8012e+12		6.95622	0.140972	0.571561	0.00998696		11.329	0.303143	0.143756	0.00291329	0.757357		865.868	17.5473	4437.31	25.4816	1683.41	961.229	17336.5
Plesovice-apatite	JA05B285	ok	336.253	10.3687	0.114964	0.019076		0.0237847	0.93232	0.456181	1.05775	0.0674374	9.24392	1929.74	1.04208e+13		8.69837	0.16593	0.49748	0.00802296		7.88568	0.196981	0.114964	0.00219305	0.763663		701.513	13.3821	4233.76	23.7821	1917.6	950.078	24603.7
Plesovice-apatite	JA05B286	ok	360.47	13.8266	0.14229	0.0205449		0.0271714	0.805596	0.437359	1.02686	0.0369464	6.48466	1621.12	7.85245e+12		7.02792	0.144388	0.556221	0.00962401		10.9124	0.29311	0.14229	0.00292333	0.764883		857.597	17.6192	4397.6	25.2862	1655.96	910.342	17255.3
Plesovice-apatite	JA05B287	ok	338.208	10.2989	0.116513	0.0172813		0.0379012	0.961202	0.472418	1.11188	0.0767731	9.40145	2096.57	1.06642e+13		8.58271	0.14832	0.500742	0.00829743		8.04435	0.192597	0.116513	0.0020135	0.7218		710.464	12.2777	4243.4	24.4222	2004.11	997.407	25383.6
Plesovice-apatite	JA05B297	ok	345.664	10.066	0.114986	0.0167821		0.0265737	0.971901	0.469206	1.04361	0.0713693	9.65922	1774.5	1.12043e+13		8.69668	0.145949	0.486535	0.00820949		7.71368	0.183571	0.114986	0.00192972	0.705187		701.642	11.7751	4200.92	24.929	1999.39	977.504	25816.6
Plesovice-apatite	JA05B298	ok	356.479	16.5132	0.143403	0.0226306		0.019447	0.638085	0.345563	0.848308	0.0296447	5.06287	1355.2	6.06074e+12		6.97337	0.157811	0.562981	0.0124556		11.1315	0.352295	0.143403	0.00324528	0.715059		863.875	19.55	4415.24	32.3024	1347.18	738.852	13891.9
Plesovice-apatite	JA05B299	ok	362.964	12.0011	0.126553	0.0182661		0.031791	0.770545	0.383998	0.869191	0.0425992	6.9151	1505.01	8.43459e+12		7.90185	0.144336	0.507296	0.00936361		8.85185	0.229866	0.126553	0.00231162	0.703405		768.169	14.0315	4262.55	27.1749	1609.29	812.184	18775.5
Plesovice-apatite	JA05B300	ok	335.886	14.7262	0.137971	0.0209233		0.0105004	0.606684	0.342145	0.823011	0.79532	5.01758	1198.35	5.84795e+12		7.24791	0.15165	0.568736	0.0112974		10.8193	0.312145	0.137971	0.00288681	0.725227		833.178	17.4329	4430.09	28.9794	1299.92	742.428	13980.9
Plesovice-apatite	JA05B301	ok	361.328	20.5746	0.164827	0.0276547		0.0331254	0.647693	0.386344	0.928459	0.0491713	4.33111	1145.3	5.26447e+12		6.06698	0.16778	0.608777	0.0137538		13.8353	0.494056	0.164827	0.00455823	0.774425		983.544	27.1996	4529.09	32.7903	1326.23	801.159	11536.4
Plesovice-apatite	JA05B302	ok	370.402	21.829	0.17561	0.0305808		0.039701	0.822116	0.512187	1.20254	0.0870176	5.16275	929.381	6.44684e+12		5.69444	0.174141	0.623223	0.0133788		15.0902	0.563821	0.17561	0.0053703	0.818469		1042.95	31.8942	4563.1	31.1031	1635.19	1031.73	13362
Plesovice-apatite	JA05B303	ok	435.513	31.3284	0.243822	0.0364276		0.0429049	0.880905	0.606786	1.44886	0.0596388	4.3367	905.466	6.40376e+12		4.10135	0.149402	0.689465	0.014617		23.1785	0.976924	0.243822	0.00888185	0.864283		1406.54	51.2368	4708.92	30.496	2073.52	1446.5	13286.9

## Sheet: Temora_Apatite
			207 cor 206Pb/238U		206Pb/238U			Pb204	Pb206	Pb207	Pb208	Th232	U238	140Ce	Radiation dose		Data for Tera-Wasserburg plot						Data for Wetherill plot					206Pb/238U		207Pb/206Pb		Pb206	Pb207	U238
	File ID	Comment	age	+/-1 ster	ratio	+/-1 RSE		ppm	ppm	ppm	ppm	ppm	ppm	ppm	decays / mg		238U/206Pb	1 std. error	207Pb/206Pb	1 std. error		207Pb/235U	1 std. error	206Pb/238U	1 std. error	Rho		age	+/-1 std err	age	+/-1 ster	raw cps	raw cps	raw cps
Temora-apatite	OC30C138	ok	458.888	26.9754	0.207181	0.0285086		0.0328186	0.743985	0.440018	1.23646	16.9481	4.00735	1656.87	1.2289e+13		4.82669	0.137602	0.616835	0.0150963		17.6206	0.662053	0.207181	0.00590645	0.758758		1213.78	34.6032	4548.16	17.7431	861.262	517.934	5813.32
Temora-apatite	OC30C139	ok	457.416	19.2167	0.167205	0.0244938		0.0283906	0.90223	0.46951	1.41073	13.6335	6.08043	1889.52	1.42793e+13		5.98069	0.14649	0.53359	0.0119786		12.3015	0.408719	0.167205	0.00409548	0.737206		996.692	24.4128	4336.8	16.4578	1038.08	549.38	8767.07
Temora-apatite	OC30C140	ok	407.159	21.0149	0.148765	0.0324999		0.0288833	0.862679	0.43282	1.34352	18.9545	6.65149	2420.38	1.51326e+13		6.72201	0.218464	0.529621	0.0142773		10.8634	0.458709	0.148765	0.00483484	0.769682		894.037	29.0561	4325.85	19.7749	994.924	507.745	9613.43
Temora-apatite	OC30C141	ok	460.182	20.6884	0.174519	0.0273501		0.016881	0.798518	0.428532	1.27989	14.735	5.13264	2039.17	1.32857e+13		5.73004	0.156717	0.549012	0.0121018		13.2107	0.464053	0.174519	0.0047731	0.778604		1036.96	28.3609	4378.53	16.1233	919.256	501.898	7404.97
Temora-apatite	OC30C142	Pb / U decoupled, U loss?	424.458	60.2409	0.209373	0.0616265		0.0108318	0.798335	0.502981	1.38429	9.77711	3.94057	1593.58	8.87741e+12		4.77617	0.294339	0.64428	0.0365951		18.5993	1.5588	0.209373	0.0129029	0.735315		1225.48	75.5218	4611.18	41.0485	756.534	485.016	4679.98
Temora-apatite	OC30C143	ok	432.178	34.8676	0.213625	0.0430191		0.0294214	0.517793	0.322686	0.897317	13.6475	2.72153	609.847	8.56617e+12		4.6811	0.201377	0.646105	0.0187764		19.0308	0.987986	0.213625	0.00918996	0.828643		1248.1	53.6922	4615.27	20.9976	570.692	361.968	3759.35
Temora-apatite	OC30C144	ok	424.806	30.3709	0.186034	0.0339457		0.0385093	0.772611	0.452439	1.31545	27.6953	4.43862	1532.59	1.55244e+13		5.37536	0.18247	0.601541	0.0193833		15.4297	0.722174	0.186034	0.00631505	0.725273		1099.85	37.3353	4511.72	23.4046	773.1	460.852	5566.57
Temora-apatite	OC30C152	ok	452.042	28.0697	0.217818	0.0276204		0.0345677	0.839341	0.515555	1.41406	9.45544	4.34658	1724.68	9.98131e+12		4.59099	0.126805	0.639797	0.0153112		19.2149	0.702222	0.217818	0.00601621	0.755775		1270.33	35.0871	4601.09	17.3035	1008.35	631.442	6546.05
Temora-apatite	OC30C153	ok	434.887	22.1093	0.182879	0.0243884		0.0357516	0.950748	0.548653	1.48731	10.8644	5.71936	1662.29	1.2085e+13		5.46811	0.133359	0.587412	0.013719		14.8118	0.500159	0.182879	0.00446013	0.722243		1082.68	26.4049	4477.17	16.9941	1054.8	620.68	7954.6
Temora-apatite	OC30C154	ok	442.894	17.54	0.137244	0.0278529		0.0209061	0.814666	0.360897	1.12784	16.728	6.71372	2264.98	1.58271e+13		7.28628	0.202944	0.460018	0.0118117		8.70504	0.329767	0.137244	0.00382265	0.735248		829.061	23.0917	4117.93	19.0589	907.325	409.935	9374.02
Temora-apatite	OC30C155	ok	454.085	15.9682	0.122058	0.0282782		0.0381764	1.39749	0.529415	1.76088	51.179	13.1983	1507.09	3.83971e+13		8.19284	0.231679	0.390558	0.0102702		6.57283	0.253812	0.122058	0.00345157	0.732305		742.397	20.9936	3873.12	19.8137	1734.58	670.31	20537.9
Temora-apatite	OC30C156	ok	394.649	13.9234	0.112075	0.0258933		0.030357	1.11068	0.44762	1.46661	23.9106	10.904	2221.56	2.18257e+13		8.92259	0.231035	0.41658	0.0108051		6.43737	0.23593	0.112075	0.00290199	0.7065		684.788	17.7314	3970.03	19.4252	1110.87	456.767	13672.9
Temora-apatite	OC30C157	ok	447.832	22.0847	0.191942	0.025811		0.0360406	0.927591	0.5366	1.52029	11.8145	5.43436	1829.23	1.23566e+13		5.2099	0.134473	0.59602	0.0125476		15.7737	0.525386	0.191942	0.00495423	0.774925		1131.89	29.2152	4498.33	15.3017	1057.1	624.031	7764.65
Temora-apatite	OC30C158	ok	408.824	42.0391	0.144354	0.0576406		0.0336749	0.866867	0.442163	1.39058	17.9648	6.54586	2372.74	1.47358e+13		6.92741	0.3993	0.51562	0.0330665		10.2627	0.884915	0.144354	0.00832066	0.668478		869.237	50.1034	4286.5	47.1448	812.815	423.156	7695.4
Temora-apatite	OC30C159	ok	484.624	40.8008	0.187761	0.0493643		0.0698275	1.16009	0.623277	1.94764	30.709	6.75392	2326.93	2.27191e+13		5.32593	0.262911	0.559835	0.0246072		14.4932	0.957961	0.187761	0.00926867	0.746846		1109.23	54.7565	4407.06	32.1016	980.889	537.986	7160.16
Temora-apatite	JA05B304	ok	422.751	17.428	0.150846	0.0247535		0.0395189	1.03774	0.521454	1.6215	21.0452	7.60968	2685.47	1.77845e+13		6.6293	0.164099	0.520971	0.0117001		10.8355	0.362156	0.150846	0.00373396	0.740608		905.701	22.4193	4301.67	32.9927	2199.45	1119.31	20999.6
Temora-apatite	JA05B305	ok	459.118	15.5301	0.190934	0.0166595		0.041335	1.10822	0.643442	1.80311	24.8785	6.56385	1911.61	1.91084e+13		5.2374	0.0872525	0.585636	0.00804422		15.4175	0.332893	0.190934	0.00318087	0.77156		1126.43	18.7658	4472.76	19.9942	2567.39	1509.68	19804.8
Temora-apatite	JA05B306	ok	475.738	16.6648	0.196751	0.018491		0.0346421	0.970724	0.561409	1.55082	14.592	5.59596	1880.29	1.44448e+13		5.08258	0.0939821	0.585154	0.00835046		15.874	0.370776	0.196751	0.00363812	0.791658		1157.84	21.4097	4471.56	20.7737	2309.94	1353	17348.2
Temora-apatite	JA05B307	ok	471.072	18.3439	0.207795	0.0197217		0.0318288	1.10261	0.65726	1.80977	15.1208	5.98389	2207.47	1.51123e+13		4.81244	0.0949092	0.609533	0.00897841		17.4636	0.429872	0.207795	0.00409806	0.801193		1217.06	24.0024	4530.89	21.3768	2599.09	1569.12	18381.7
Temora-apatite	JA05B308	ok	466.04	14.2778	0.173018	0.0165284		0.017199	1.03834	0.556814	1.55274	11.3543	6.76102	1810.99	1.48054e+13		5.77974	0.0955296	0.540711	0.00806723		12.8991	0.287213	0.173018	0.00285971	0.742308		1028.72	17.0031	4356.22	21.8525	2456.72	1334.28	20852.4
Temora-apatite	JA05B309	ok	523.961	19.0179	0.234259	0.0183776		0.0438033	1.26362	0.783345	2.13663	15.6617	6.0895	2040.51	1.72836e+13		4.26879	0.0784501	0.620923	0.00810387		20.0556	0.452062	0.234259	0.00430511	0.815315		1356.78	24.9344	4557.74	18.9148	2834.53	1779.7	17811.7
Temora-apatite	JA05B310	ok	473.846	16.5261	0.190401	0.0198947		0.0404344	0.90498	0.514559	1.44863	15.0583	5.37158	2036.51	1.41968e+13		5.25206	0.104488	0.573569	0.00829772		15.0576	0.370396	0.190401	0.00378798	0.808776		1123.55	22.3527	4442.43	21.0917	2197.05	1265.22	17009.2
Temora-apatite	JA05B328	ok	446.881	18.9293	0.193403	0.0221555		0.0156025	0.758021	0.445211	1.21627	10.9309	4.30018	1756.02	1.03069e+13		5.17056	0.114556	0.599589	0.0101455		15.9889	0.445736	0.193403	0.00428493	0.794733		1139.78	25.2524	4507	24.5864	1851.36	1101.45	13764.9
Temora-apatite	JA05B329	ok	425.149	17.6971	0.185777	0.0212321		0.0186618	0.726012	0.425418	1.2198	9.76401	4.28758	1742.83	9.3861e+12		5.38279	0.114288	0.600769	0.00977146		15.3887	0.411585	0.185777	0.00394443	0.793841		1098.46	23.3226	4509.86	23.6299	1780.8	1057.01	13786.9
Temora-apatite	JA05B330	ok	443.871	17.7977	0.197911	0.0197135		0.0300874	0.862972	0.518077	1.43263	11.7011	4.81997	1883.64	1.1282e+13		5.05278	0.0996082	0.610399	0.00921138		16.6565	0.413523	0.197911	0.00390152	0.794052		1164.09	22.9483	4532.95	21.8981	2118.49	1288.31	15515.6
Temora-apatite	JA05B331	ok	427.455	10.8581	0.137834	0.0175147		0.0457131	1.48436	0.698523	2.09459	25.1243	11.5987	1891.09	2.51042e+13		7.25509	0.127071	0.477418	0.00620718		9.07313	0.197912	0.137834	0.00241412	0.802949		832.404	14.5793	4172.95	19.2396	3018.7	1439	30937.9
Temora-apatite	JA05B332	ok	440.035	9.85266	0.131923	0.0157954		0.0416529	1.38234	0.610235	2.00961	32.179	11.4534	2301.9	2.80685e+13		7.58021	0.119733	0.444349	0.00577309		8.08248	0.165305	0.131923	0.00208377	0.772308		798.824	12.6178	4066.4	19.3465	3210.95	1435.88	34902.8
Temora-apatite	JA05B333	ok	438.326	18.6054	0.16922	0.0238291		0.0168481	0.745567	0.404413	1.18188	12.1573	4.66565	1898.62	1.10635e+13		5.90947	0.140817	0.554382	0.0114551		12.9349	0.407968	0.16922	0.00403236	0.755516		1007.81	24.0153	4392.76	30.2049	1631.36	896.386	13396.4
Temora-apatite	JA05B334	ok	475.366	18.2862	0.18	0.0246303		0.0380023	1.04879	0.569909	1.62873	14.694	6.67544	1914.42	1.62122e+13		5.55557	0.136835	0.549635	0.00960592		13.641	0.411971	0.18	0.00443344	0.815548		1066.97	26.2798	4380.18	25.5649	2737.1	1506.67	22866.6
Temora-apatite	JA05B335	ok	462.552	22.5372	0.228072	0.0215236		0.0351955	0.977918	0.632215	1.69279	12.6854	4.6194	1707.82	1.18131e+13		4.38458	0.0943717	0.64955	0.0110128		20.4261	0.559661	0.228072	0.00490893	0.785553		1324.39	28.5055	4622.95	24.4911	2192.55	1435.9	13597.4
Temora-apatite	JA05B336	ok	469.522	19.7487	0.197932	0.0219613		0.0353694	0.759655	0.441298	1.28372	10.1487	4.1845	1907.61	1.03764e+13		5.05224	0.110953	0.591982	0.0105574		16.1557	0.457051	0.197932	0.00434684	0.77628		1164.2	25.5674	4488.44	25.9382	1855.54	1091.95	13422.2
Temora-apatite	JA05B337	ok	419.409	9.78177	0.101448	0.0190872		0.00148359	0.901782	0.29269	1.15697	27.6126	9.67138	1588.75	2.27015e+13		9.85722	0.188147	0.333051	0.00698401		4.65862	0.132099	0.101448	0.00193637	0.673132		622.892	11.8893	3631.18	32.1128	2195.13	721.749	30922.6
Temora-apatite	JA05B338	ok	458.913	17.8527	0.188958	0.0210487		0.04423	0.772144	0.438015	1.21192	11.2668	4.43599	1751.69	1.09248e+13		5.29219	0.111394	0.58174	0.00959214		15.1564	0.405253	0.188958	0.00397732	0.787219		1115.73	23.4846	4463.04	24.0134	1891.05	1086.71	14273.3

## Sheet: Trace Elements
		La139	Ce140	Pr141	Nd146	Sm147	Eu153	Gd157	Dy163	Y89	Er166	Yb172
Apatite:		µg/g	µg/g	µg/g	µg/g	µg/g	µg/g	µg/g	µg/g	µg/g	µg/g	µg/g
Otter Lake		4803.43	11294.6	1151.1	4098.47	539.106	62.646	438.518	303.87	1941.76	175.528	147.183
Otter Lake		4533.82	10759.9	1097.21	3922.55	523.395	59.0233	426.665	298.342	1918.46	177.368	148.07
Otter Lake		4723.21	11170.7	1142.48	4096.48	546.391	62.9156	444.114	311.556	1987.94	185.807	154.818
Otter Lake		4754.9	10748.1	1080.23	3800.9	493.809	55.1212	397.372	275.114	1789.49	161.803	133.486
Otter Lake		4691.45	11217.7	1148.15	4108.69	548.553	62.3083	445.798	313.399	2007.37	185.082	155.224
Otter Lake		5017.2	11330.6	1130.82	3988.31	515.281	58.8559	417.031	292.38	1886.24	173.09	143.648
Otter Lake		4715.43	11109.8	1136.14	4076.48	547.639	61.8635	449.289	319.284	2028.28	187.15	158.938
Otter Lake		4804.9	10861.6	1086.59	3831.42	498.922	55.9176	403.546	278.863	1785.64	162.287	134.46
Otter Lake		3094.94	7488.8	773.637	2812.82	394.597	51.2245	340.265	231.136	1469.87	131.154	105.667
Otter Lake		4355.11	9826.65	983.995	3506.27	473.224	58.3086	406.012	275.042	1689.04	155.033	126.691
Otter Lake		4826.97	10907.3	1081.6	3824.5	494.402	55.9795	405.135	285.273	1882.16	169.187	140.792
Otter Lake		4482.14	10557.8	1081.67	3876.78	523.191	60.2696	428.838	303.68	1984.33	179.738	148.804
Otter Lake		4777.37	10799.6	1082.98	3801.83	493.848	55.3522	399.437	274.66	1784.65	162.049	134.44
Otter Lake		4811.4	10787	1069.95	3756.58	483.383	54.2812	390.722	268.666	1747.1	157.072	131.338
Otter Lake		4544.31	10311.3	1028.68	3629.43	470.36	53.0652	386.741	265.476	1759.48	156.02	129.121
Otter Lake		4787.86	10734.8	1067.79	3743.47	479.441	53.4975	385.71	266.534	1739.24	155.502	129.486
Otter Lake		5321.09	12016.9	1203.44	4236.93	526.165	61.9112	413.486	287.198	1872.31	167.681	138.308
Otter Lake		4161.08	9803.99	1009.53	3671.83	518.727	62.3502	441.941	311.68	1931.5	180.267	147.206
Otter Lake		1173.47	2710.6	219.989	597.771	72.212	9.52788	83.6612	59.5116	458.809	35.3521	23.4954
Otter Lake		1714.48	4793.23	501.85	2014.23	329.335	18.3774	314.209	222.486	1539.99	130.862	102.225
Avearge		4304.73	9961.55	1003.89	3569.79	473.599	53.6398	390.925	272.208	1760.18	159.402	131.67
1 standard deviation		1045.56	2270.46	234.934	839.413	105.443	13.762	77.984	54.7965	331.657	32.3907	28.6786
401 apatite		3256.14	7300.88	763.682	2660.7	395.568	39.9472	336.678	235.65	1412.69	124.173	82.5944
401 apatite		4363.12	9585.35	961.674	3351.17	487.908	46.8919	409.308	279.206	1646.76	146.535	93.503
401 apatite		4400.32	9631.74	983.448	3355.13	497.636	47.9705	415.548	280.594	1659.08	147.406	95.3238
401 apatite		3470.27	7877.59	813.375	2820.29	416.478	42.1373	357.924	244.367	1470.97	128.221	85.8773
Avearge		3872.46	8598.89	880.545	3046.82	449.397	44.2367	379.864	259.954	1547.38	136.584	89.3246
1 standard deviation		515.022	1030.17	93.9941	311.481	44.1345	3.30903	33.4916	20.1883	107.628	10.4895	5.25901
Durango		4544.67	5333.83	385.202	1239.58	164.231	16.6332	148.467	103.913	625.891	56.4297	39.2388
Durango		4546.38	5331.79	384.982	1237.73	163.279	16.0955	146.965	104.323	624.278	56.3309	39.1261
Durango		4291.89	5048.86	365.708	1175.37	156.775	16.1911	142.482	102.219	611.673	54.2178	38.0897
Durango		4528.87	5330.39	383.636	1231.08	163.793	16.5012	147.954	104.922	625.373	56.5701	38.9256
Durango		4523.98	5315.92	381.583	1232.48	163.035	16.5139	146.244	104.074	626.777	56.412	38.741
Durango		4599.64	5419.23	391.453	1254.59	166.499	16.6504	149.834	104.992	634.419	57.9437	40.1516
Durango		4684.19	5494.53	396	1276.34	170.483	17.0799	152.573	106.636	645.216	58.1033	40.1957
Durango		4181.24	5091.01	376.066	1210.05	159.466	16.8832	142.097	97.6235	595	52.913	35.8669
Durango		4100.63	5036.42	371.524	1199.97	158.749	16.8058	142.715	97.2132	590.909	52.3725	35.465
Durango		4081.06	5086.93	378.746	1227.01	164.527	17.256	147.463	100.158	606.123	53.3889	37.3199
Durango		4204.82	5203.73	389.402	1262.12	168.434	17.7003	148.342	102.034	614.453	53.7198	37.5814
Durango		3979.16	4865.47	359.409	1164.63	154.785	16.1376	138.725	96.5719	587.078	51.5356	36.0939
Durango		3953.55	4809.77	353.464	1144.47	153.387	15.9327	138.911	95.78	591.967	52.0995	35.4578
Durango		3950.13	4922.15	370.692	1205.39	161.626	16.898	142.875	97.4854	597.755	52.7048	35.294
Avearge		4297.87	5163.57	377.705	1218.63	162.076	16.6628	145.403	101.282	612.637	54.6244	37.682
1 standard deviation		255.89	206.608	11.8844	36.4682	4.79191	0.472766	3.98919	3.57733	17.6088	2.17755	1.7172
Kovdor		3455.65	7713.76	847.169	3228.62	417.267	97.1428	251.221	91.3751	251.264	21.3769	8.70226
Kovdor		3326.05	7462.78	816.648	3114.64	401.511	92.4866	240.489	87.2929	239.087	21.0312	8.03025
Kovdor		2860.65	6464.04	713.522	2737.42	356.307	82.2713	215.029	75.3408	201.742	17.4085	6.51206
Kovdor		3255.94	7223.92	788.17	2997.22	385.846	89.9964	231.196	82.033	222.546	19.2417	7.55603
Kovdor		3203.24	7319.09	808.907	3077.16	400.381	91.8949	240.923	86.8844	234.653	20.852	7.81045
Kovdor		3920.47	8713.63	948.417	3565.85	463.55	107.31	274.14	101.535	287.641	25.0429	9.94238
Kovdor		4183.36	9298.86	1008.49	3808.88	494.13	114.2	292.758	106.439	295.481	25.8913	10.016
Kovdor		3918.35	8653.16	941.651	3539.5	460.8	105.508	269.657	99.8027	274.922	23.659	9.36414
Kovdor		3392.99	7576.65	828.407	3149.82	409.001	94.5349	245.522	88.3667	243.419	21.2627	8.12131
Kovdor		2997.93	6679.65	733.339	2793.68	364.067	83.9059	217.827	77.9061	214.023	18.1691	6.93799
Avearge		3451.46	7710.55	843.472	3201.28	415.286	95.9251	247.876	89.6975	246.478	21.3935	8.29929
1 standard deviation		405.879	866.217	90.6165	326.457	42.4751	9.76192	23.576	9.71942	29.5954	2.64632	1.13516
McClure Mountain		1174.86	2011.04	186.778	669.022	82.4439	25.5604	64.514	32.6274	155.751	14.9258	10.1011
McClure Mountain		2058.27	3482.52	306.595	1017.03	115.249	48.3929	83.8461	44.3614	234.089	21.703	15.9806
McClure Mountain		1563.04	2571.77	229.587	780.988	90.0553	31.9233	65.9801	35.3669	195.274	17.9276	13.8275
McClure Mountain		1319.31	2007.82	166.447	544.094	57.6586	22.1502	41.7297	18.8989	98.322	8.36325	5.23729
McClure Mountain		2134.64	3598.32	326.904	1137.68	137.205	49.1258	101.397	53.773	268.657	25.5772	18.117
McClure Mountain		2254.11	3740.6	322.601	1069.77	121.538	54.404	87.4214	48.5061	262.467	25.1349	19.9436
Avearge		1750.7	2902.01	256.485	869.762	100.692	38.5928	74.148	38.9223	202.427	18.9386	13.8678
1 standard deviation		417.998	733.432	65.2312	218.976	26.7009	12.5278	19.2493	11.5122	60.6373	6.04248	4.9684
OD306		4803.43	11294.6	1151.1	4098.47	539.106	62.646	438.518	303.87	1941.76	175.528	147.183
OD306		4533.82	10759.9	1097.21	3922.55	523.395	59.0233	426.665	298.342	1918.46	177.368	148.07
OD306		4723.21	11170.7	1142.48	4096.48	546.391	62.9156	444.114	311.556	1987.94	185.807	154.818
OD306		4754.9	10748.1	1080.23	3800.9	493.809	55.1212	397.372	275.114	1789.49	161.803	133.486
OD306		4691.45	11217.7	1148.15	4108.69	548.553	62.3083	445.798	313.399	2007.37	185.082	155.224
OD306		5017.2	11330.6	1130.82	3988.31	515.281	58.8559	417.031	292.38	1886.24	173.09	143.648
OD306		4715.43	11109.8	1136.14	4076.48	547.639	61.8635	449.289	319.284	2028.28	187.15	158.938
OD306		4804.9	10861.6	1086.59	3831.42	498.922	55.9176	403.546	278.863	1785.64	162.287	134.46
OD306		3094.94	7488.8	773.637	2812.82	394.597	51.2245	340.265	231.136	1469.87	131.154	105.667
OD306		4355.11	9826.65	983.995	3506.27	473.224	58.3086	406.012	275.042	1689.04	155.033	126.691
OD306		4826.97	10907.3	1081.6	3824.5	494.402	55.9795	405.135	285.273	1882.16	169.187	140.792
OD306		4482.14	10557.8	1081.67	3876.78	523.191	60.2696	428.838	303.68	1984.33	179.738	148.804
OD306		4777.37	10799.6	1082.98	3801.83	493.848	55.3522	399.437	274.66	1784.65	162.049	134.44
OD306		4811.4	10787	1069.95	3756.58	483.383	54.2812	390.722	268.666	1747.1	157.072	131.338
OD306		4544.31	10311.3	1028.68	3629.43	470.36	53.0652	386.741	265.476	1759.48	156.02	129.121
OD306		4787.86	10734.8	1067.79	3743.47	479.441	53.4975	385.71	266.534	1739.24	155.502	129.486
OD306		5321.09	12016.9	1203.44	4236.93	526.165	61.9112	413.486	287.198	1872.31	167.681	138.308
OD306		4161.08	9803.99	1009.53	3671.83	518.727	62.3502	441.941	311.68	1931.5	180.267	147.206
OD306		1173.47	2710.6	219.989	597.771	72.212	9.52788	83.6612	59.5116	458.809	35.3521	23.4954
OD306		1714.48	4793.23	501.85	2014.23	329.335	18.3774	314.209	222.486	1539.99	130.862	102.225
Avearge		4304.73	9961.55	1003.89	3569.79	473.599	53.6398	390.925	272.208	1760.18	159.402	131.67
1 standard deviation		1045.56	2270.46	234.934	839.413	105.443	13.762	77.984	54.7965	331.657	32.3907	28.6786
